# Supplementary material
Source: Springer Nature journal article supplement (https://www.springermedizin.de/resource/supplementary/12967_2014_1868_MOESM4_ESM.pdf/9575022)

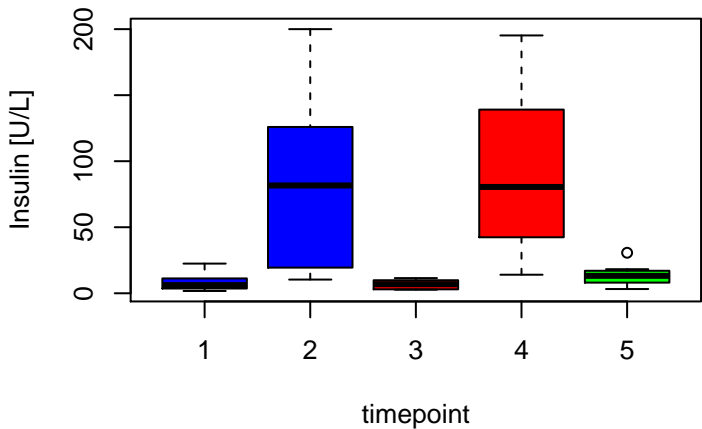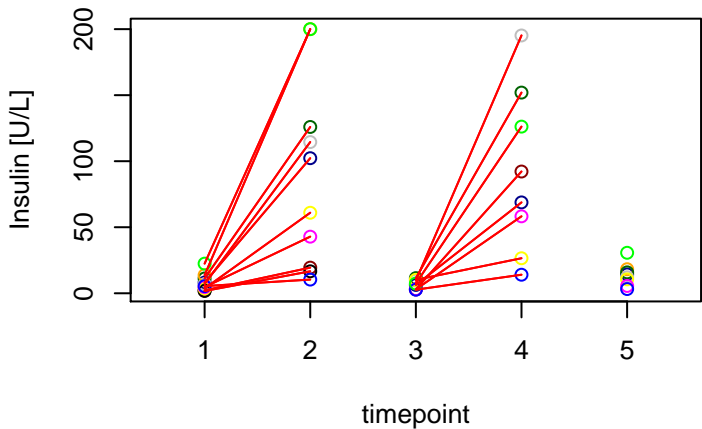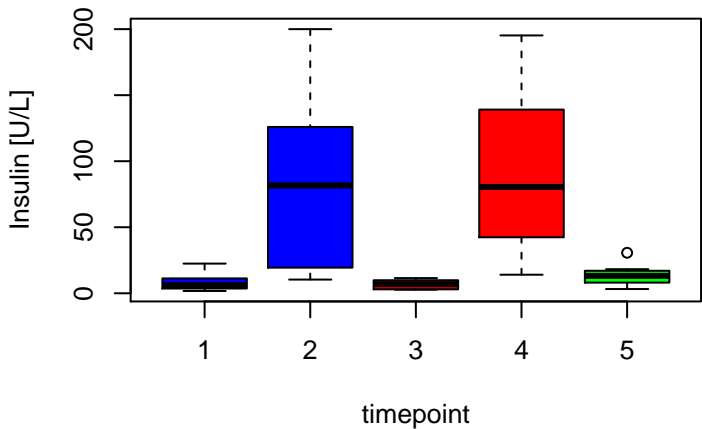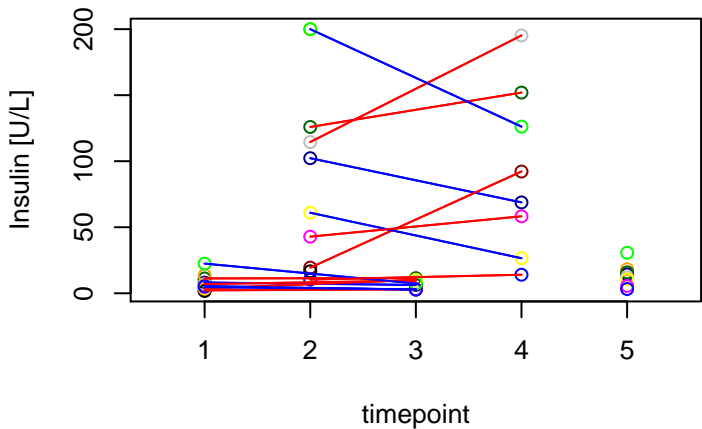

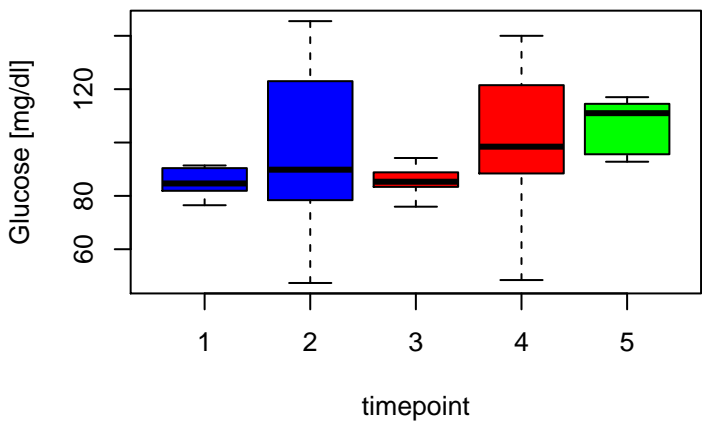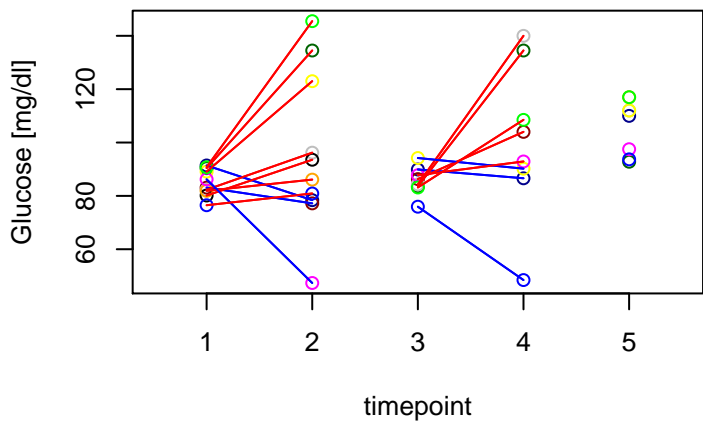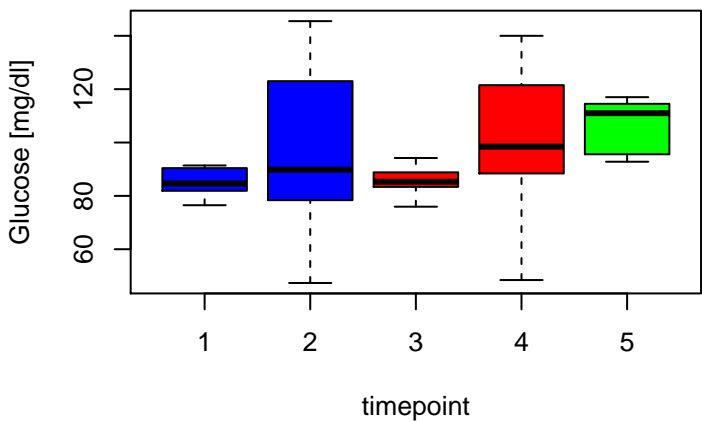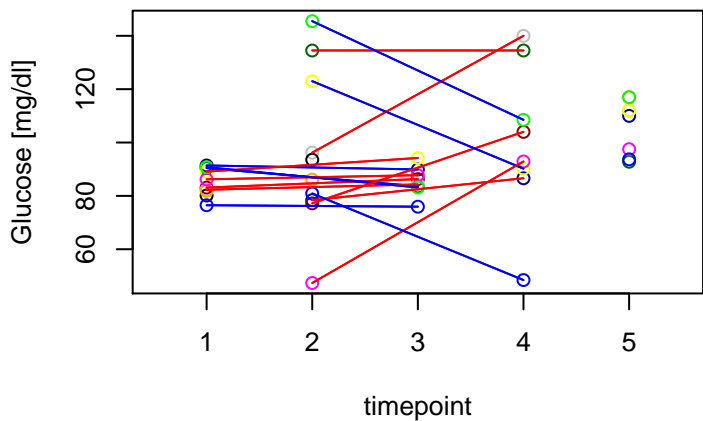

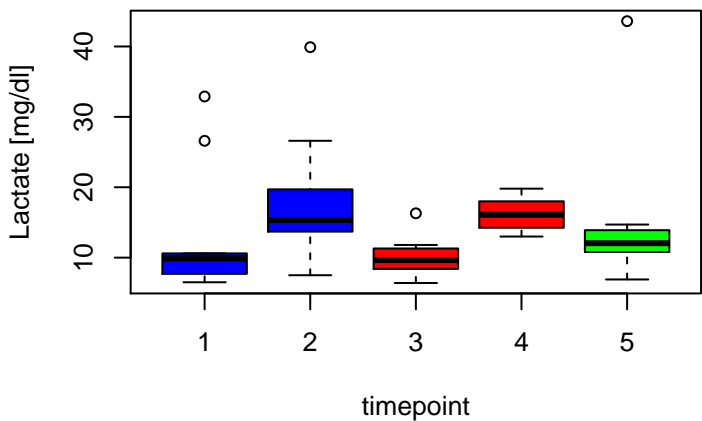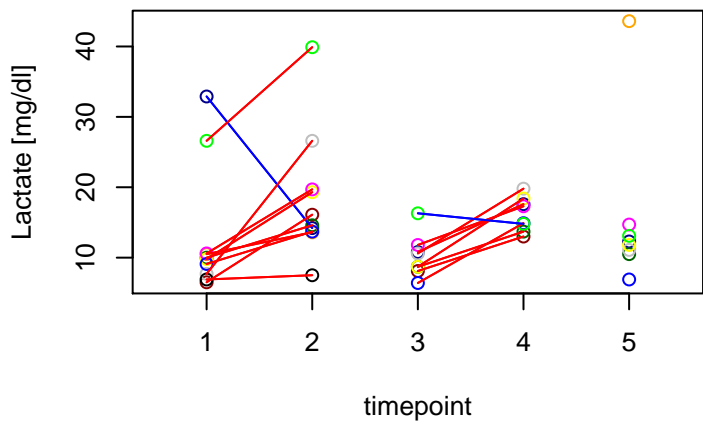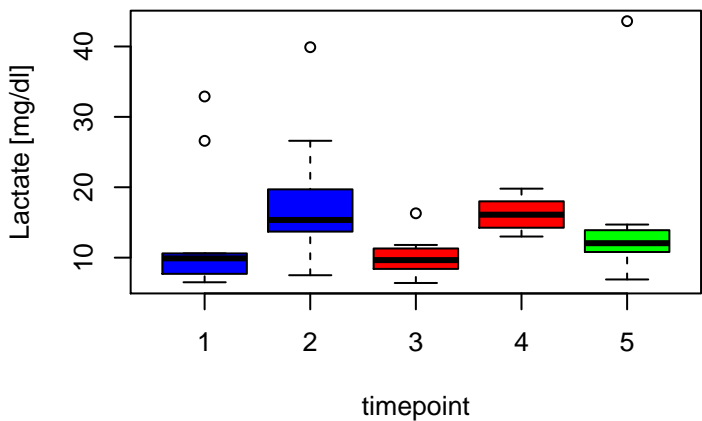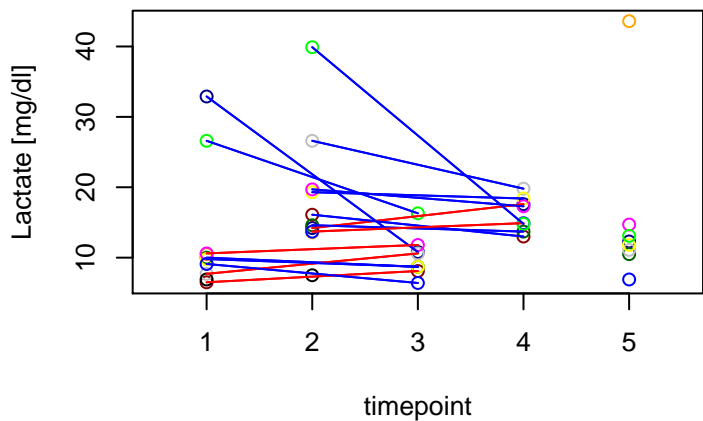

Non-esterified fatty acids [mmol/L]

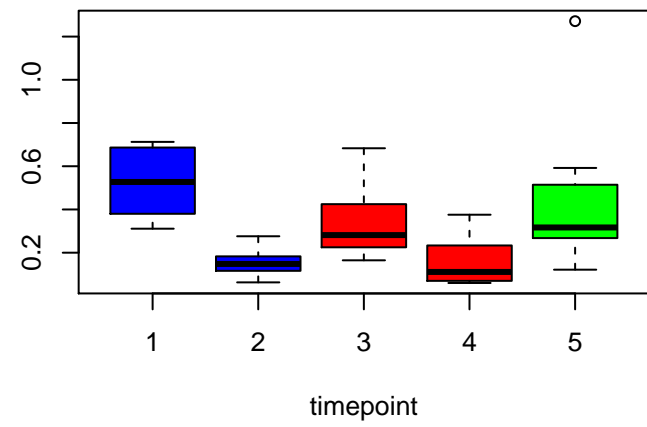

Non-esterified fatty acids [mmol/L]

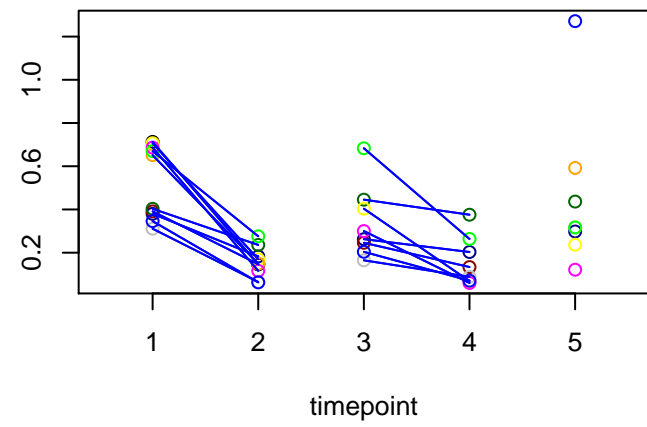

Non-esterified fatty acids [mmol/L]

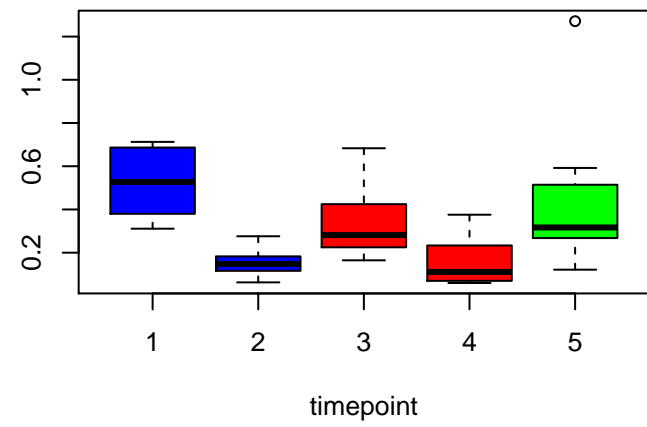

Non-esterified fatty acids [mmol/L]

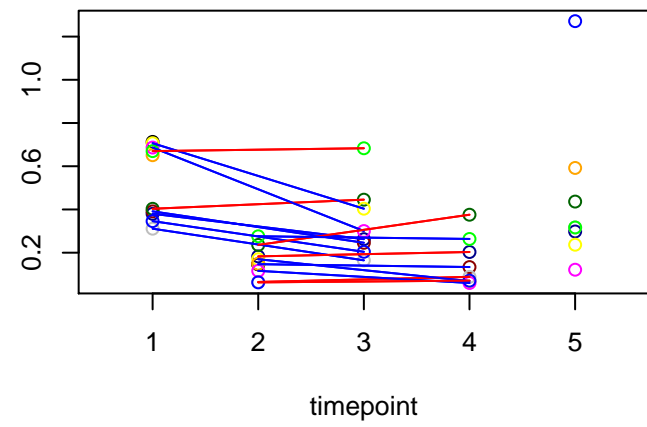

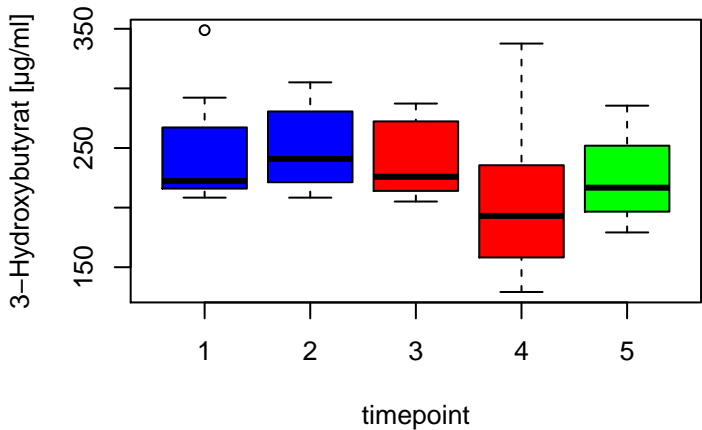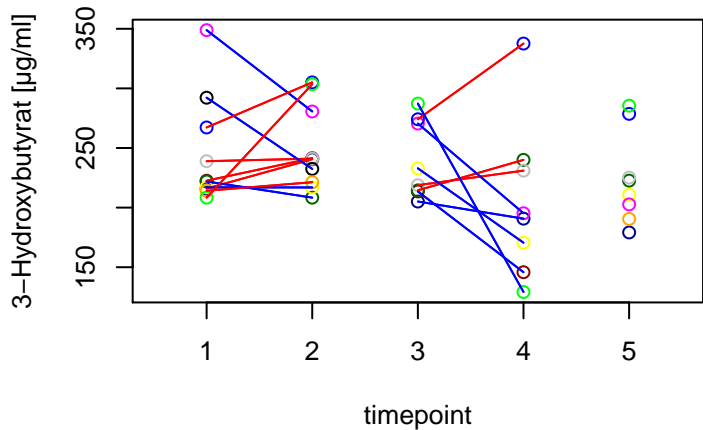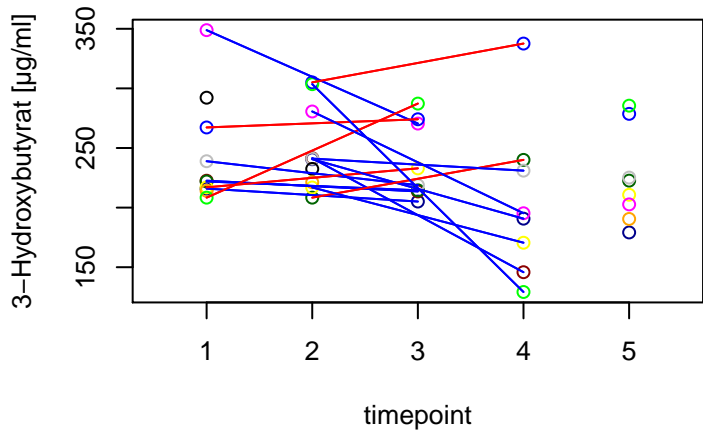

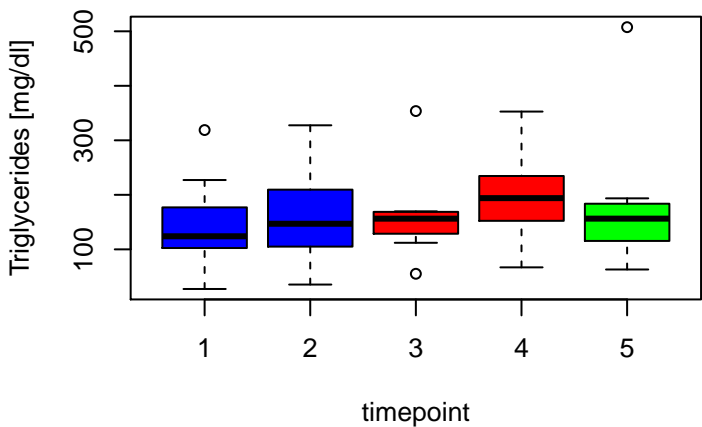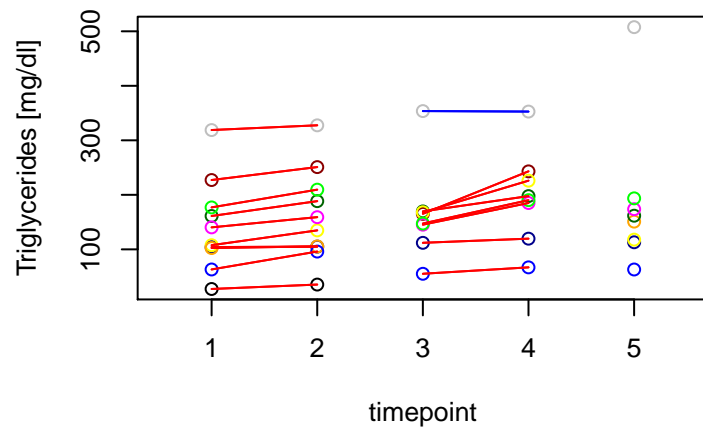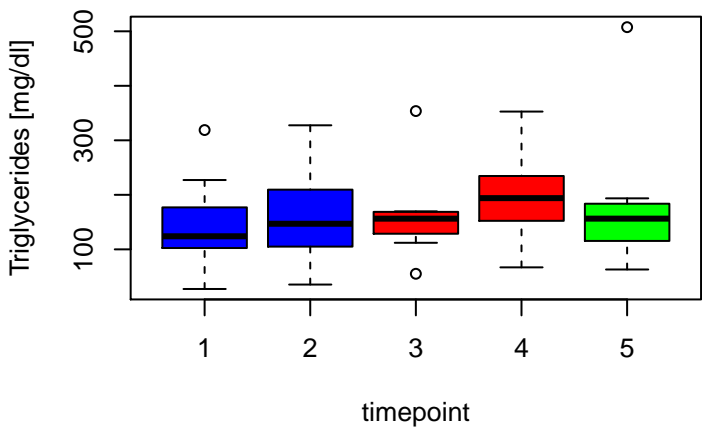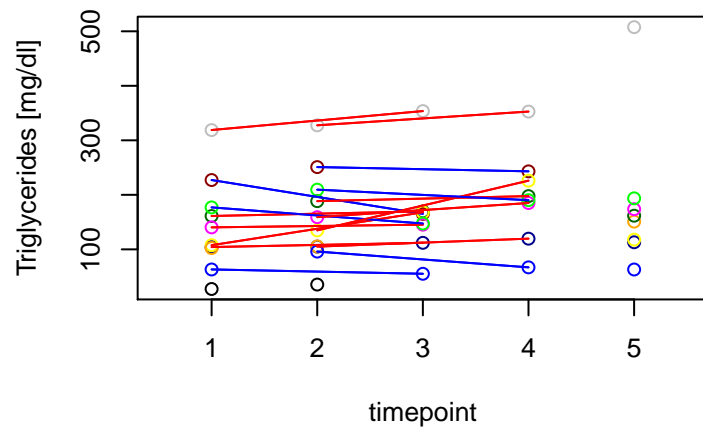

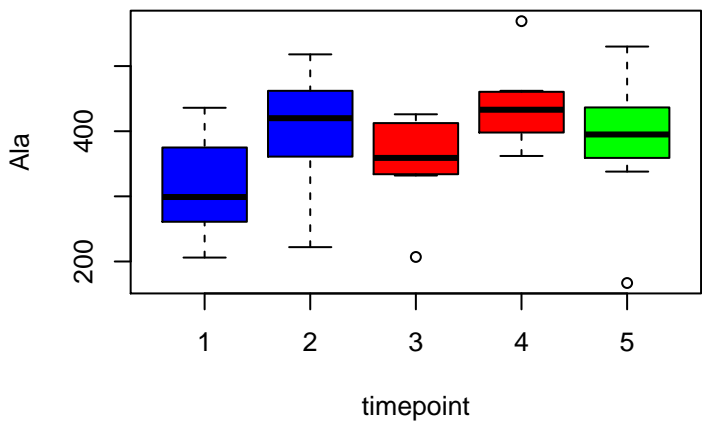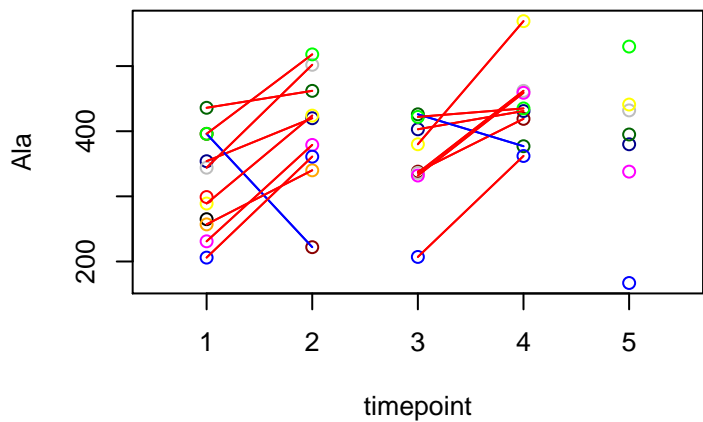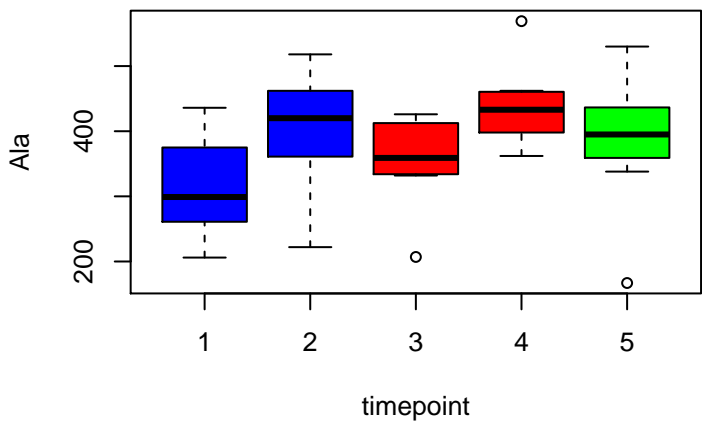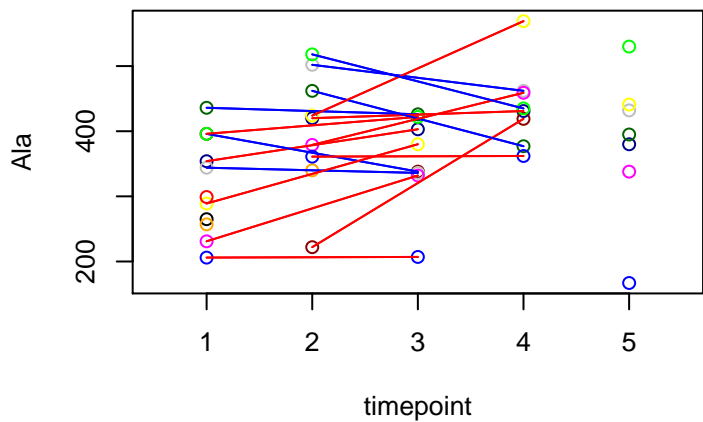

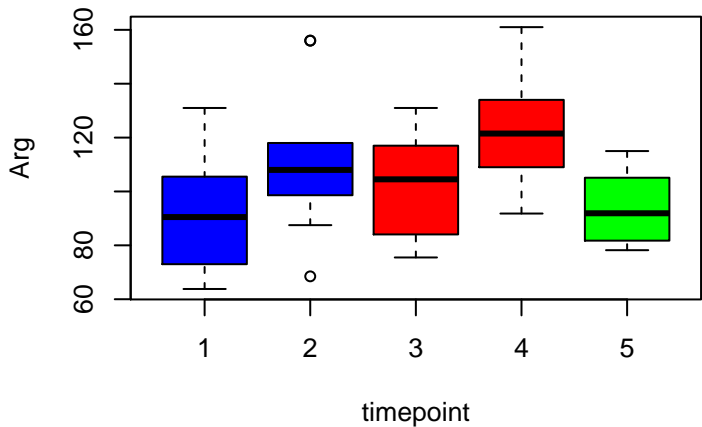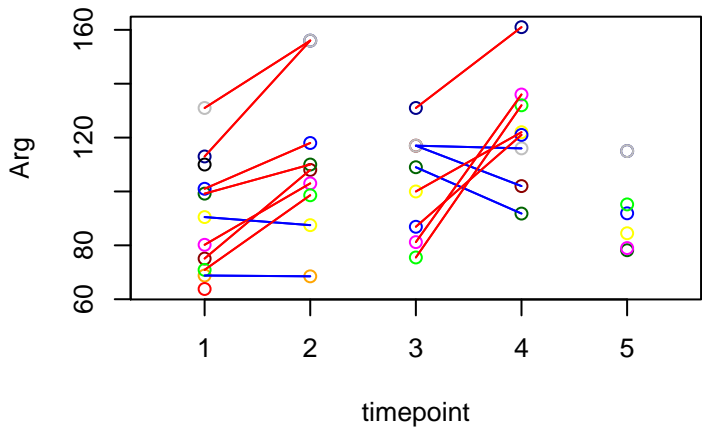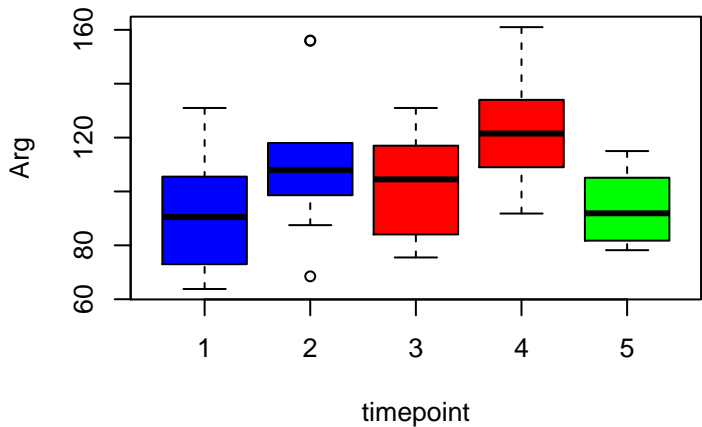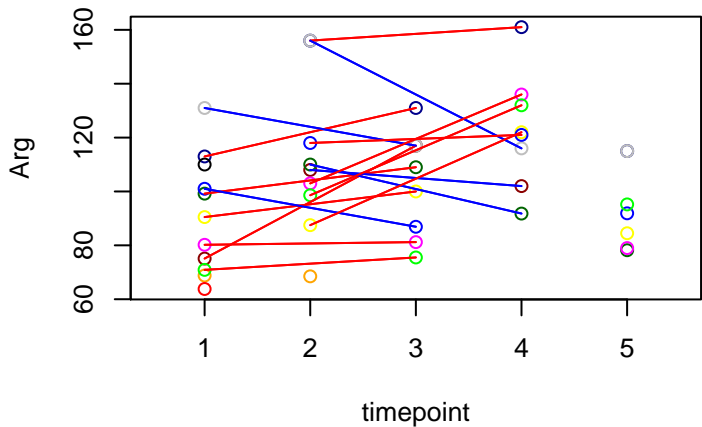



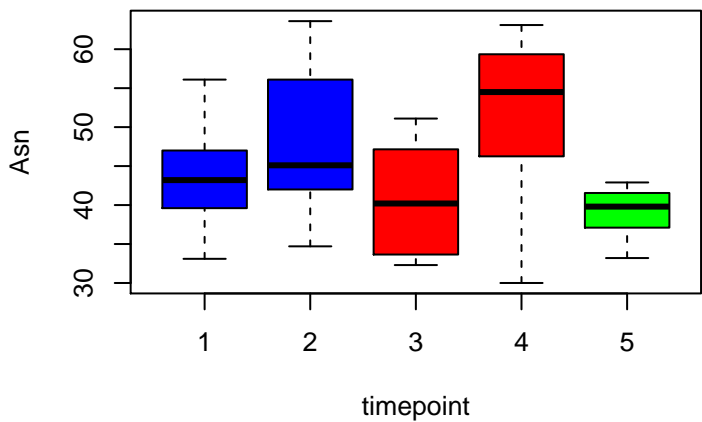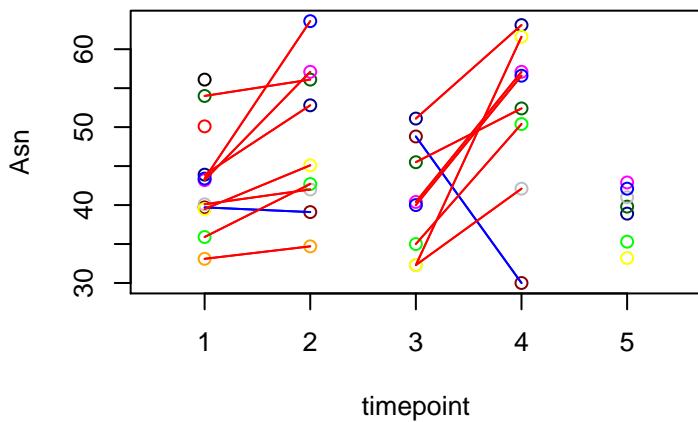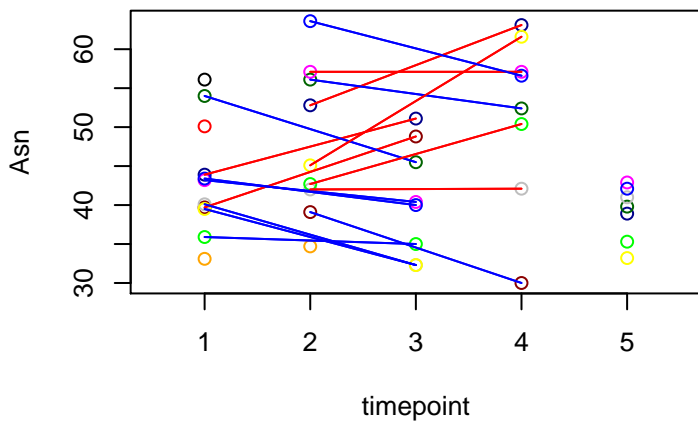

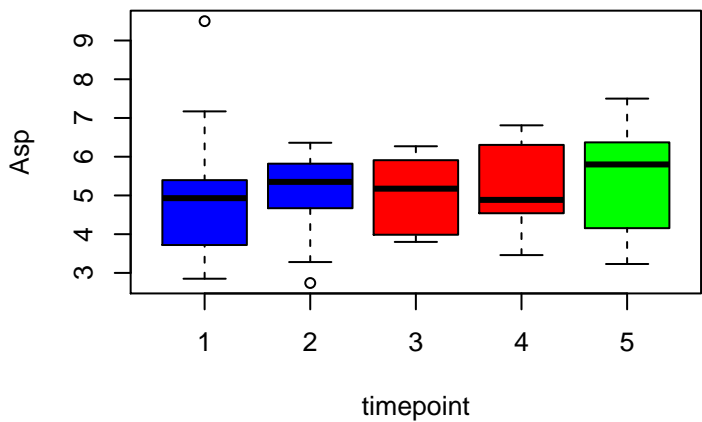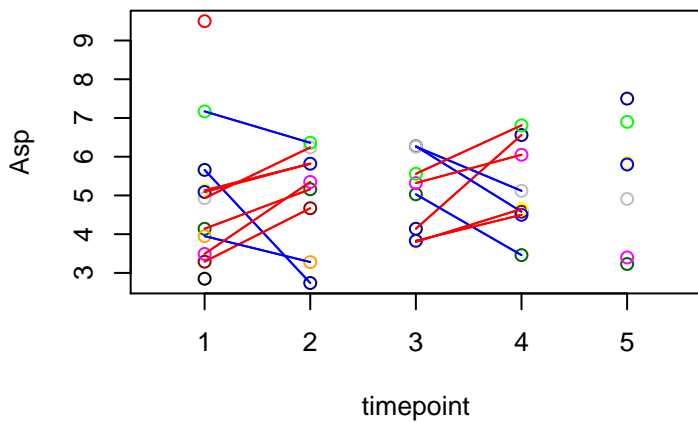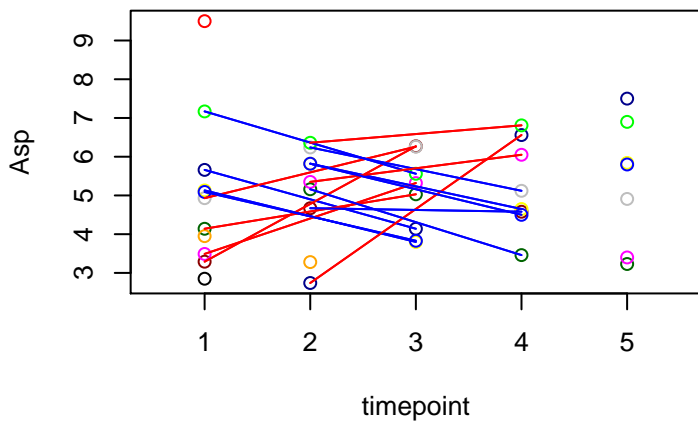

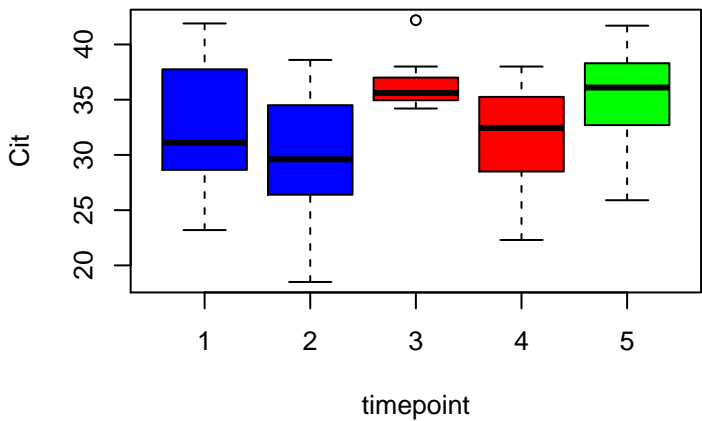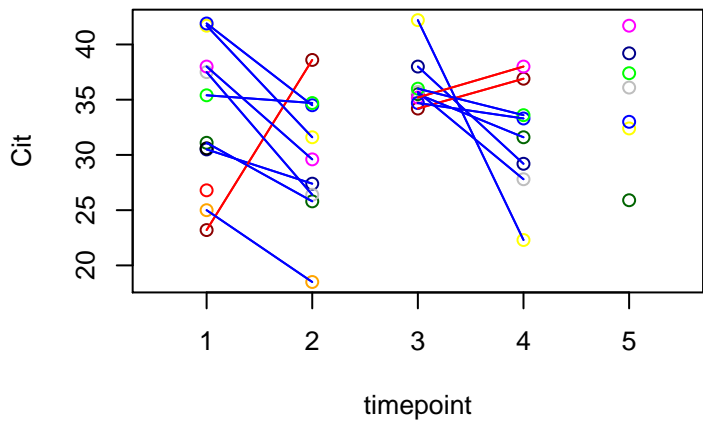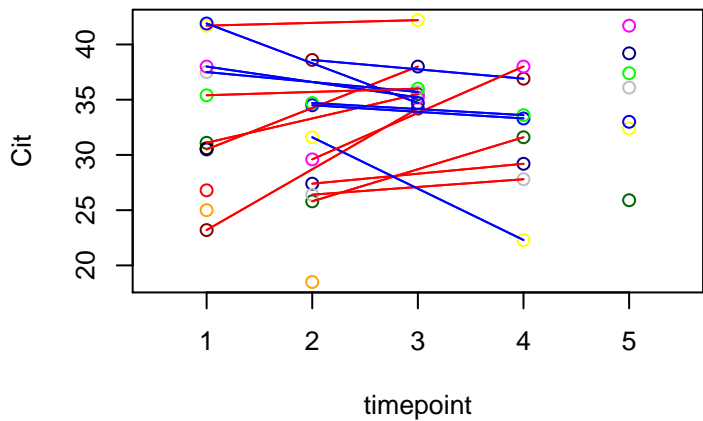

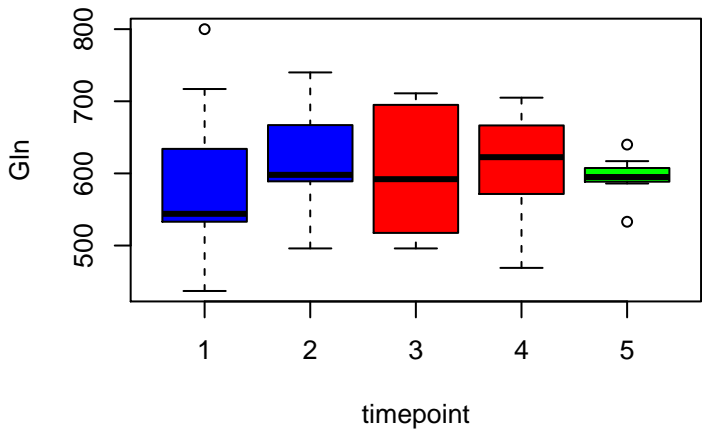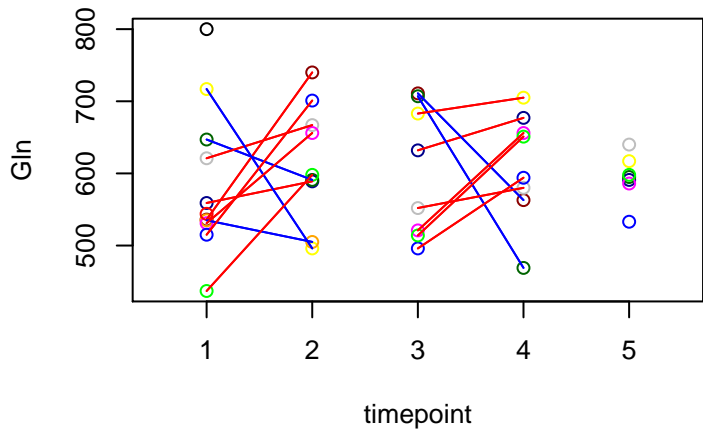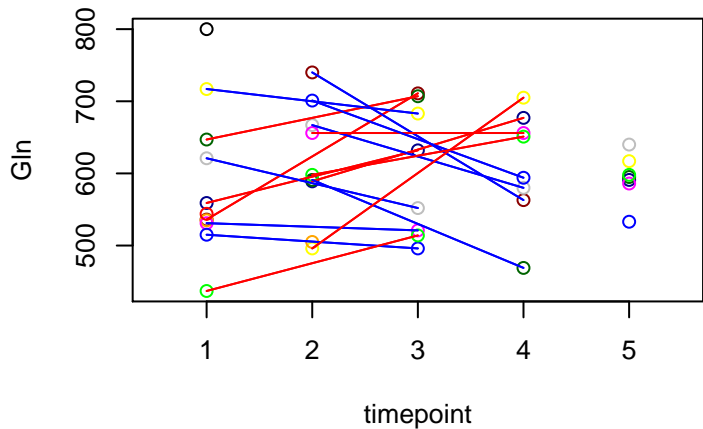

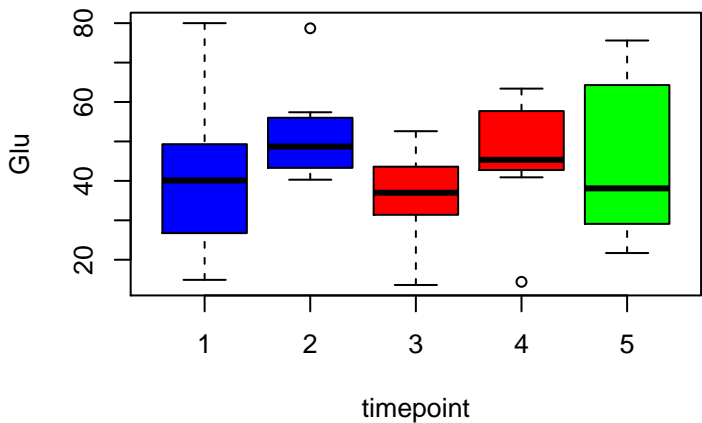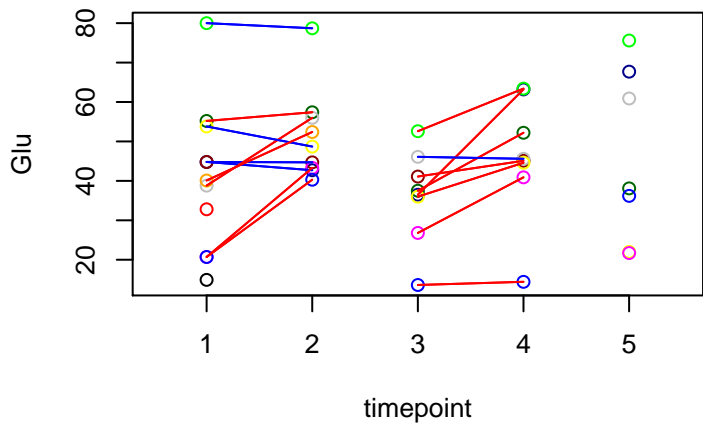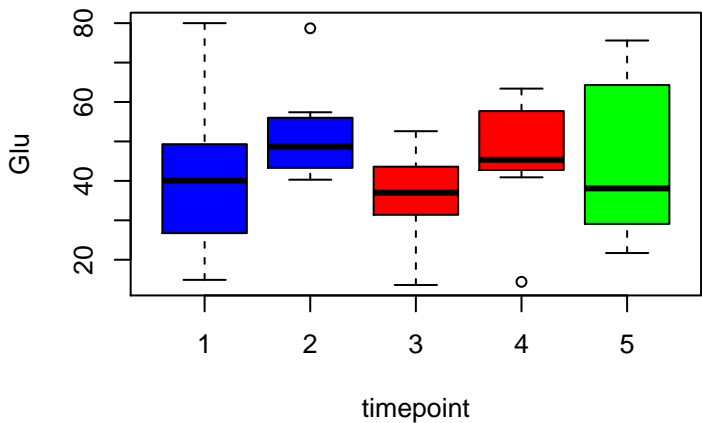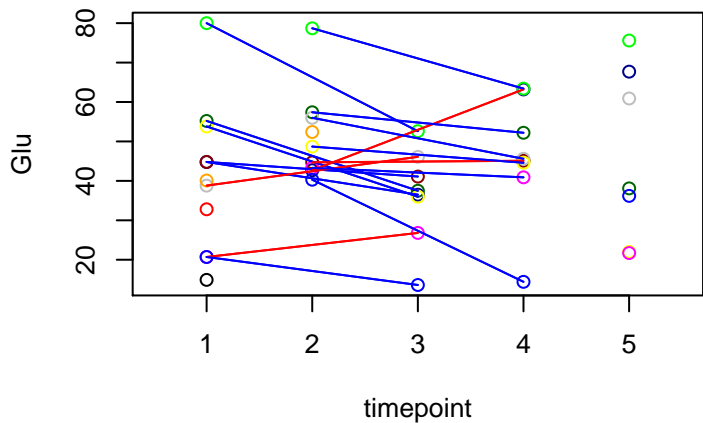

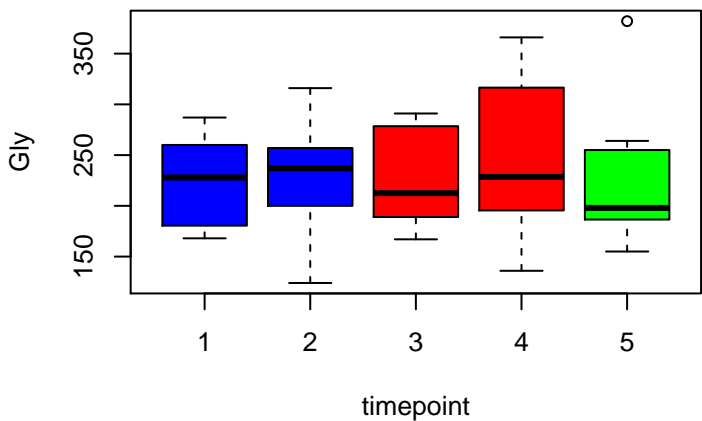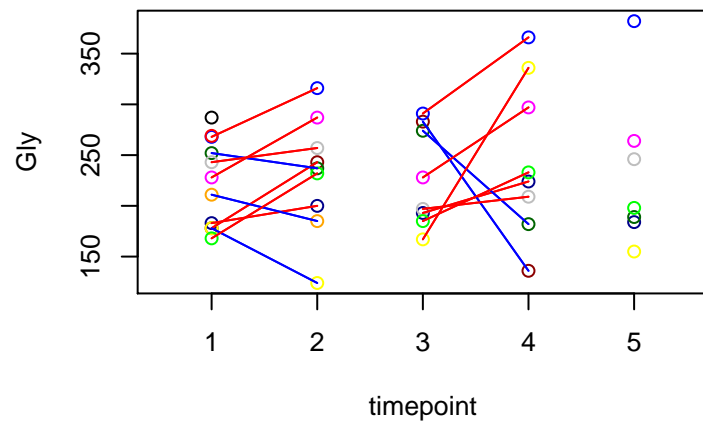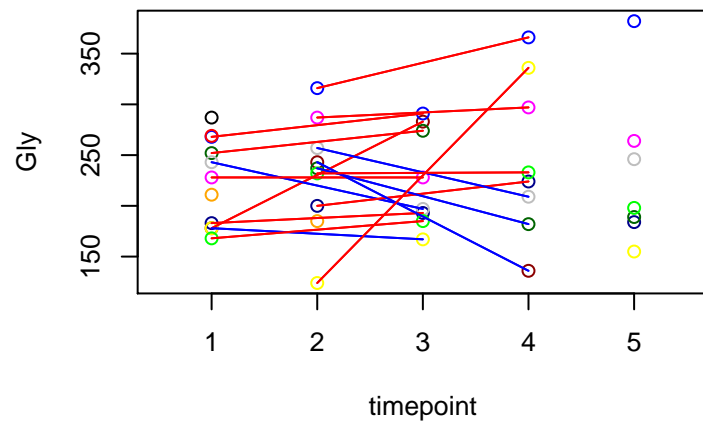

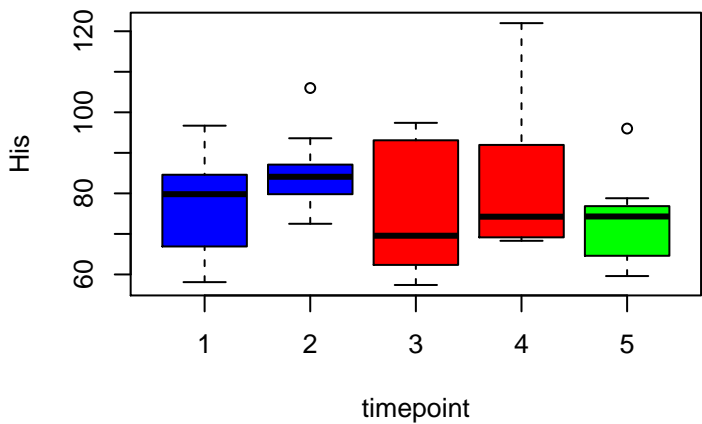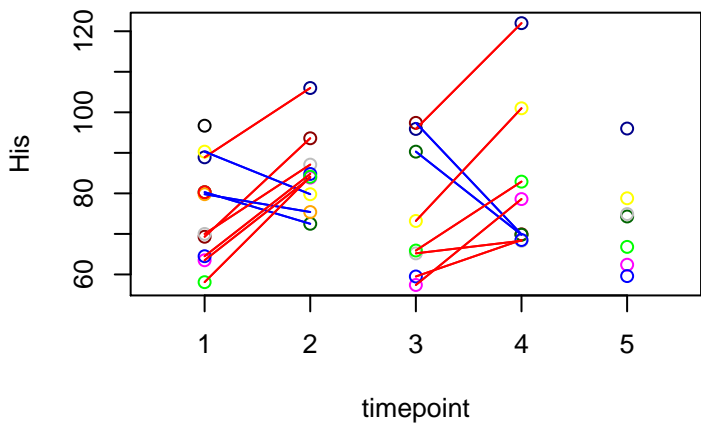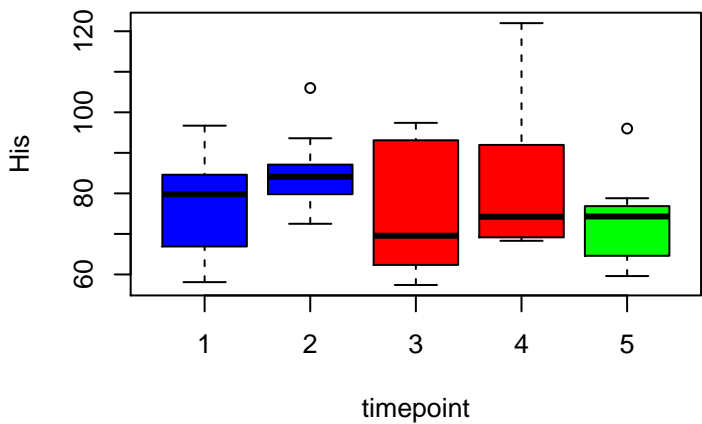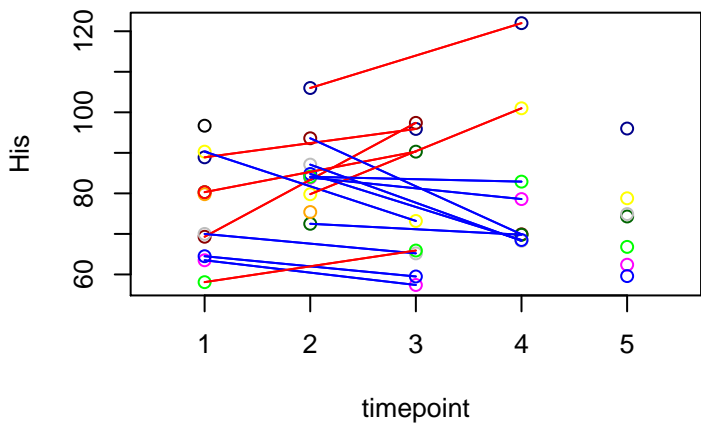

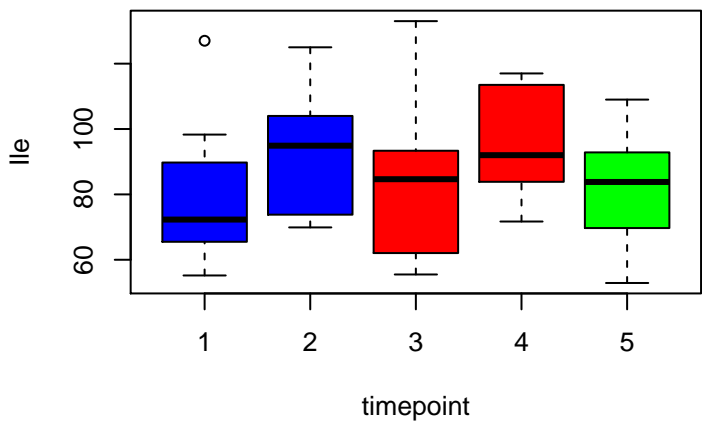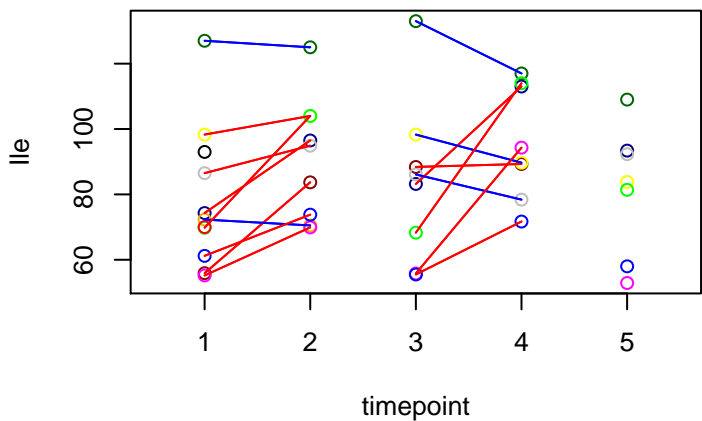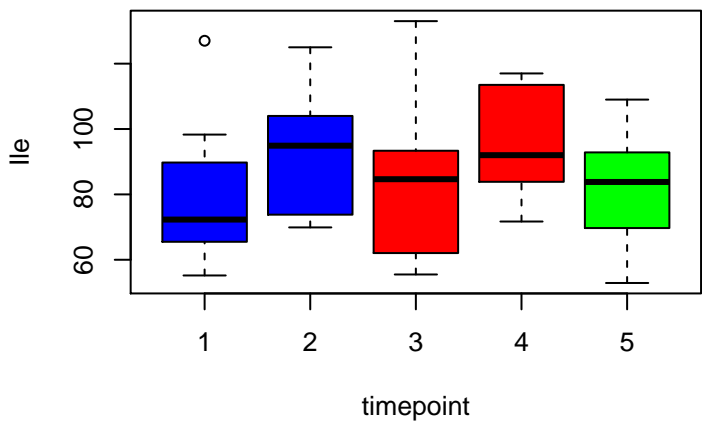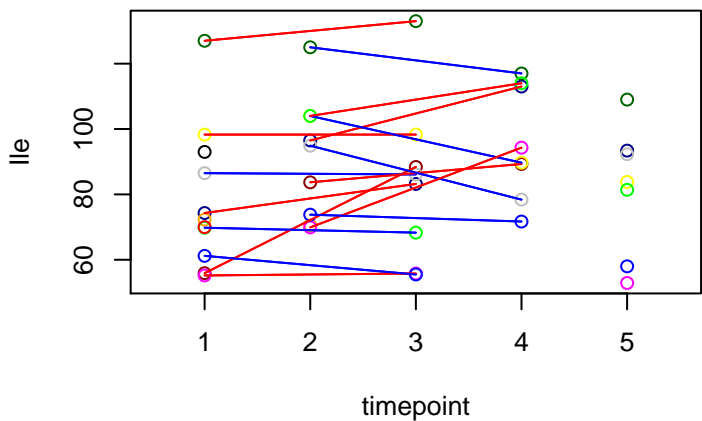



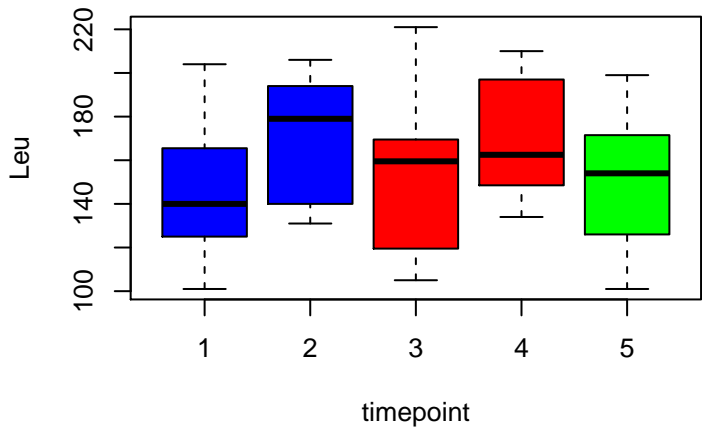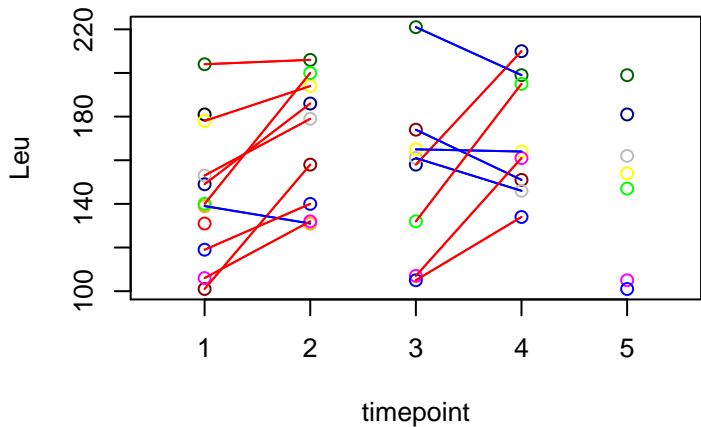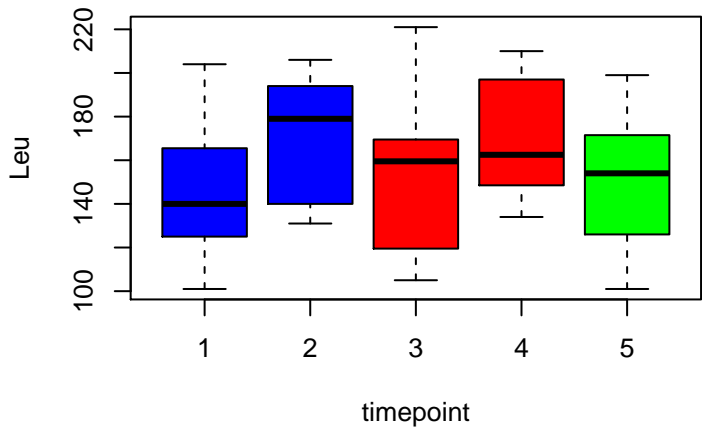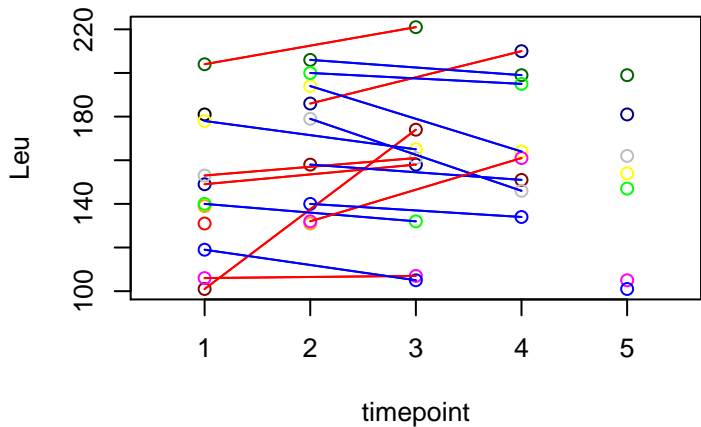

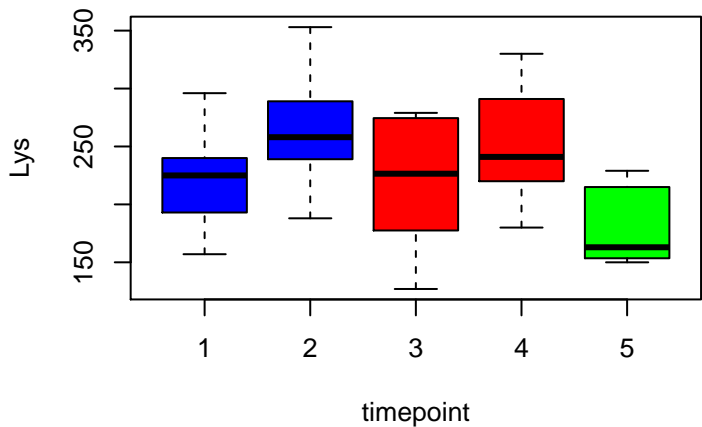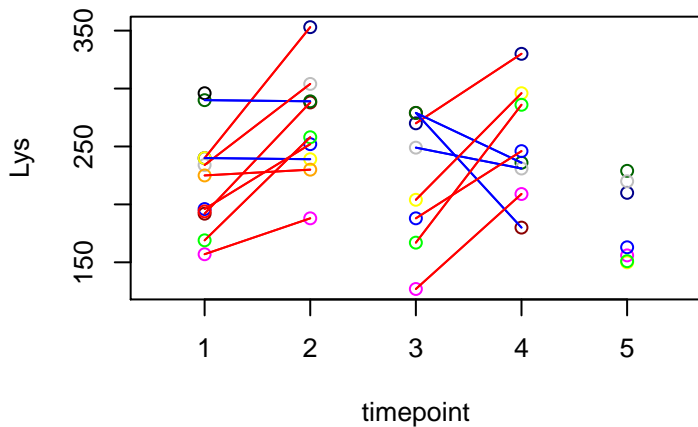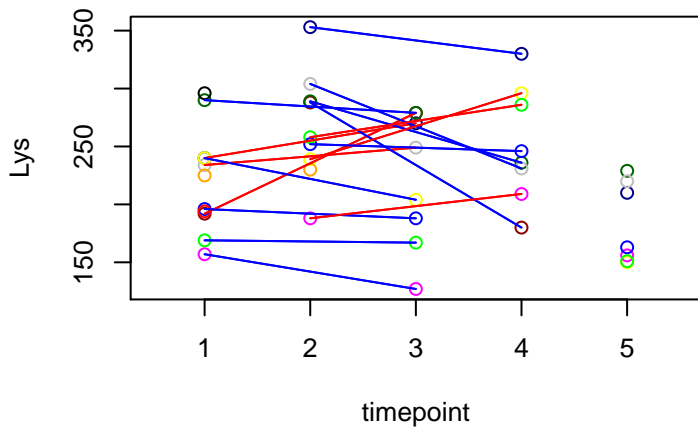

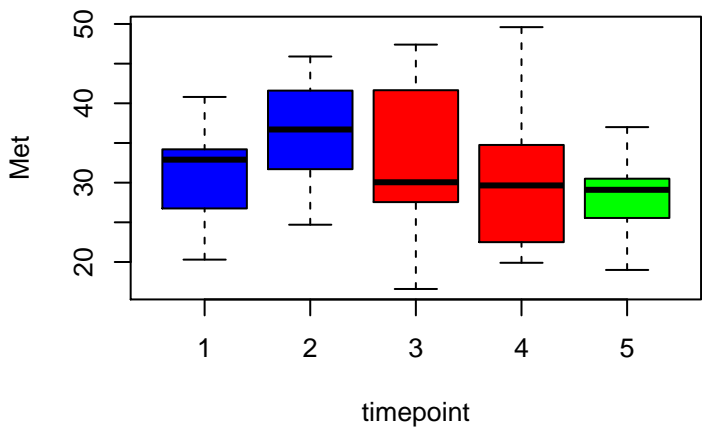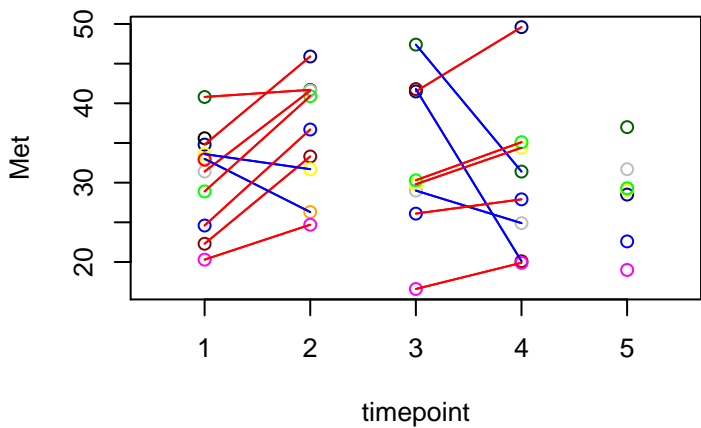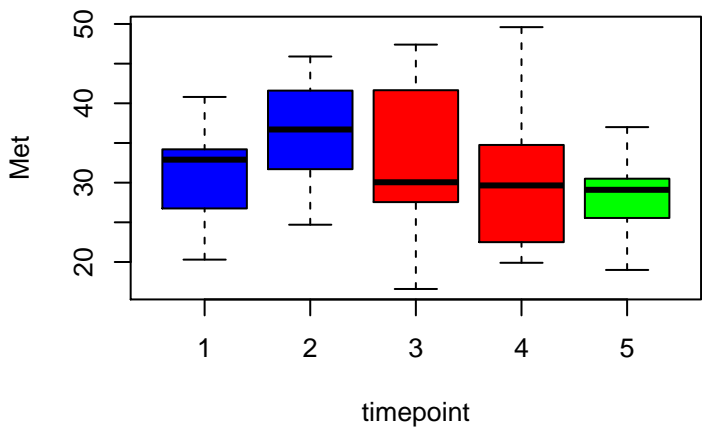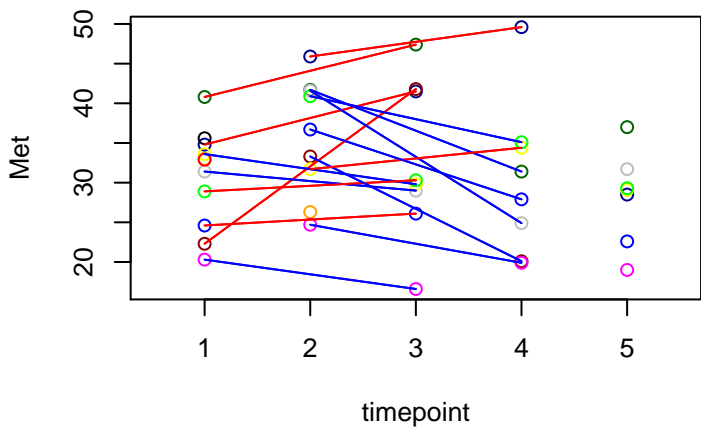

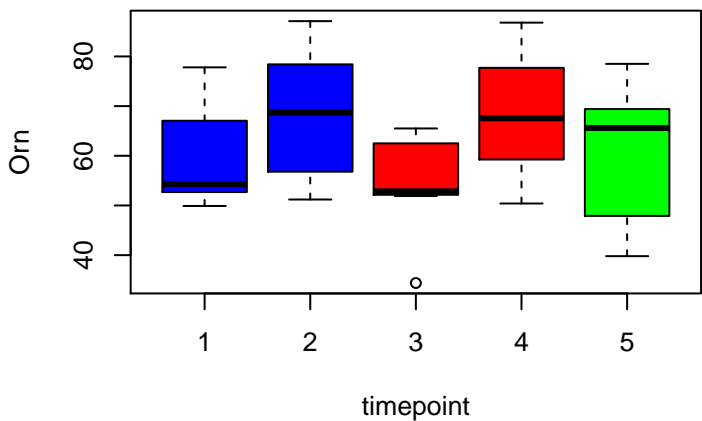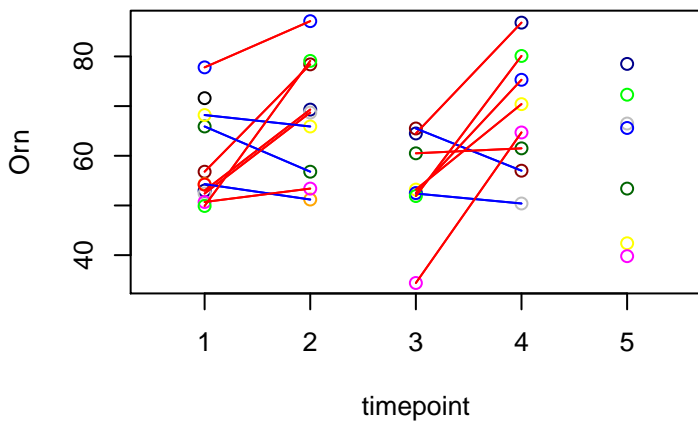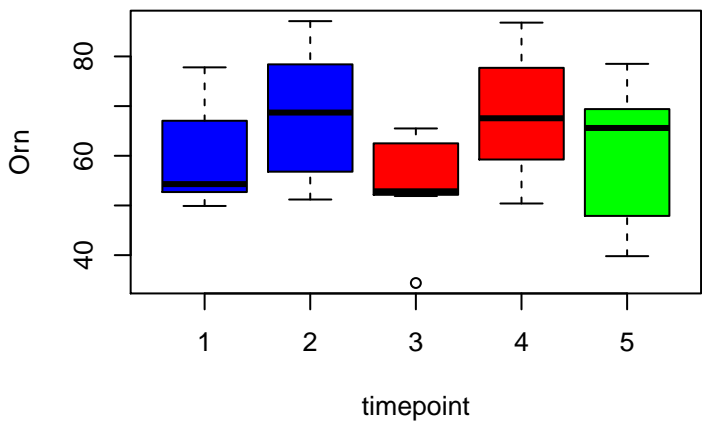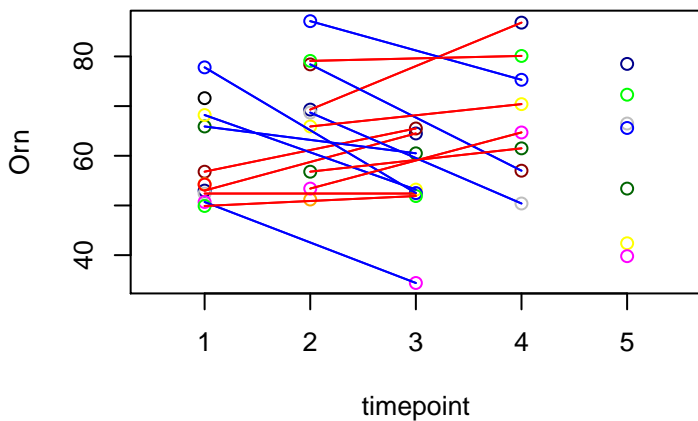

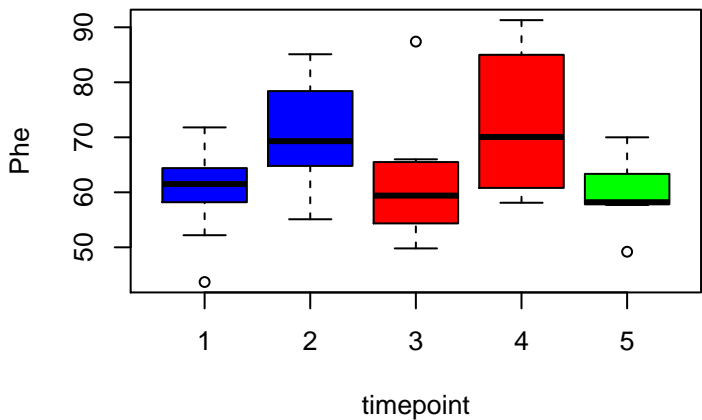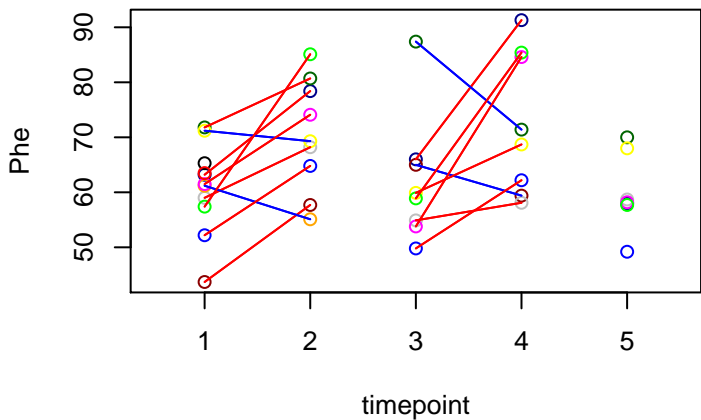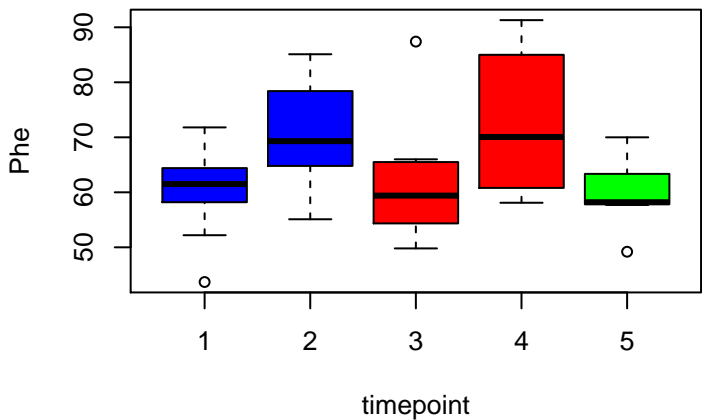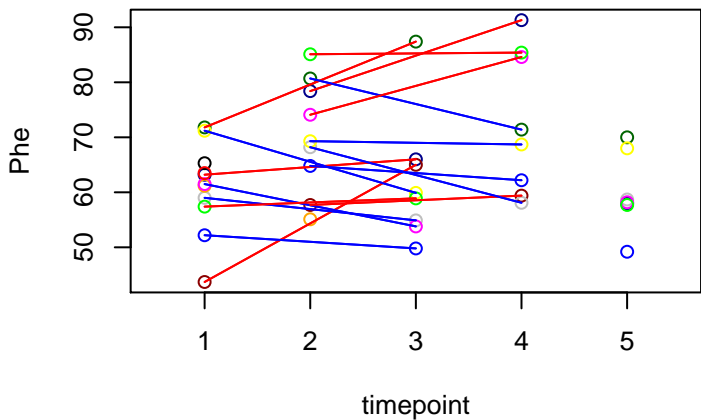

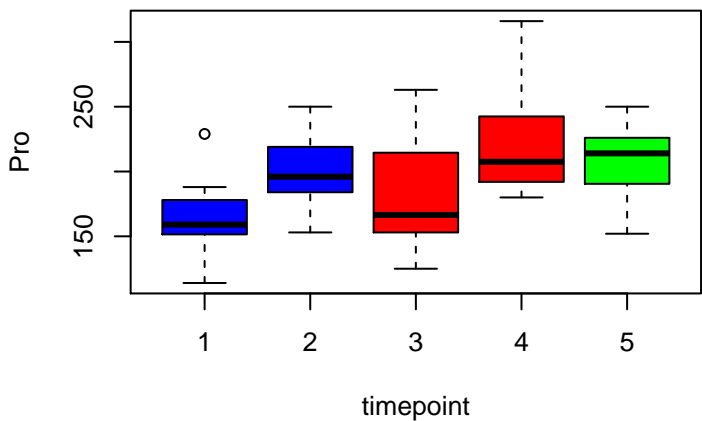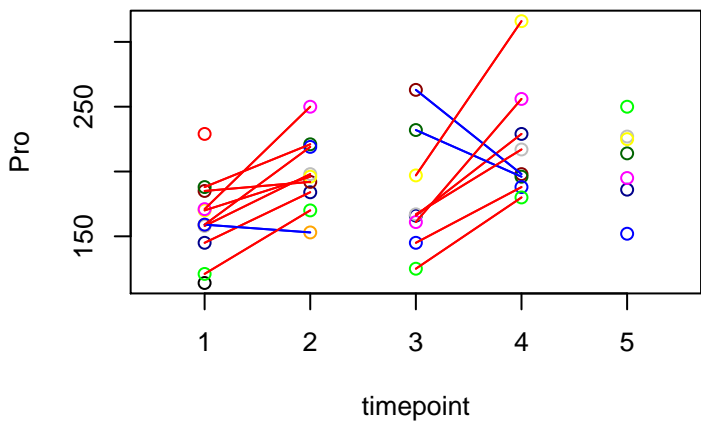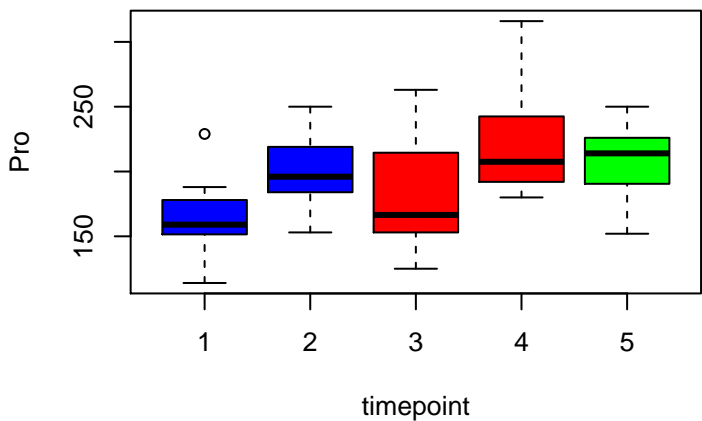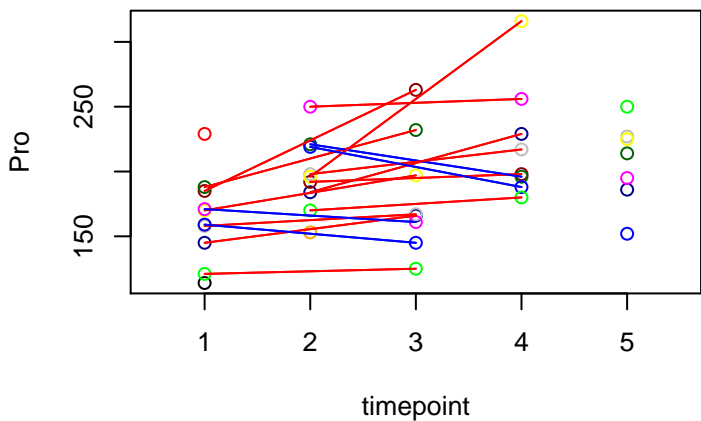

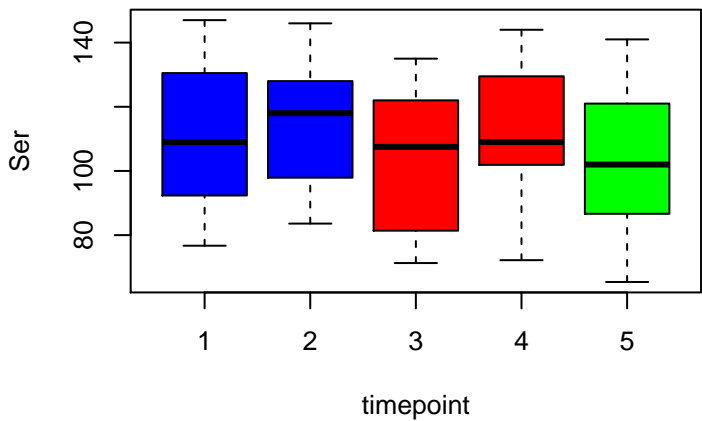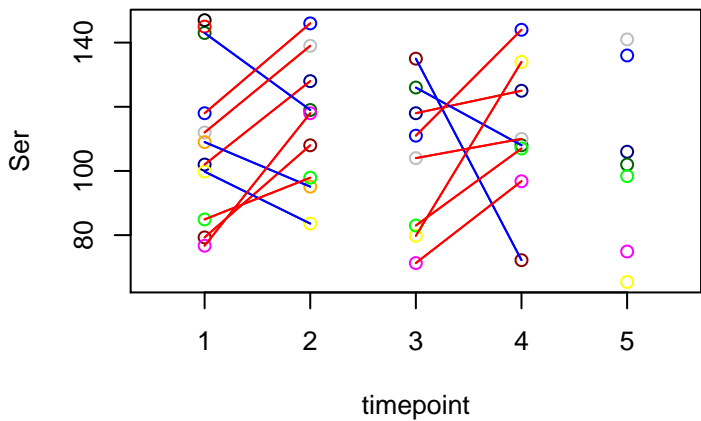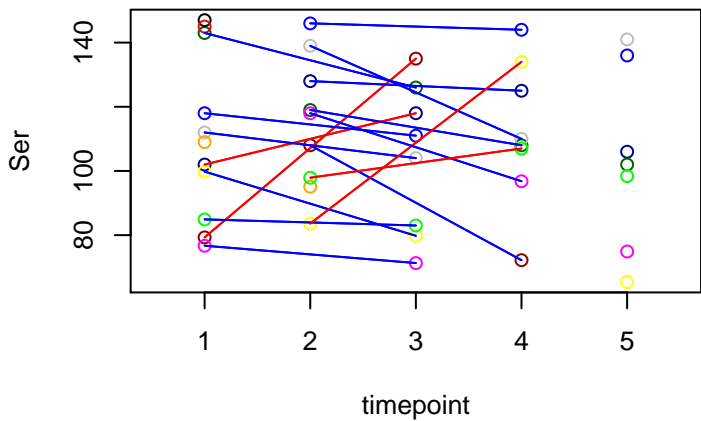

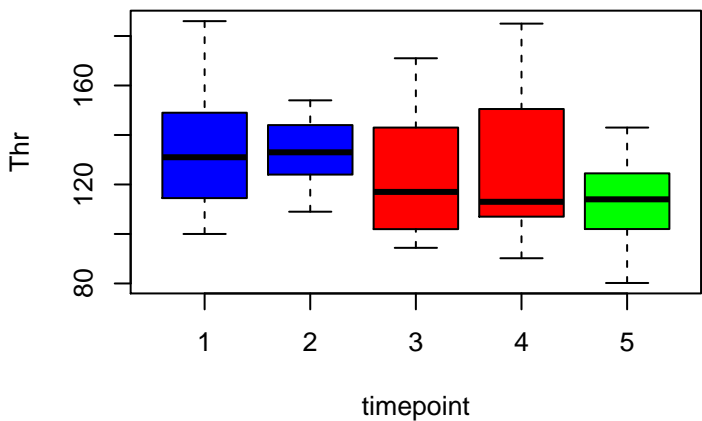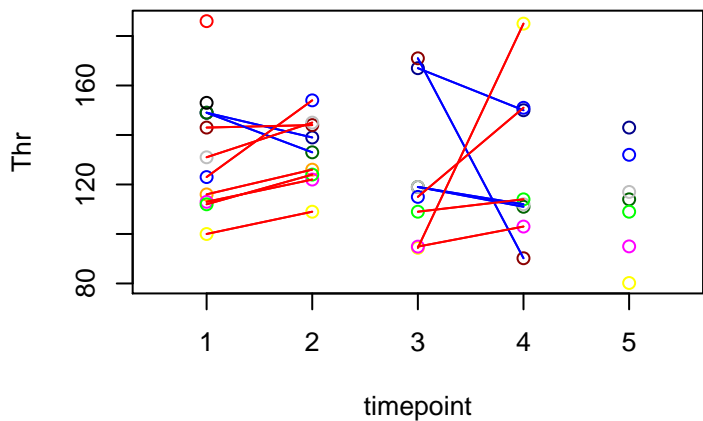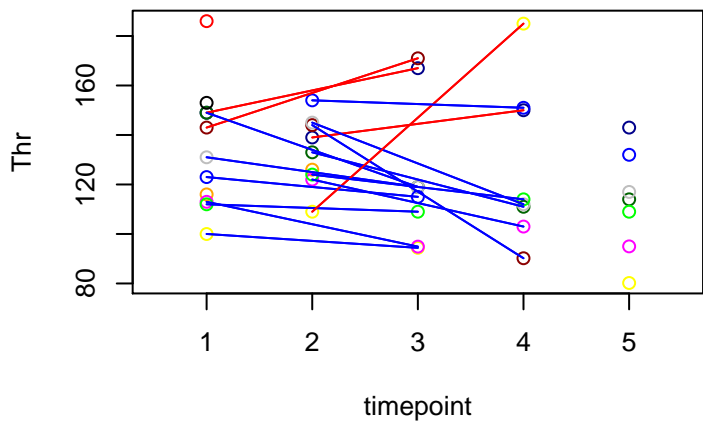



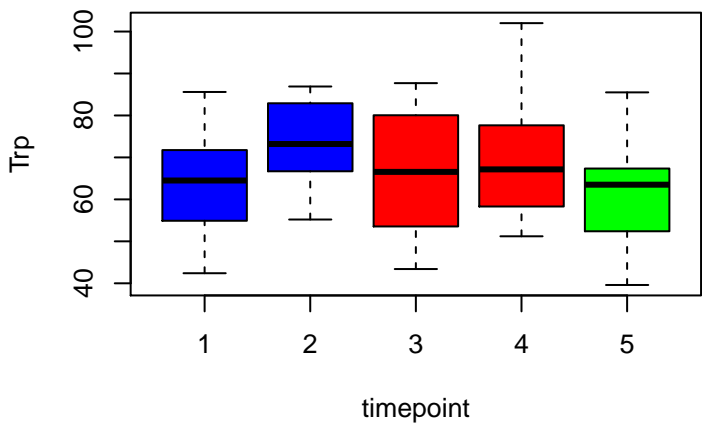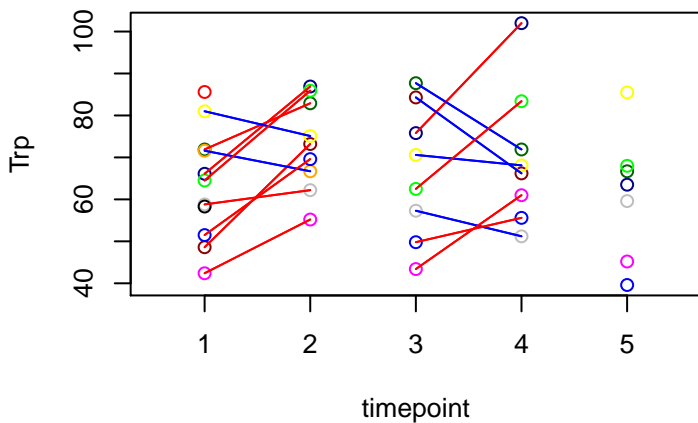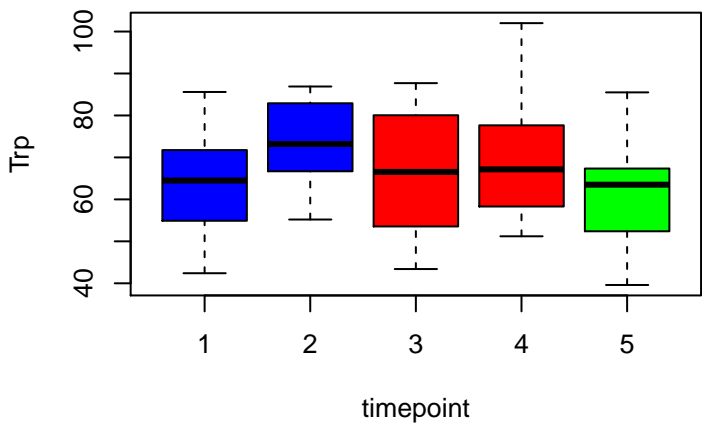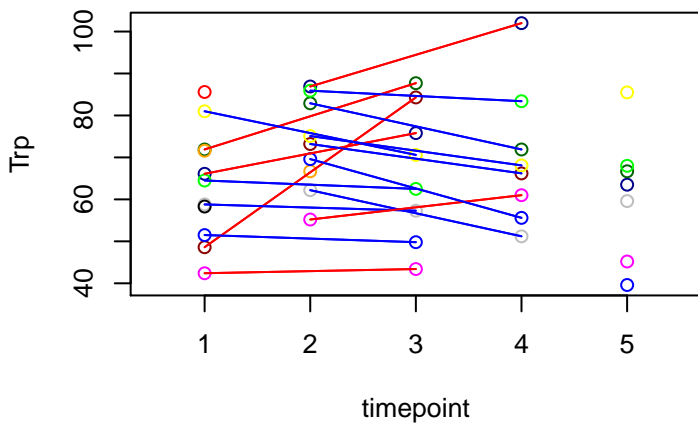

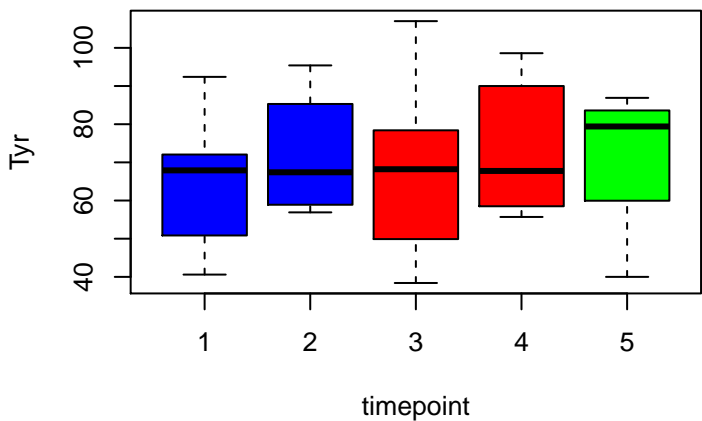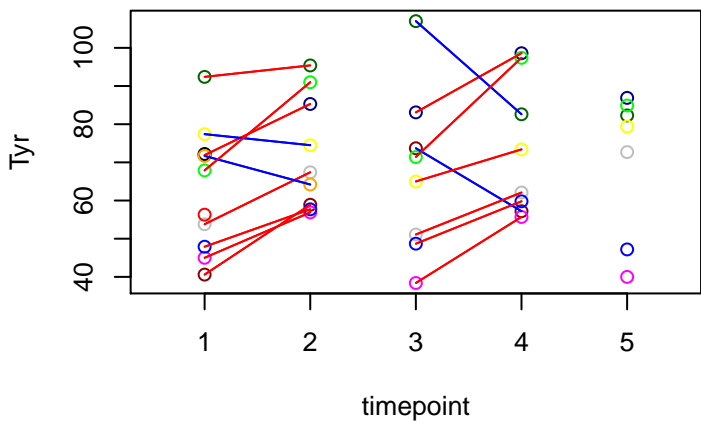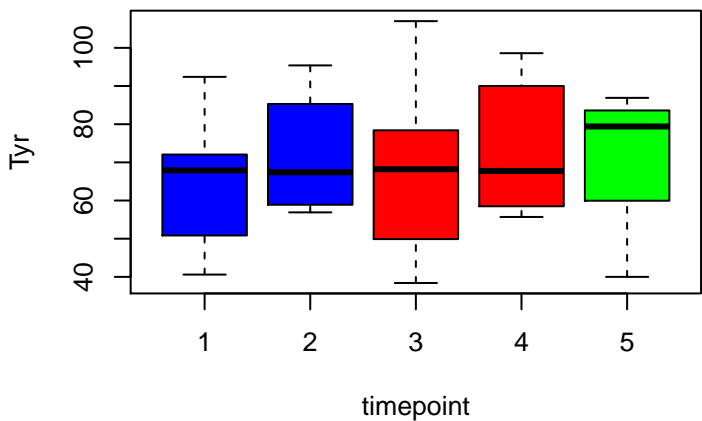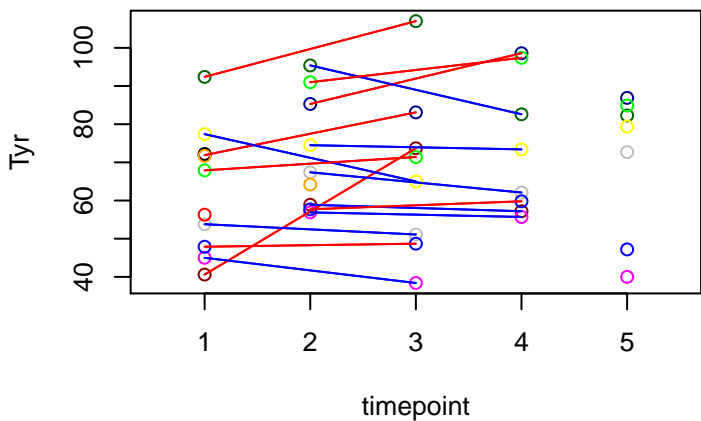

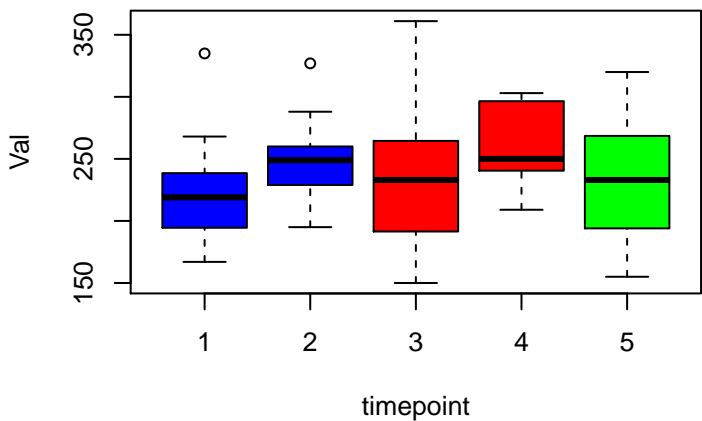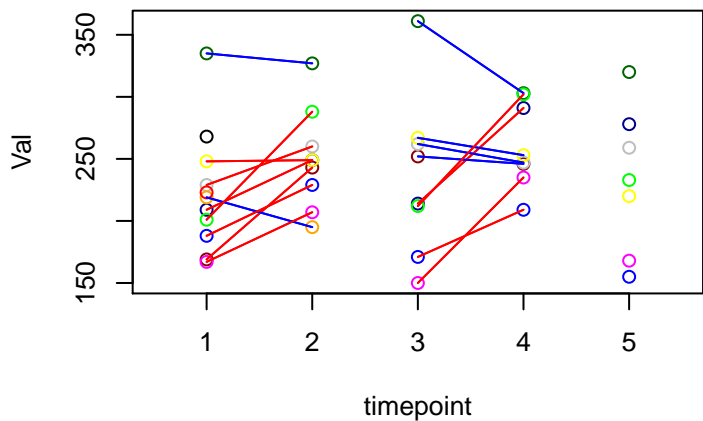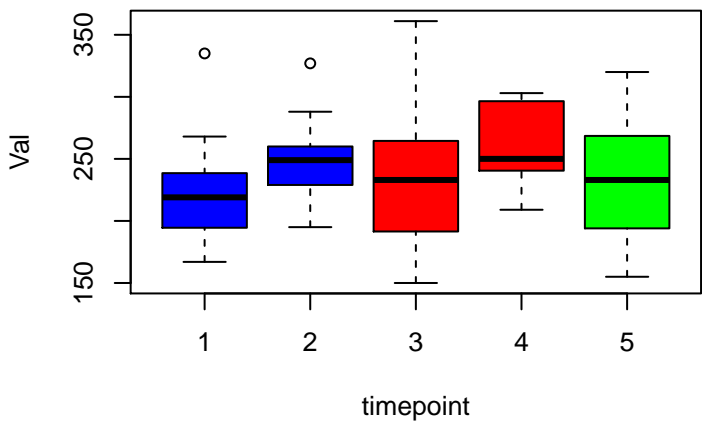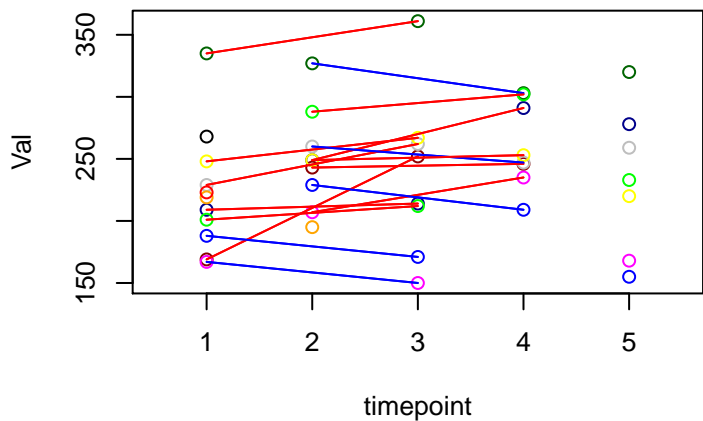

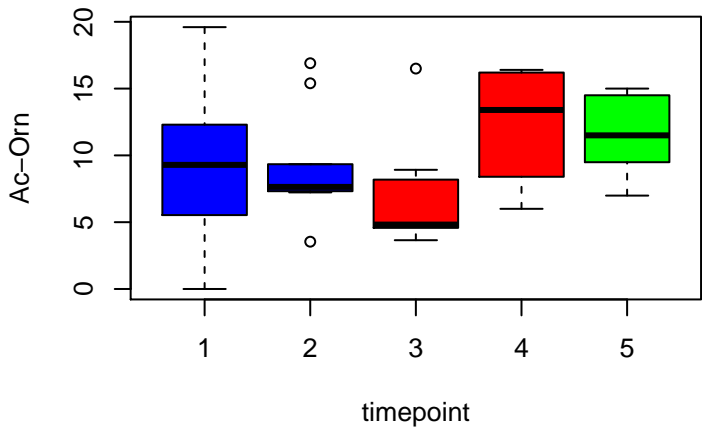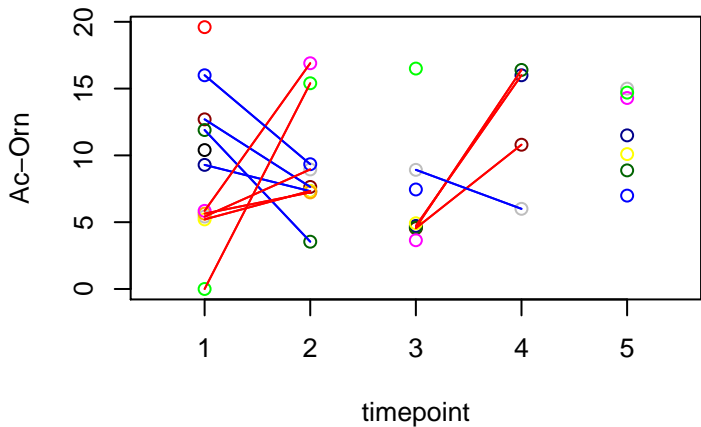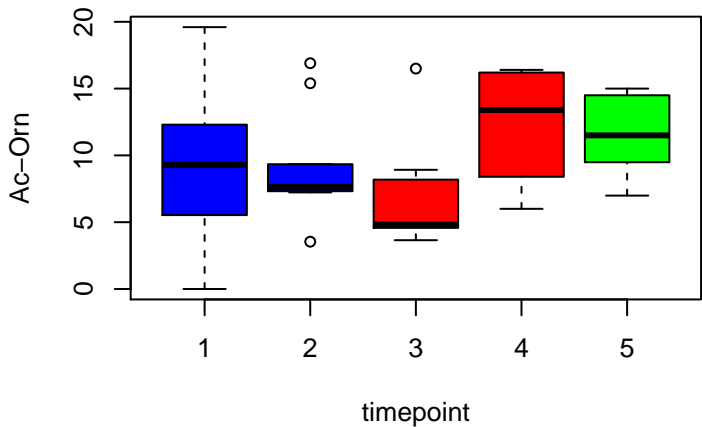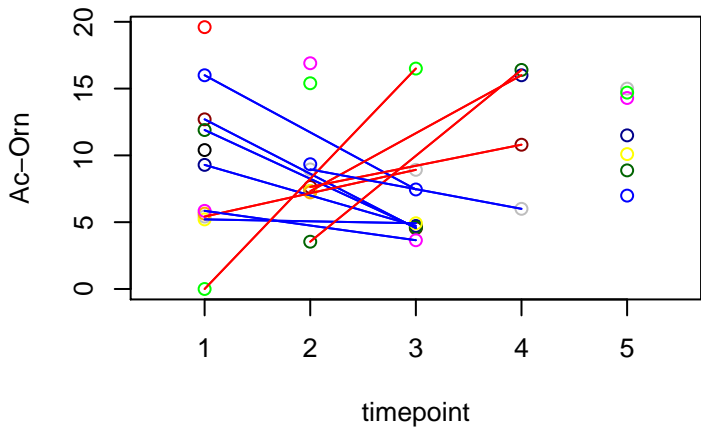

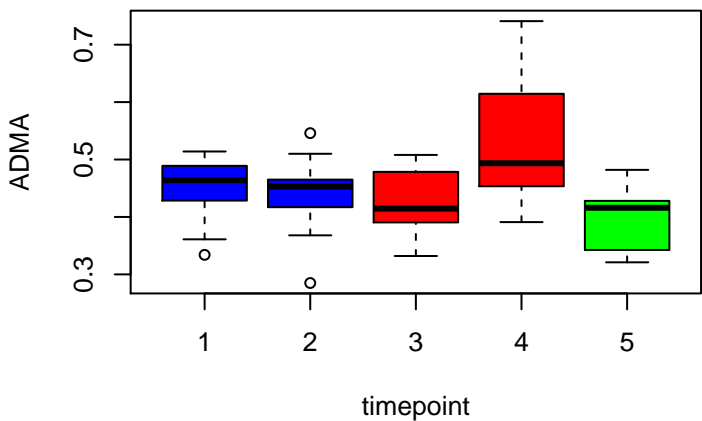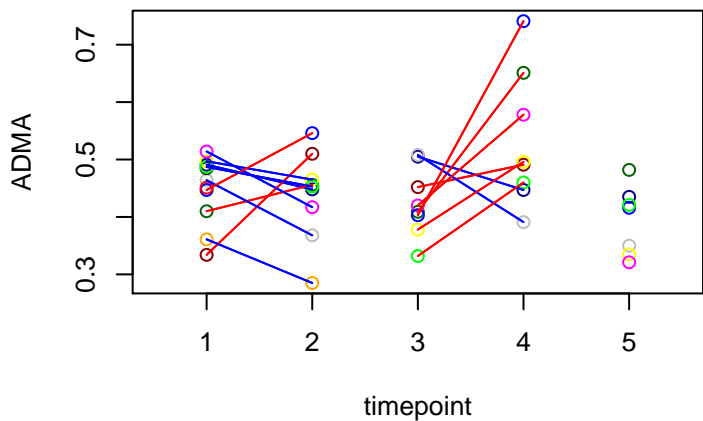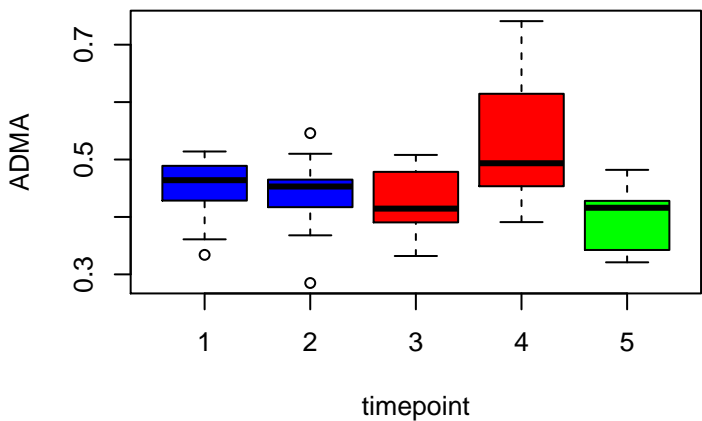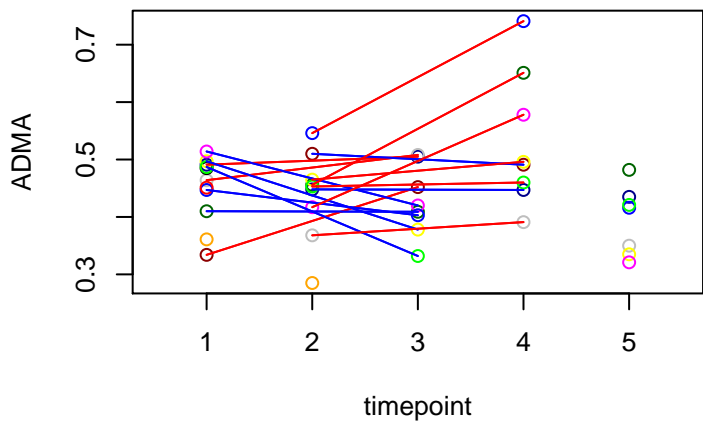

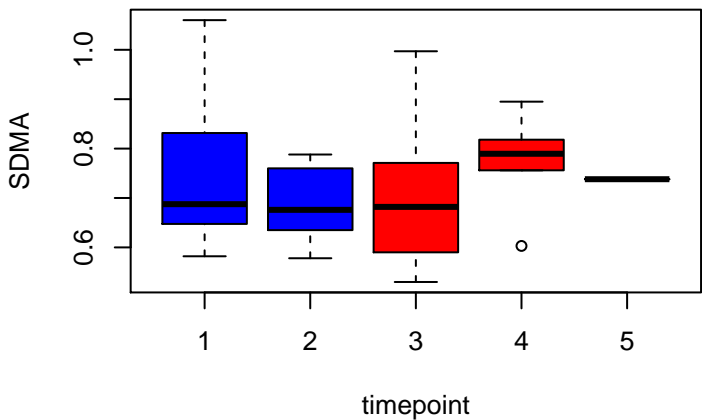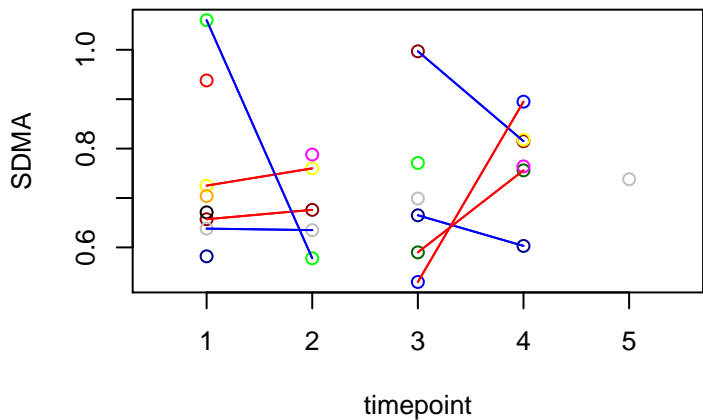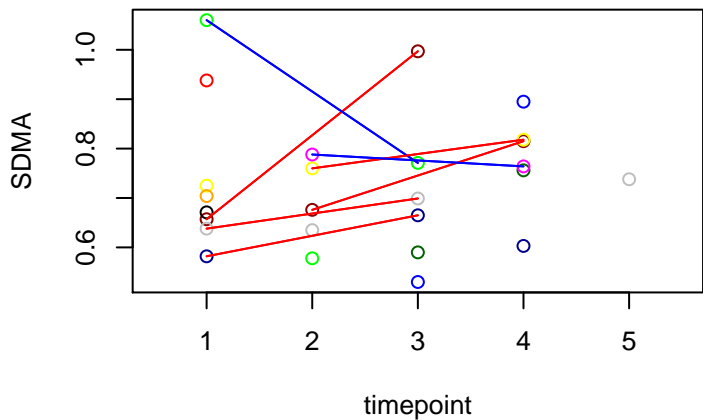

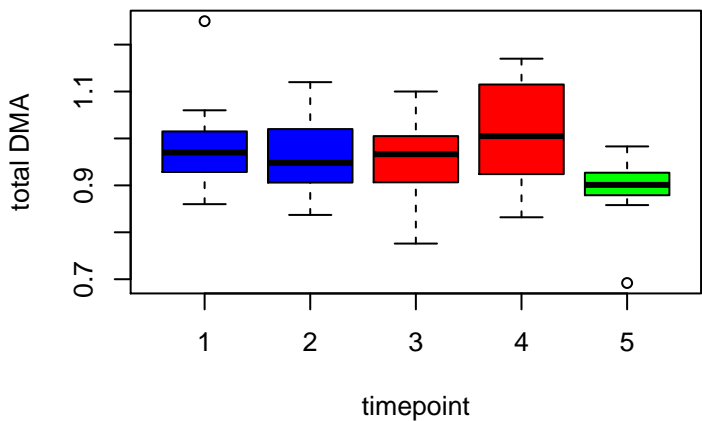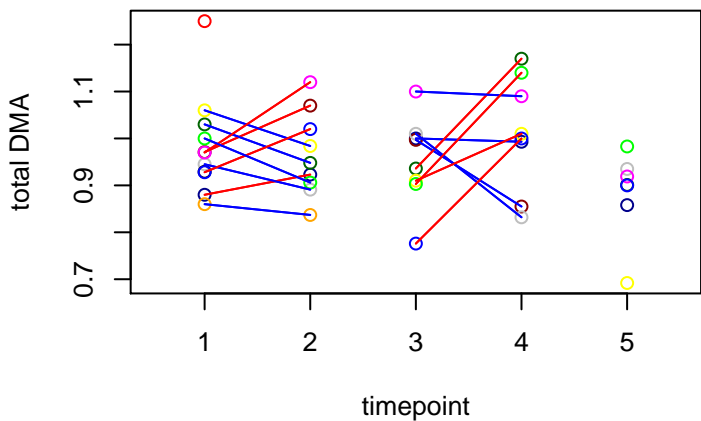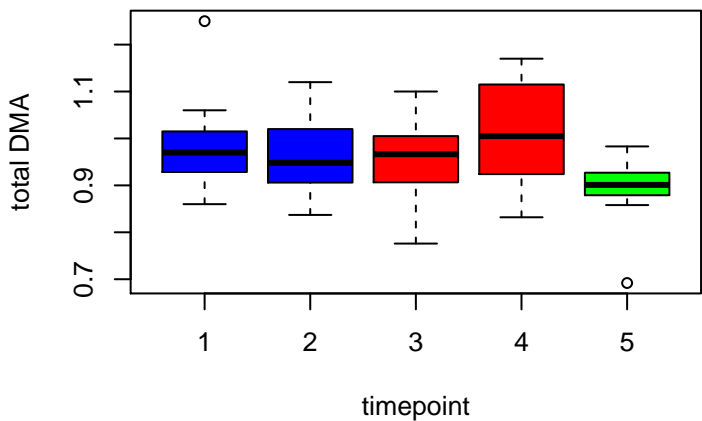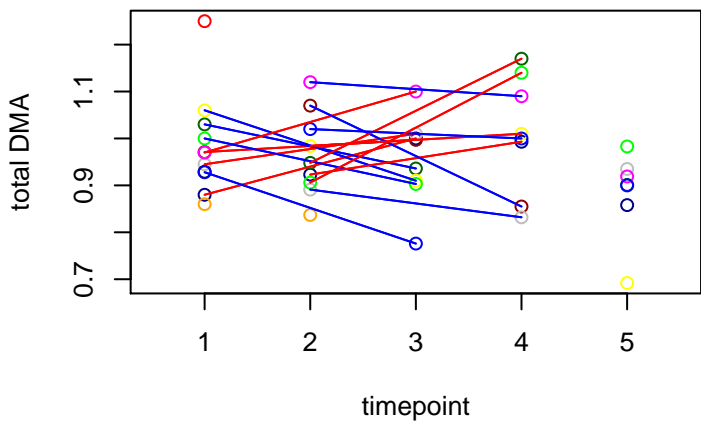

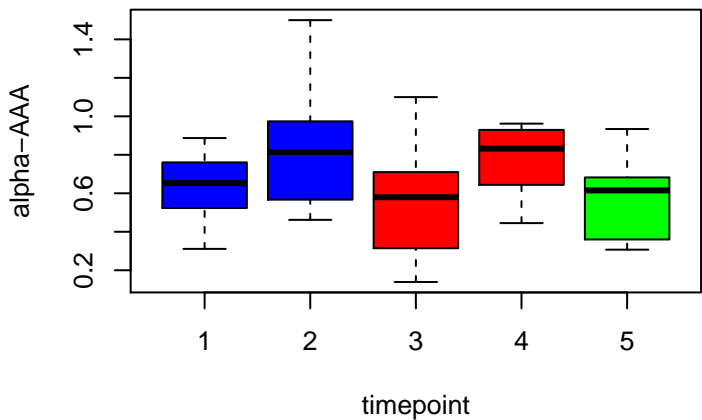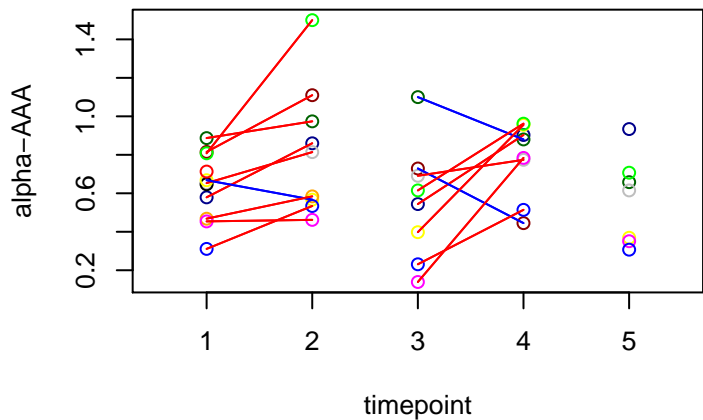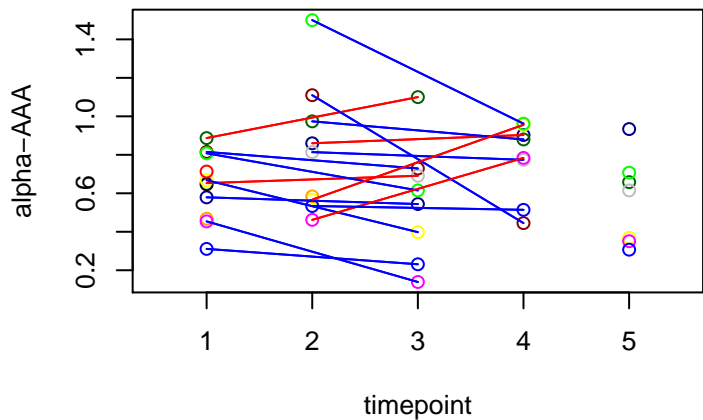



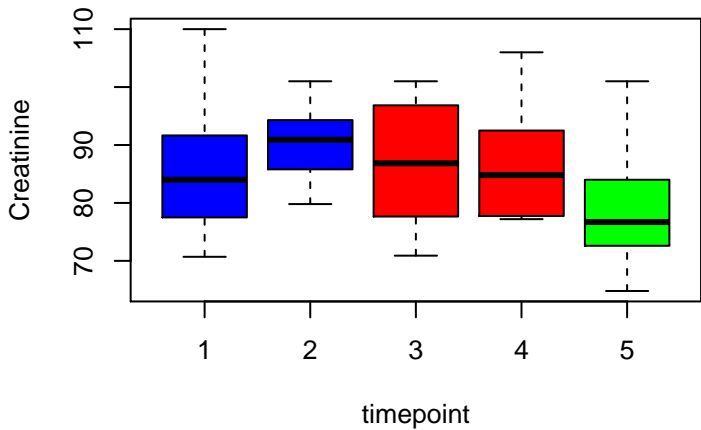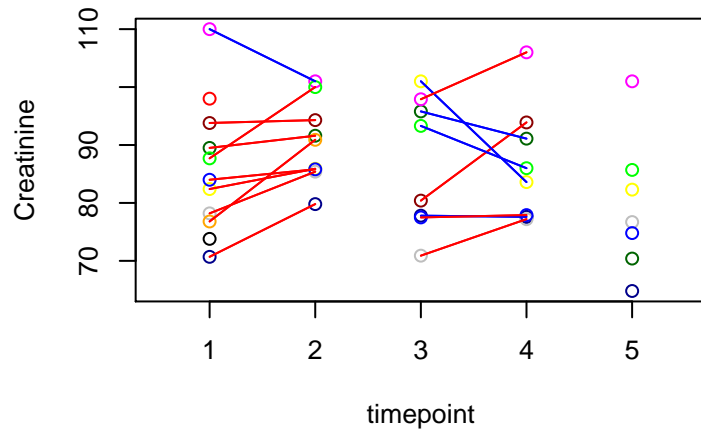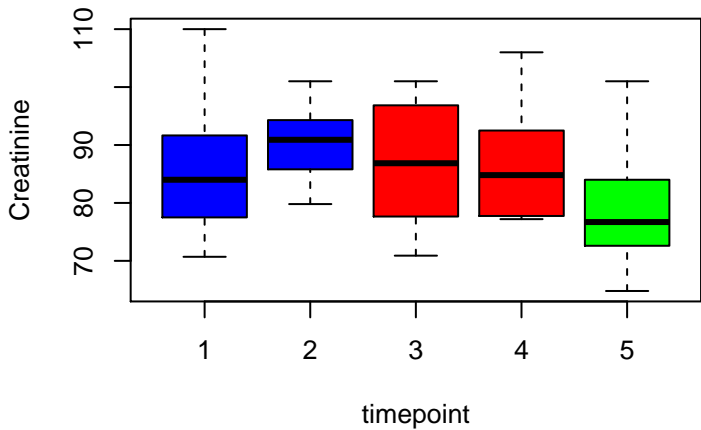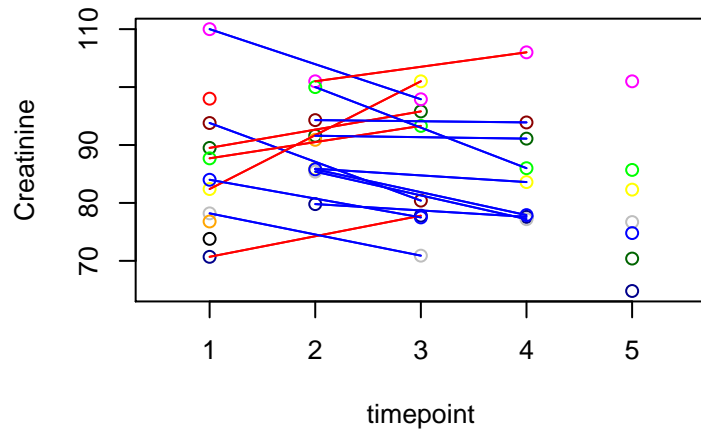

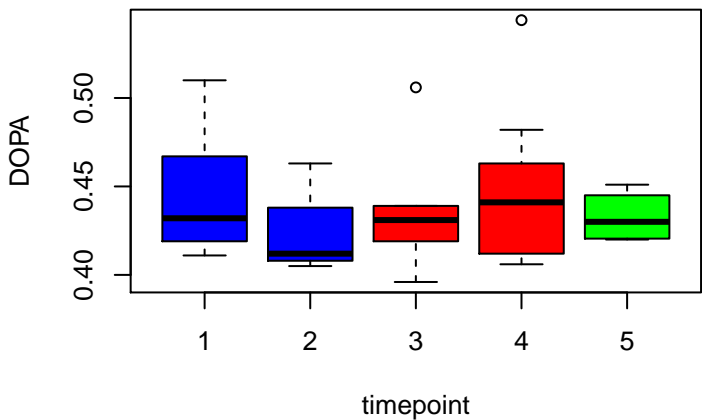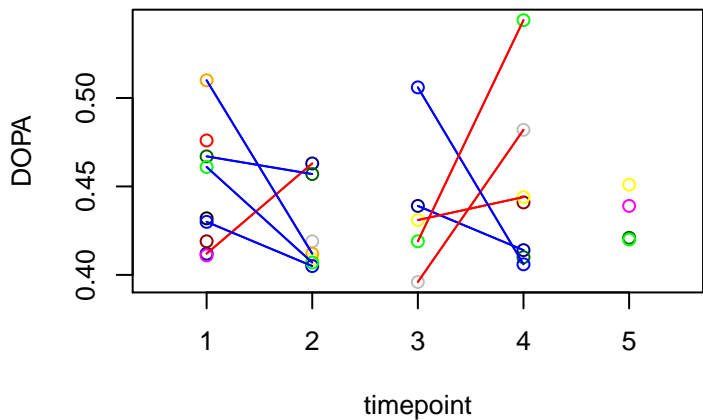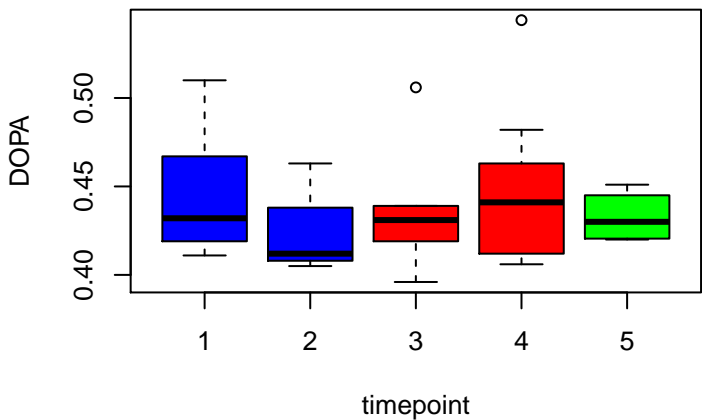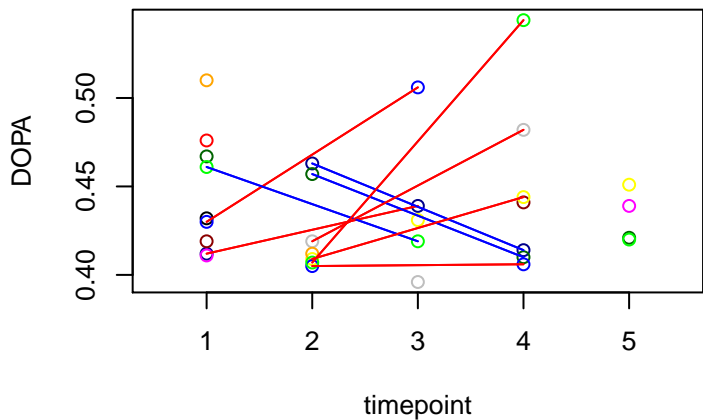

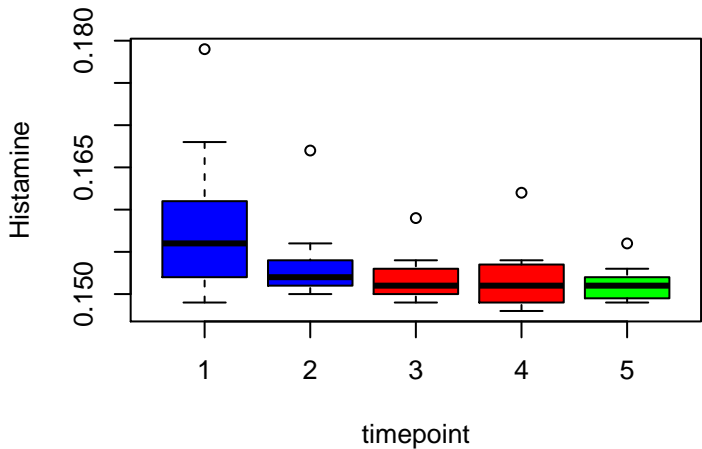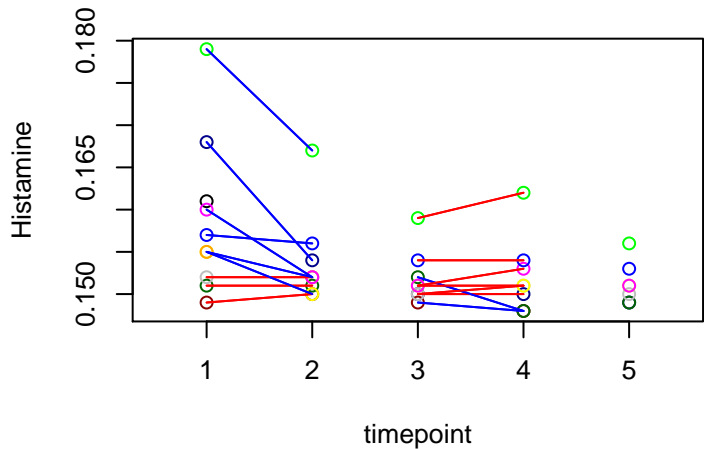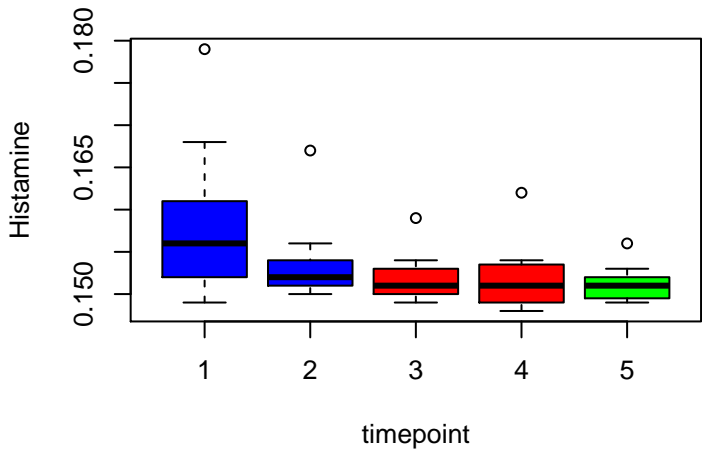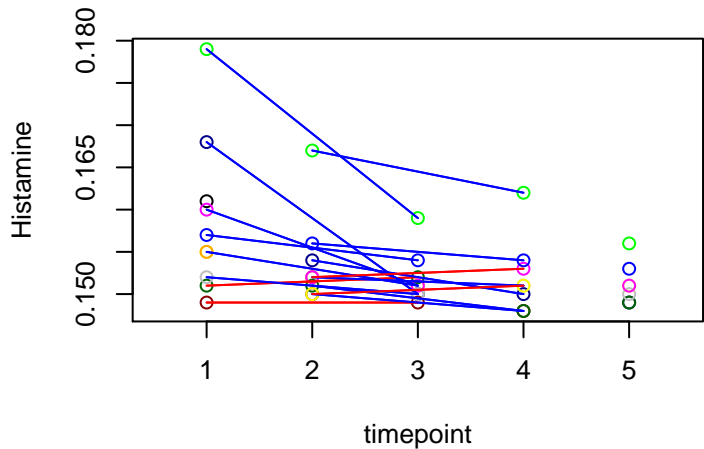

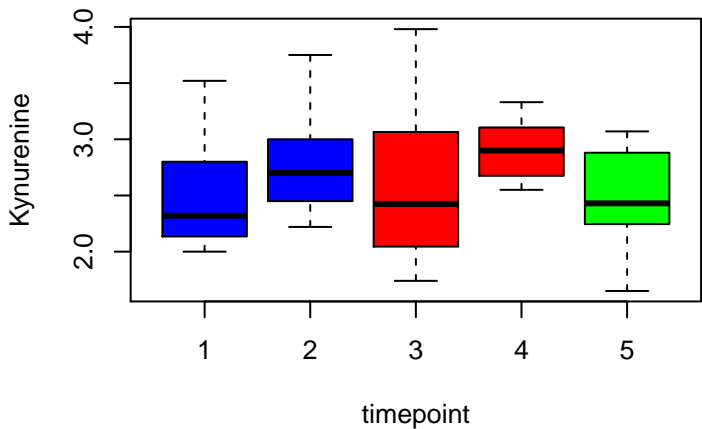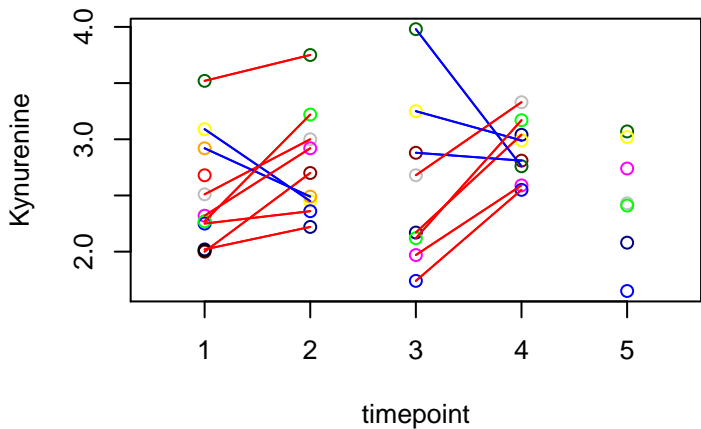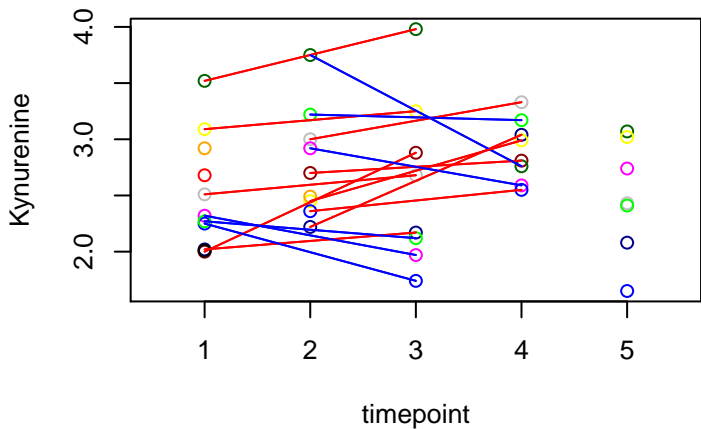

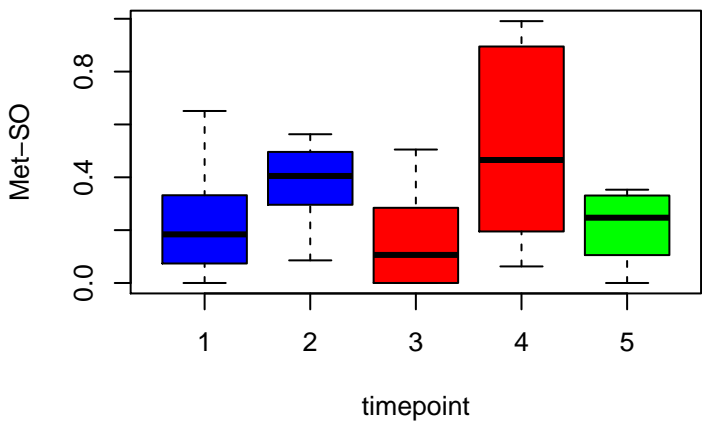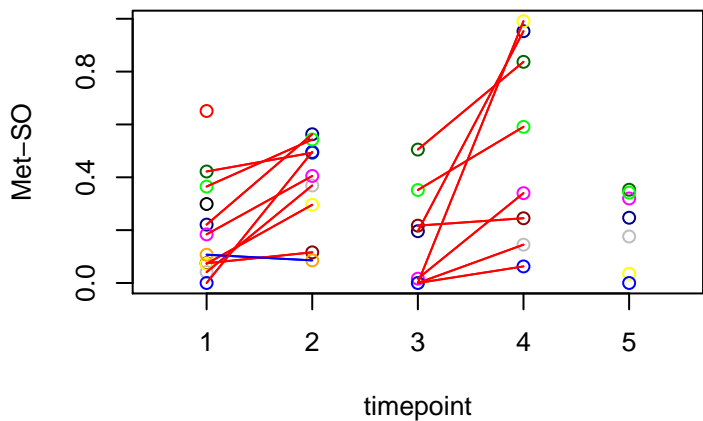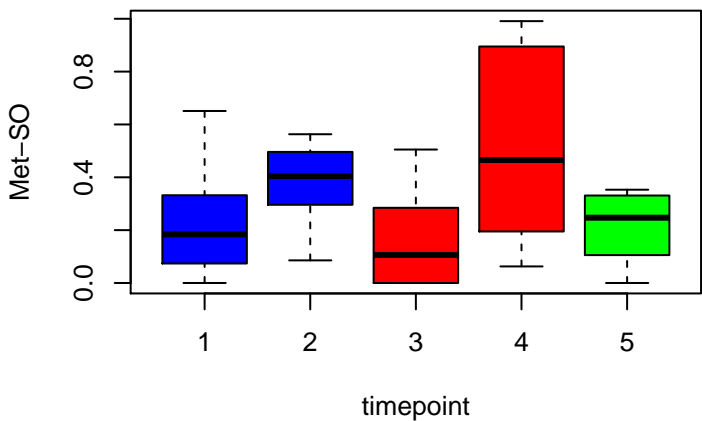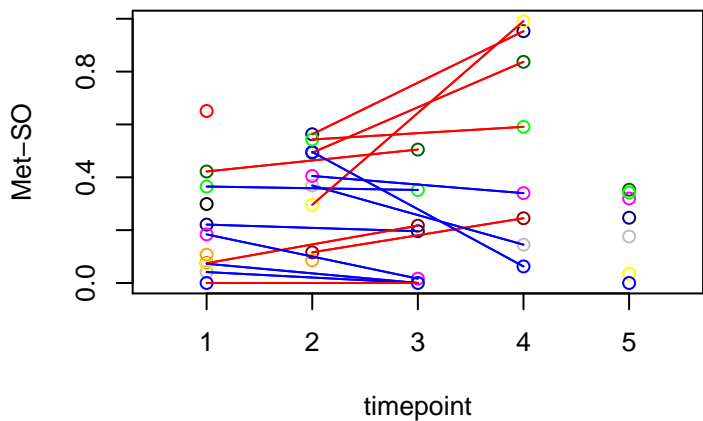

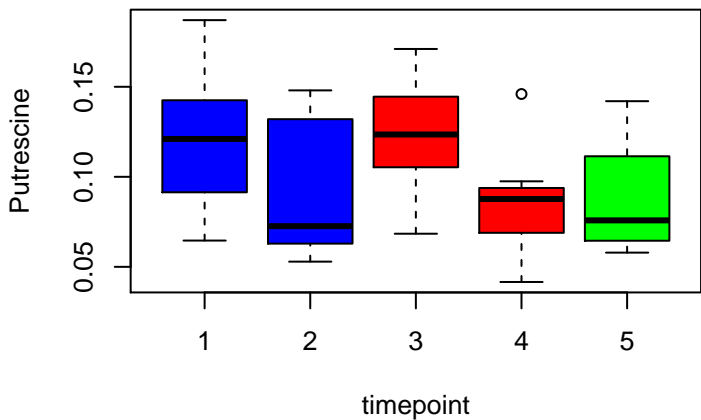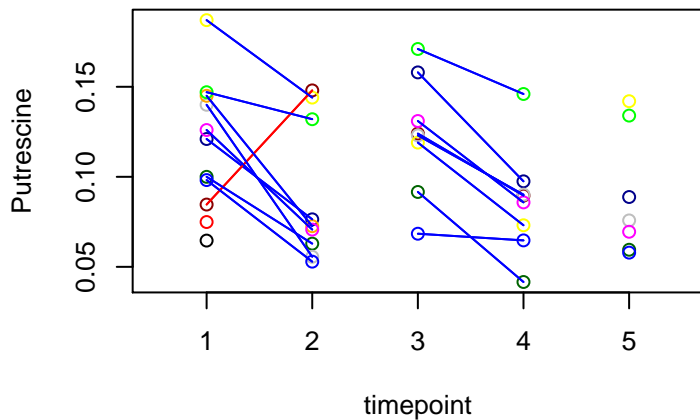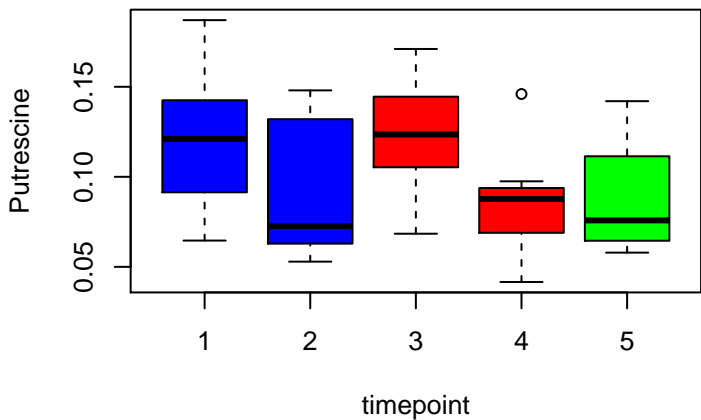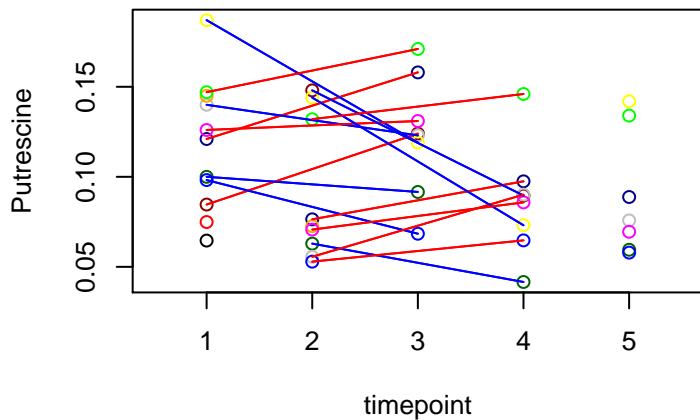

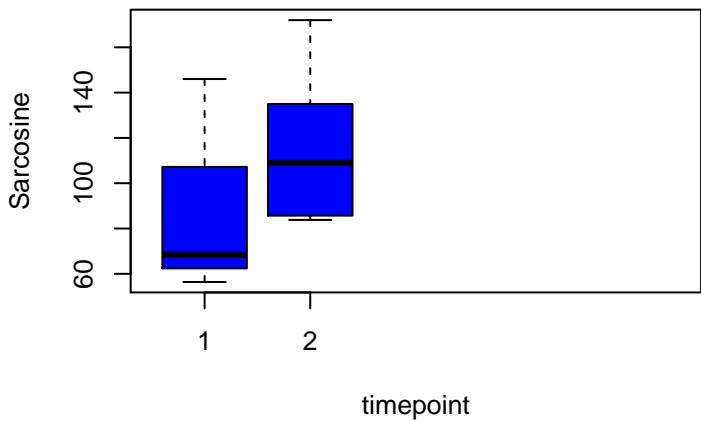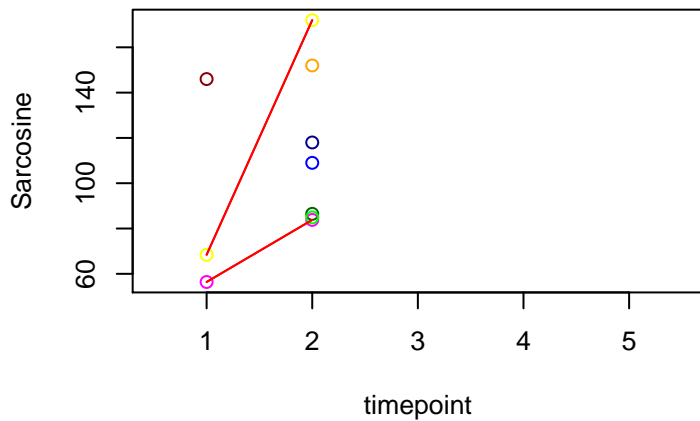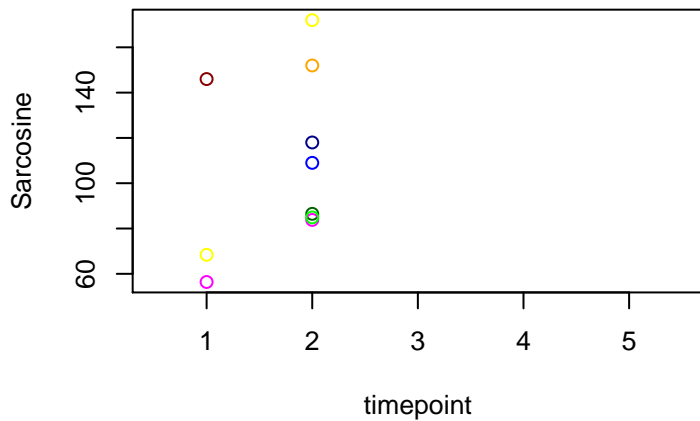

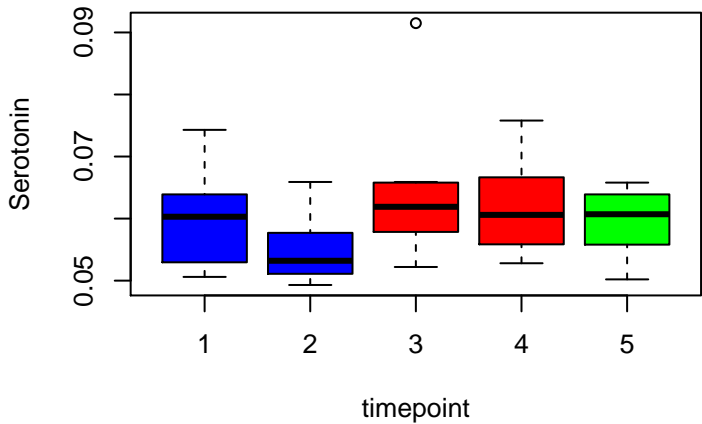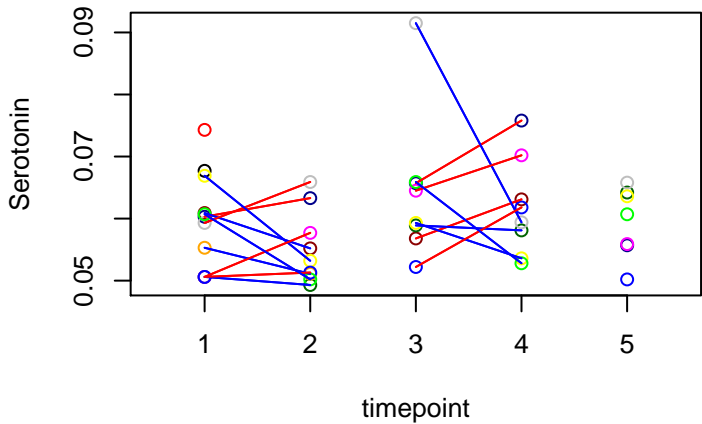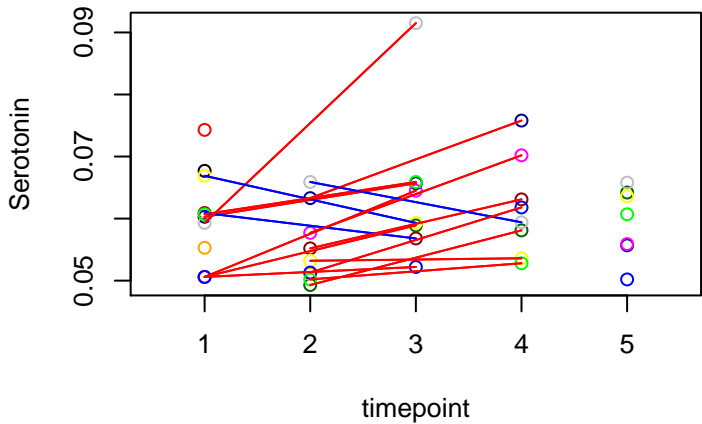



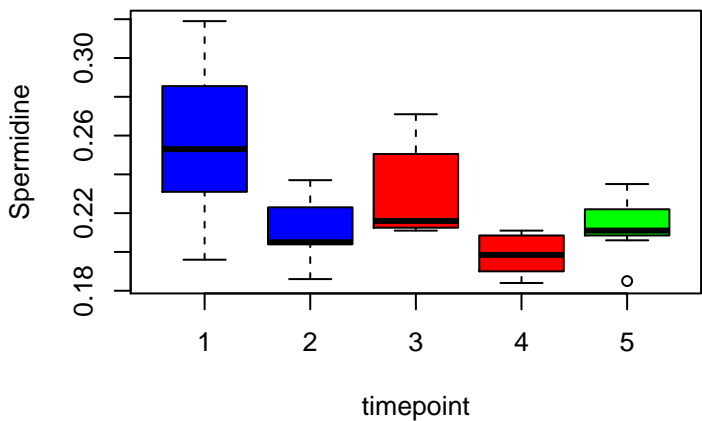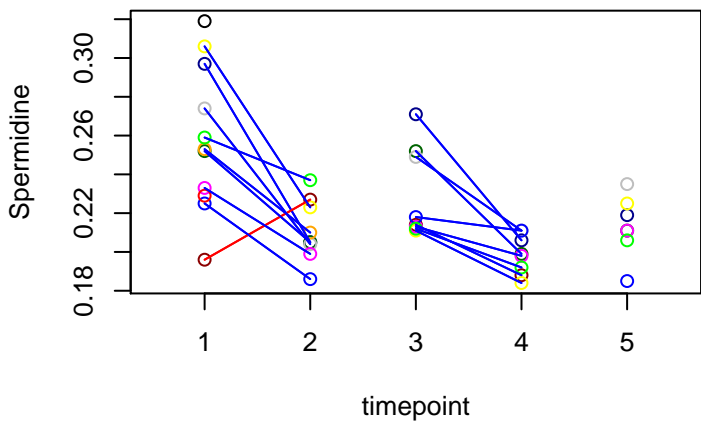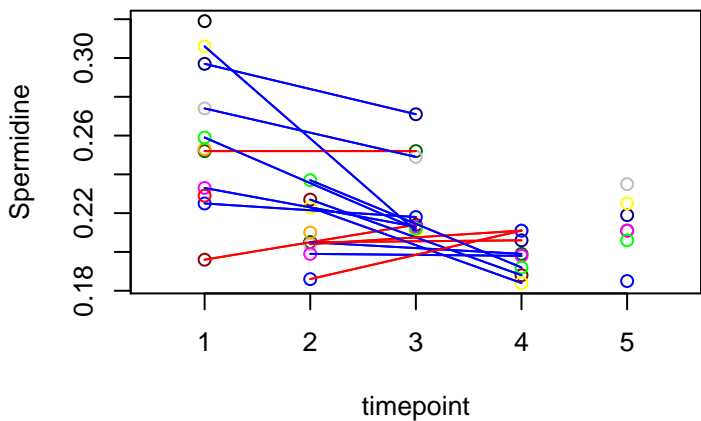

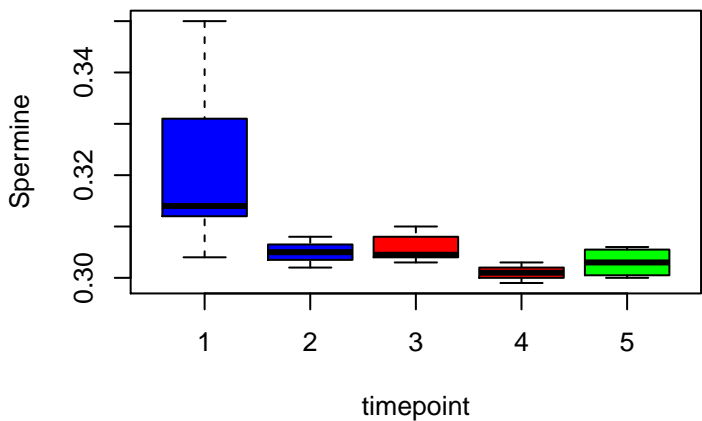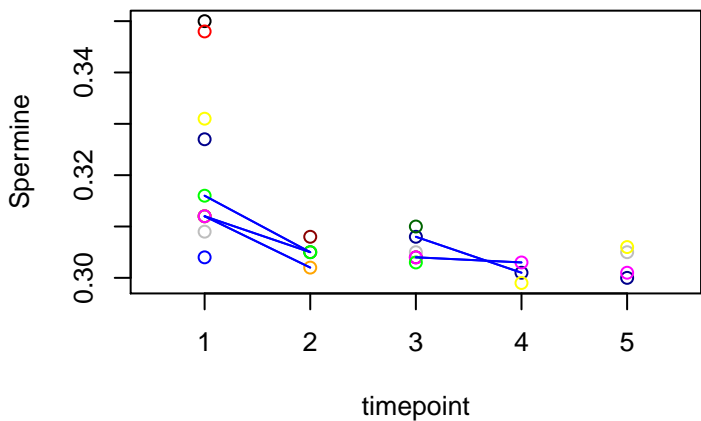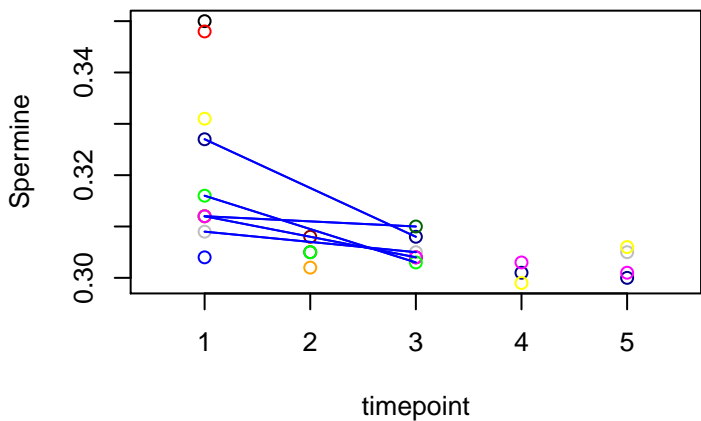

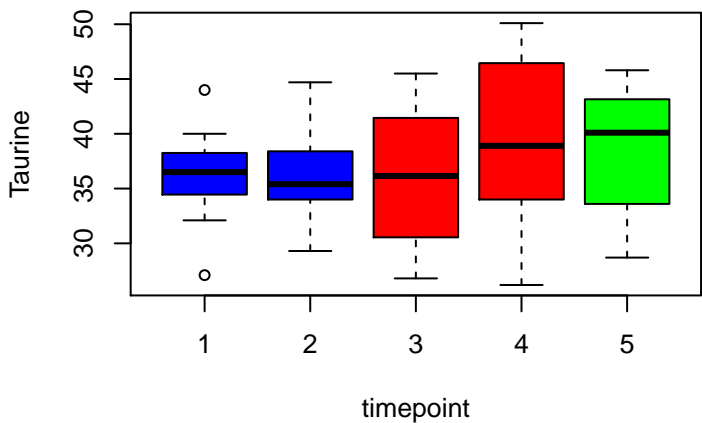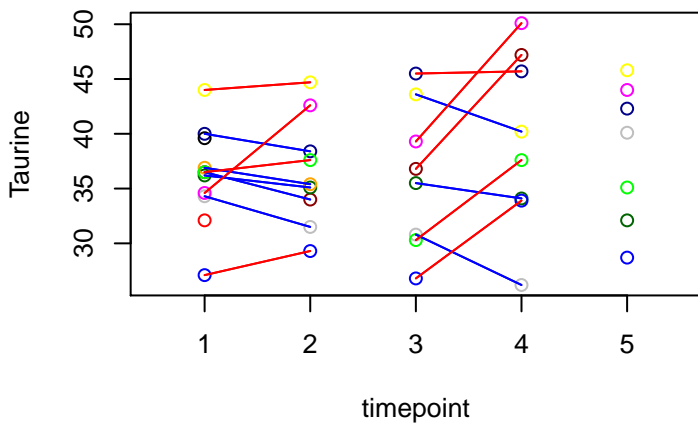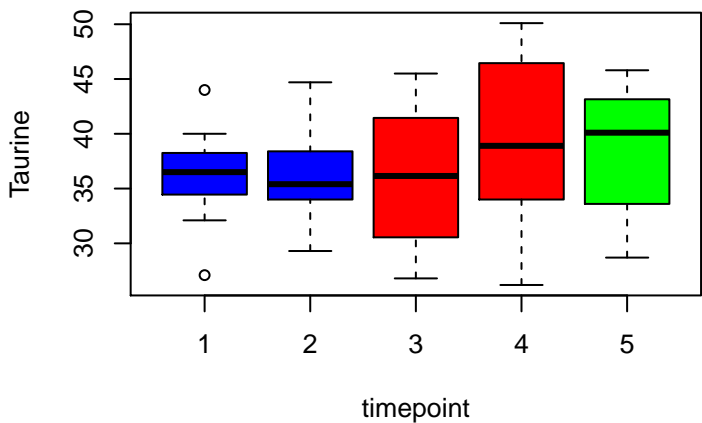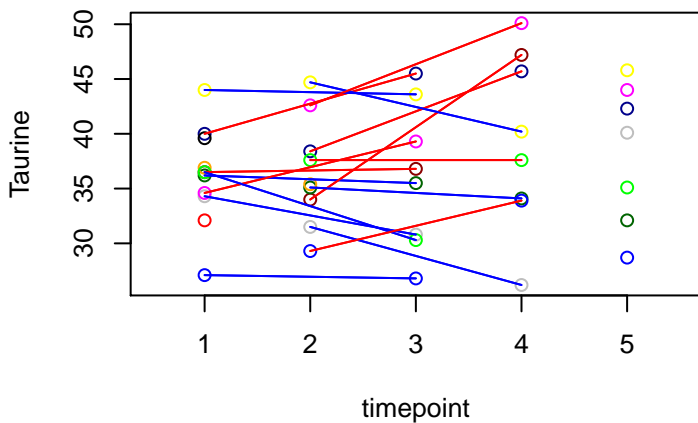

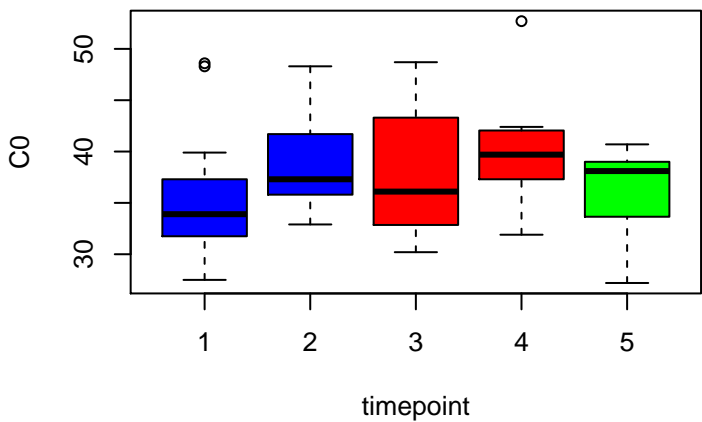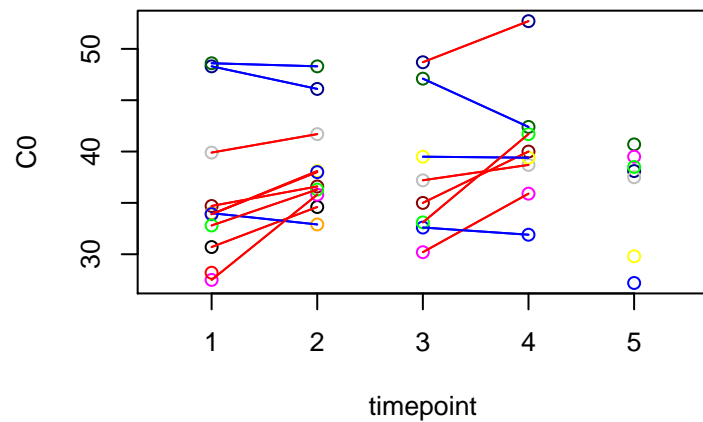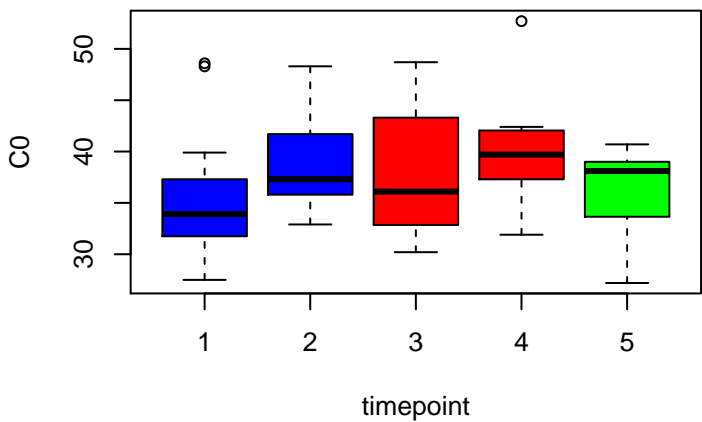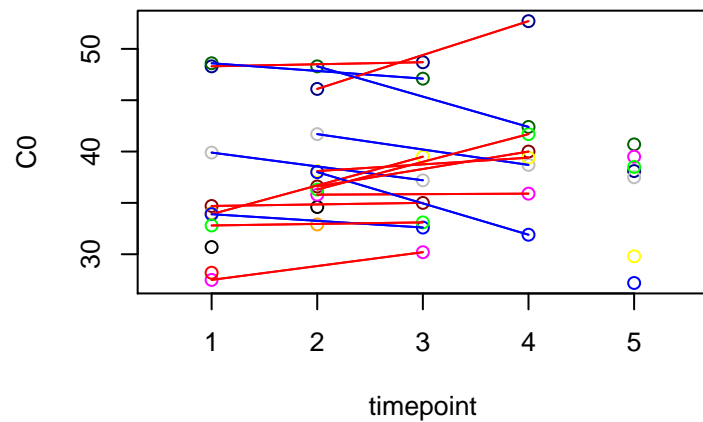

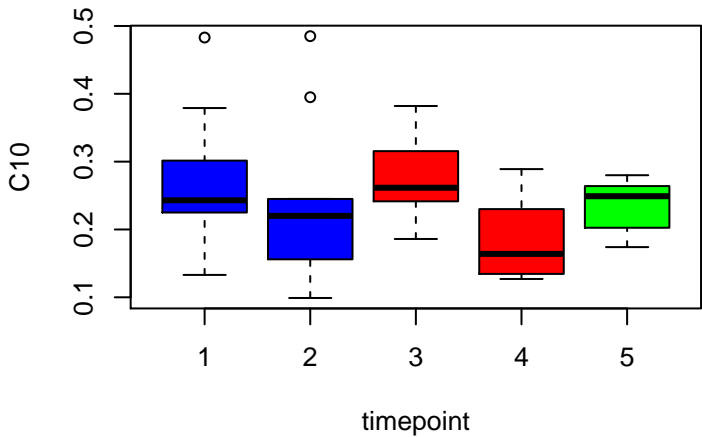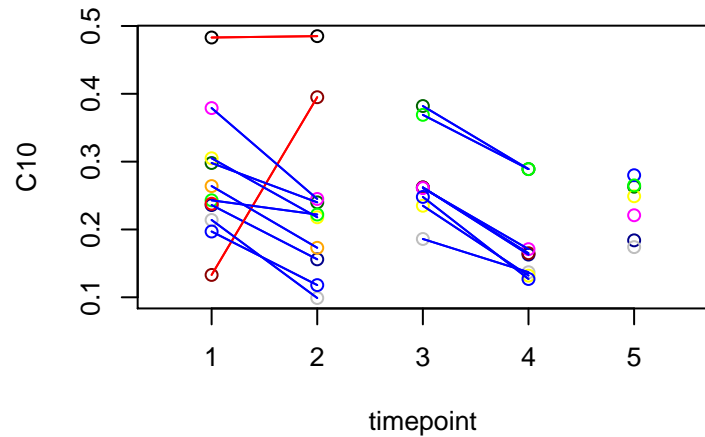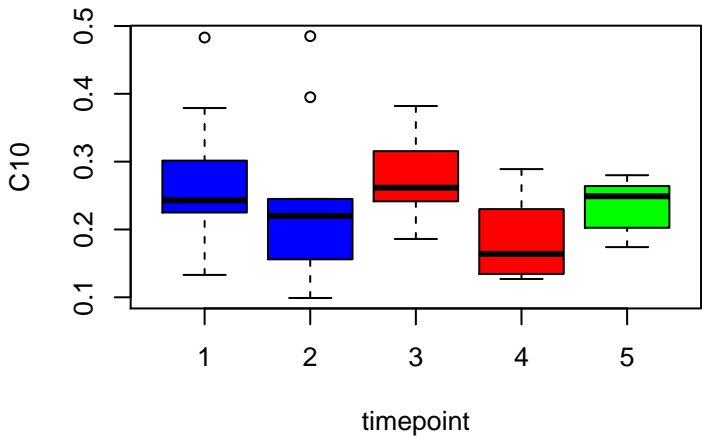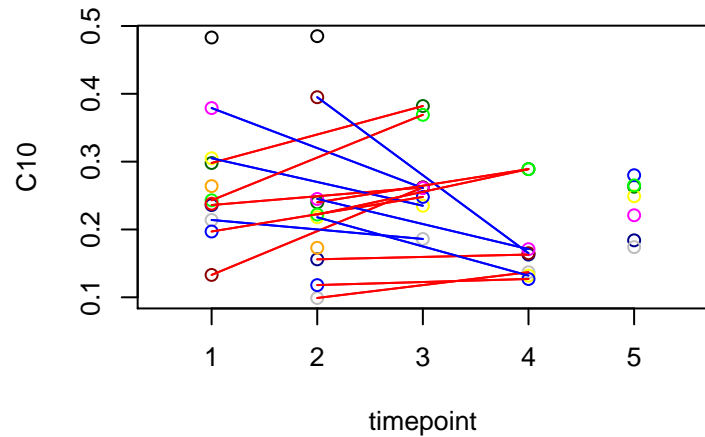

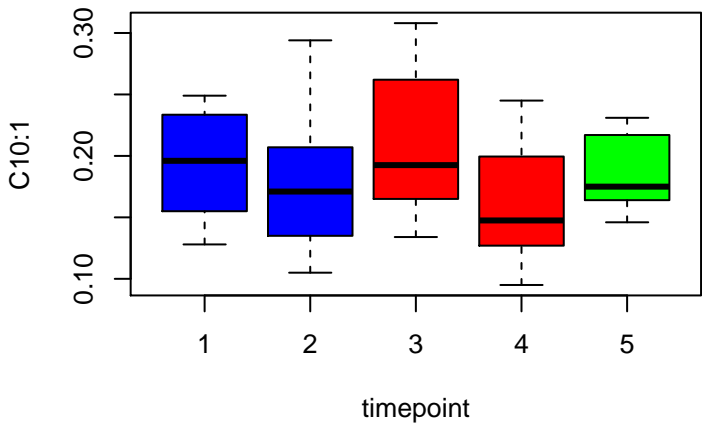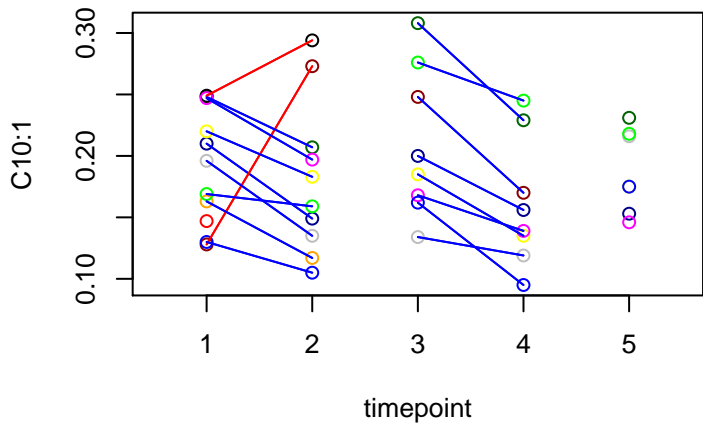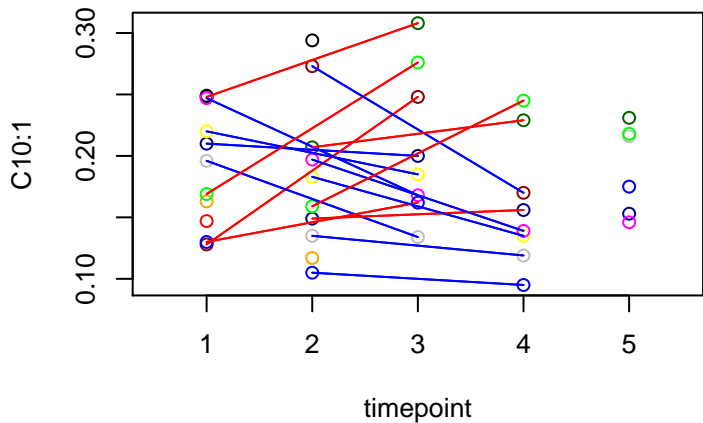

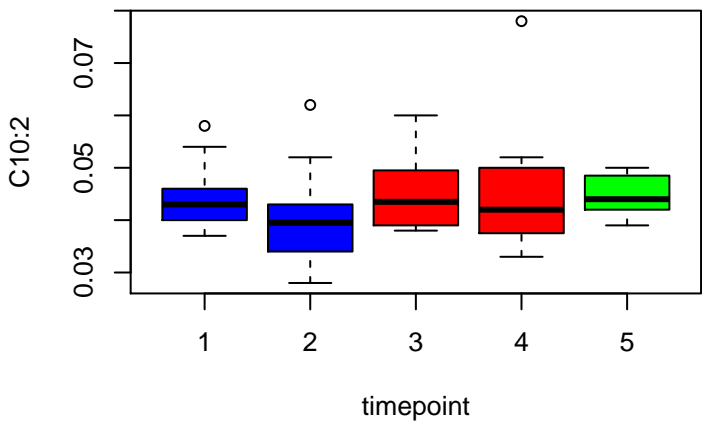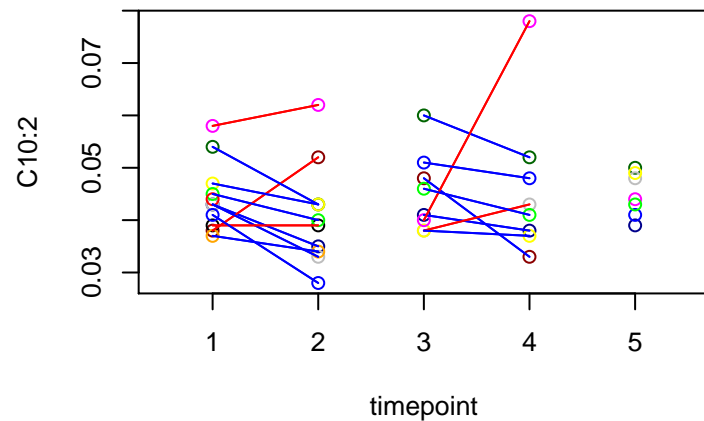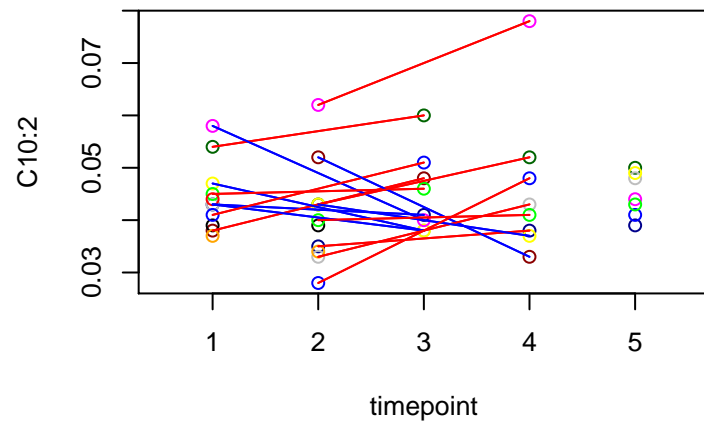

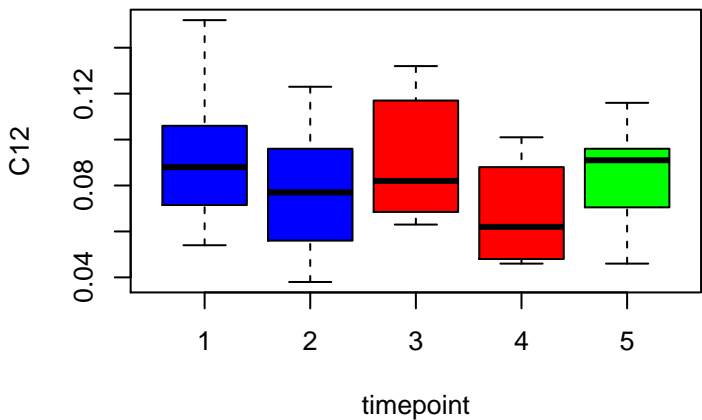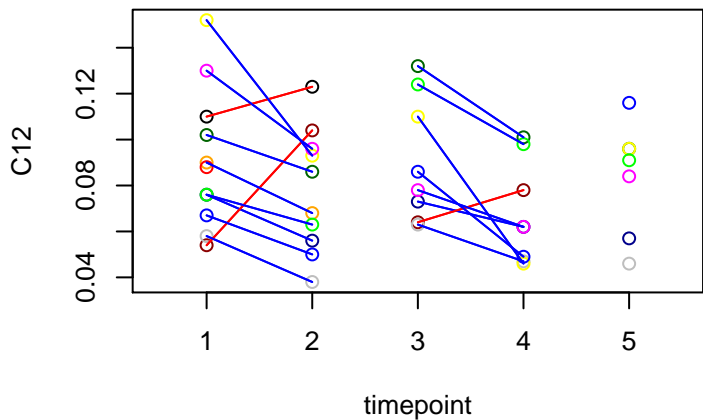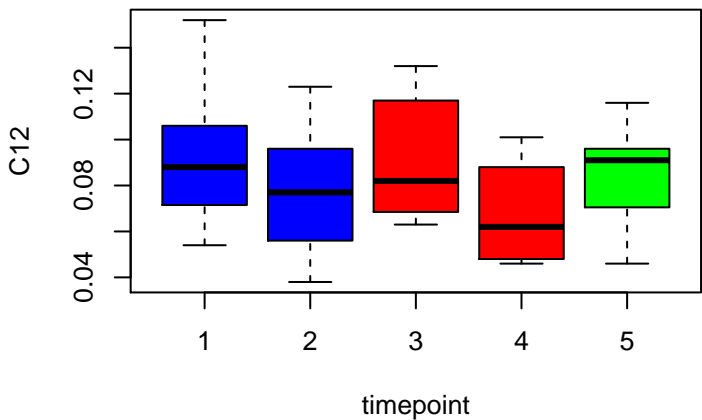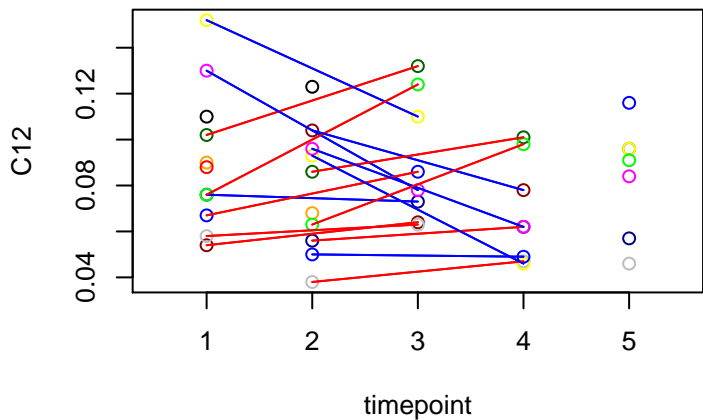



C12-DC

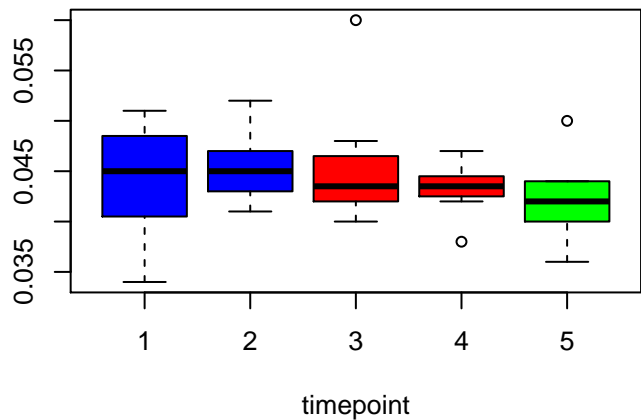

C12-DC

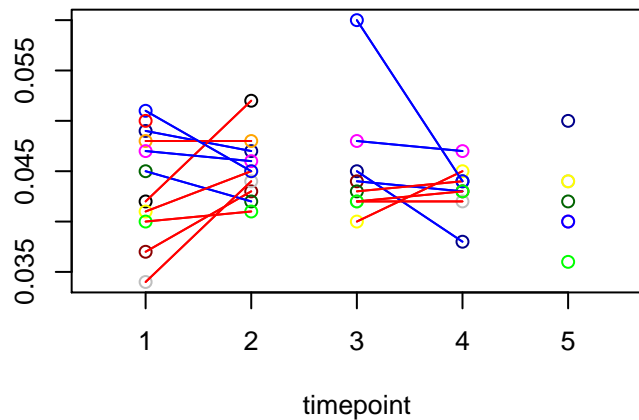

C12-DC

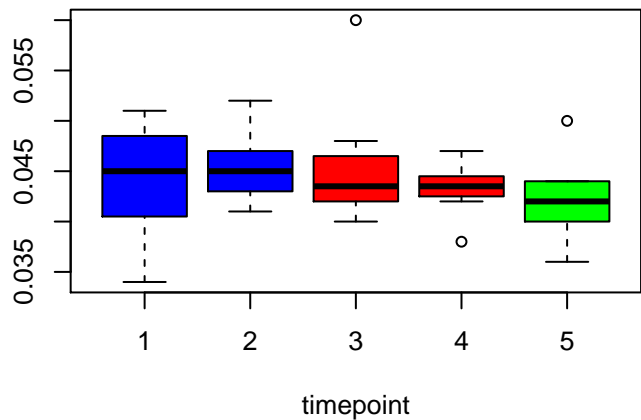

C12-DC

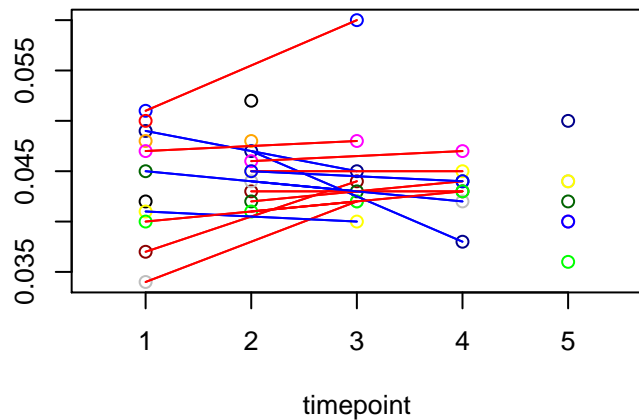

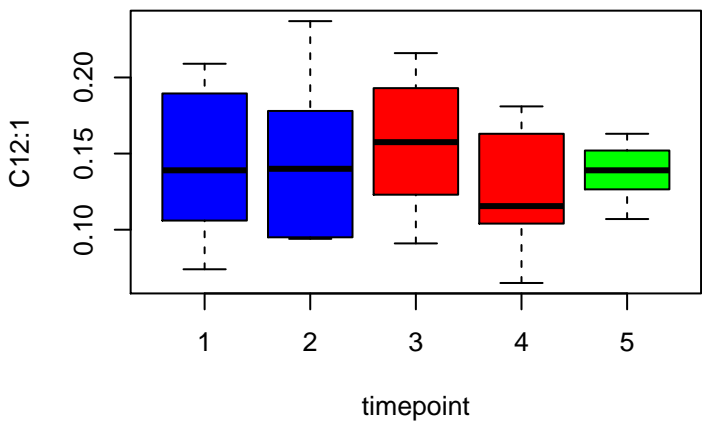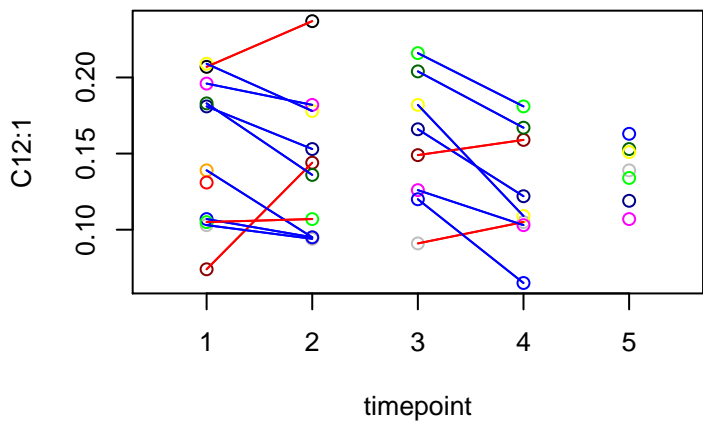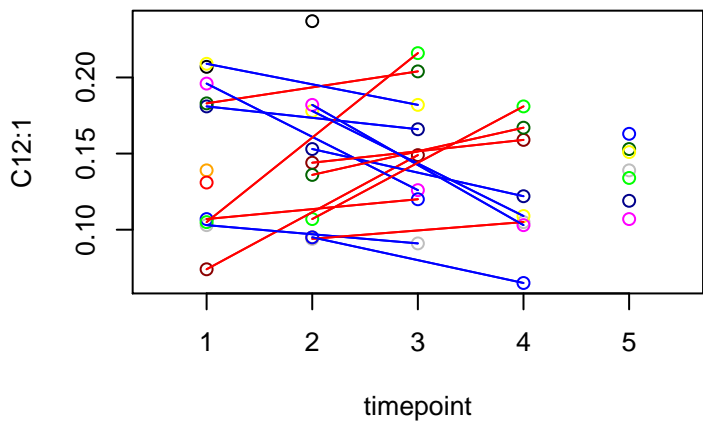

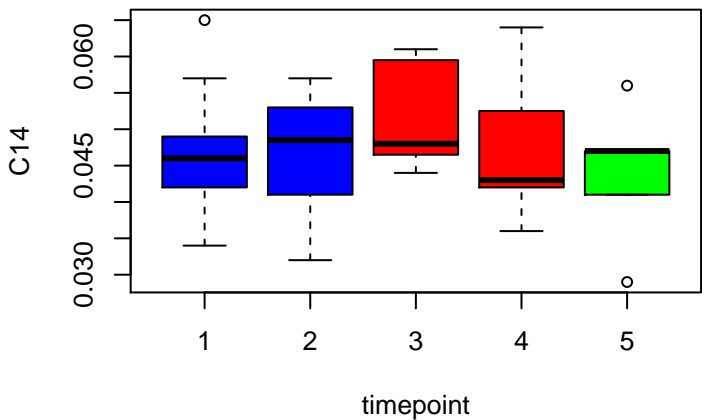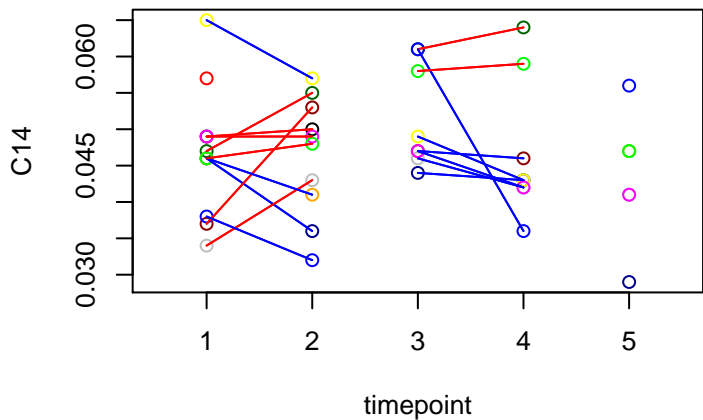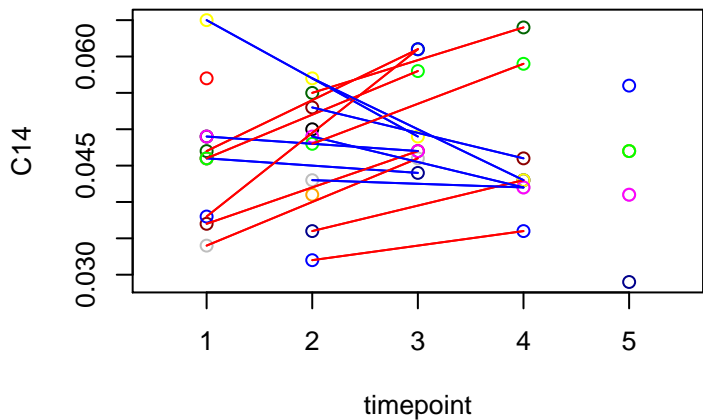

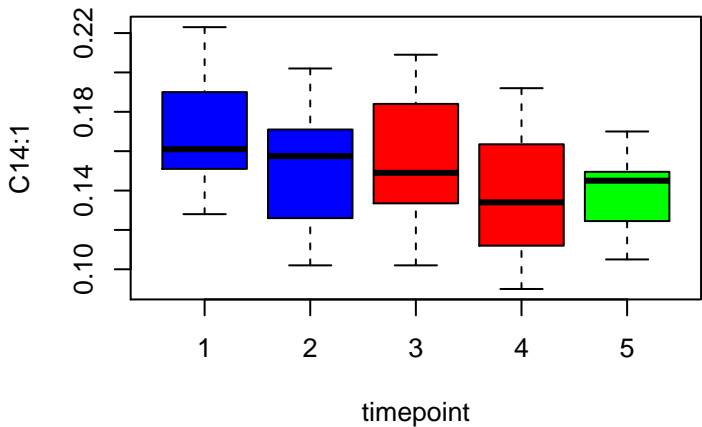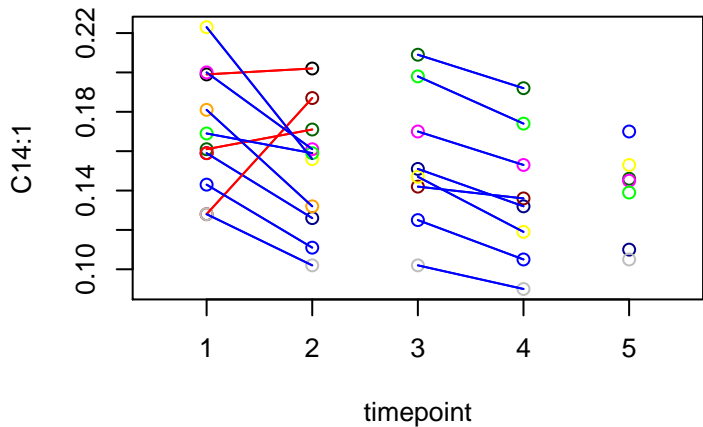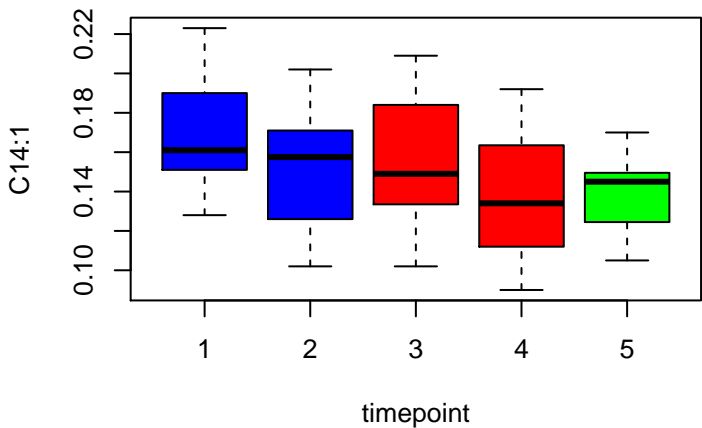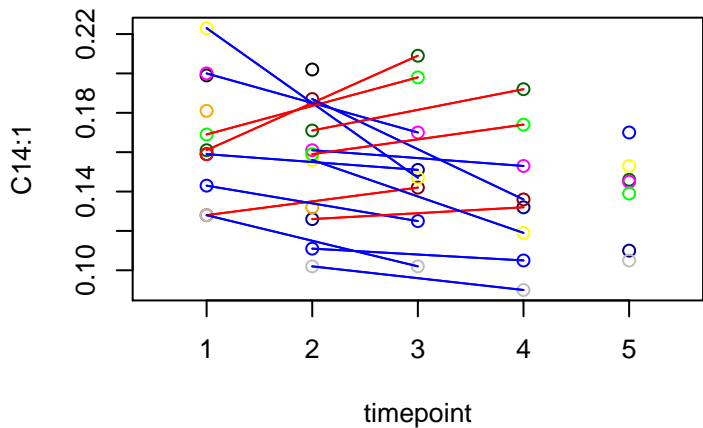

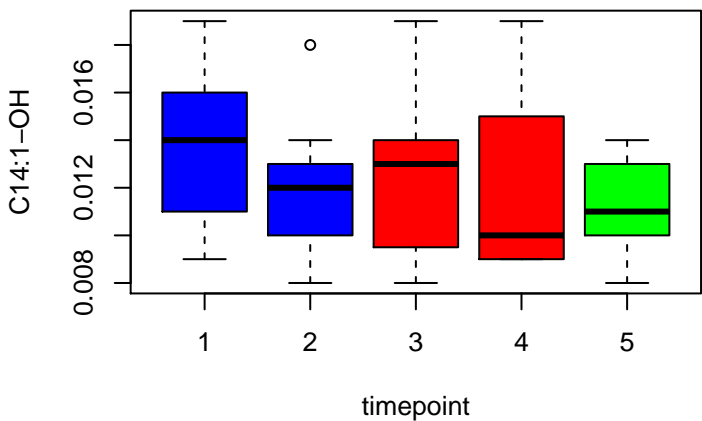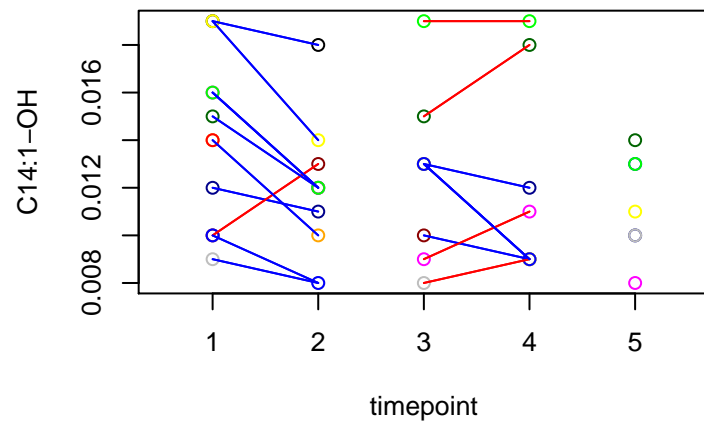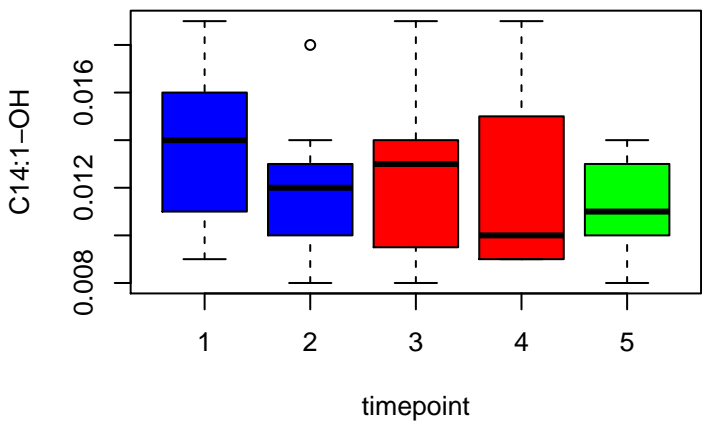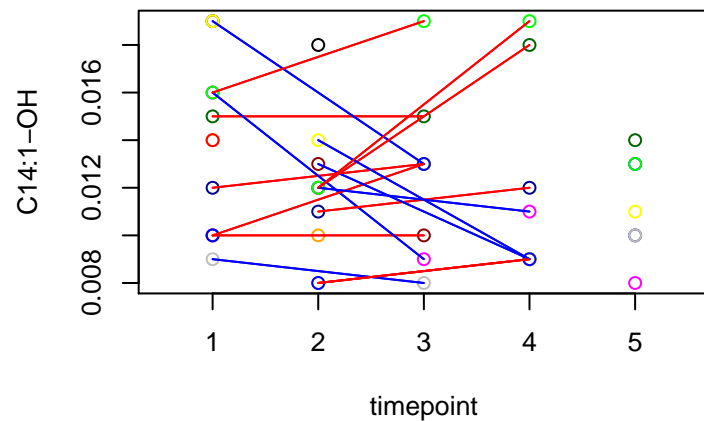

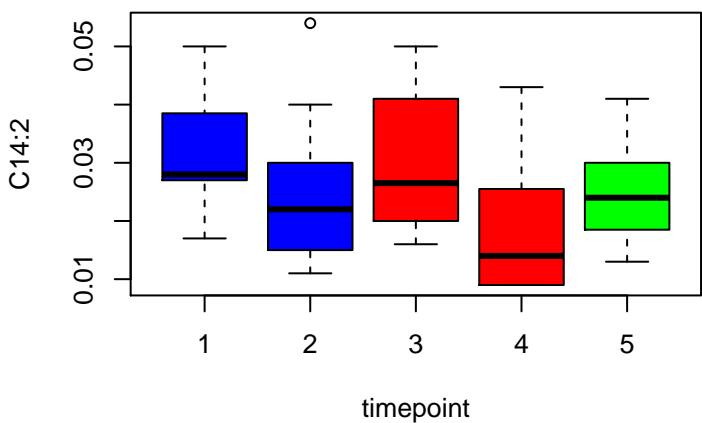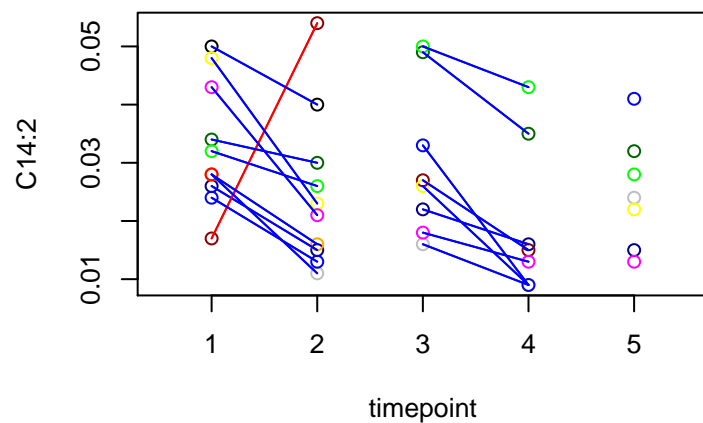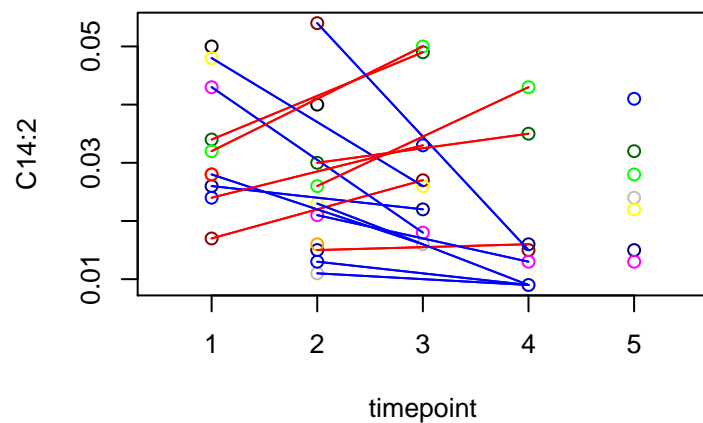

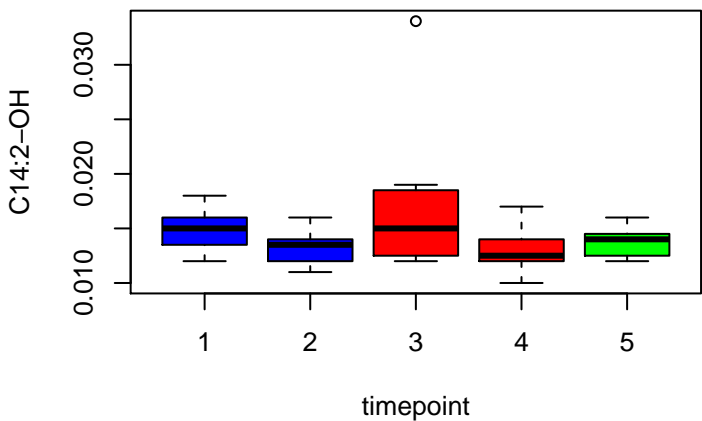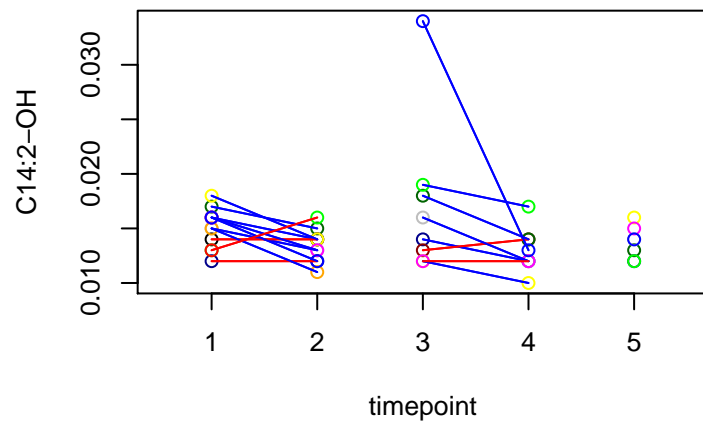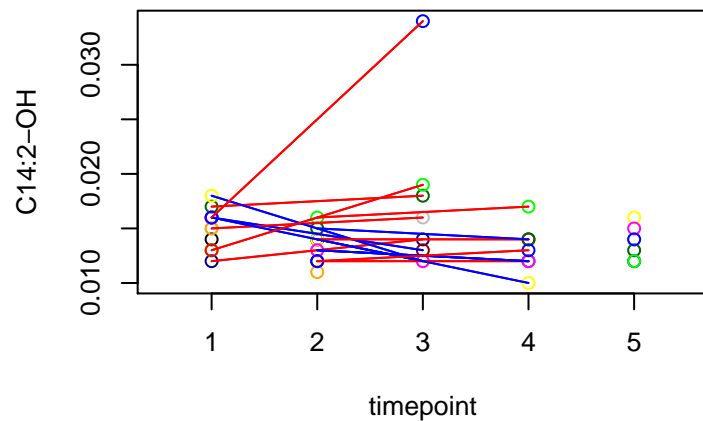

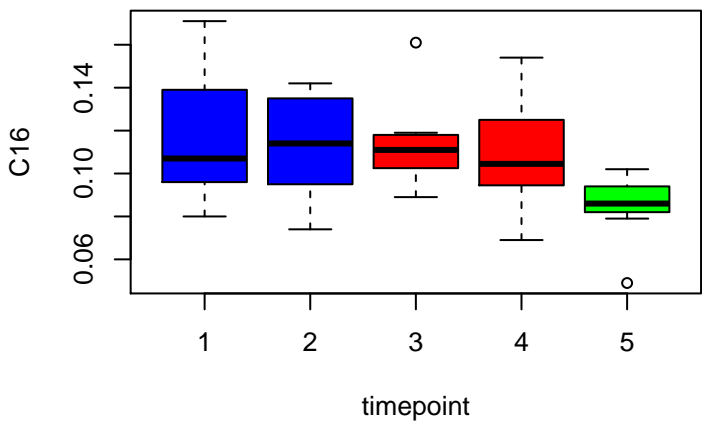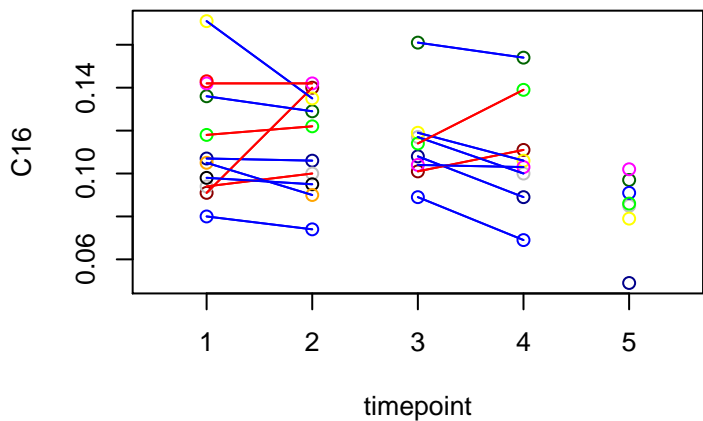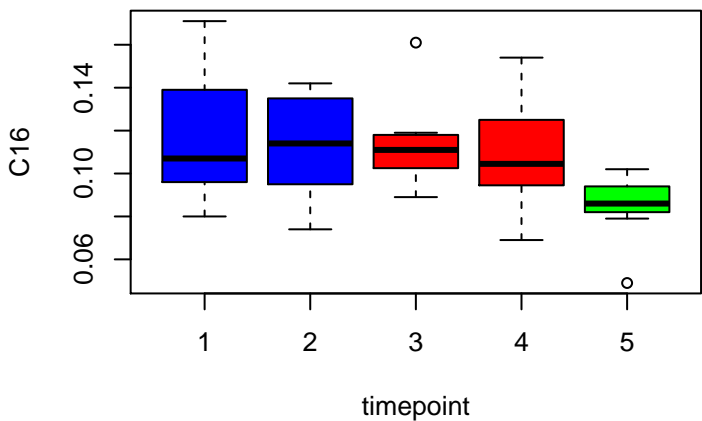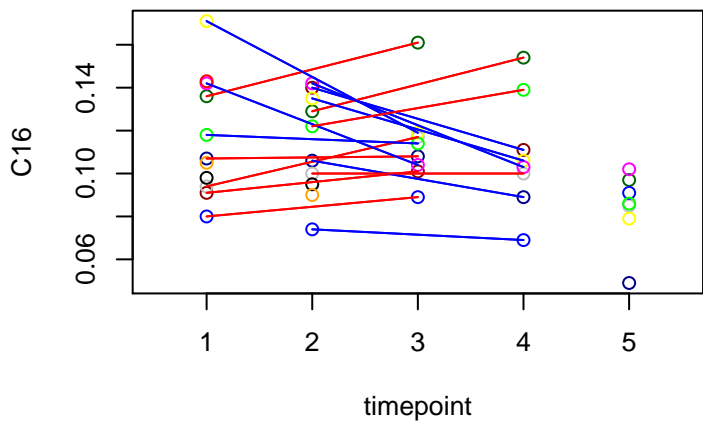



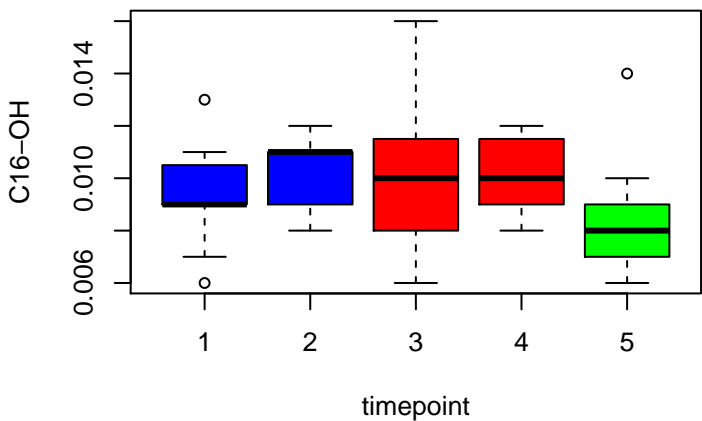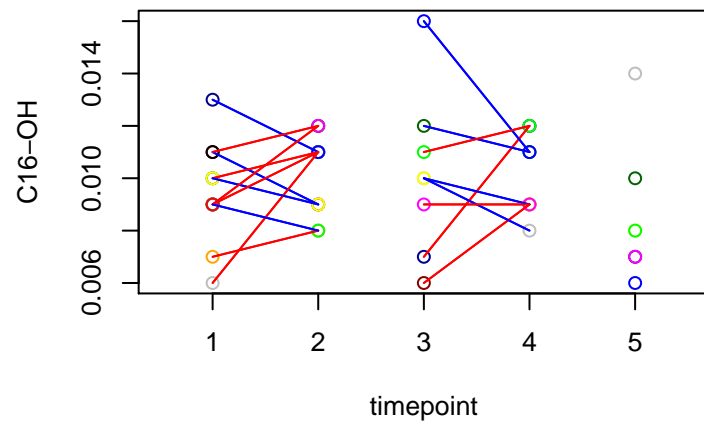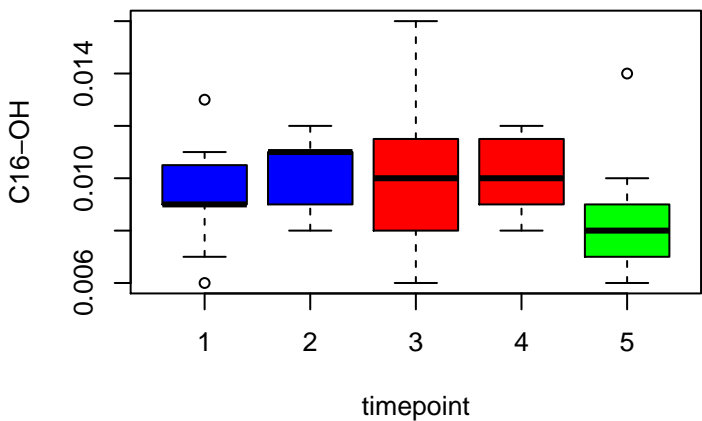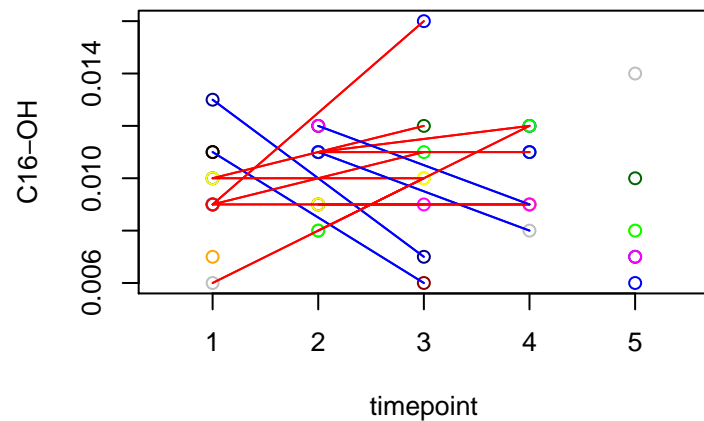

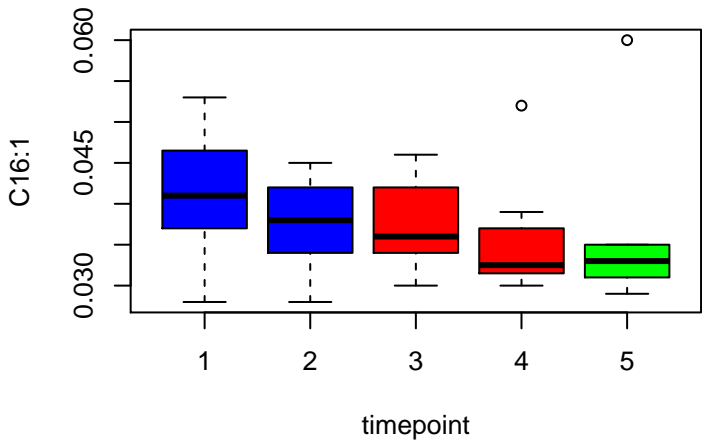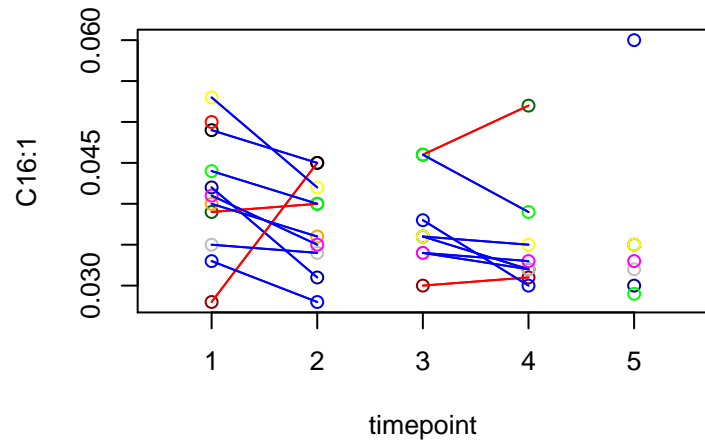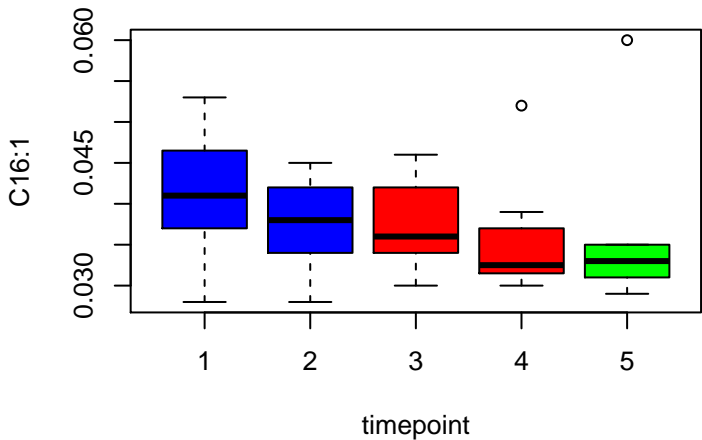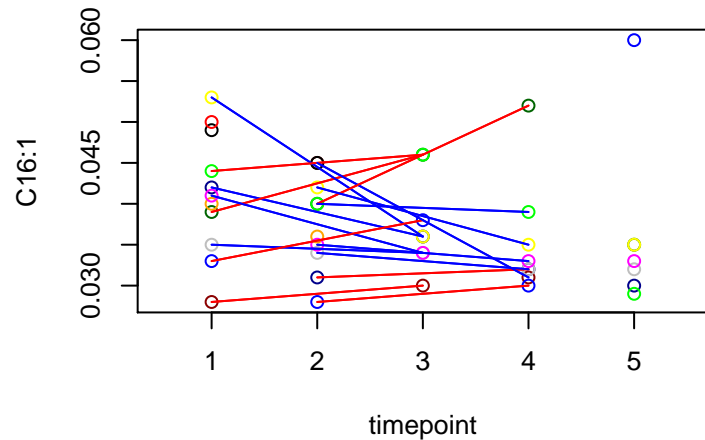

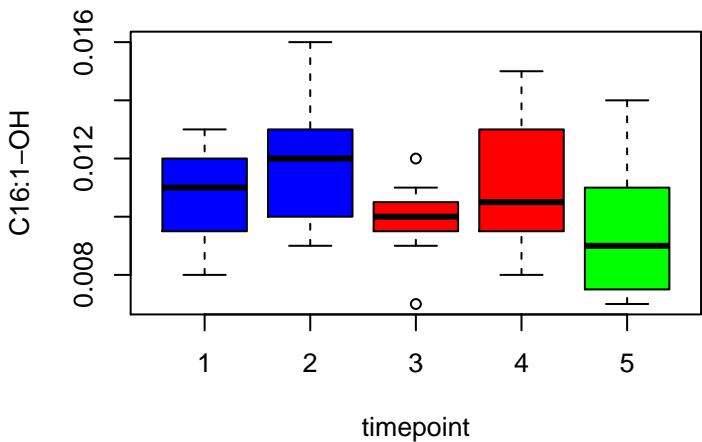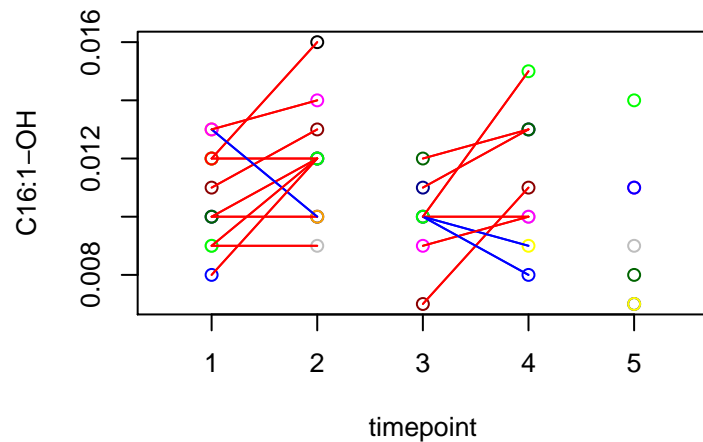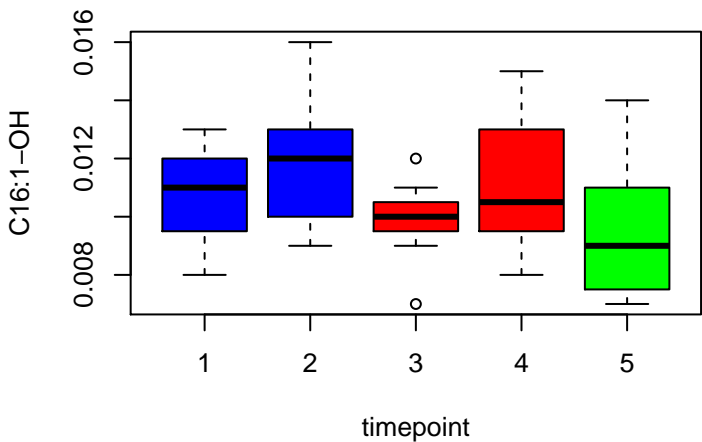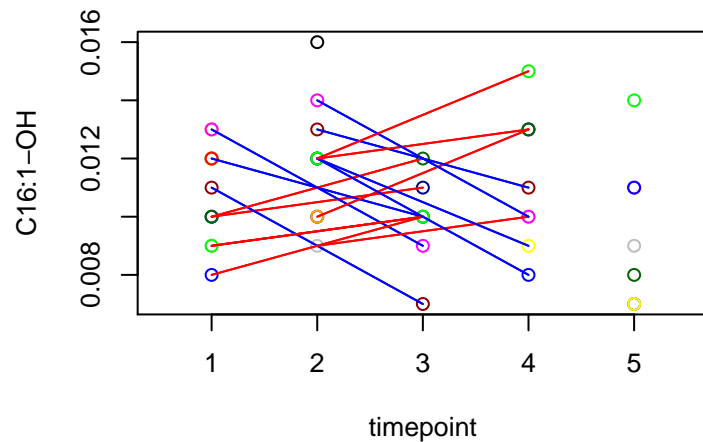

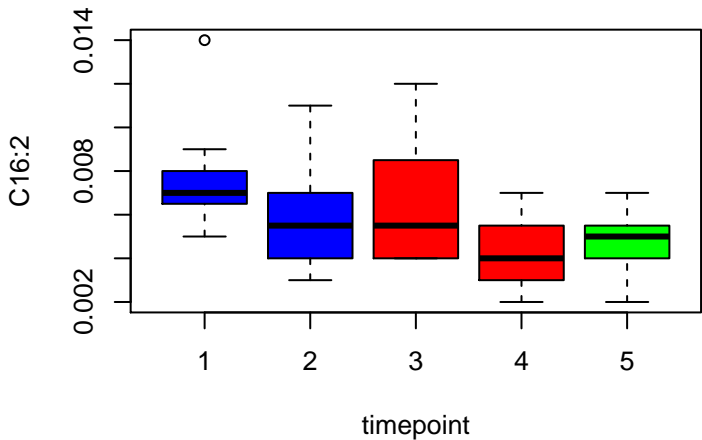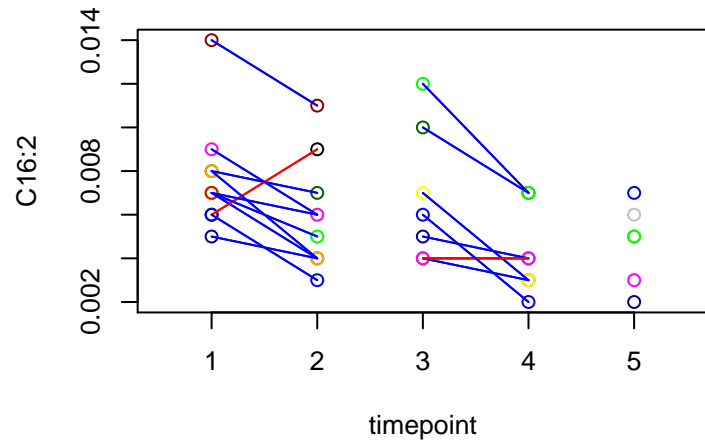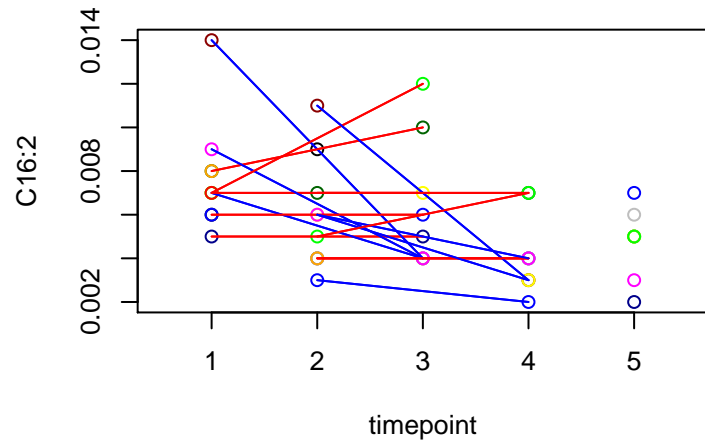

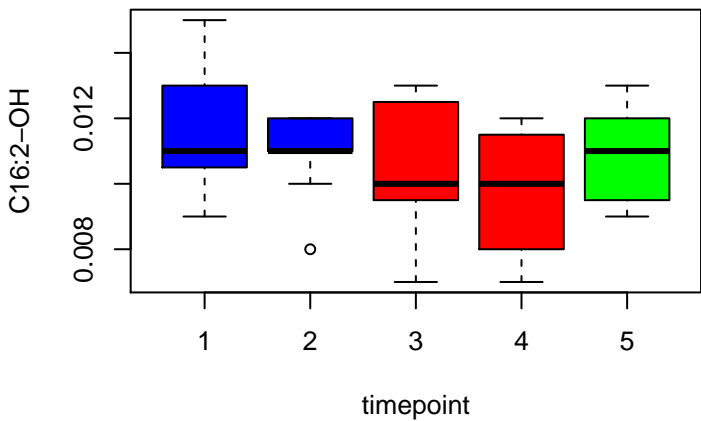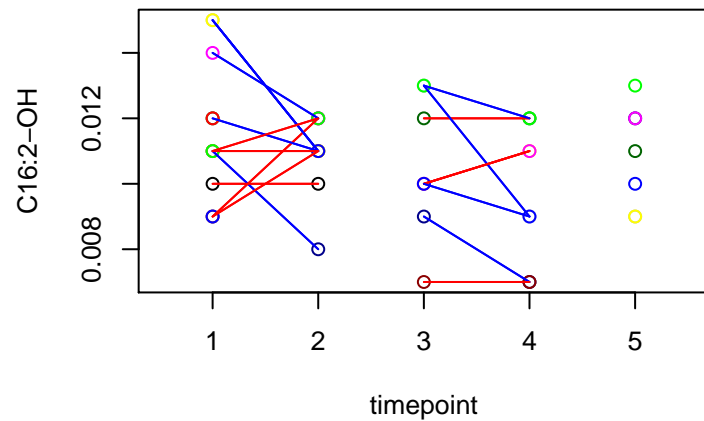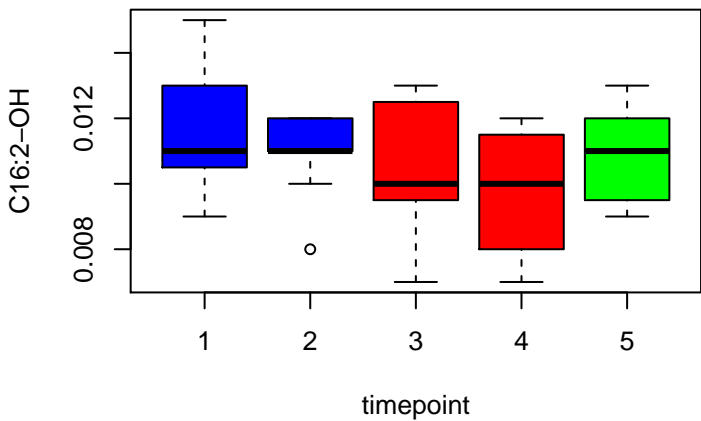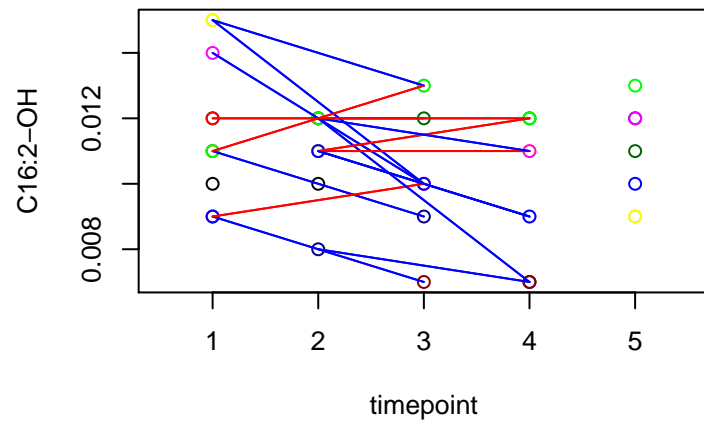

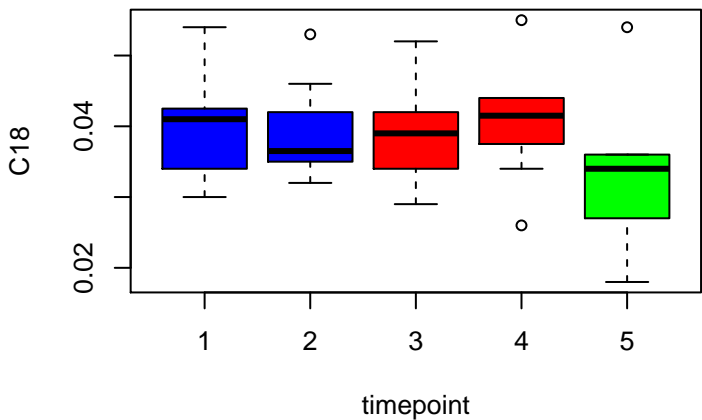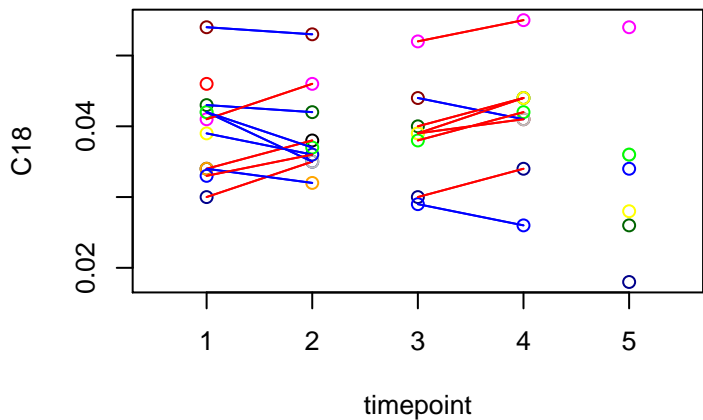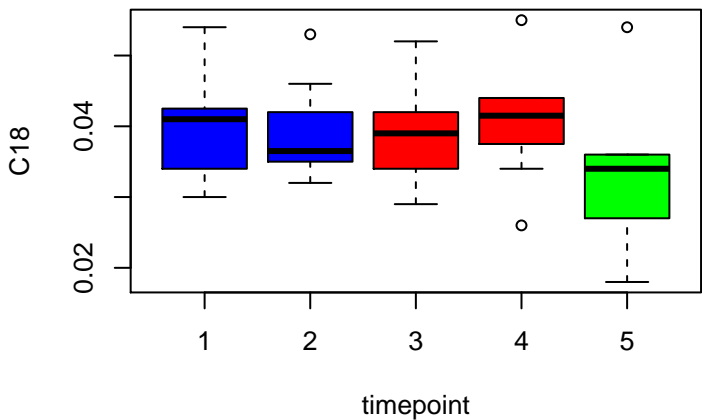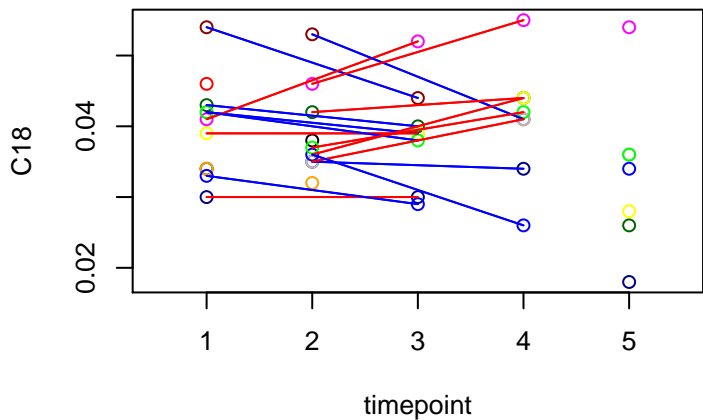

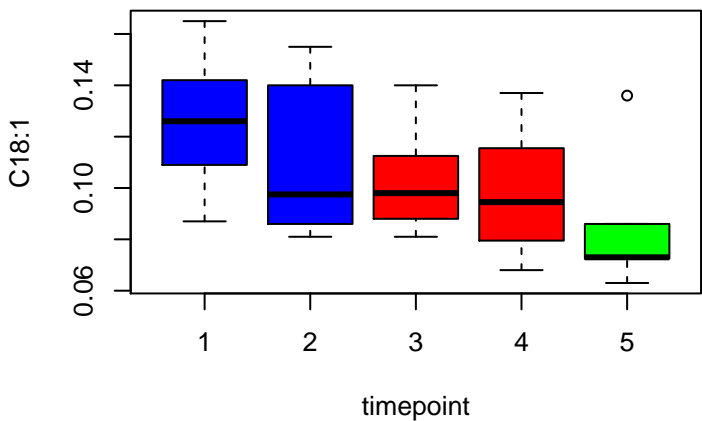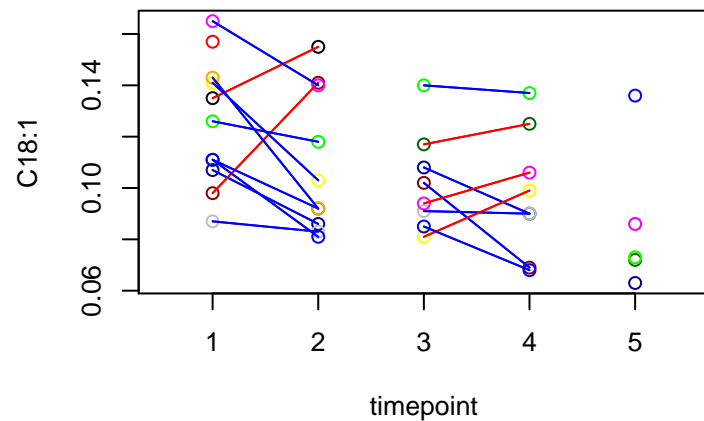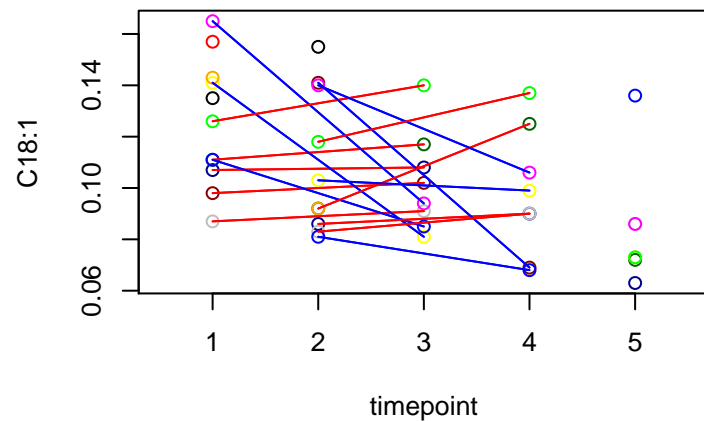

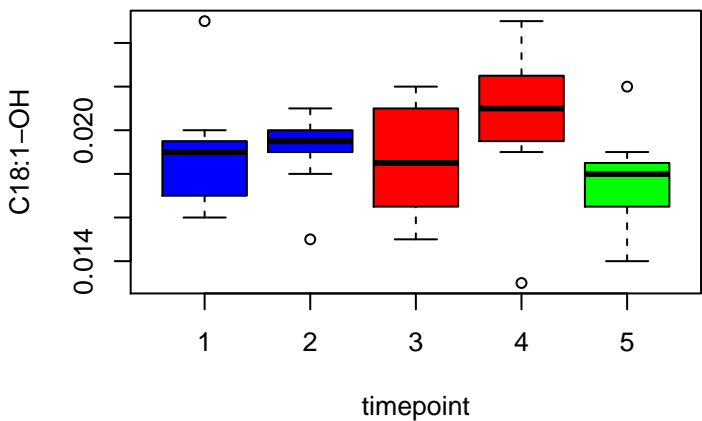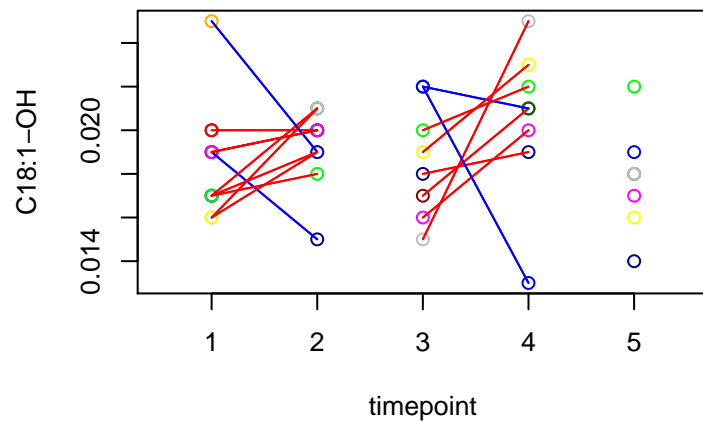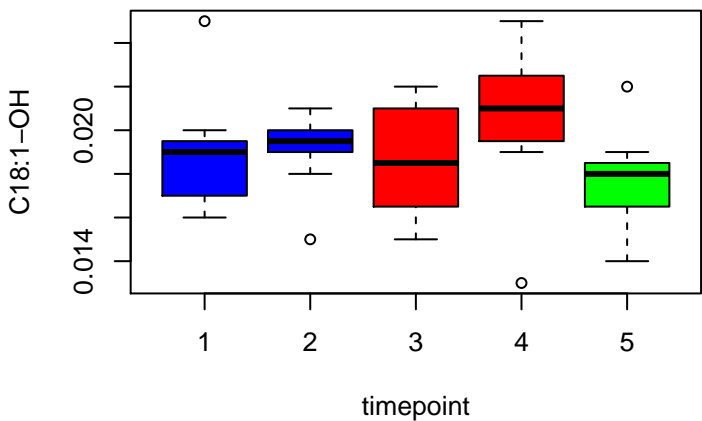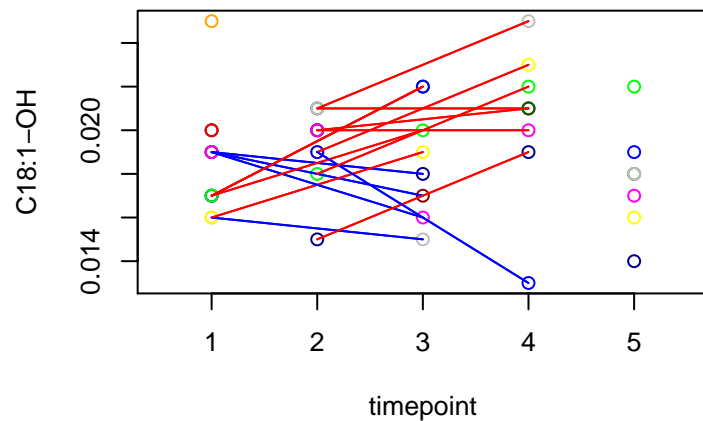



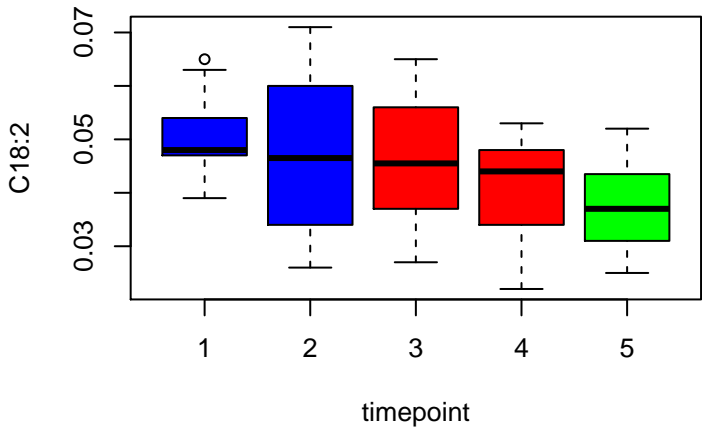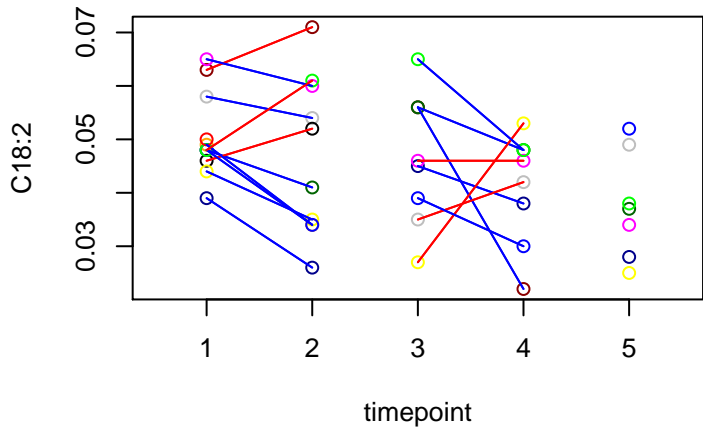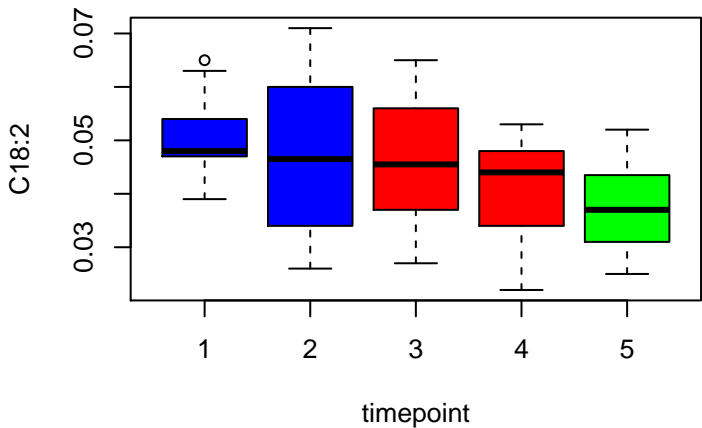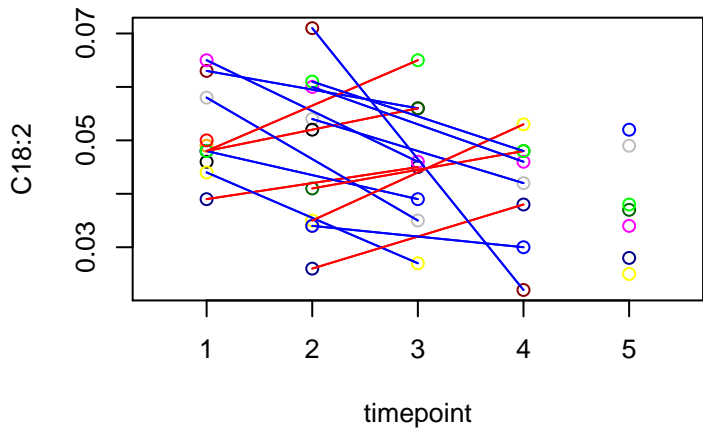

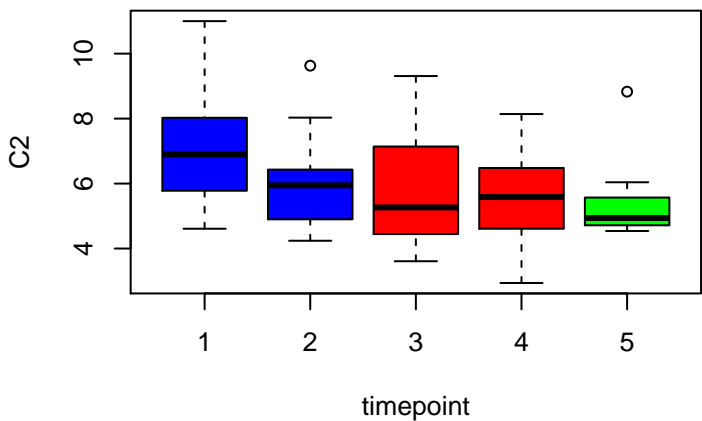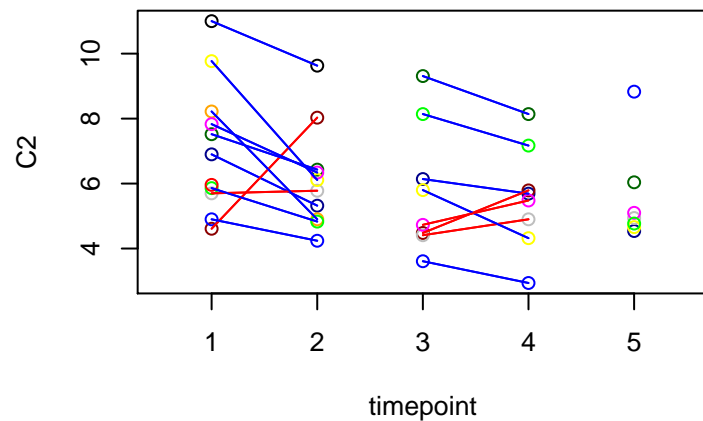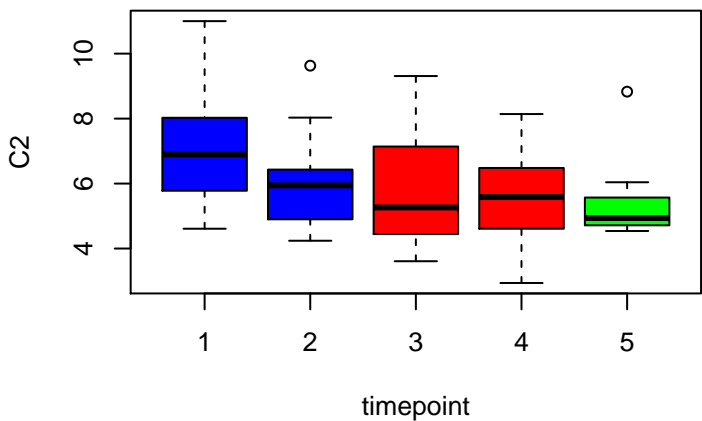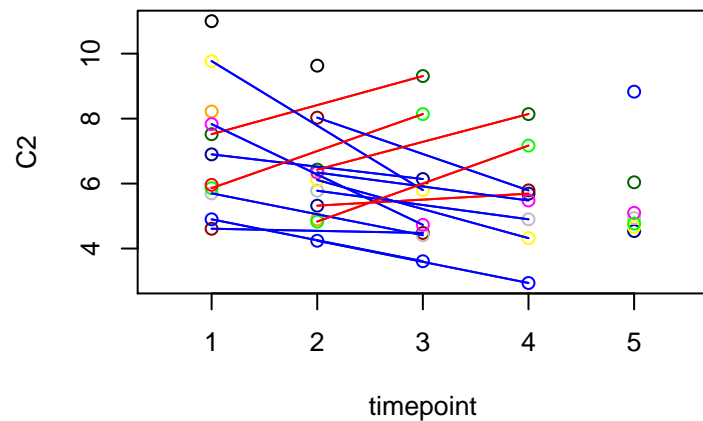

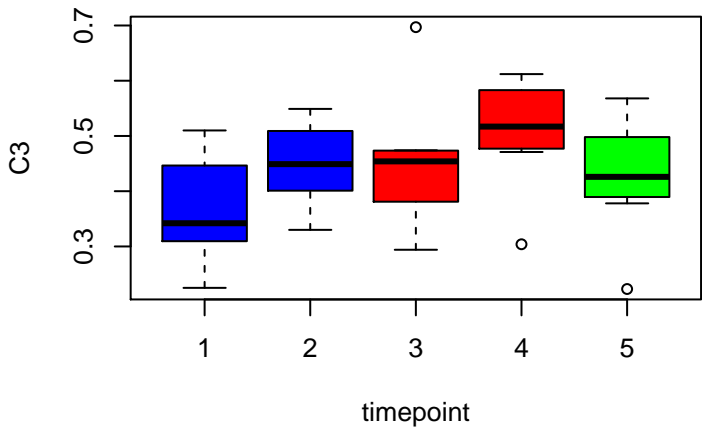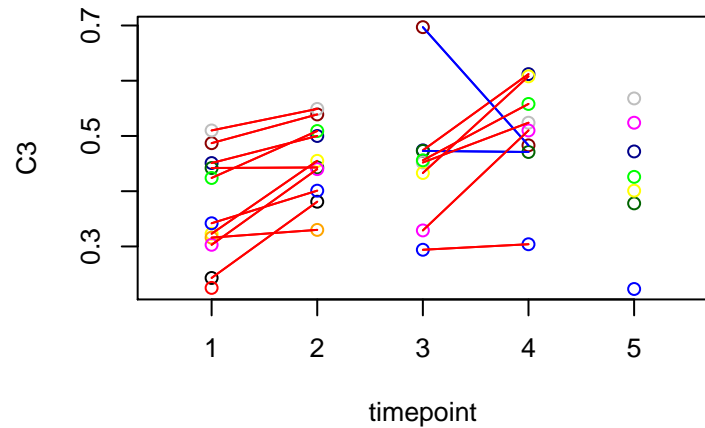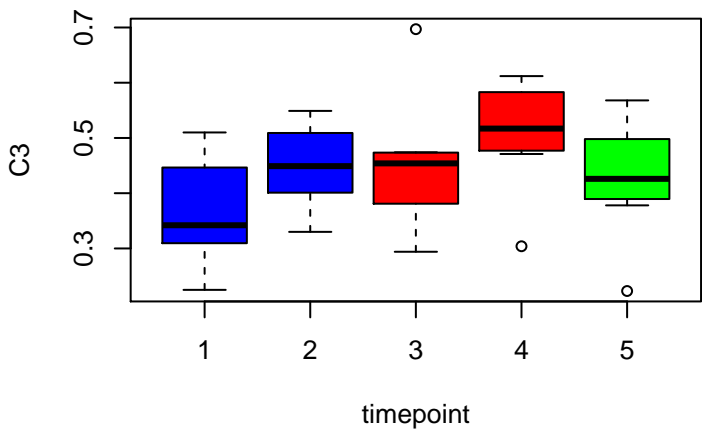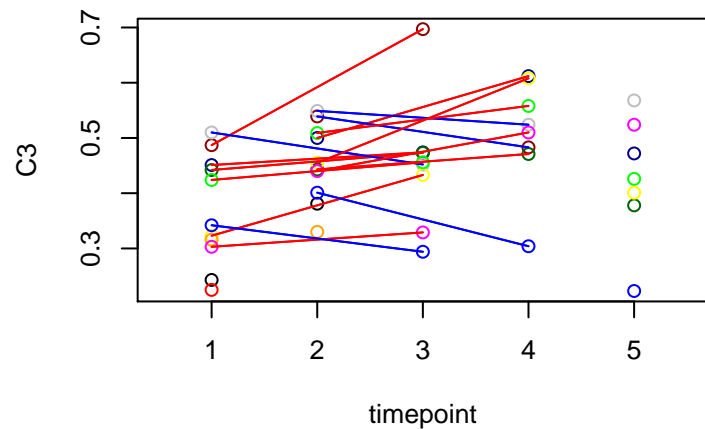

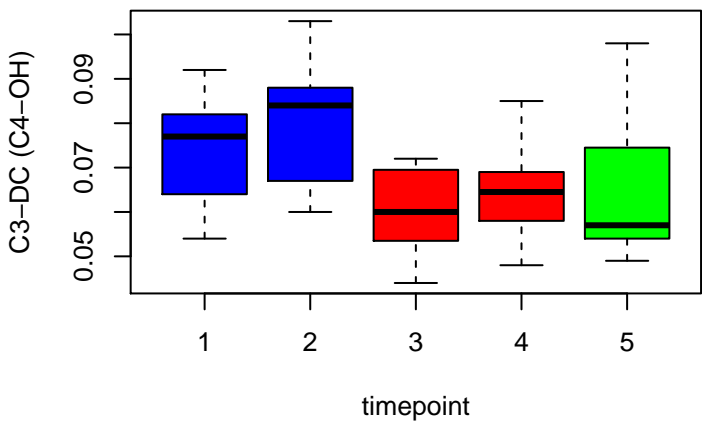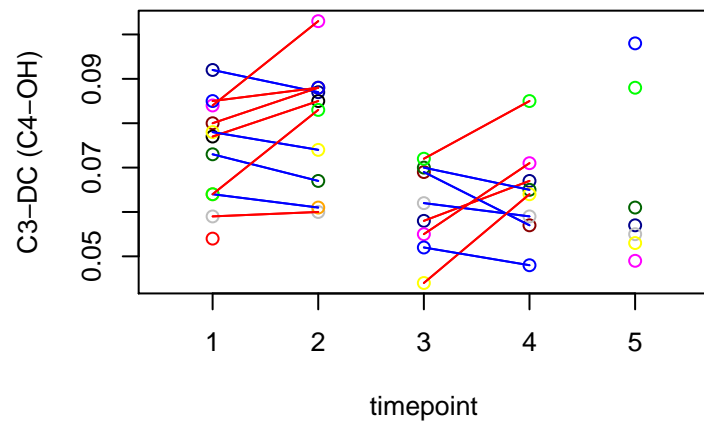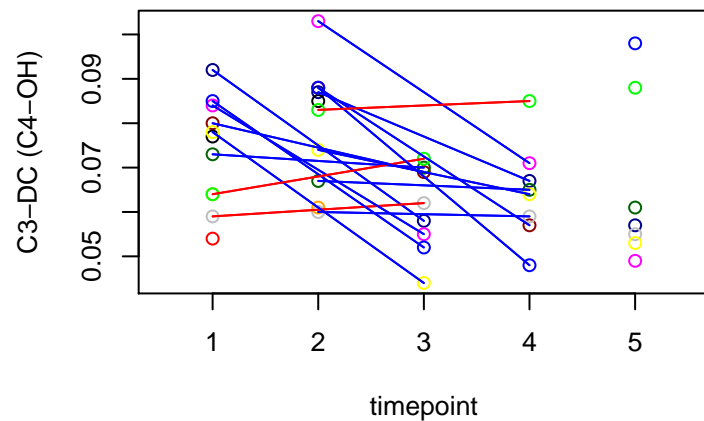

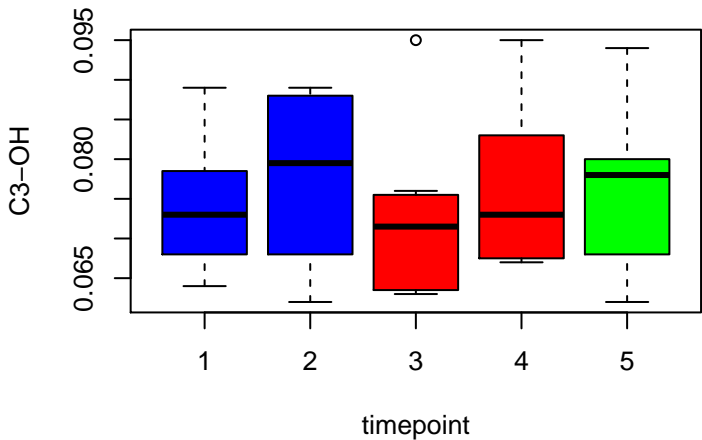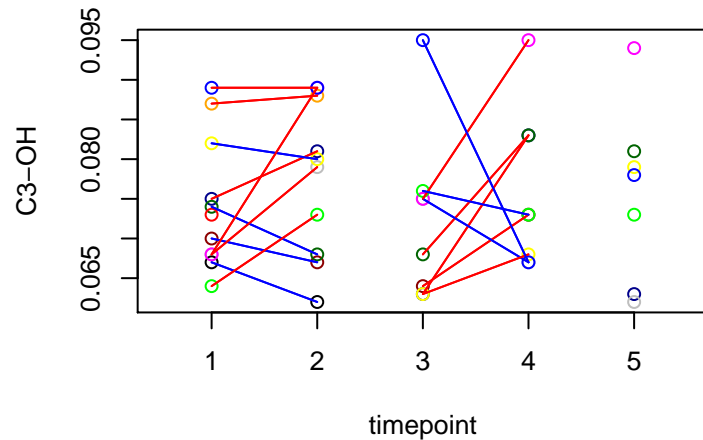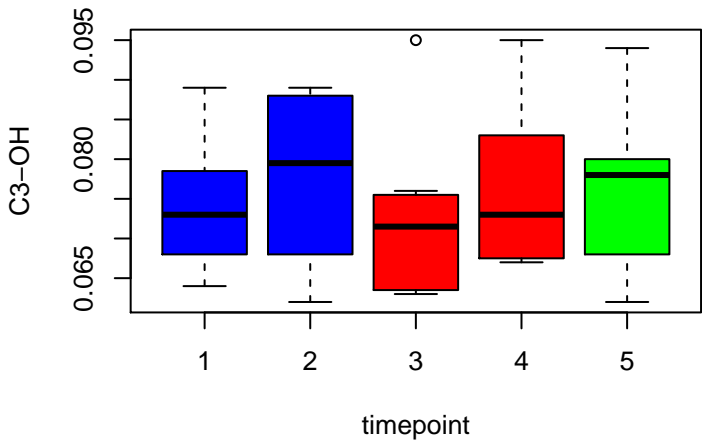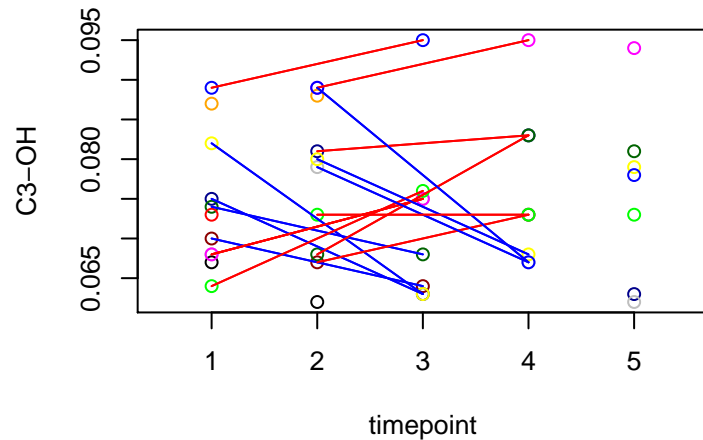

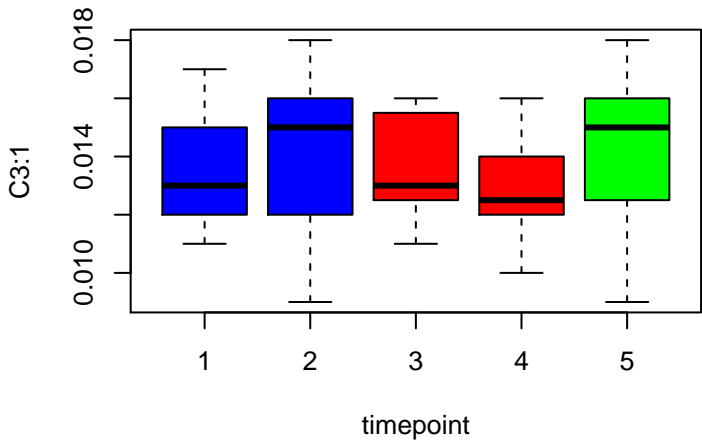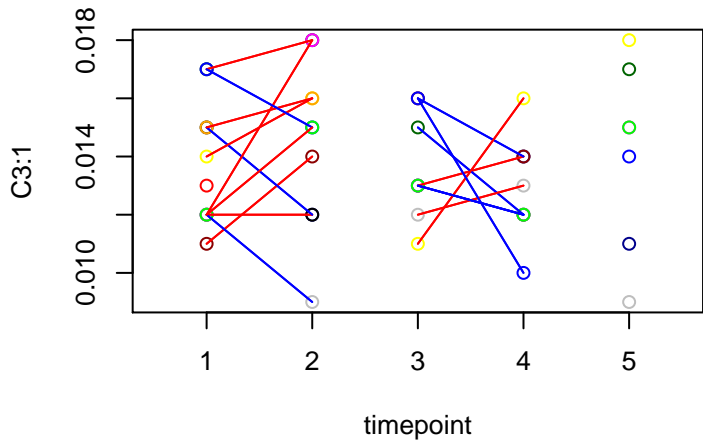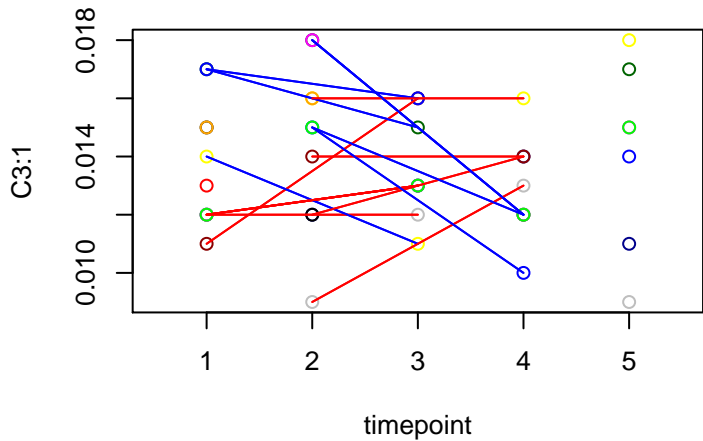

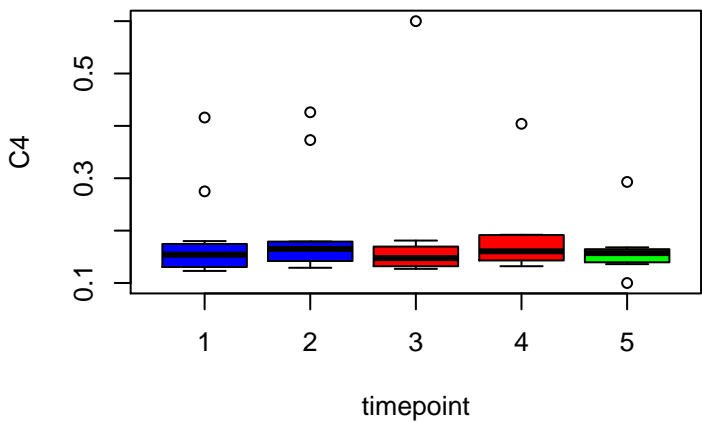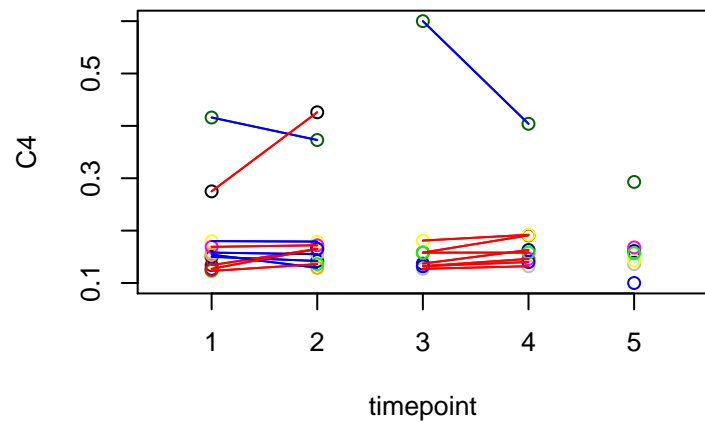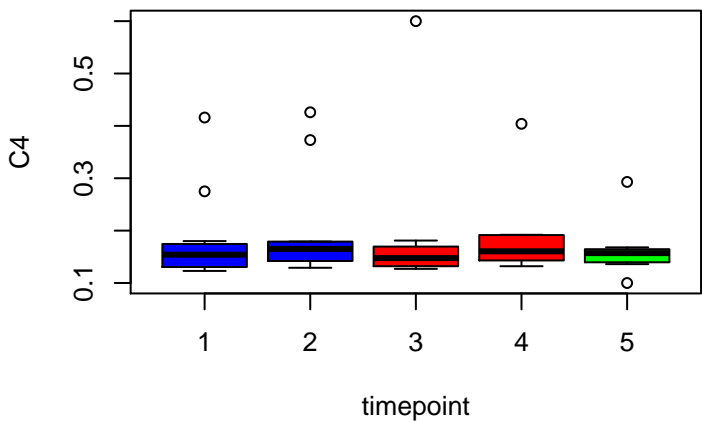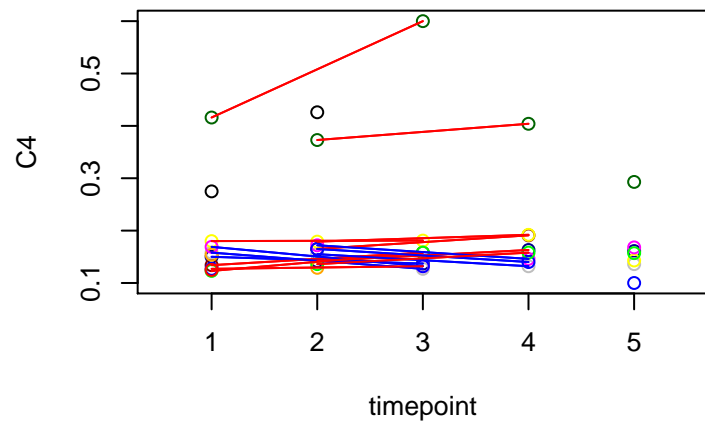

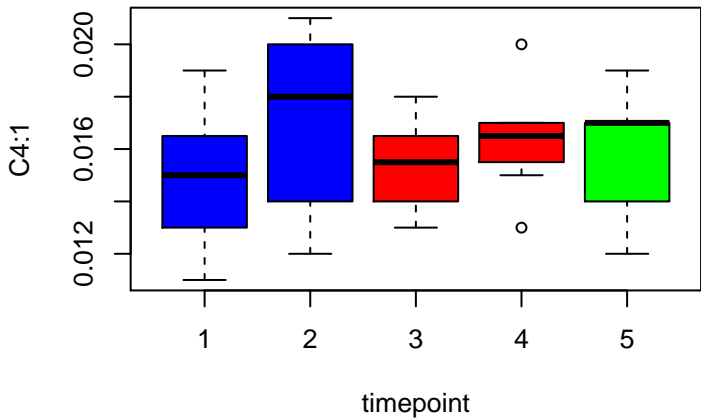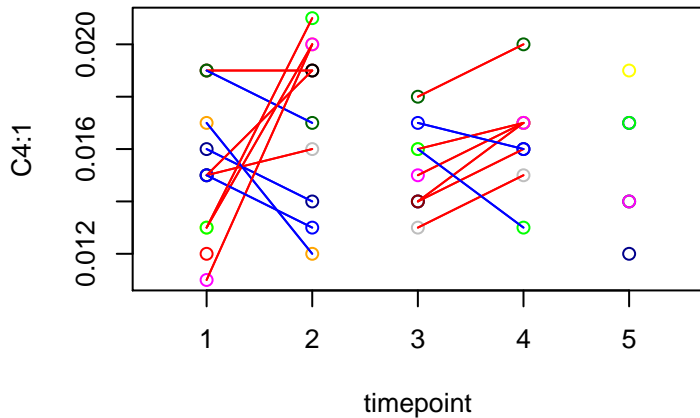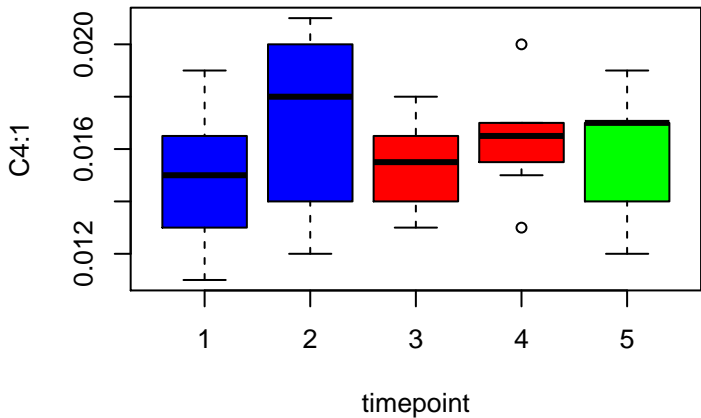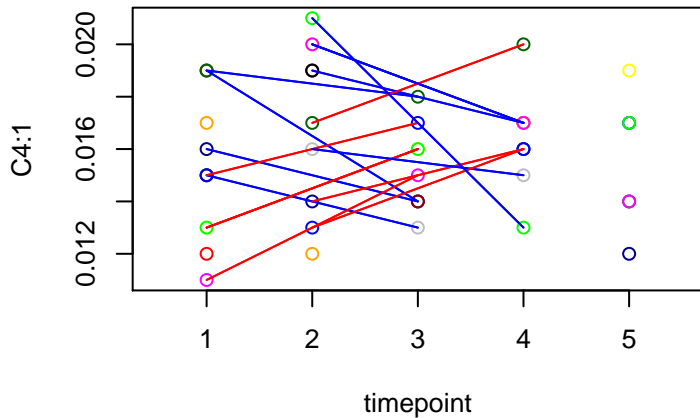



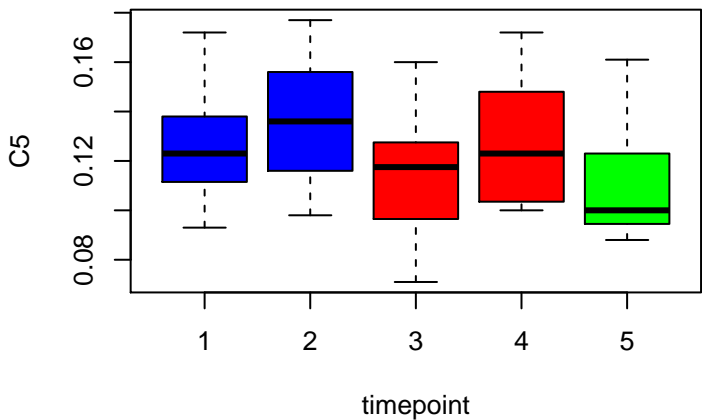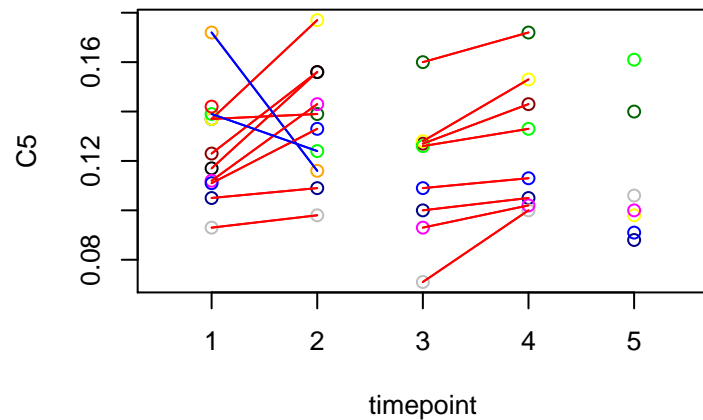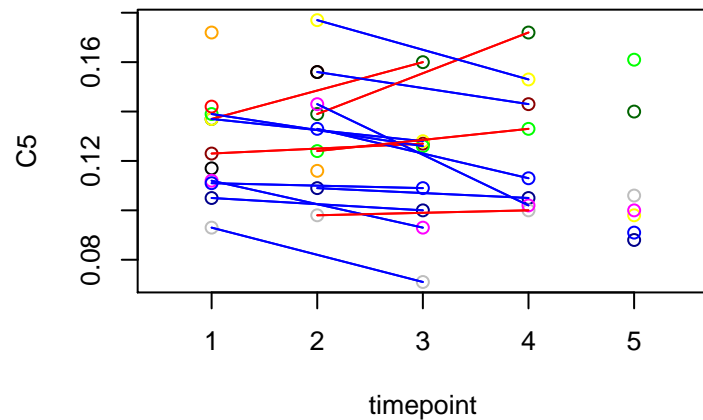

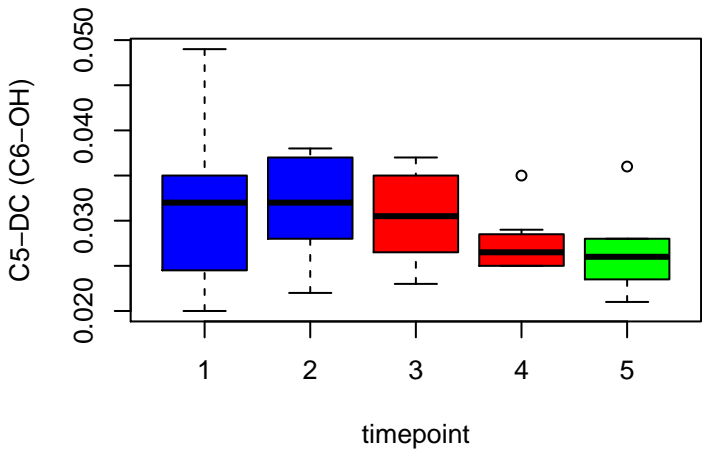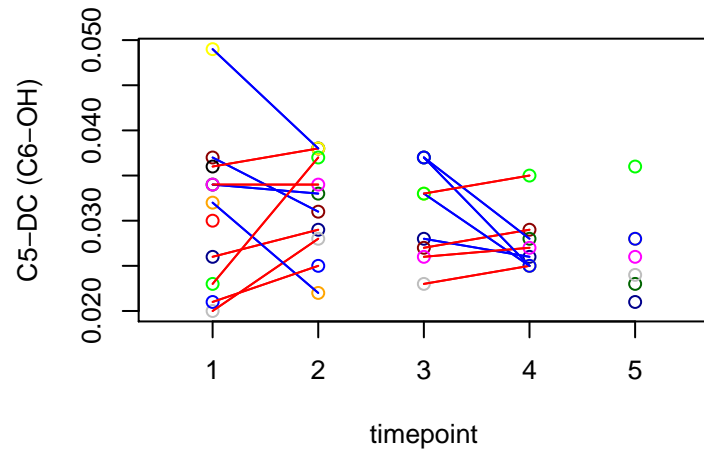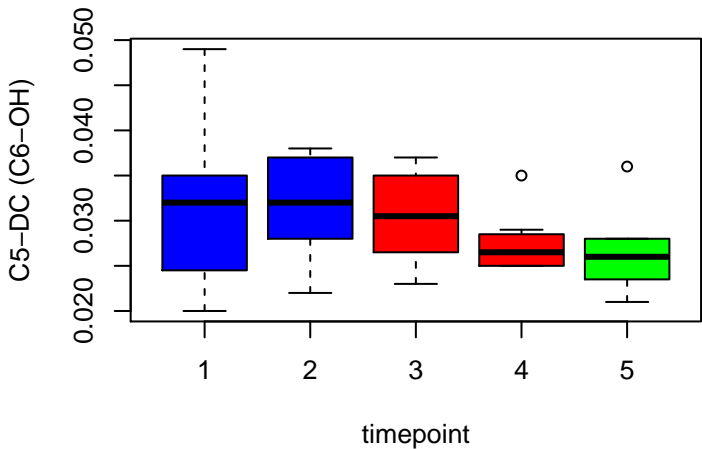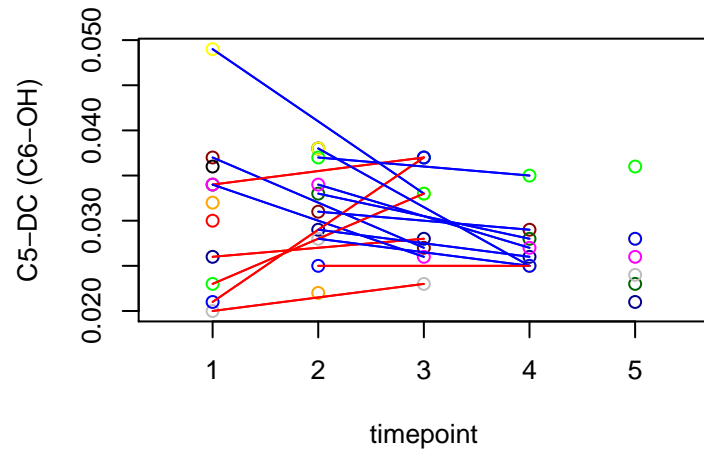

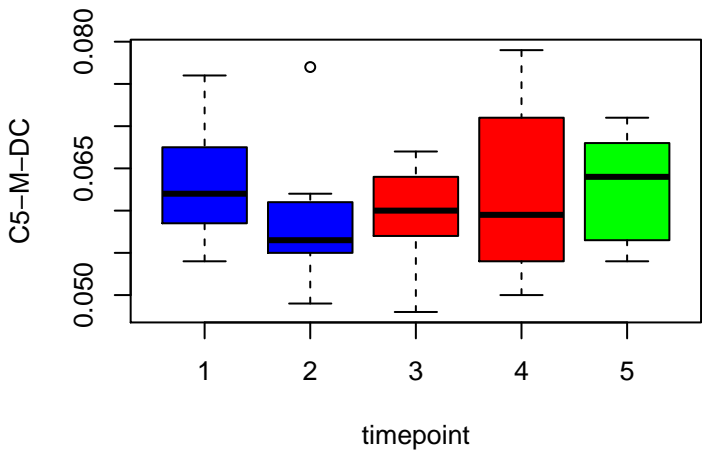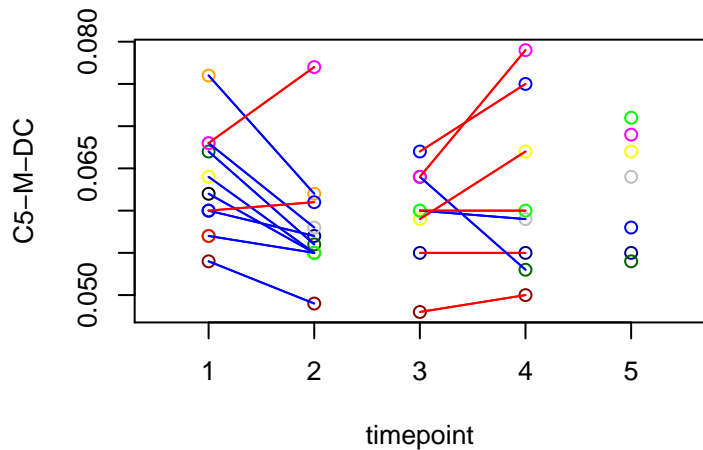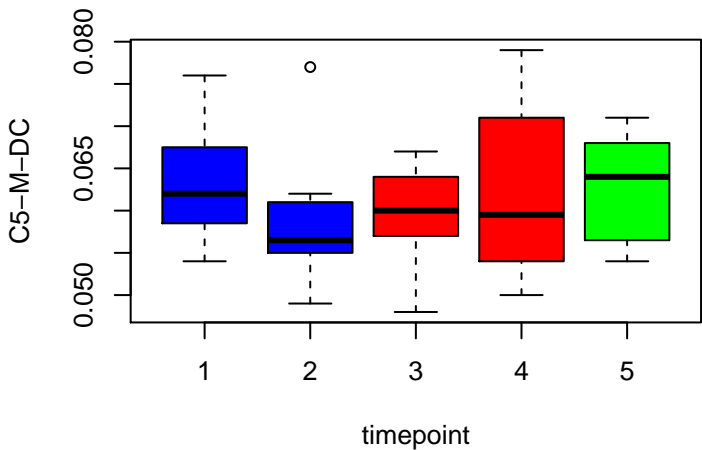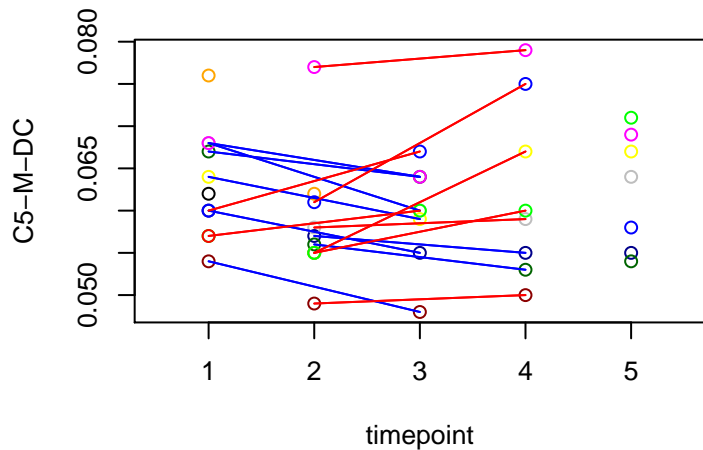

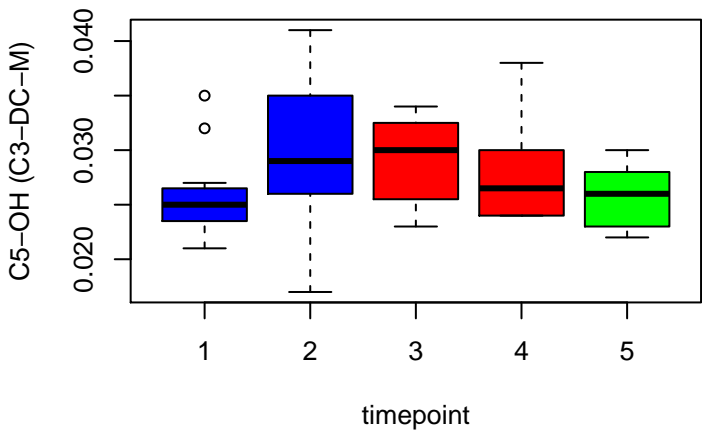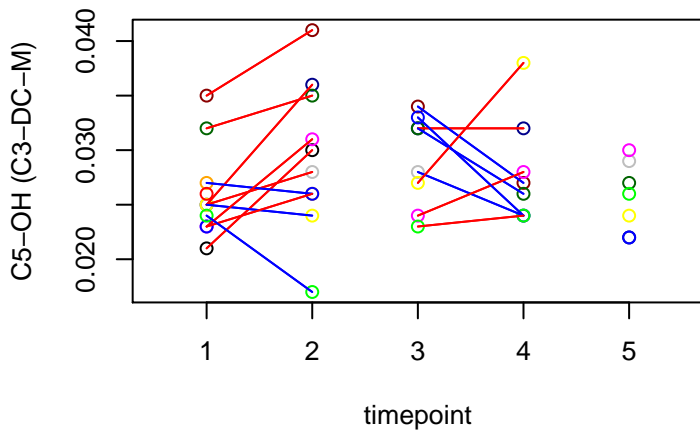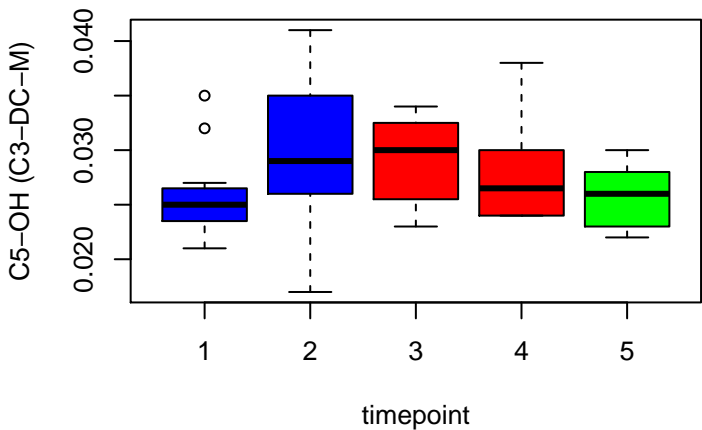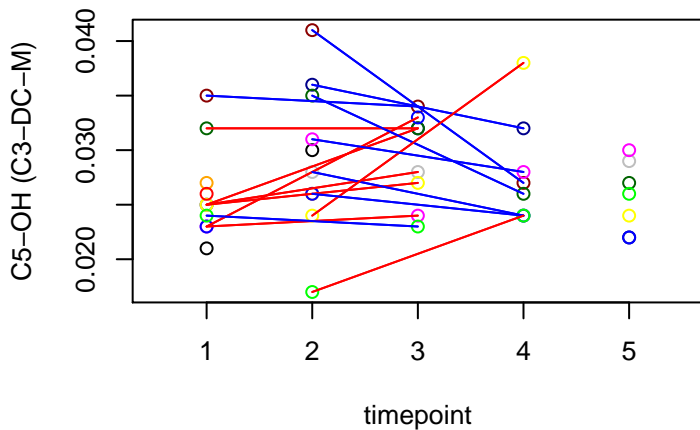

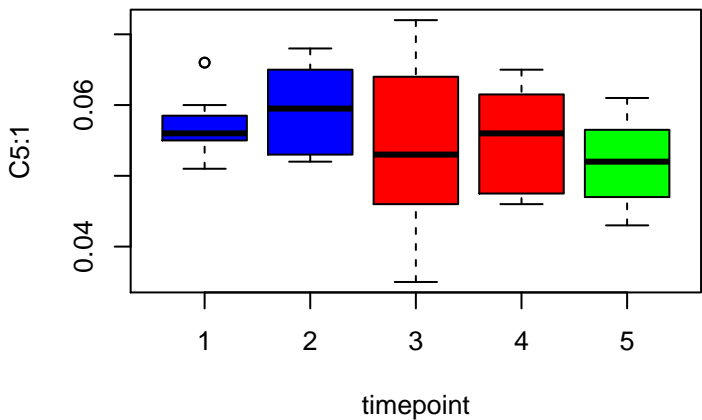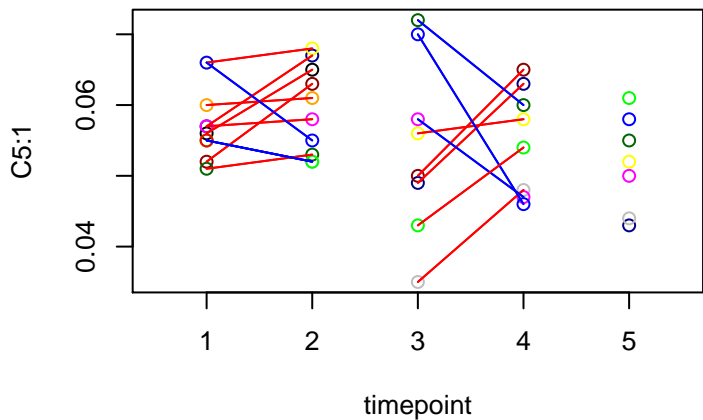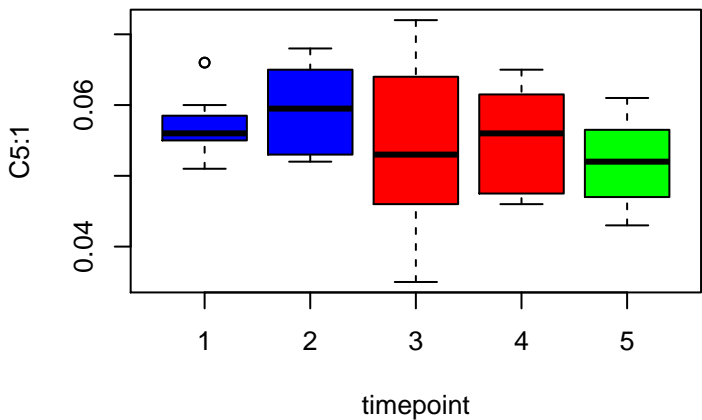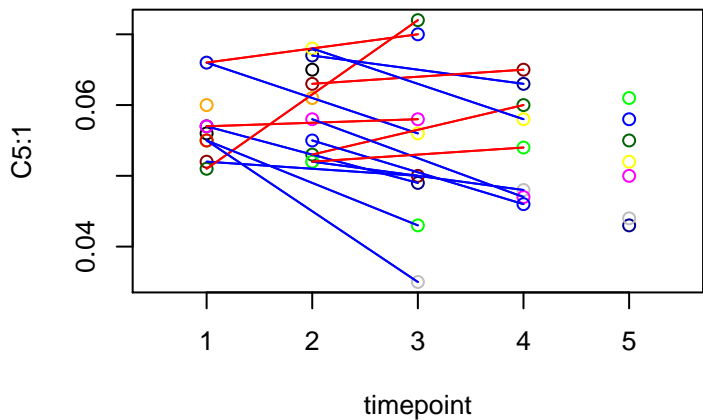

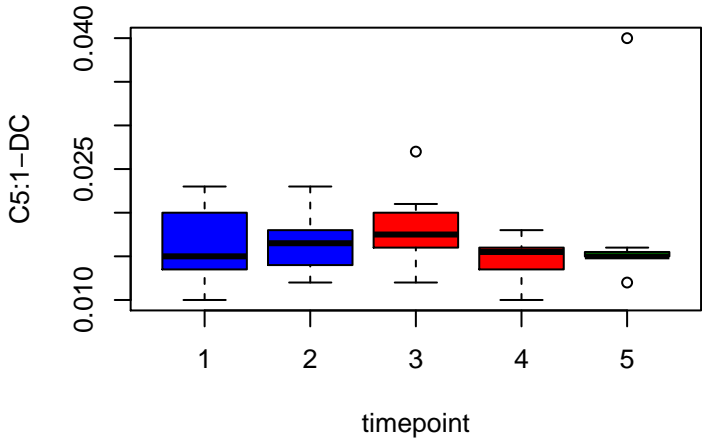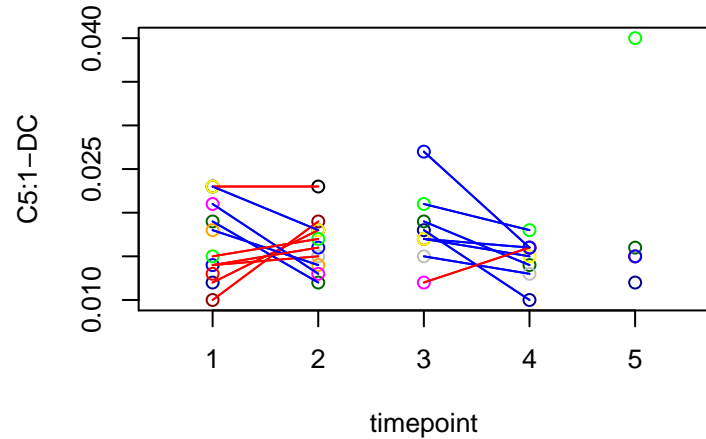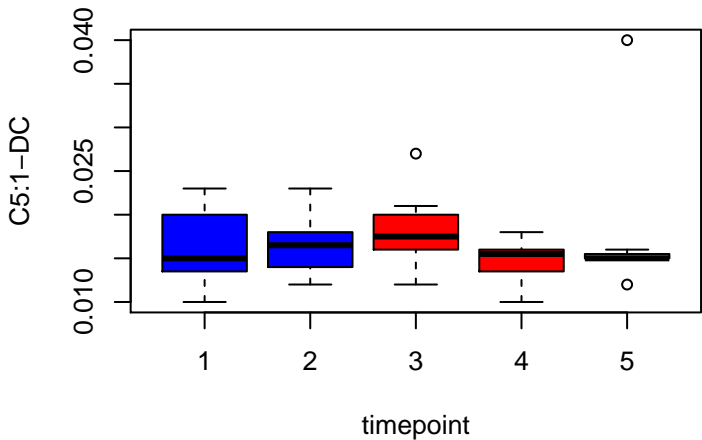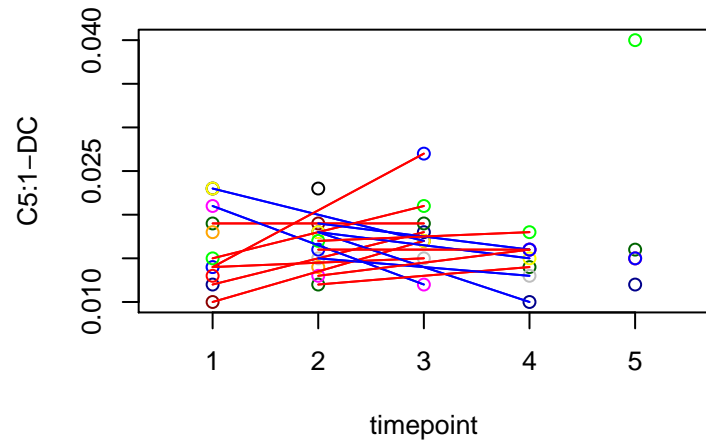

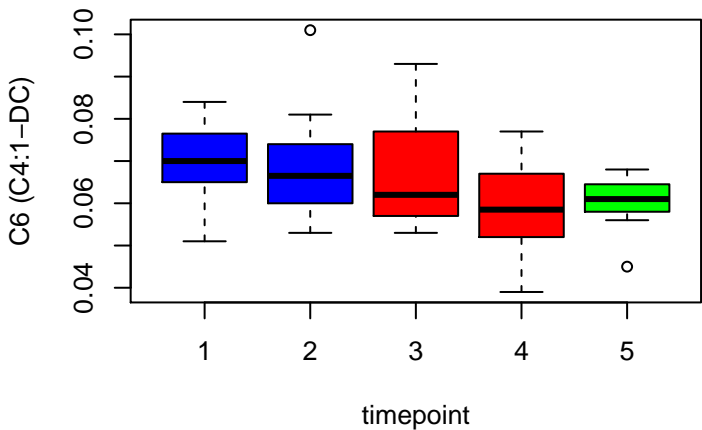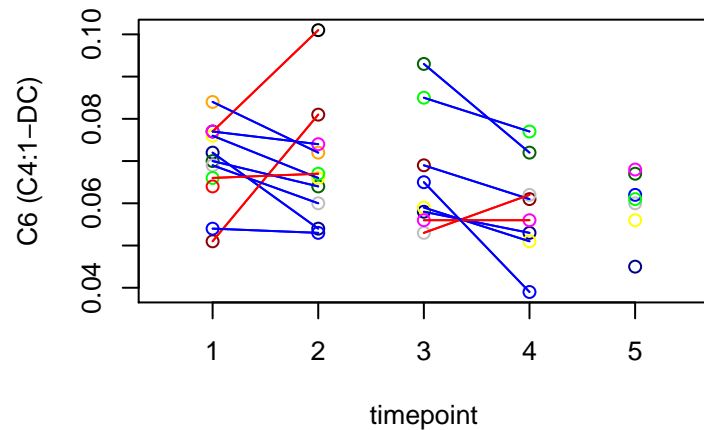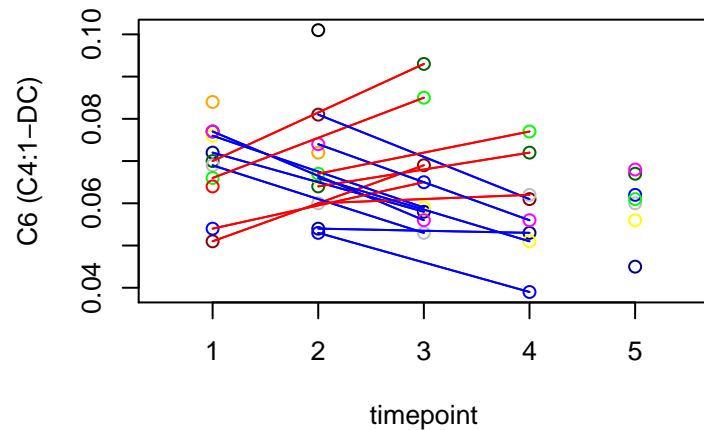

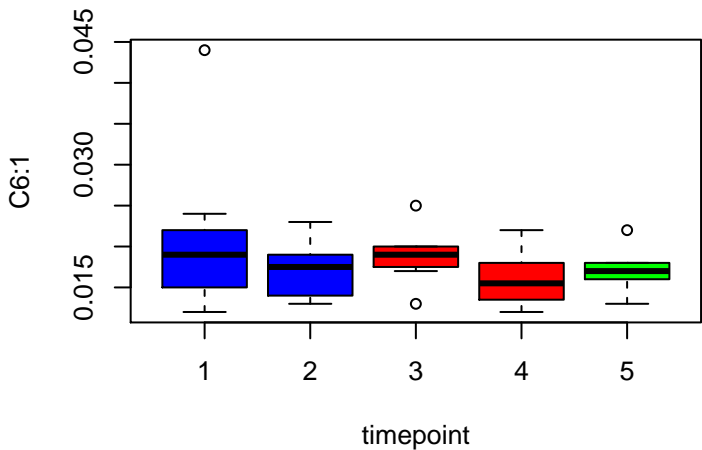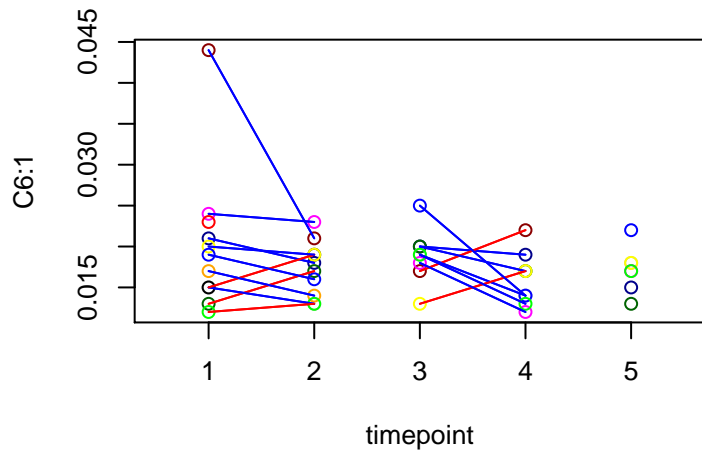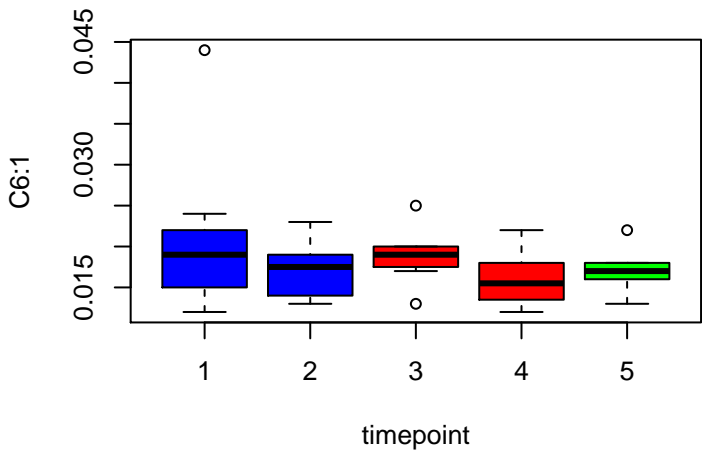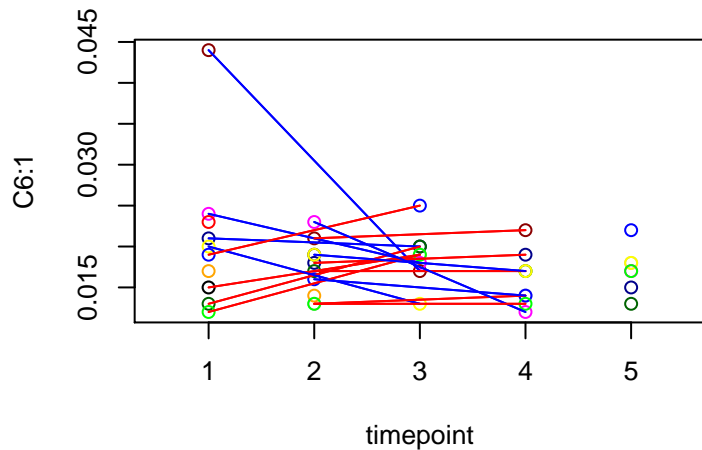





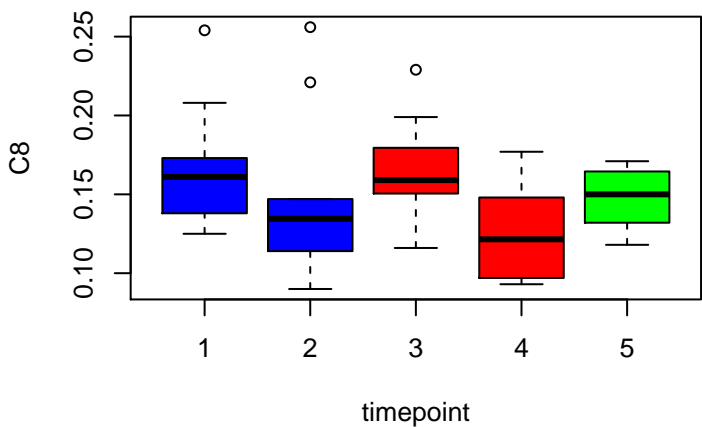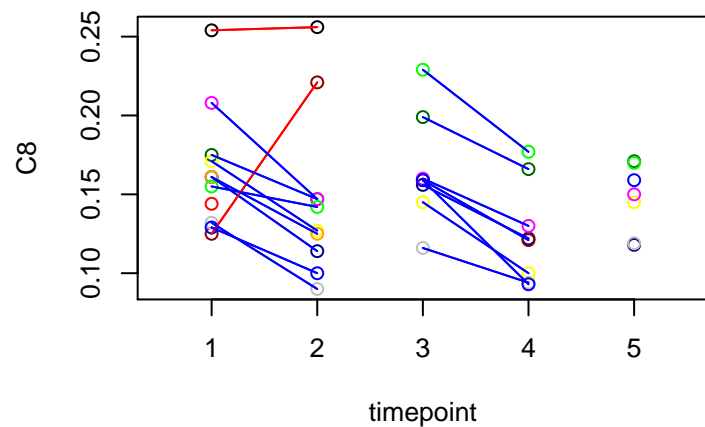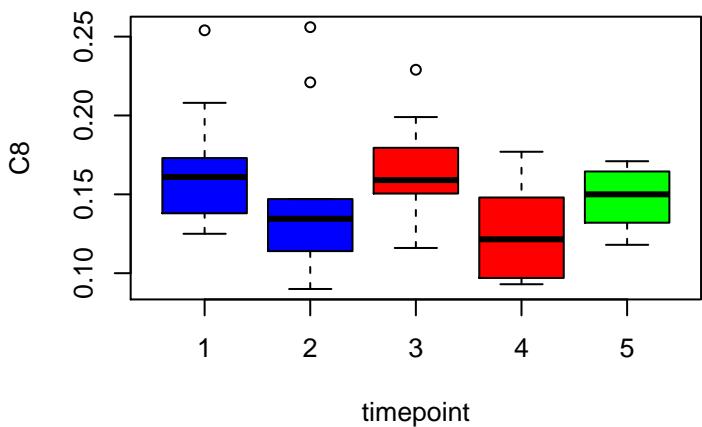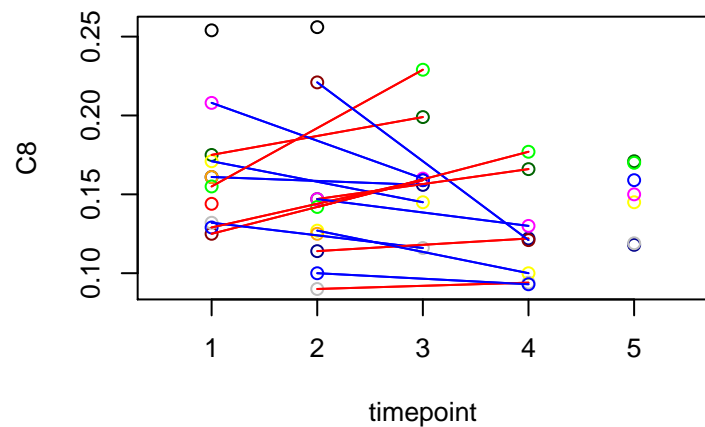

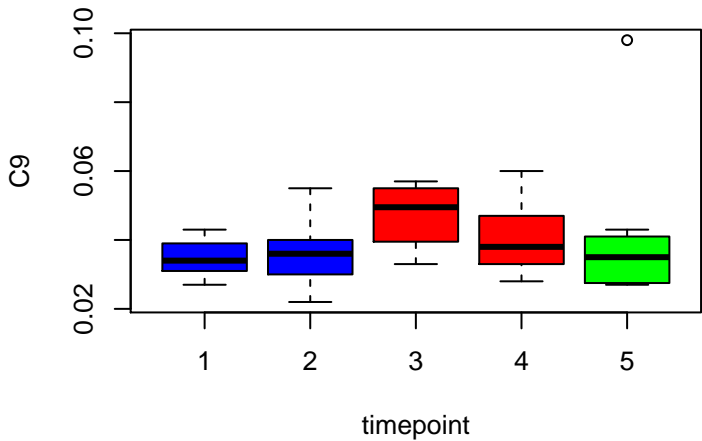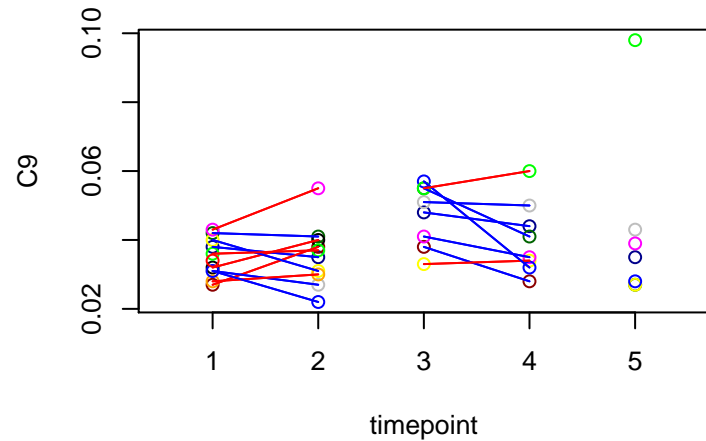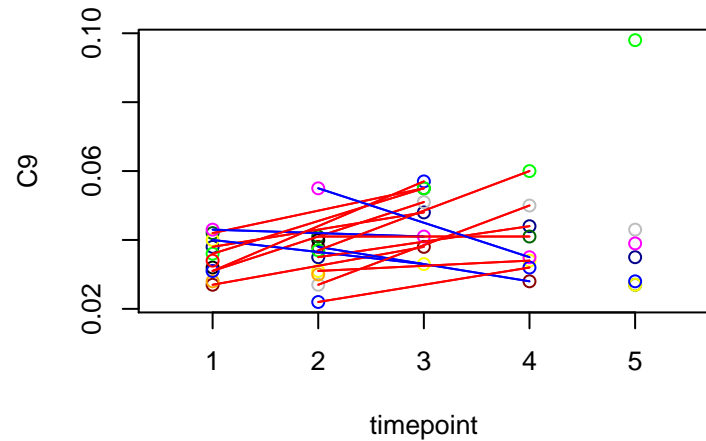

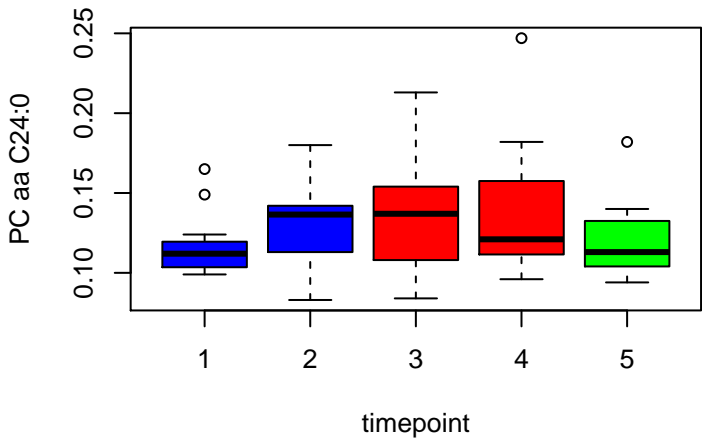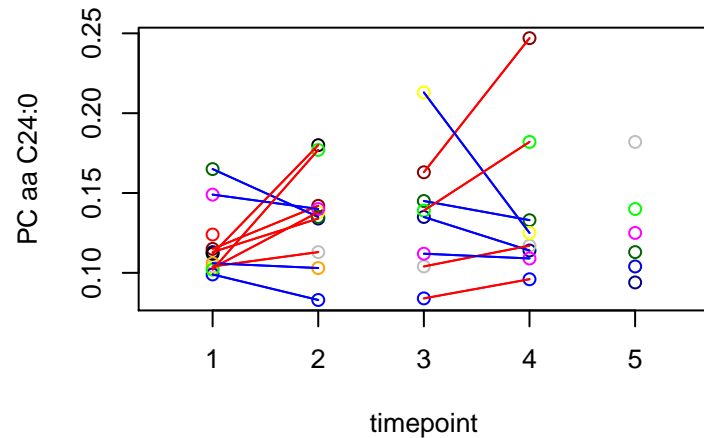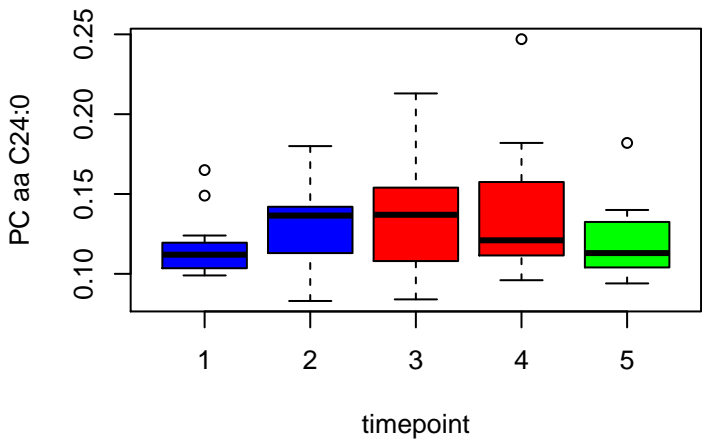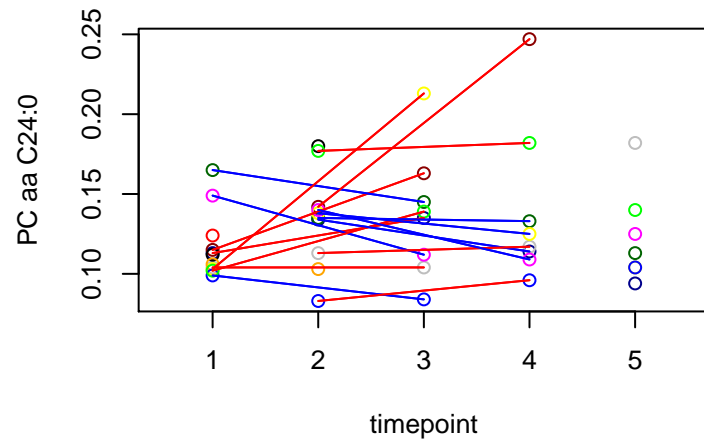

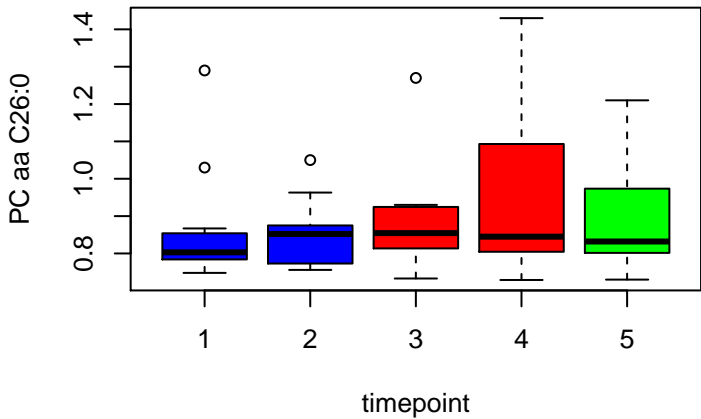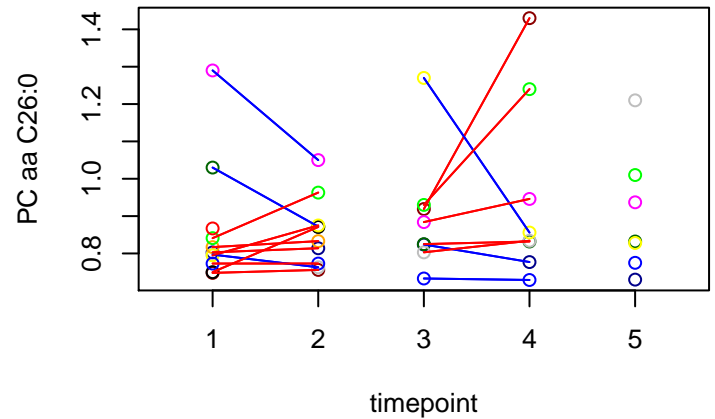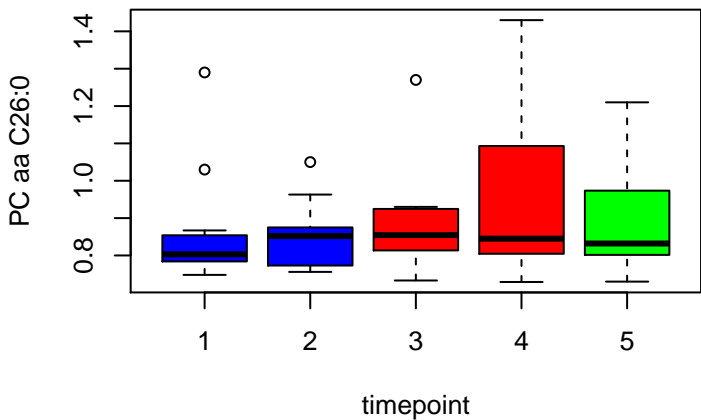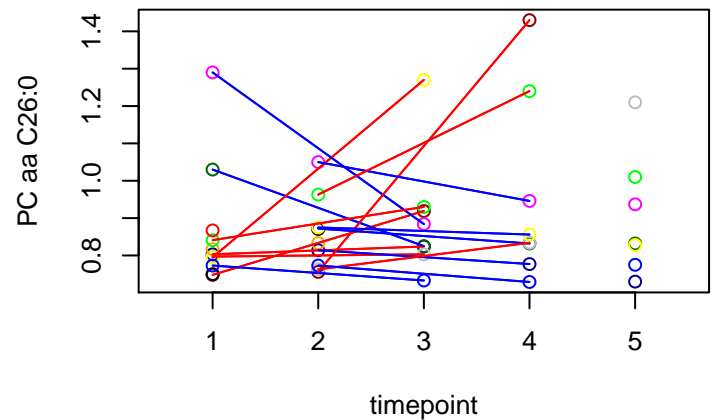

PC aa C28:1

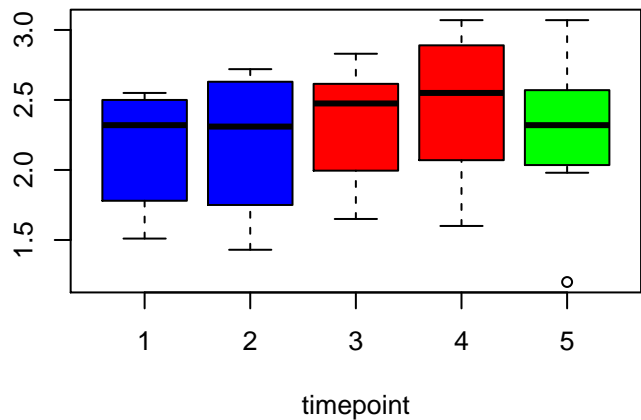

PC aa C28:1

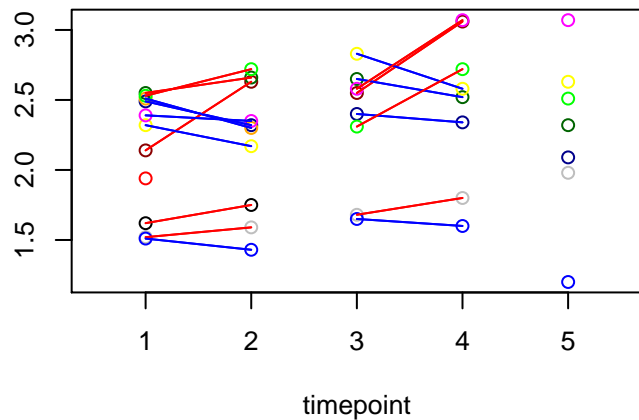

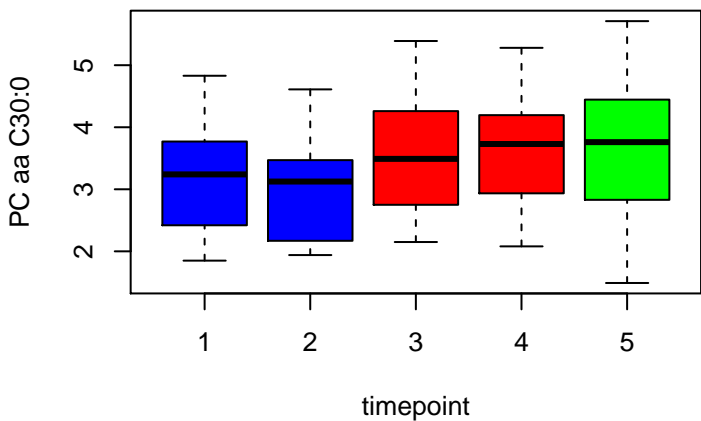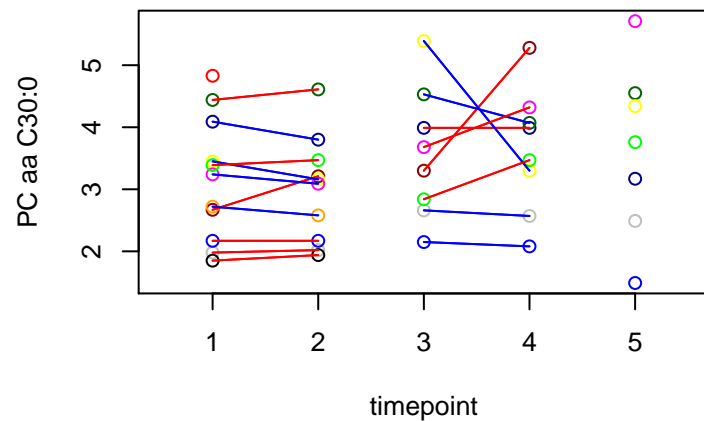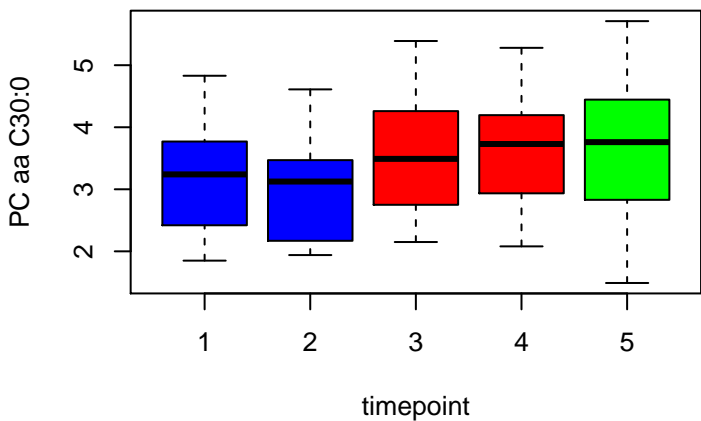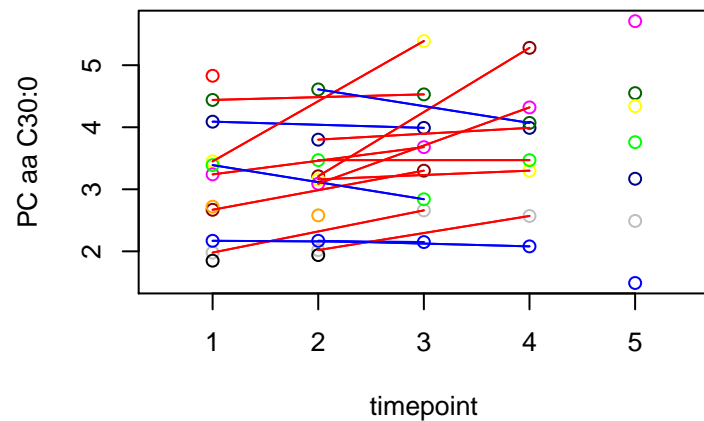

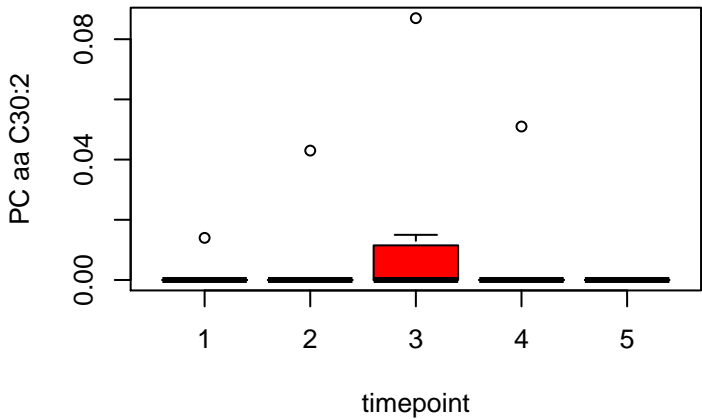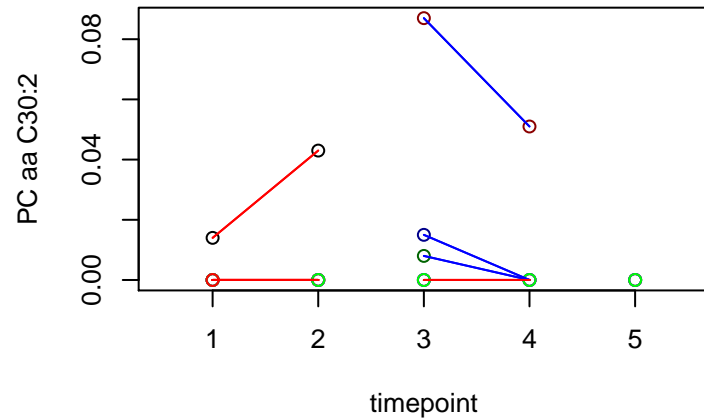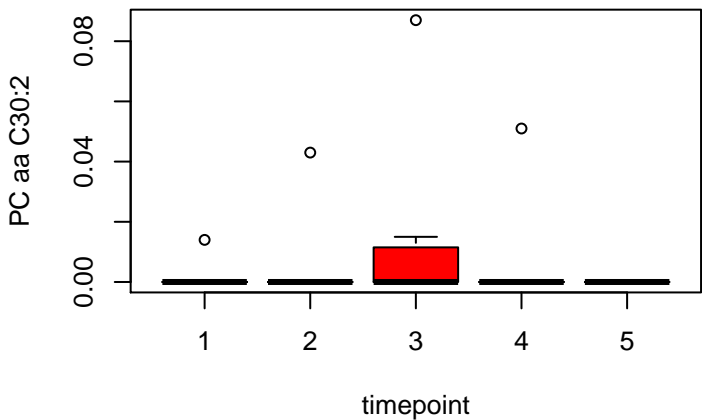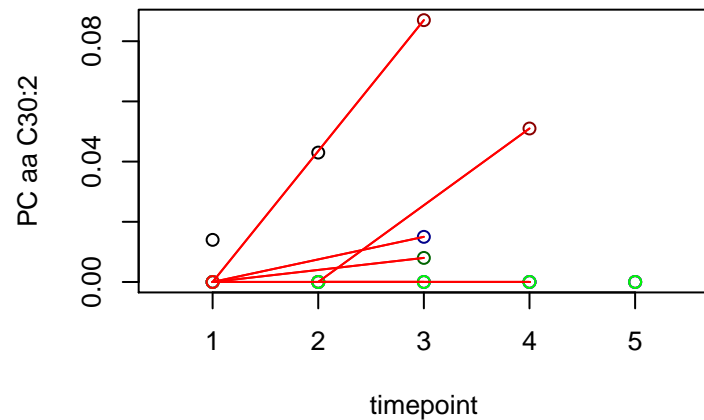



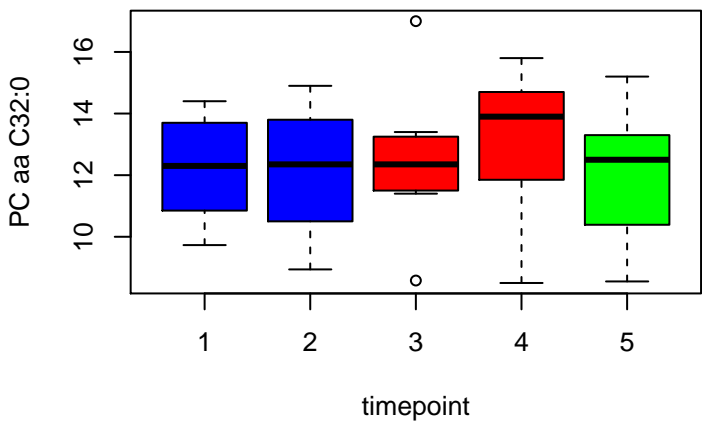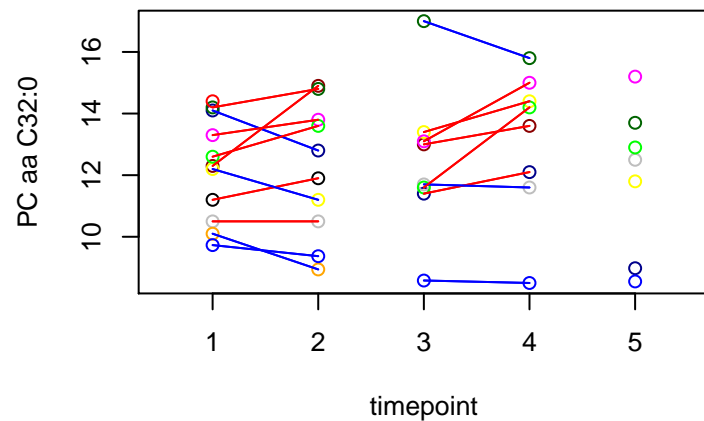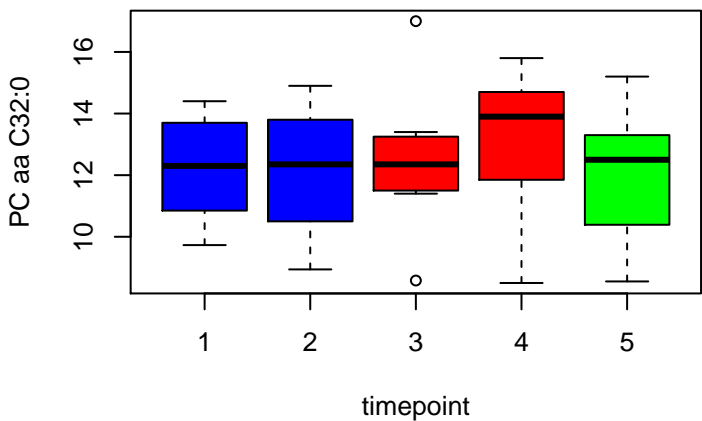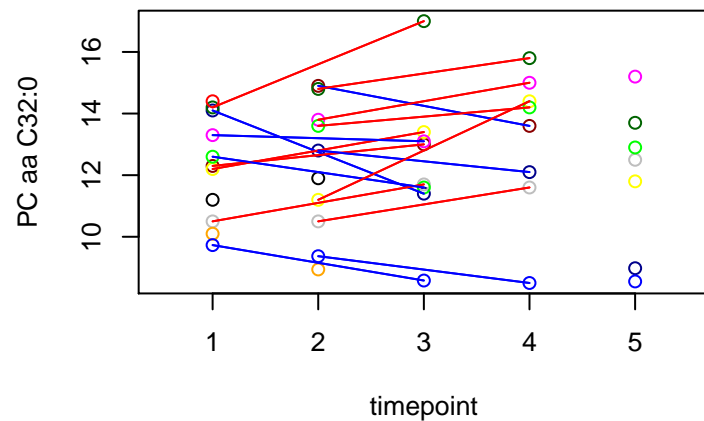

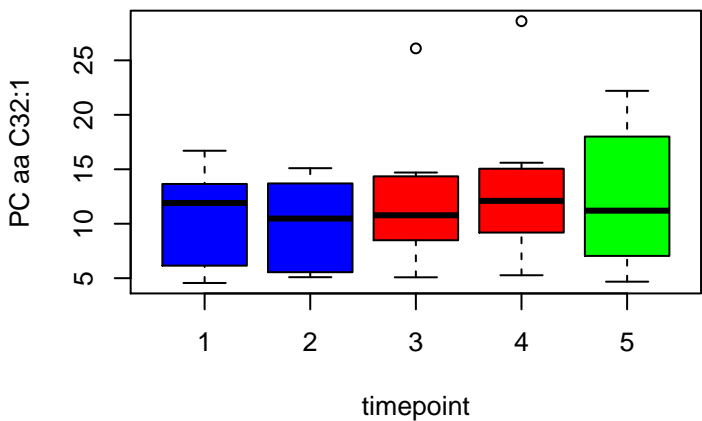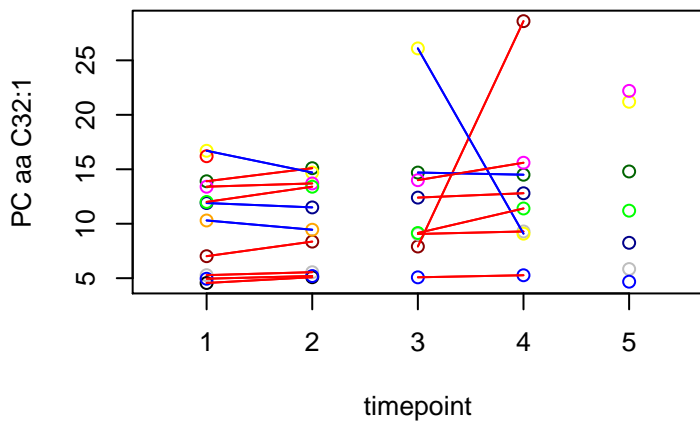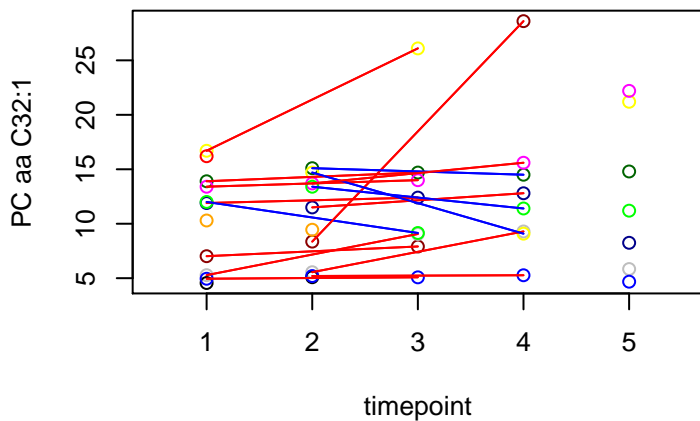

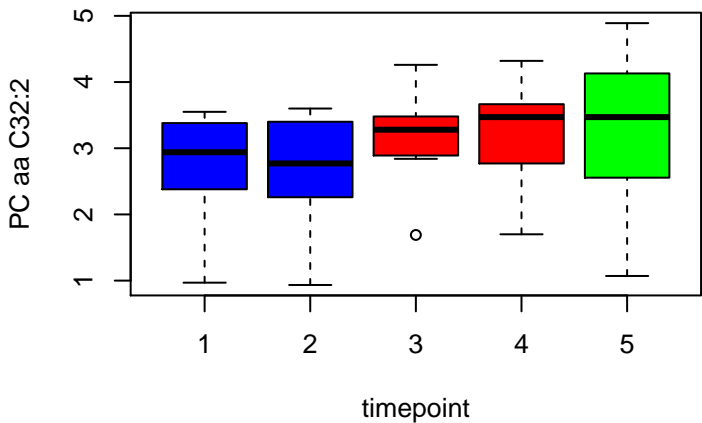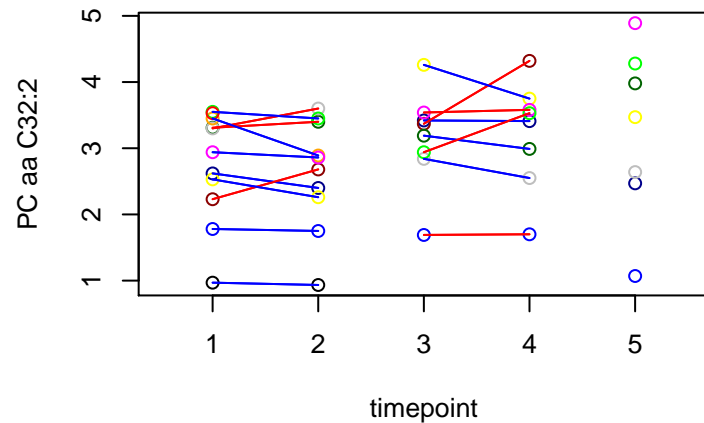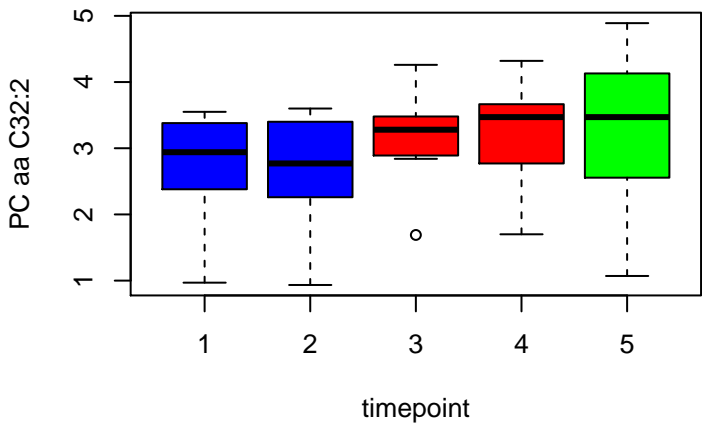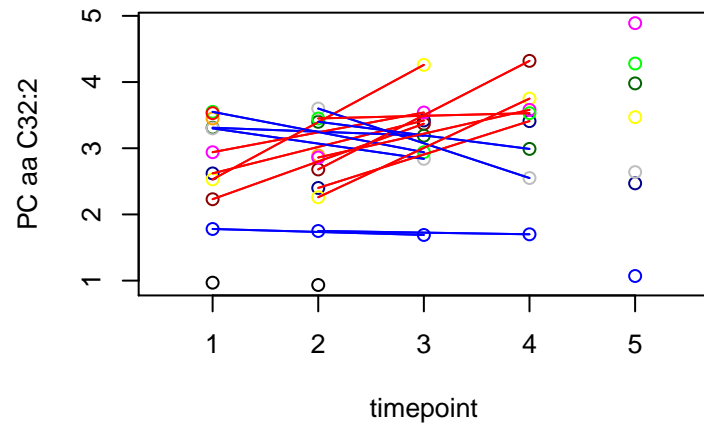

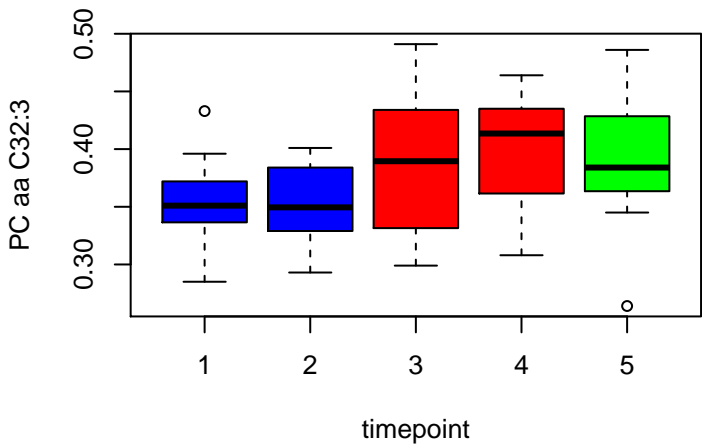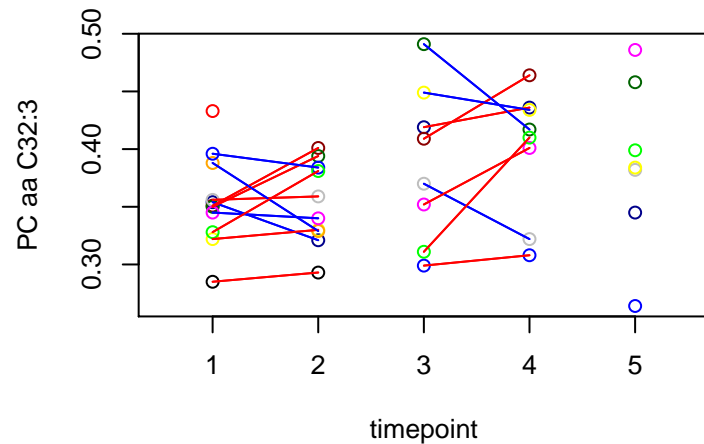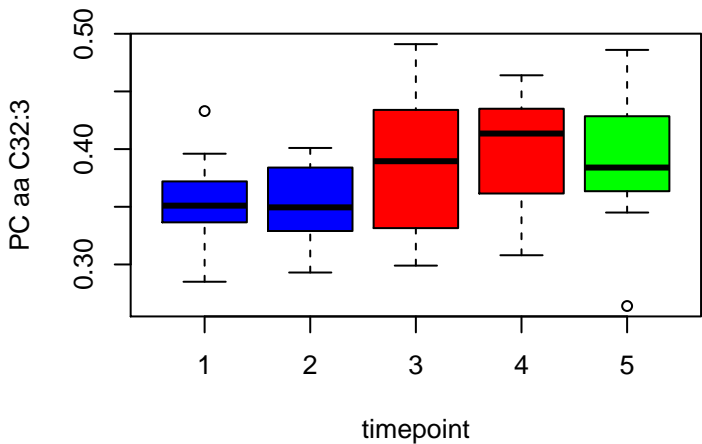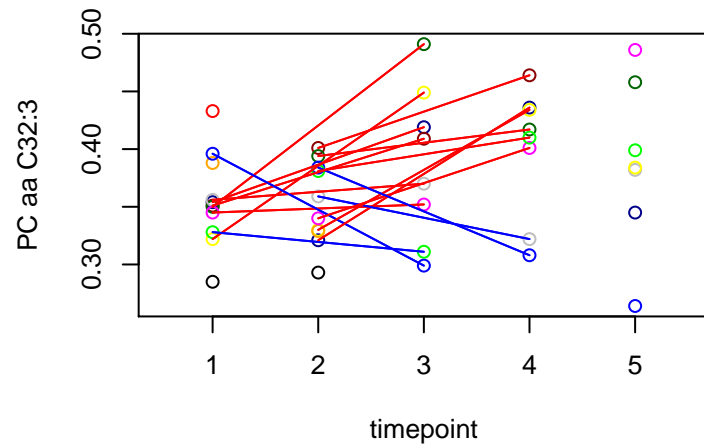

PC aa C34:1

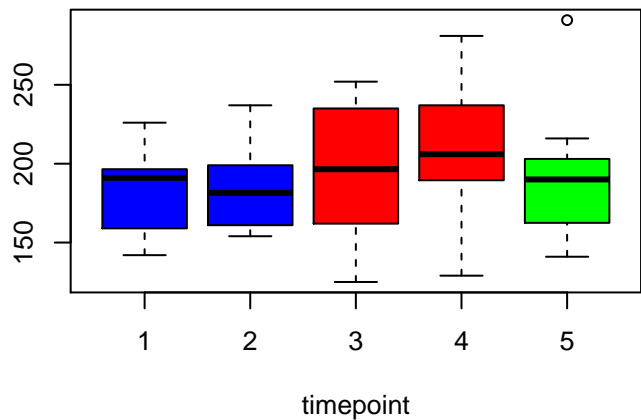

PC aa C34:1

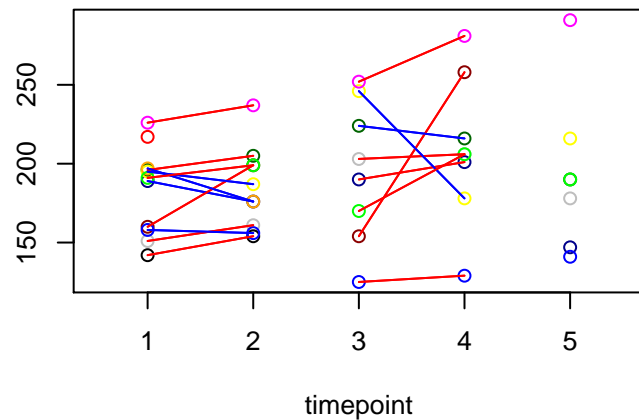

PC aa C34:1

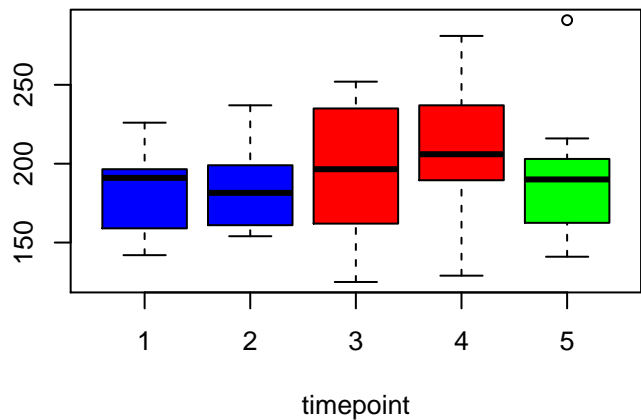

PC aa C34:1

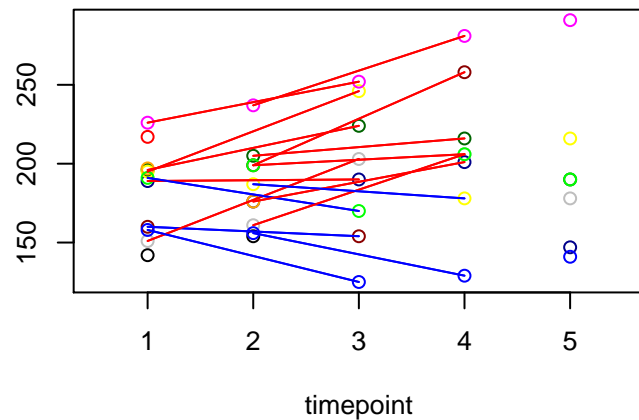

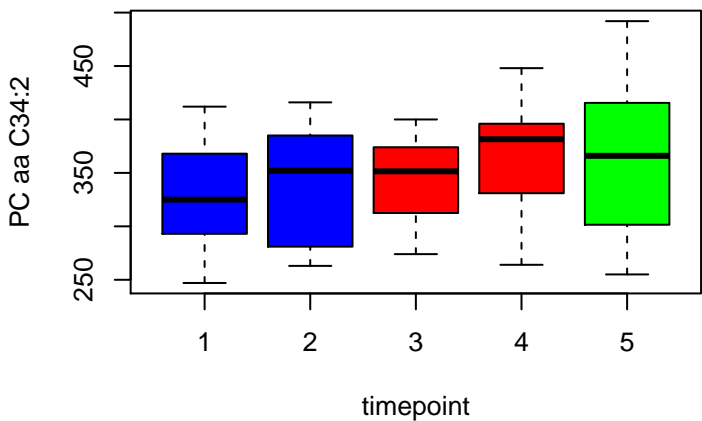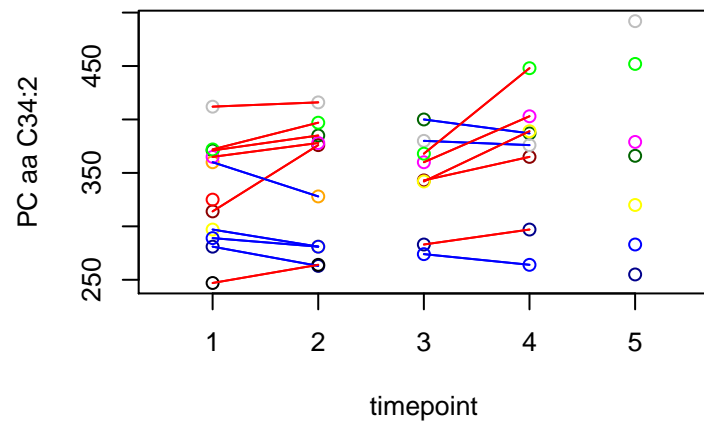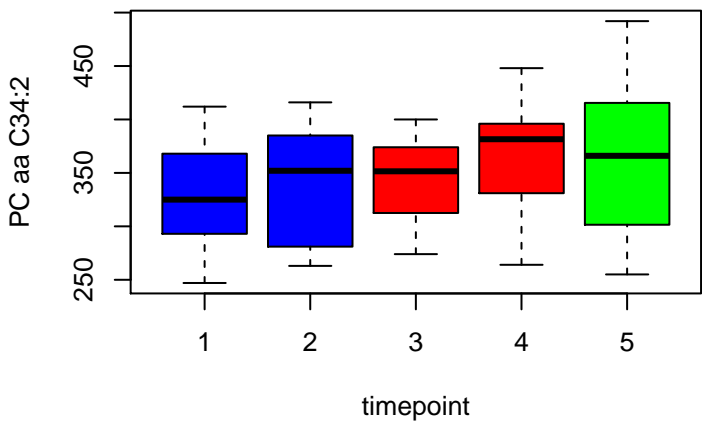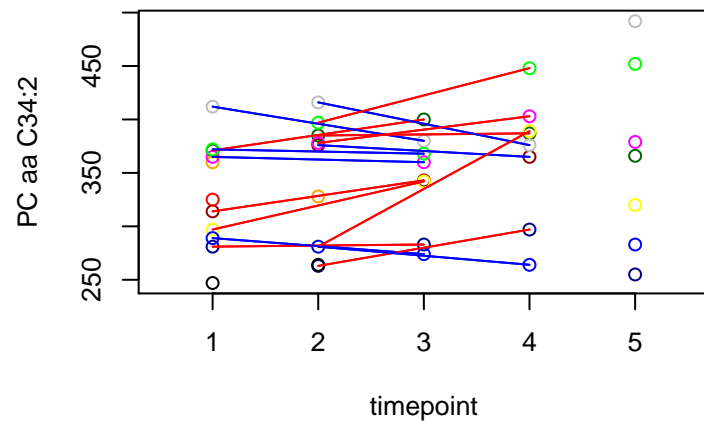

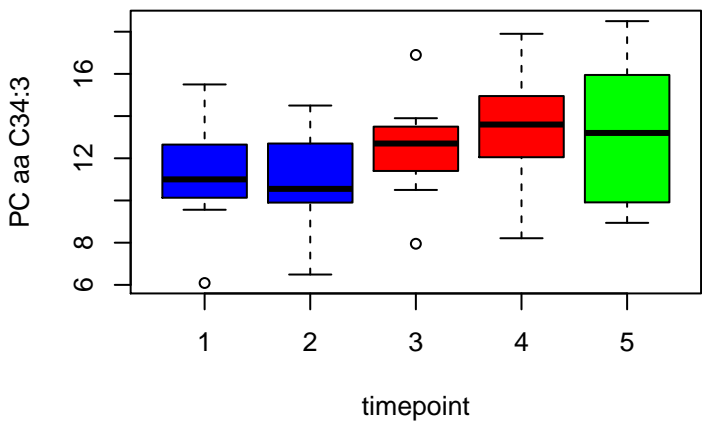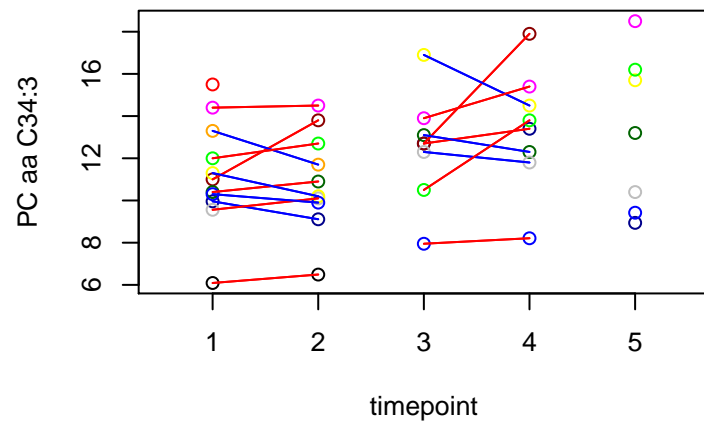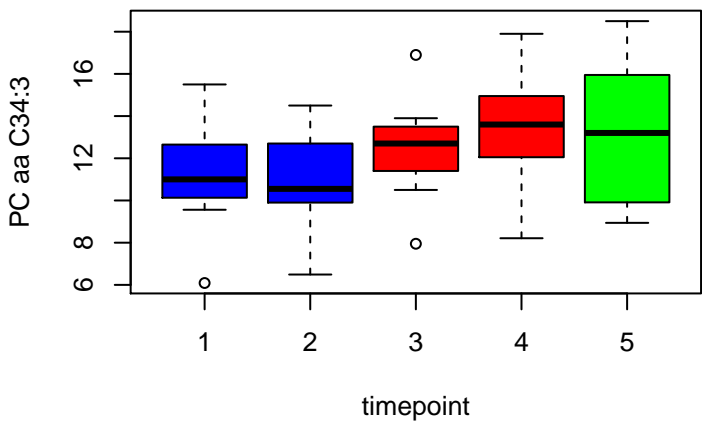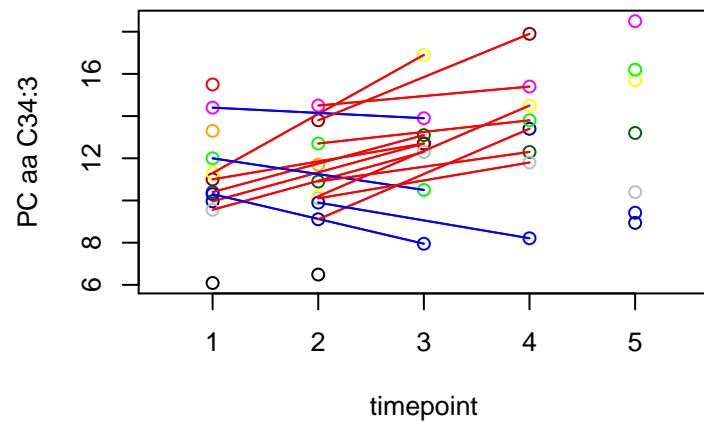

PC aa C34:4

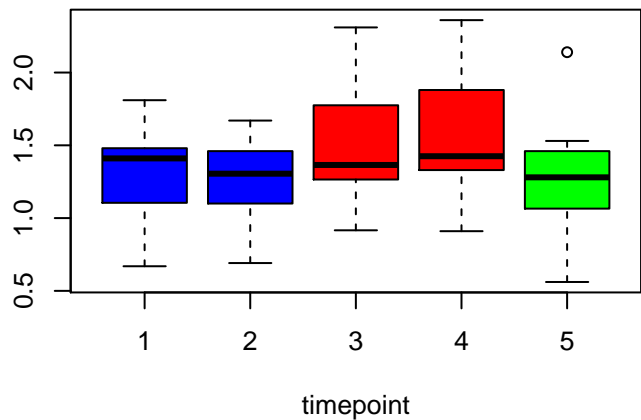

PC aa C34:4

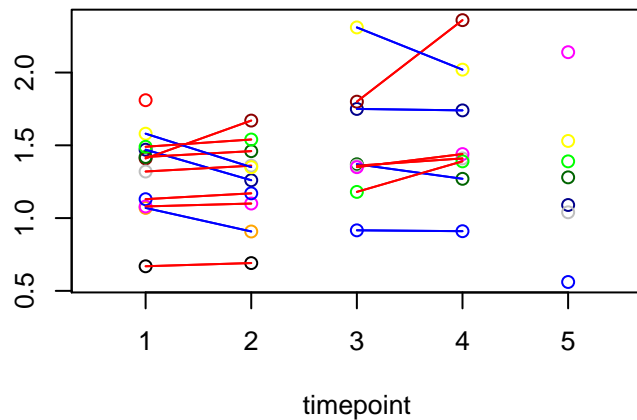

PC aa C34:4



PC aa C34:4

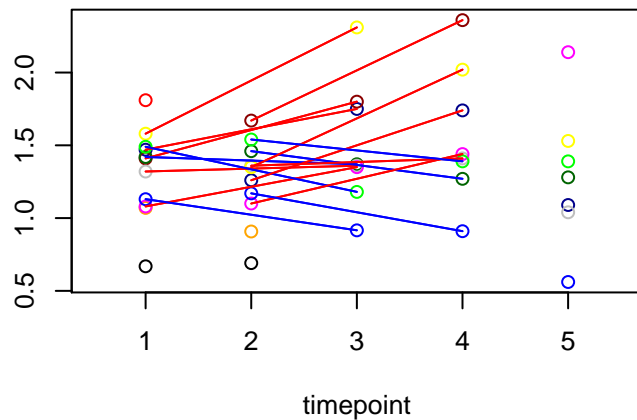



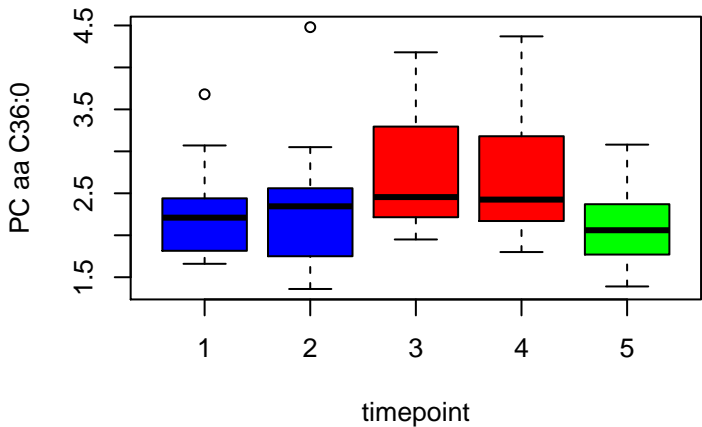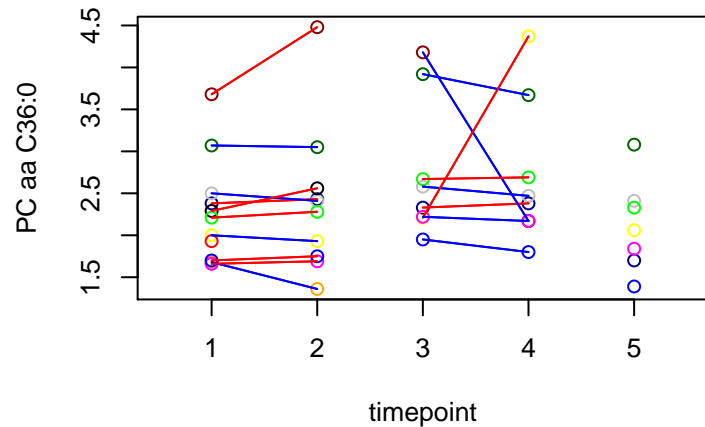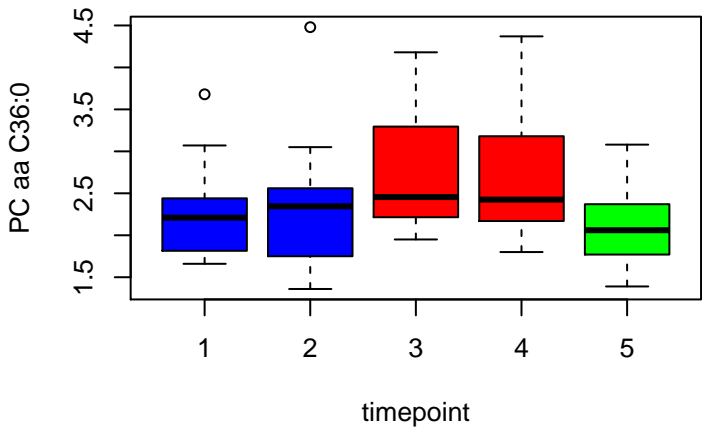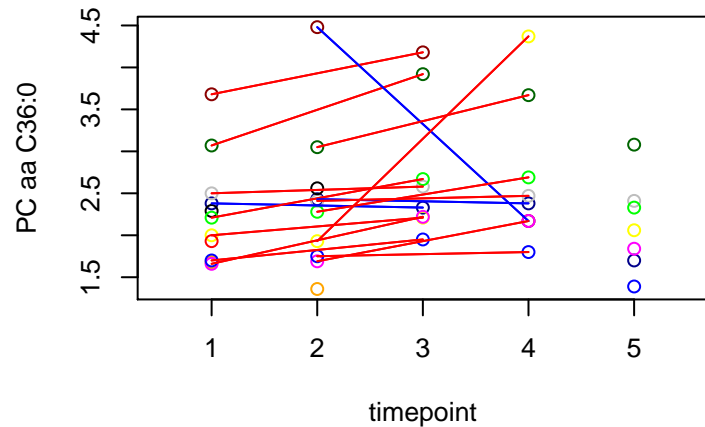

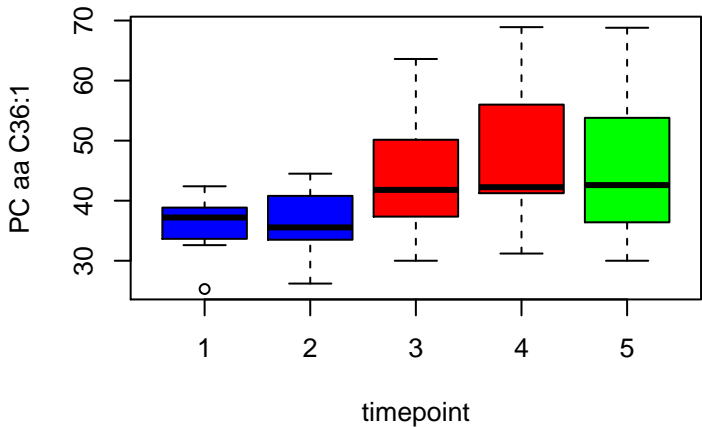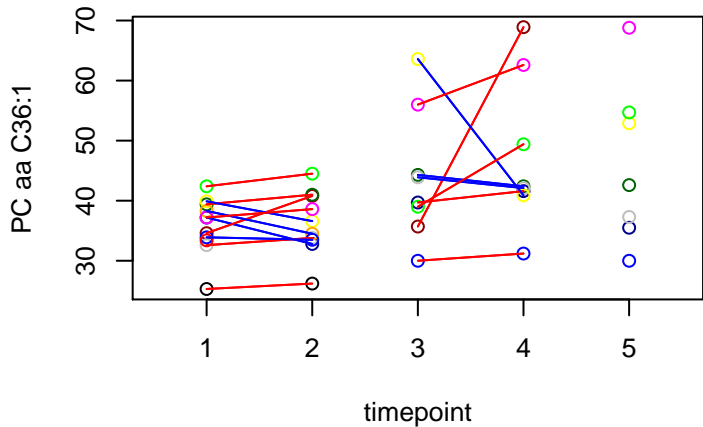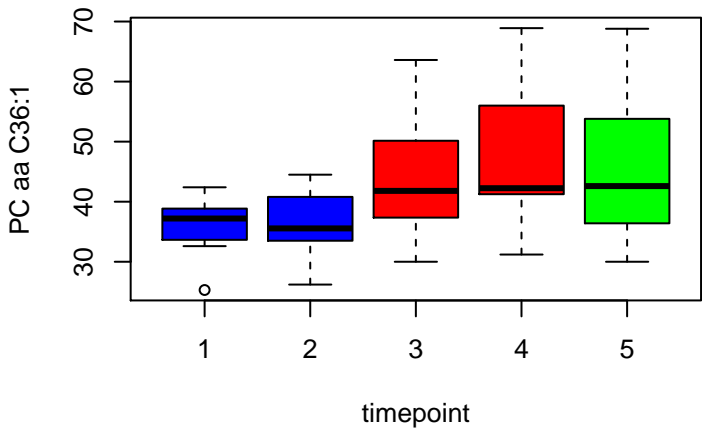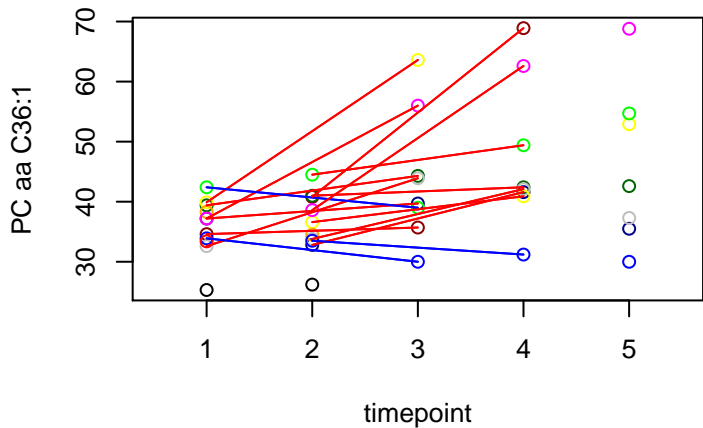

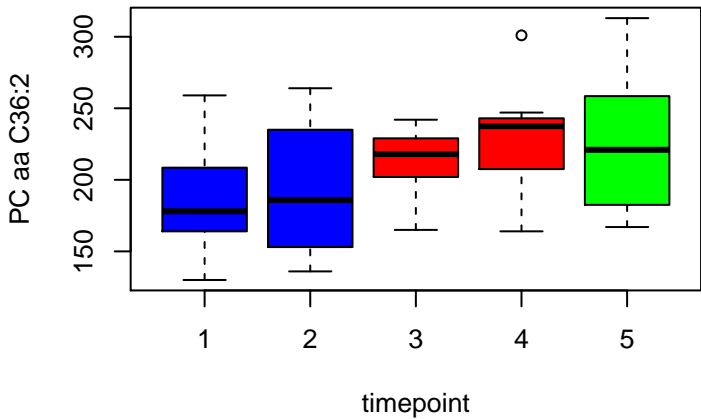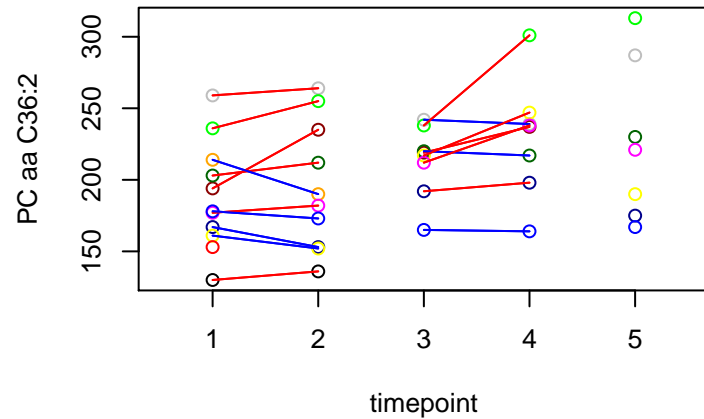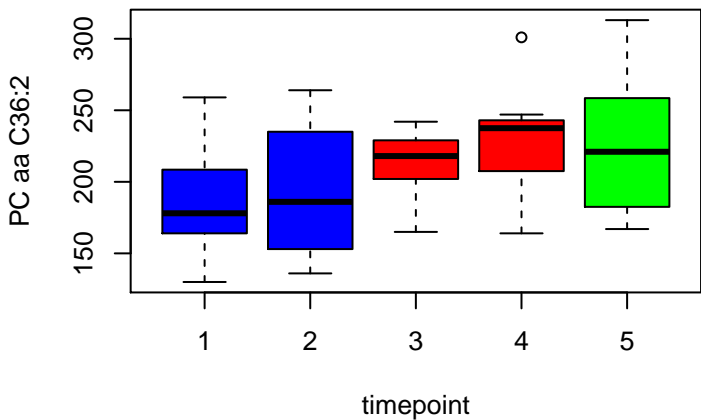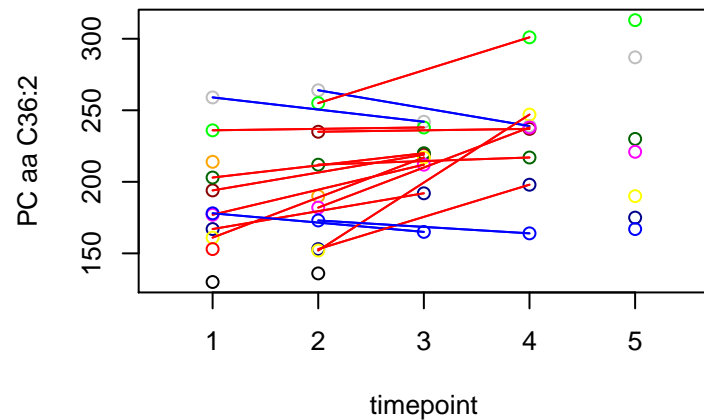

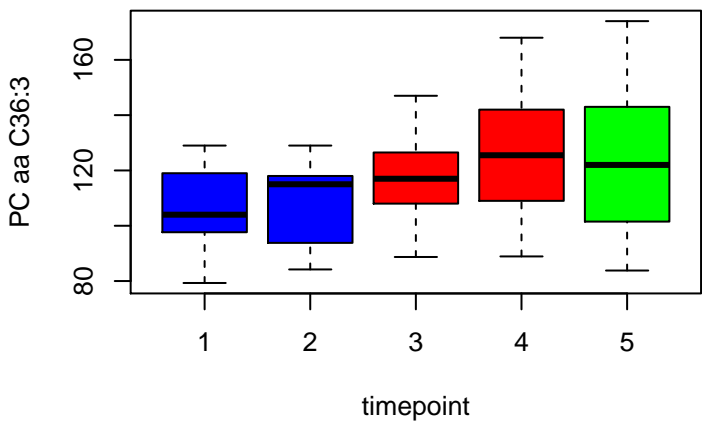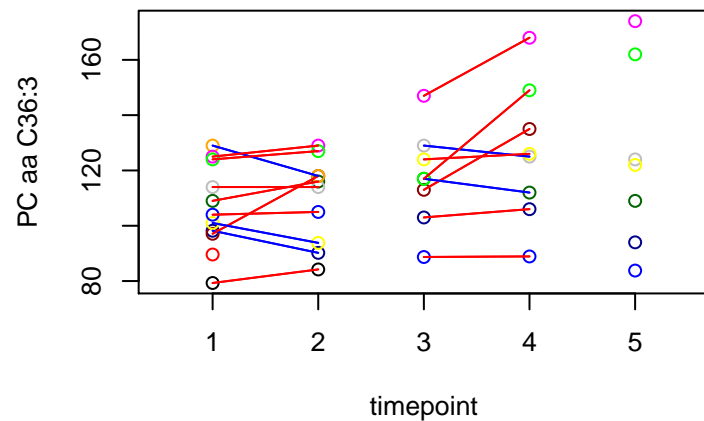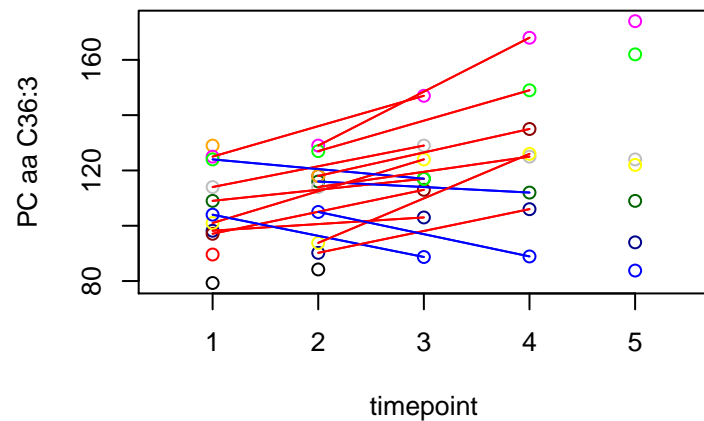

PC aa C36:4

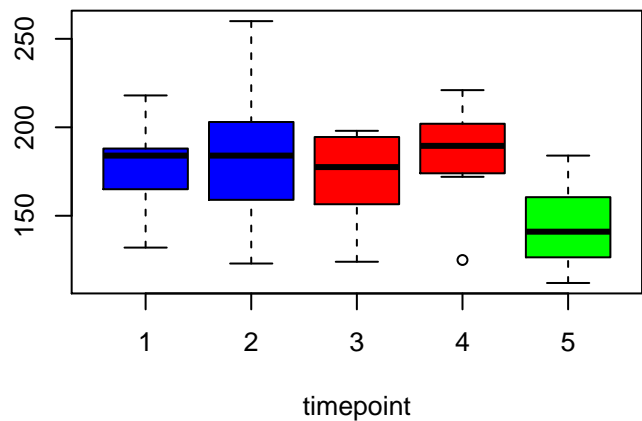

PC aa C36:4

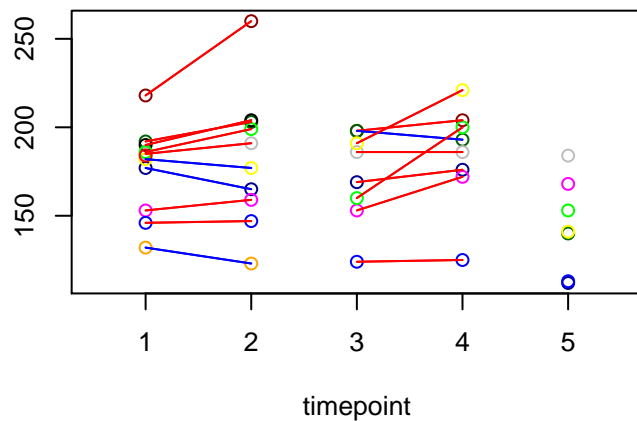

PC aa C36:4



PC aa C36:4

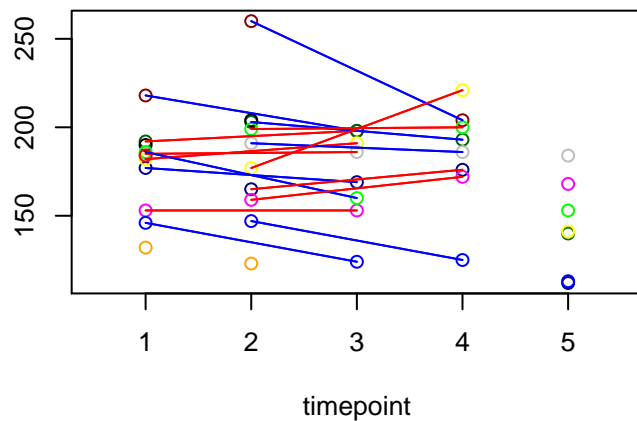

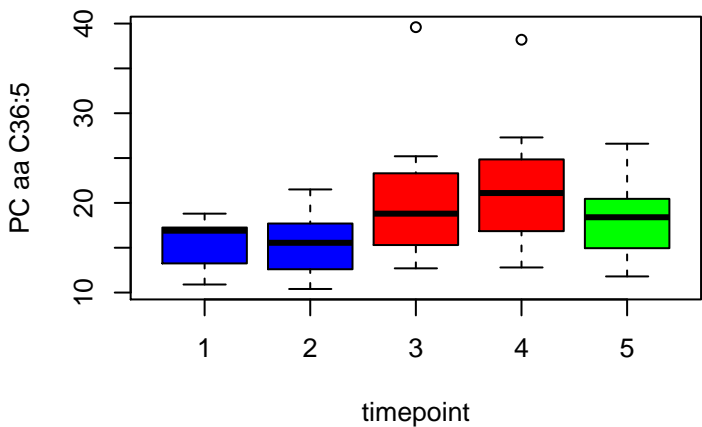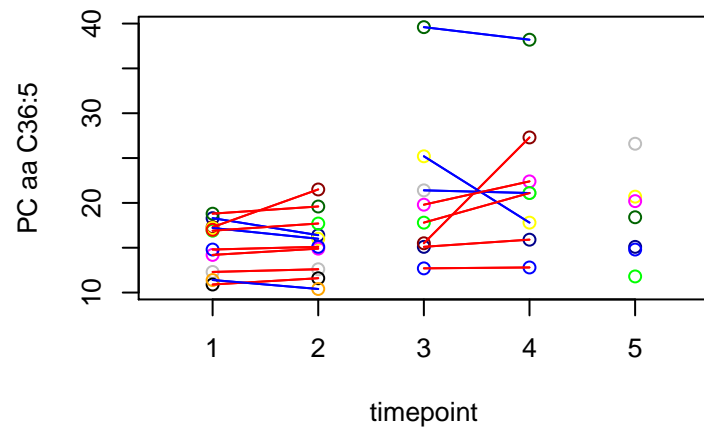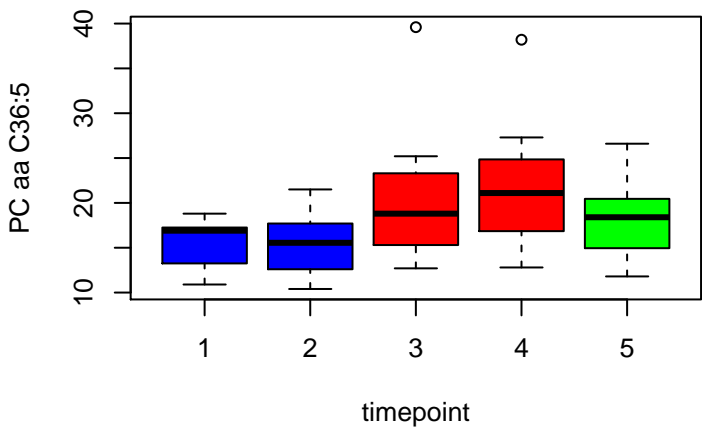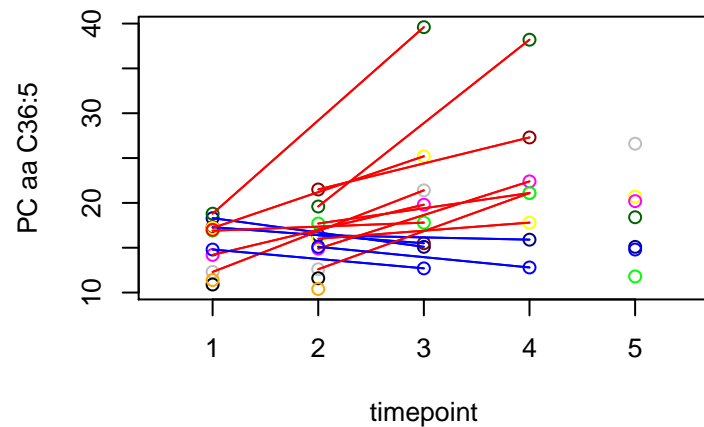

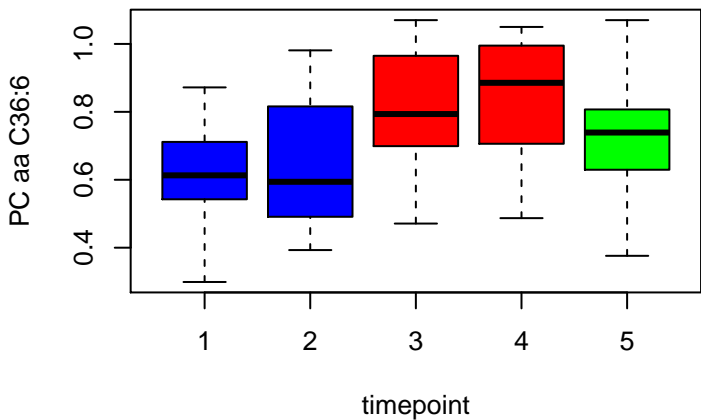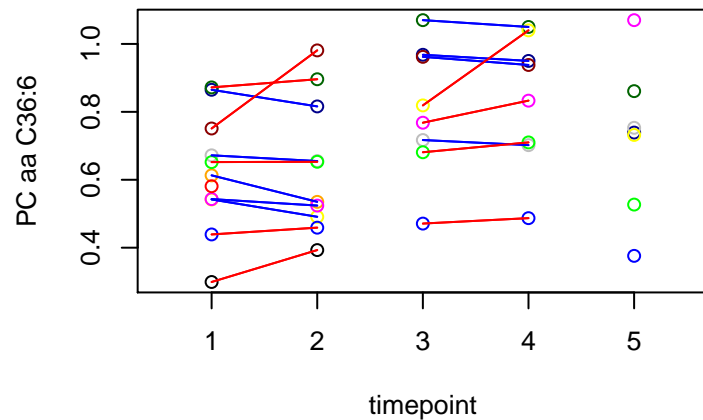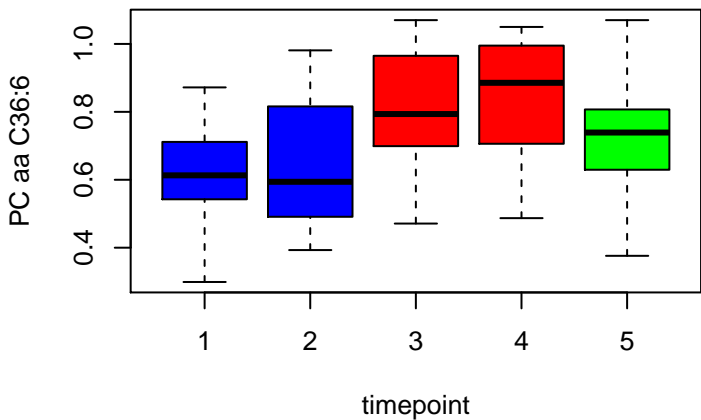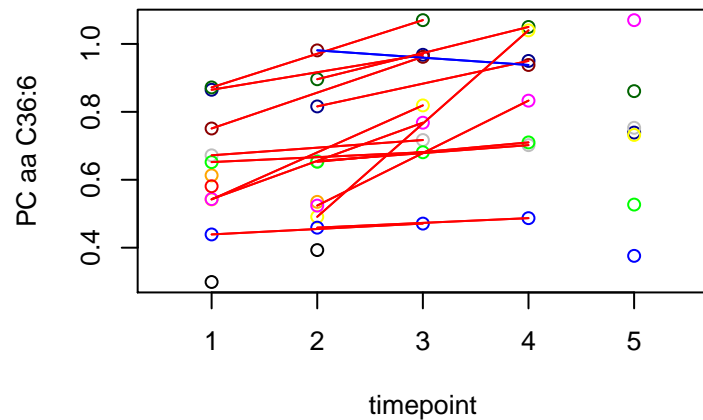

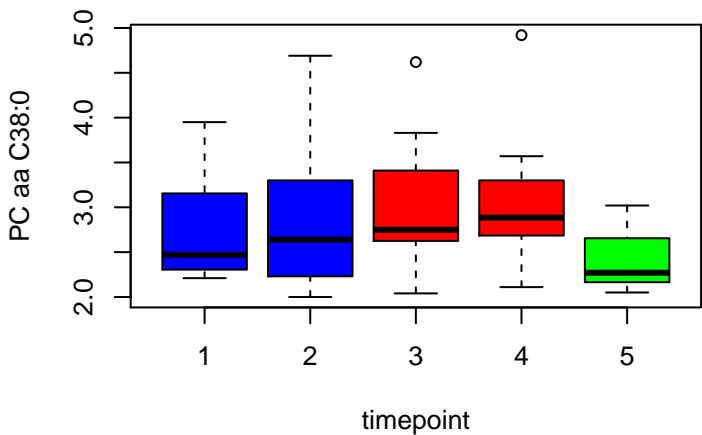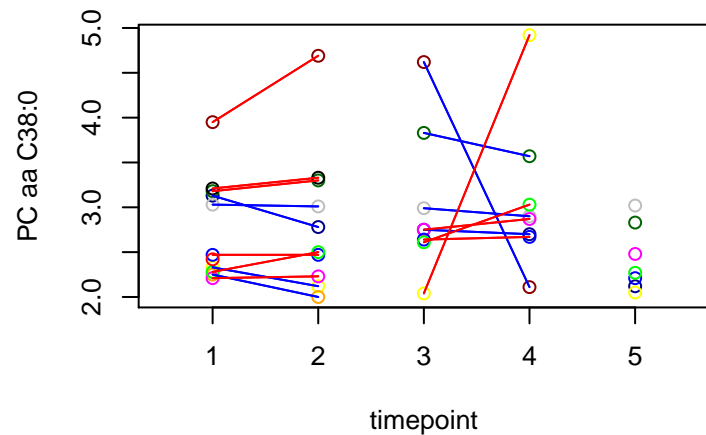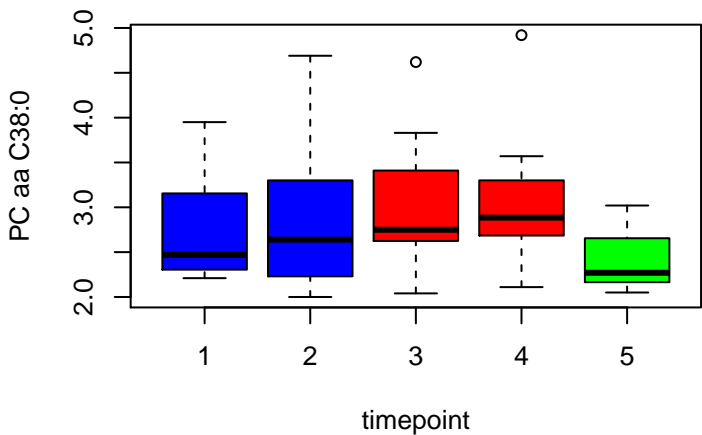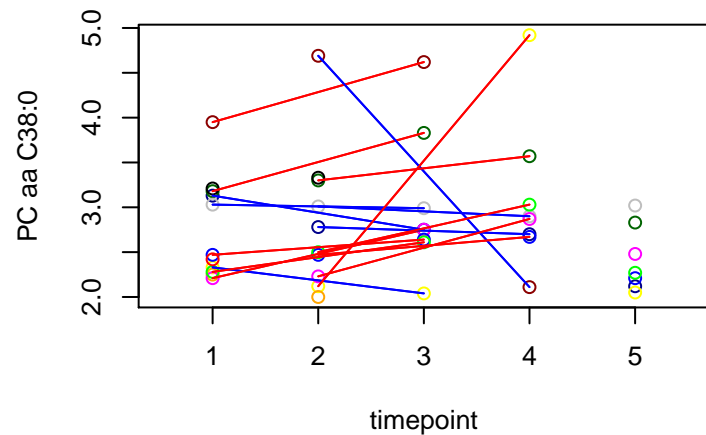



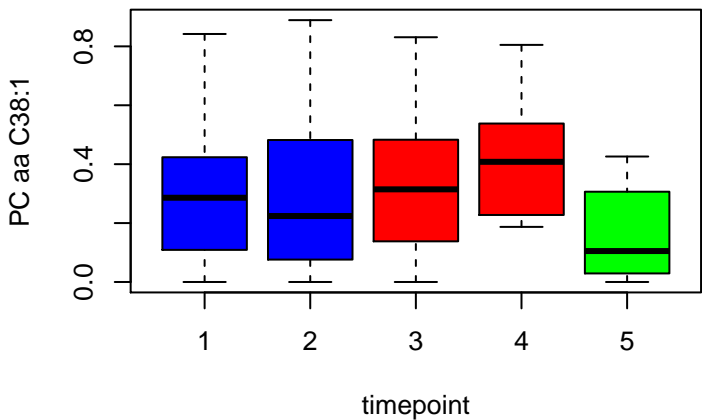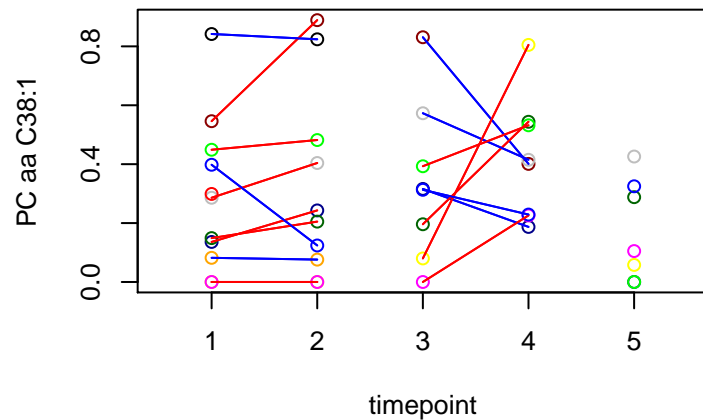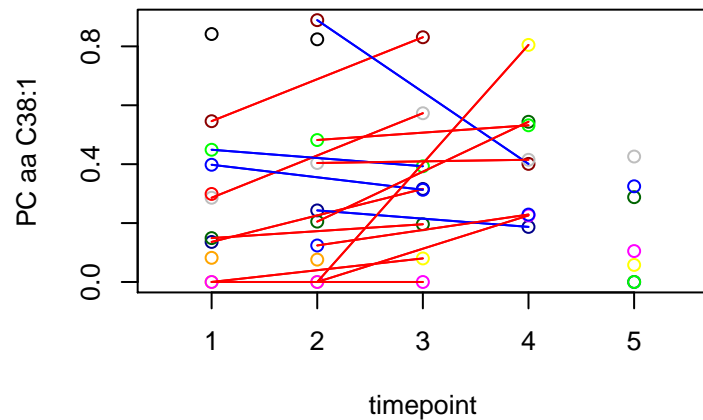

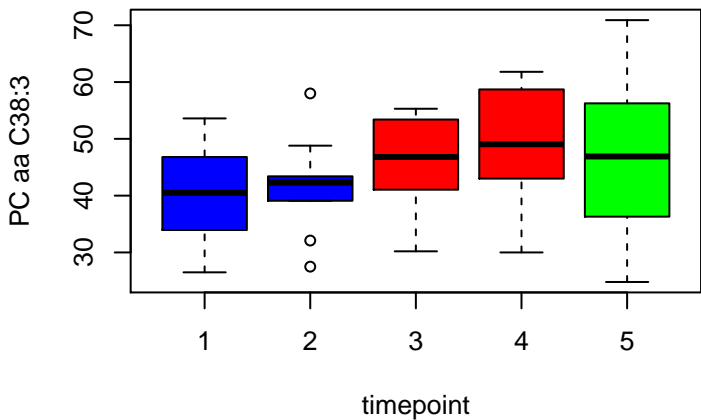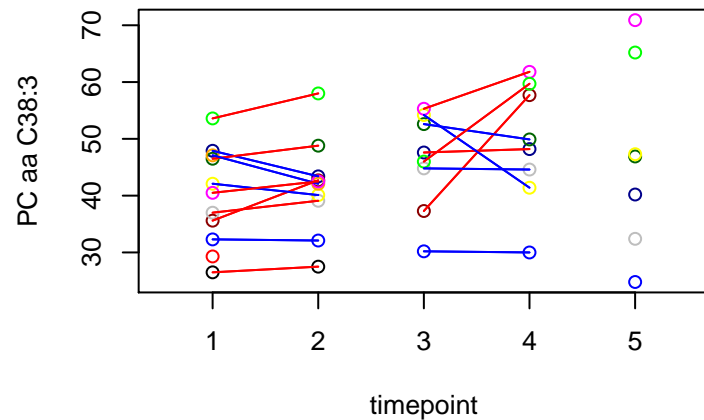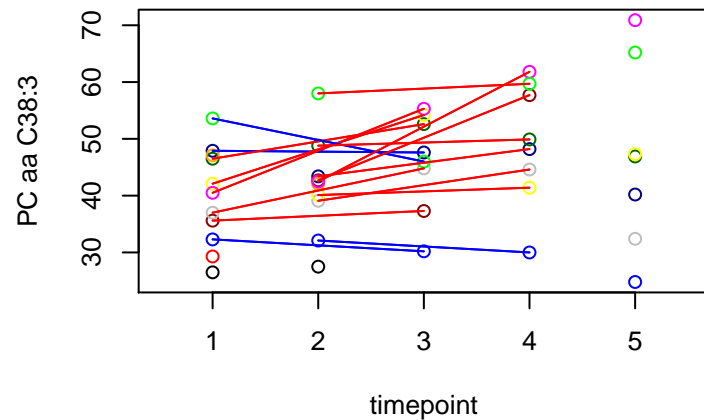

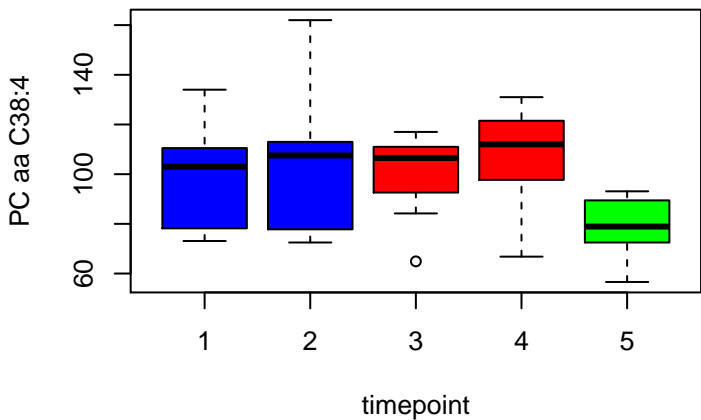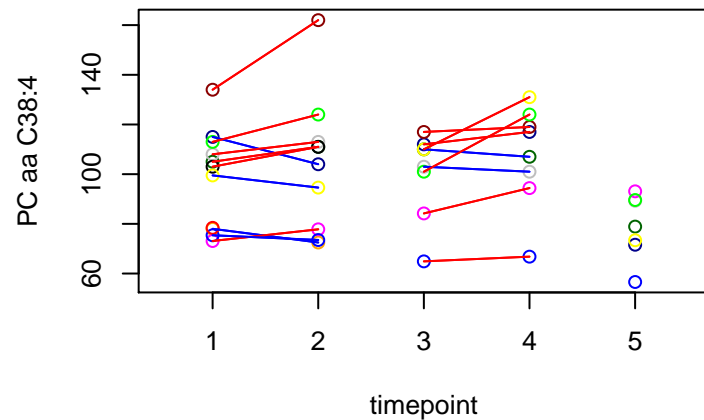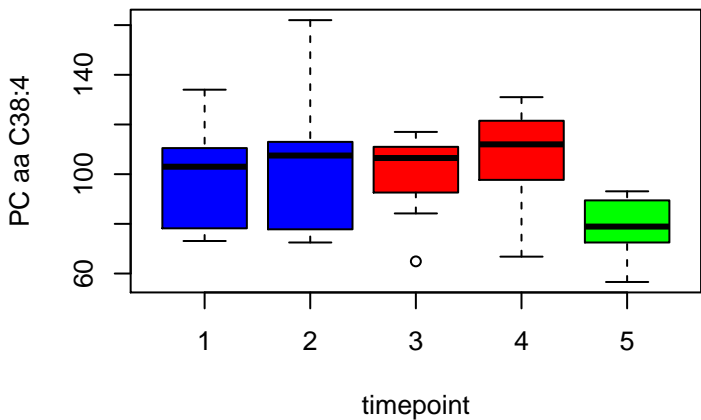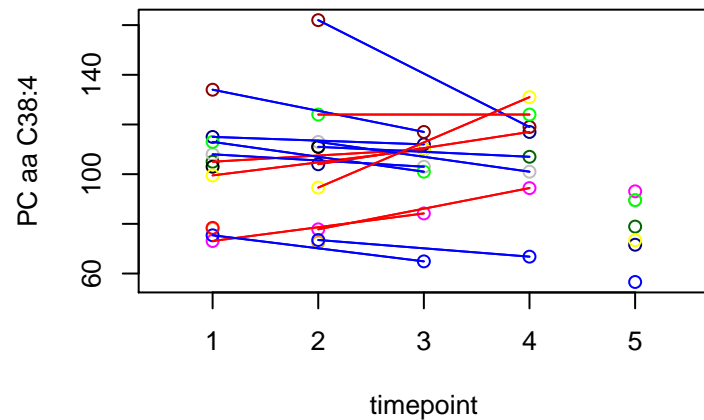

PC aa C38:5

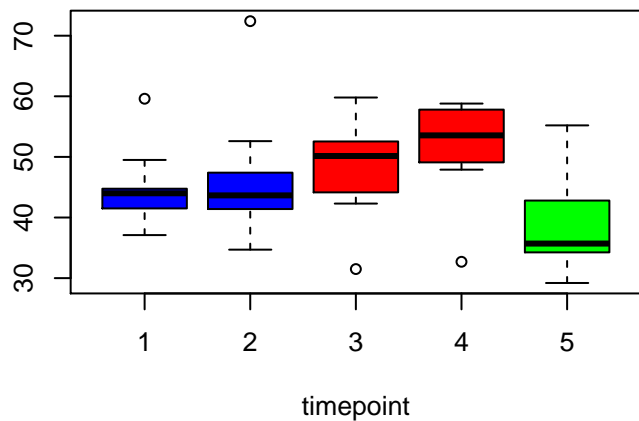

PC aa C38:5

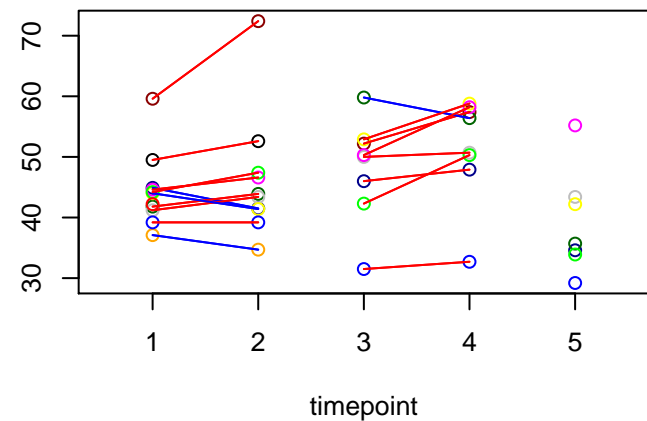

PC aa C38:5

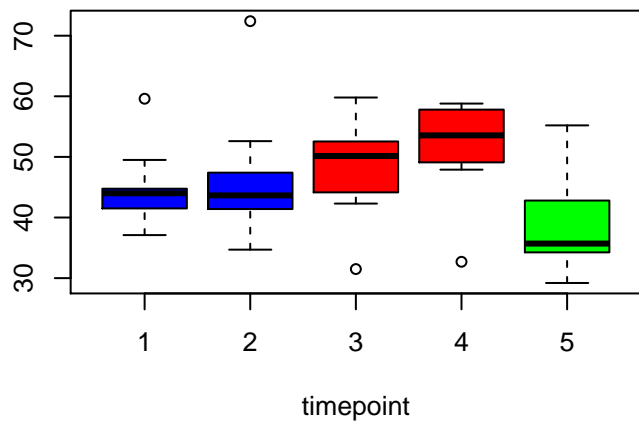

PC aa C38:5

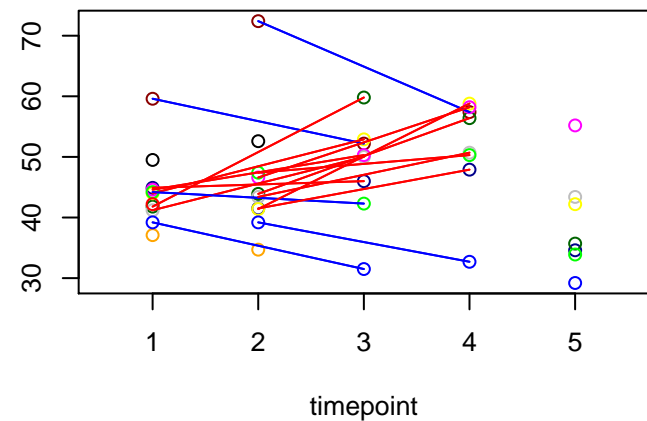

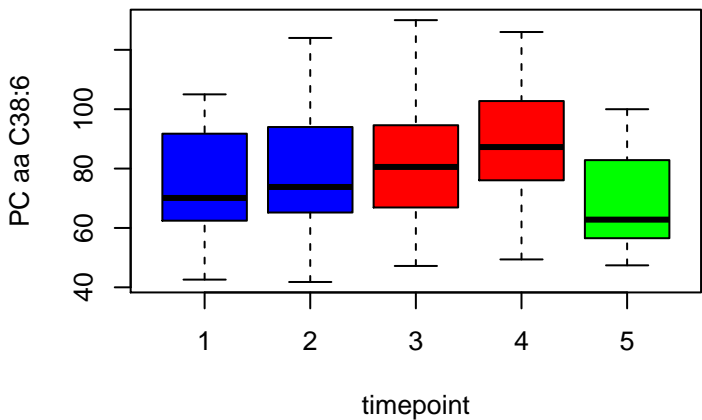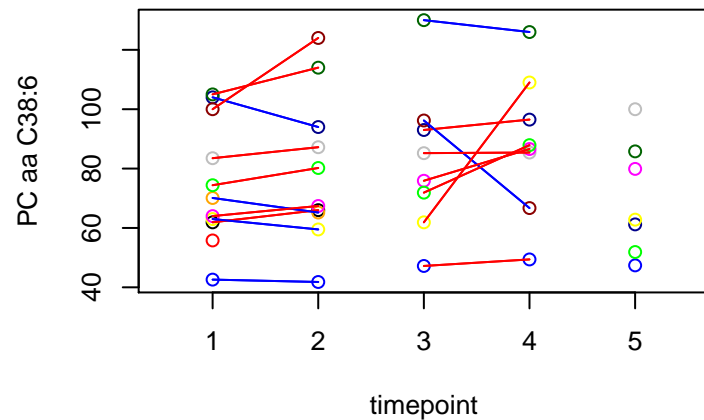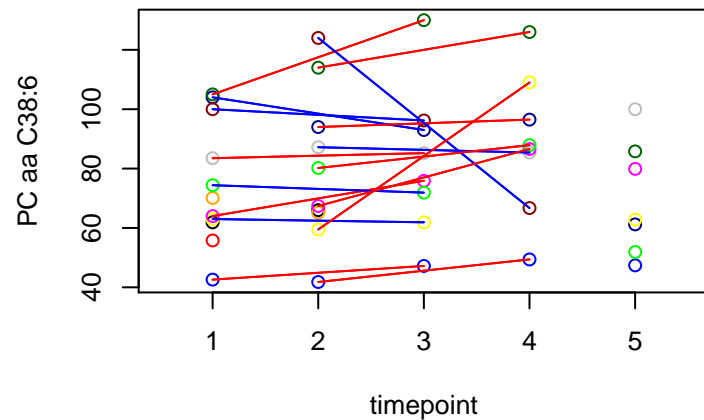



PC aa C40:2

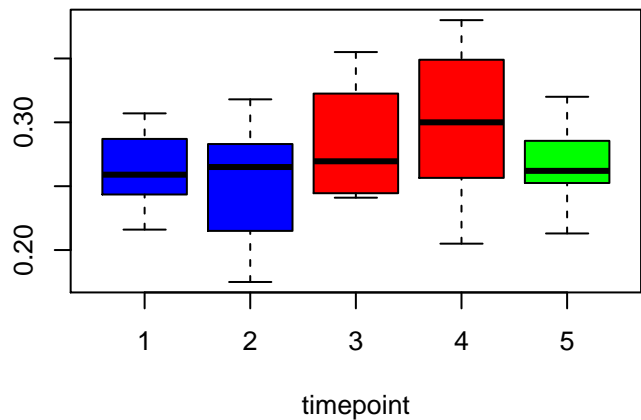

PC aa C40:2

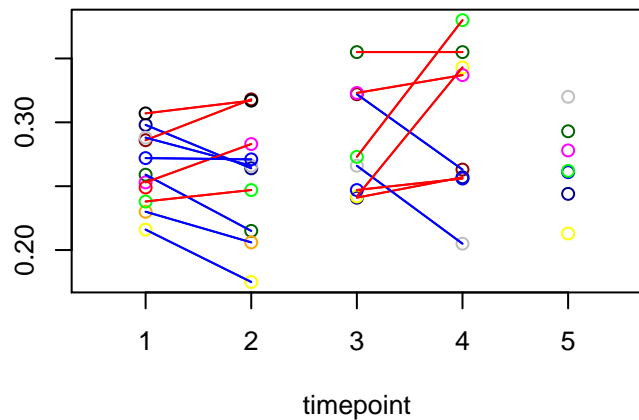

PC aa C40:2



PC aa C40:2

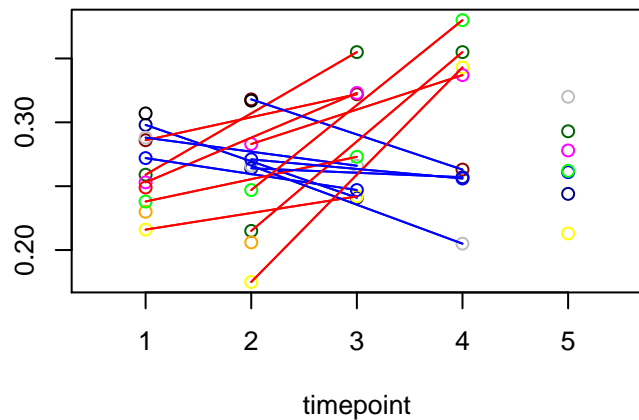

PC aa C40:3

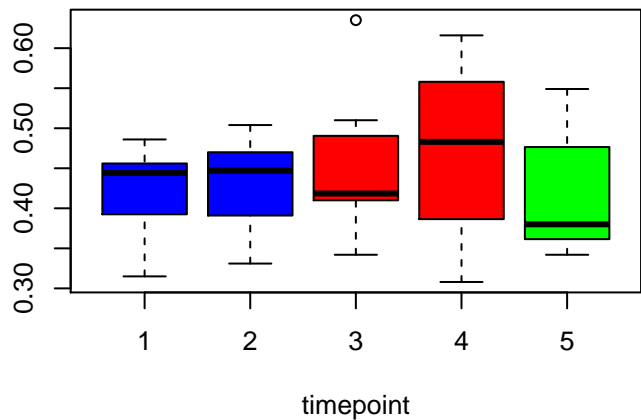

PC aa C40:3

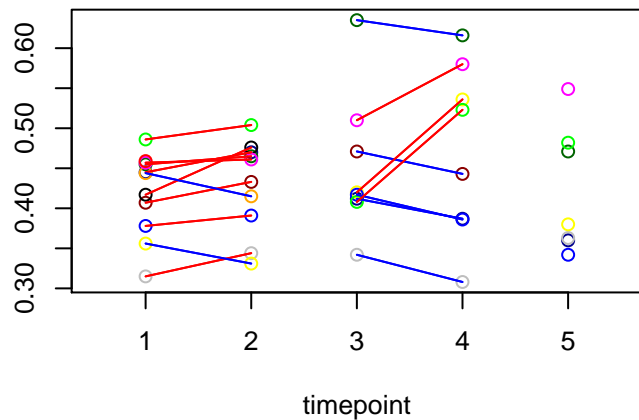

PC aa C40:3

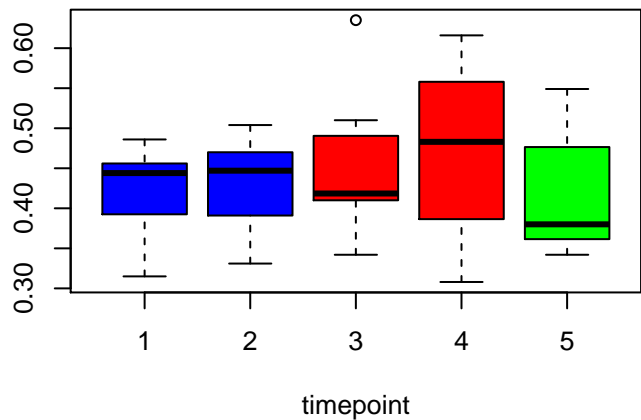

PC aa C40:3

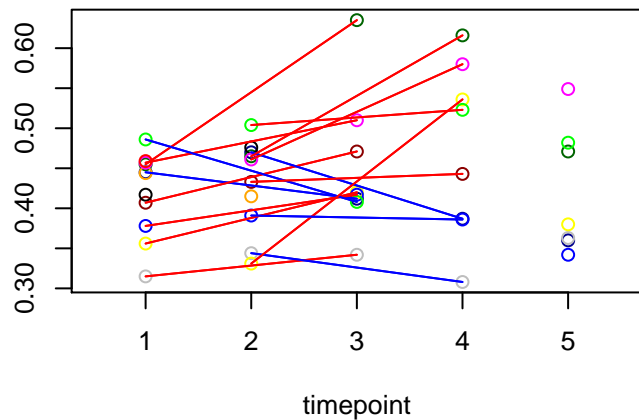



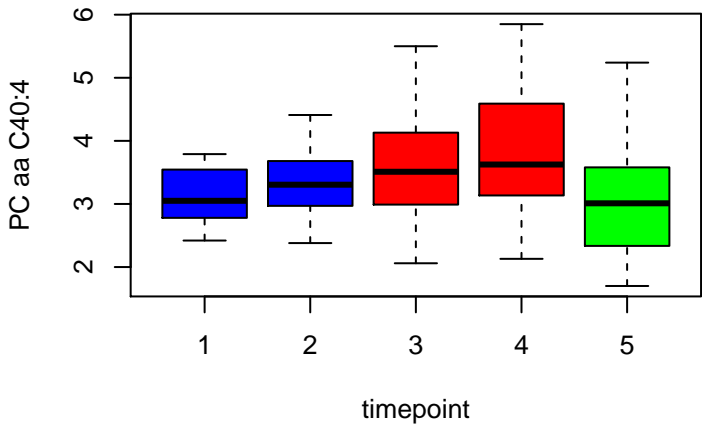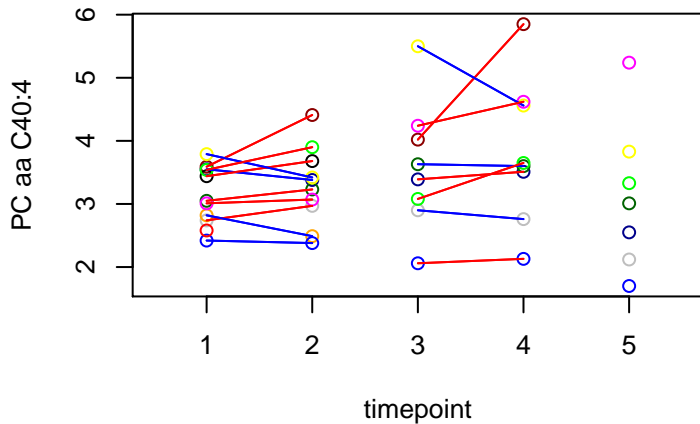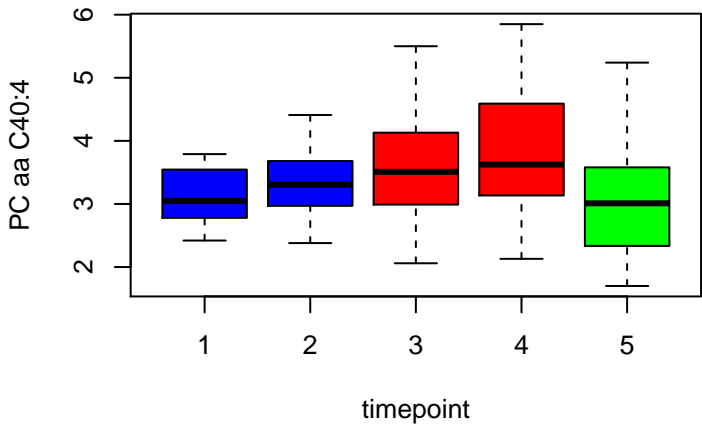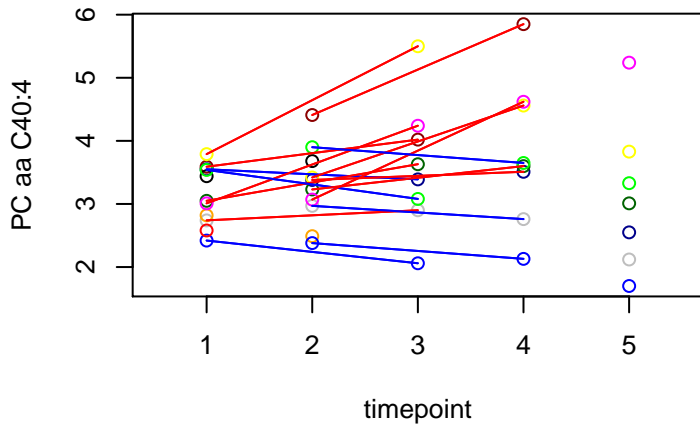

PC aa C40:5

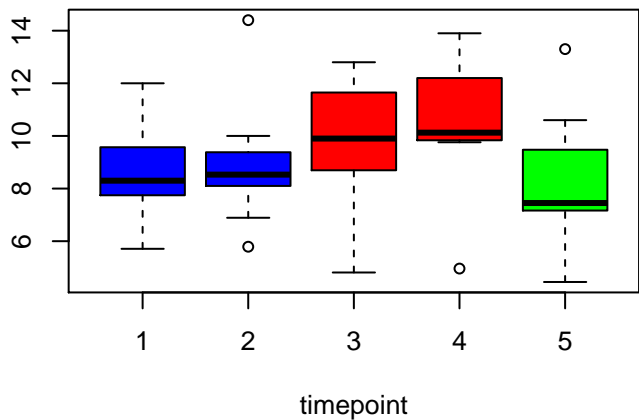

PC aa C40:5

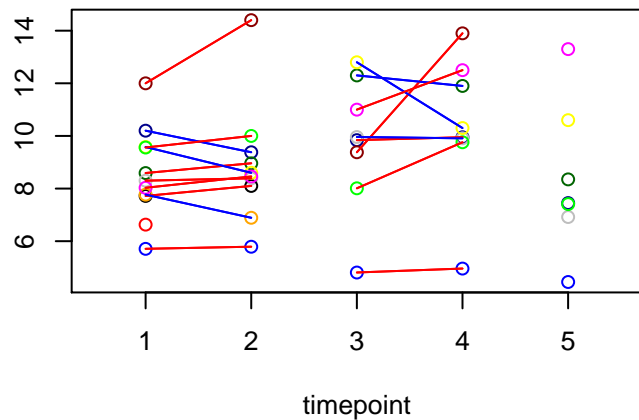

PC aa C40:5

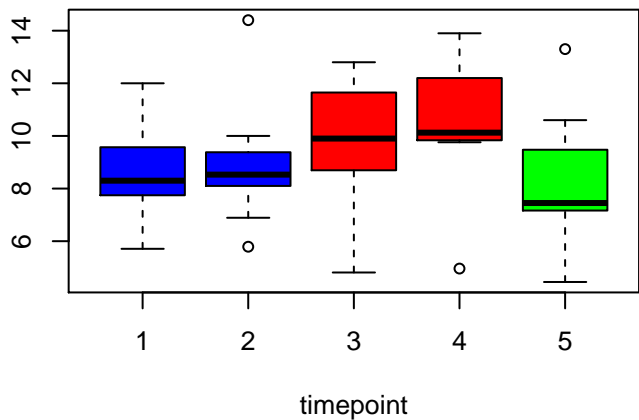

PC aa C40:5

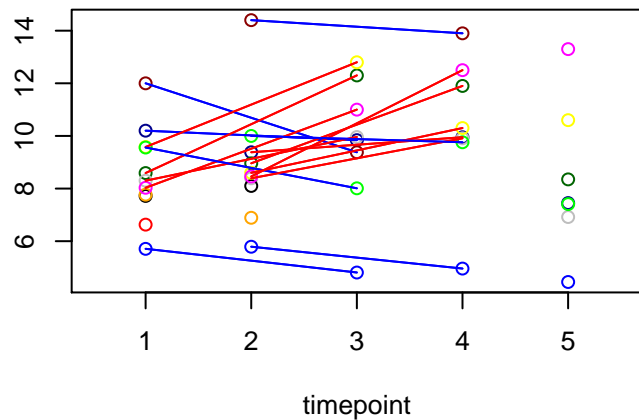

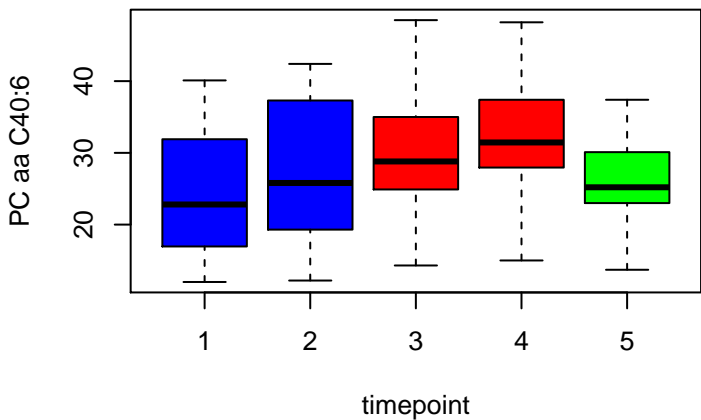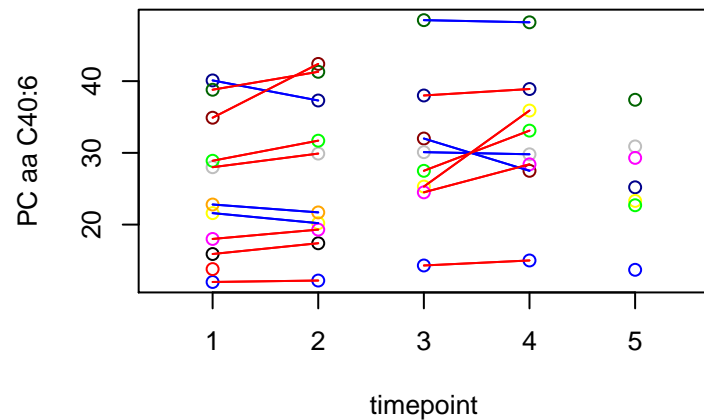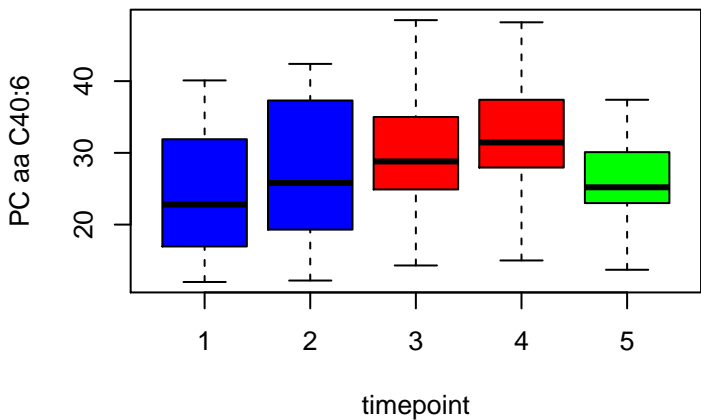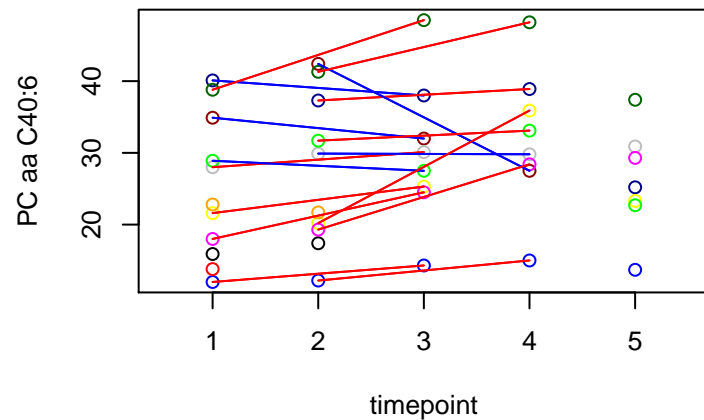

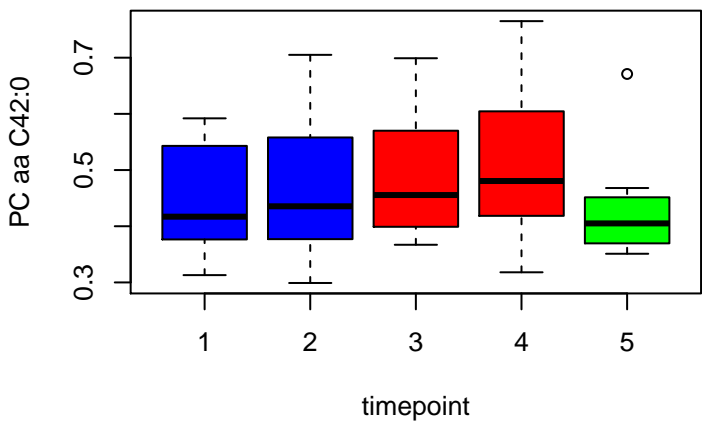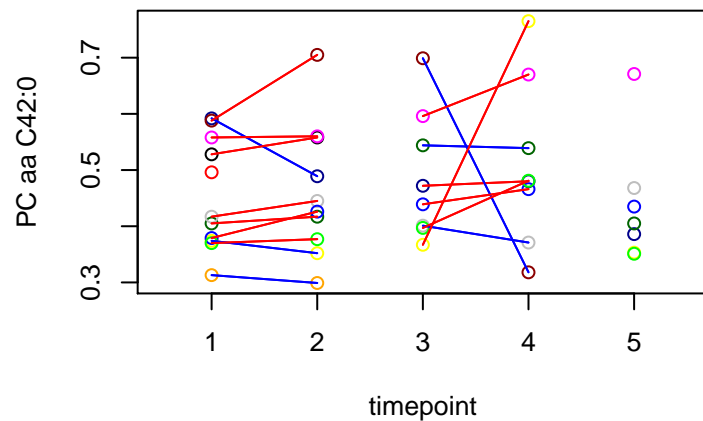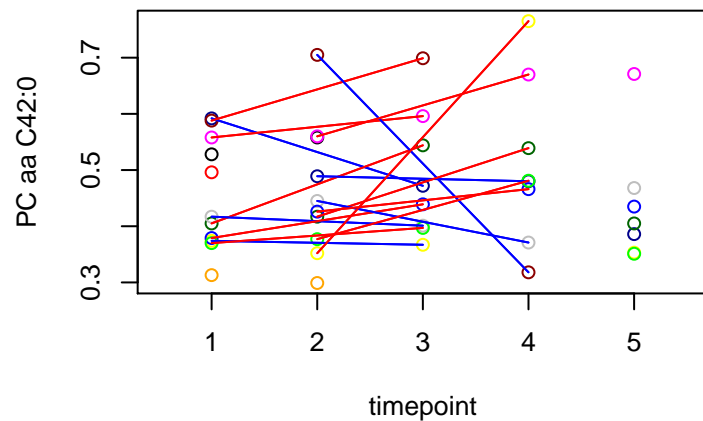

PC aa C42:1

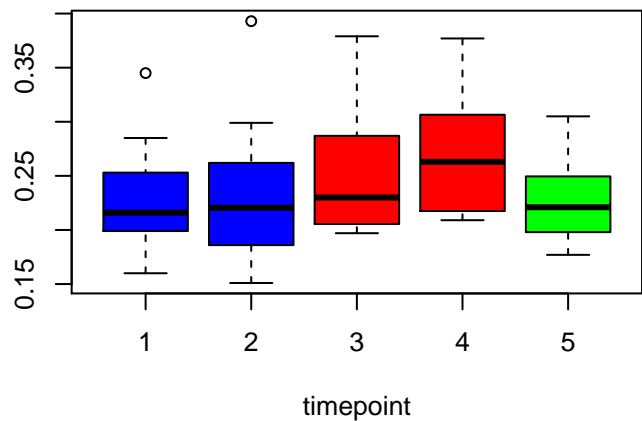

PC aa C42:1

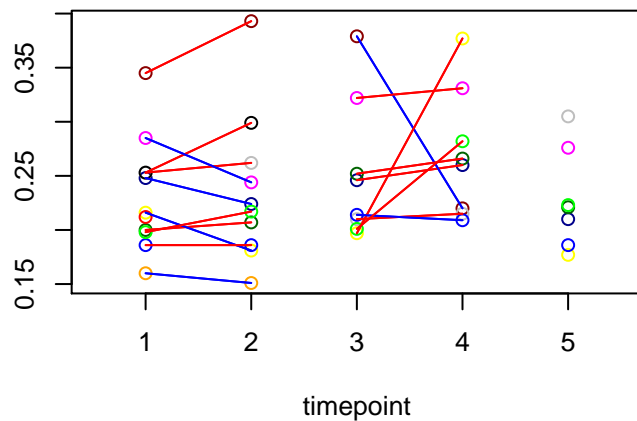

PC aa C42:1

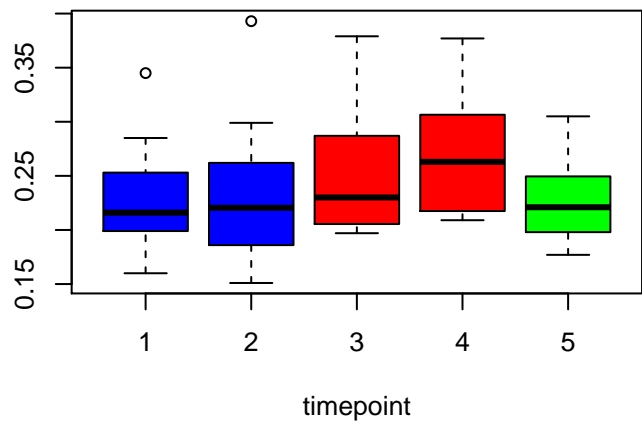

PC aa C42:1

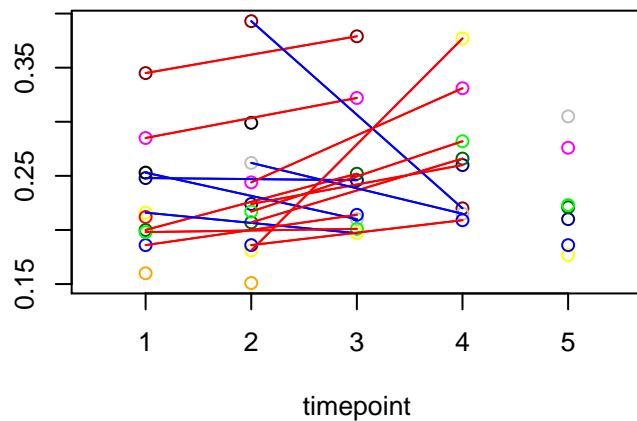

PC aa C42:2

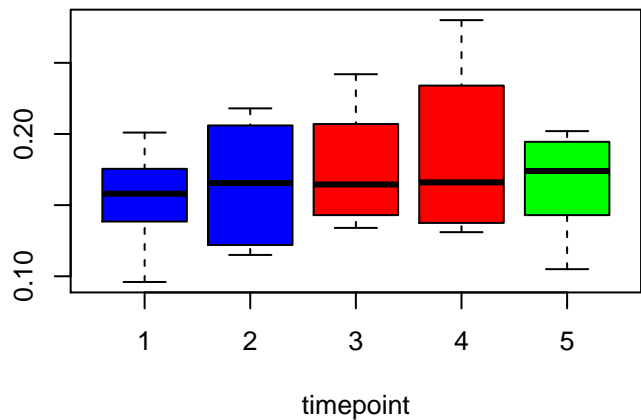

PC aa C42:2

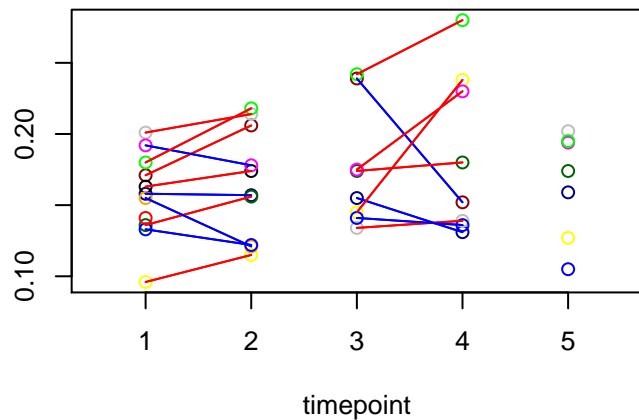

PC aa C42:2

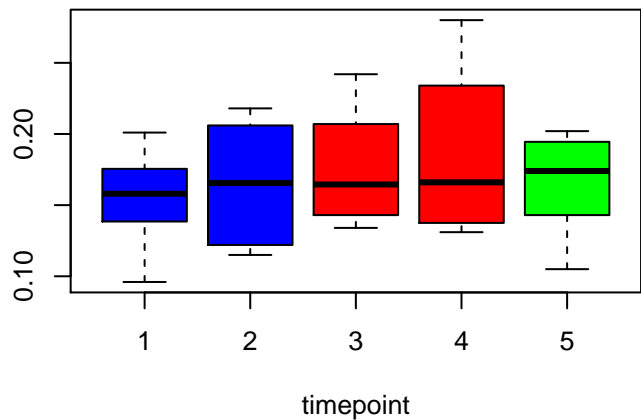

PC aa C42:2

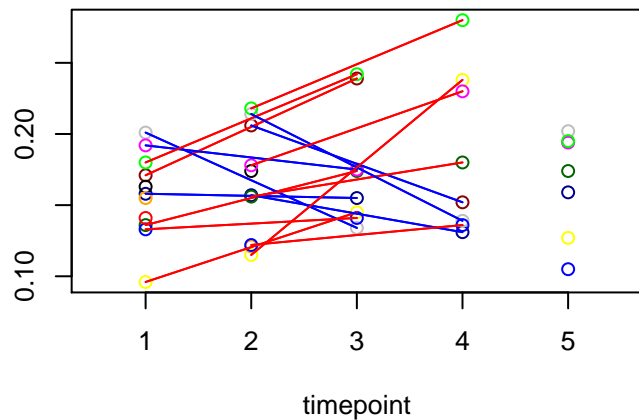

PC aa C42:4

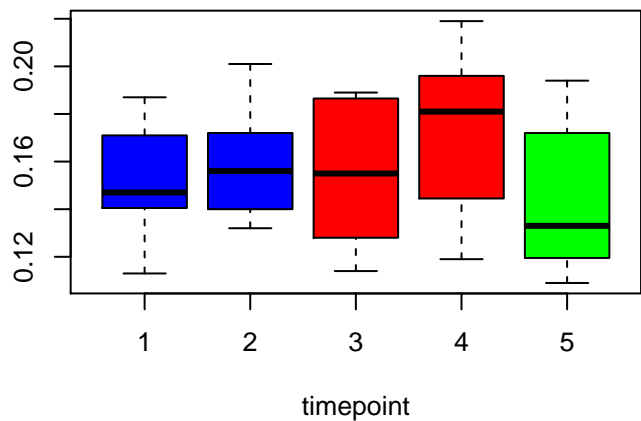

PC aa C42:4

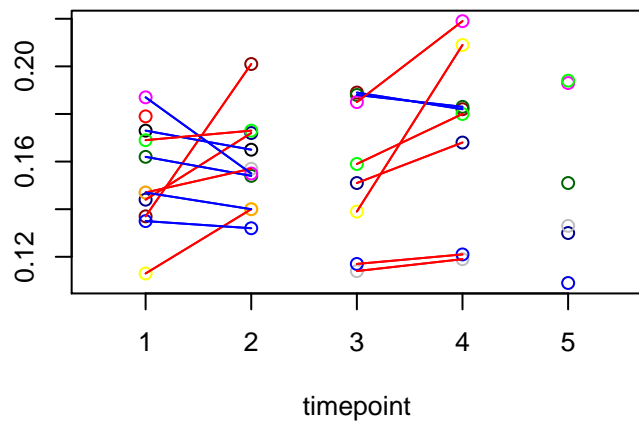

PC aa C42:4

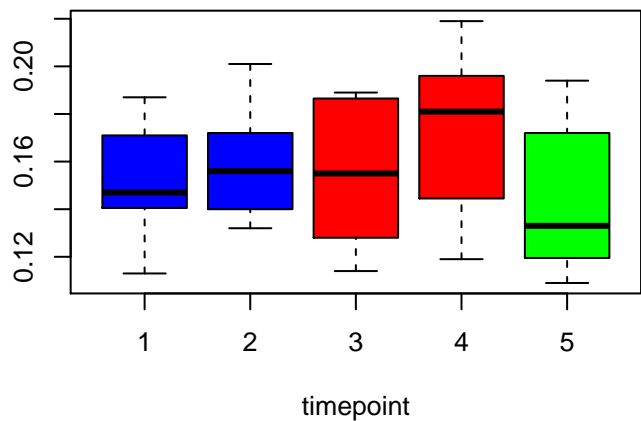

PC aa C42:4

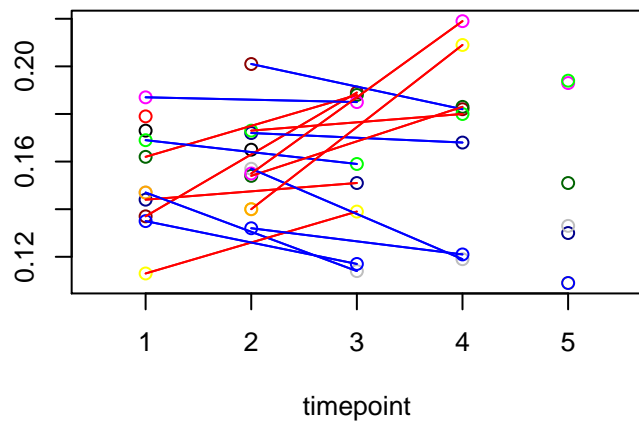

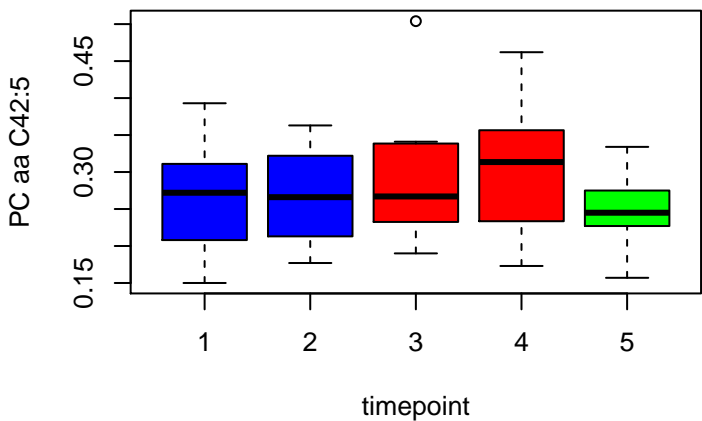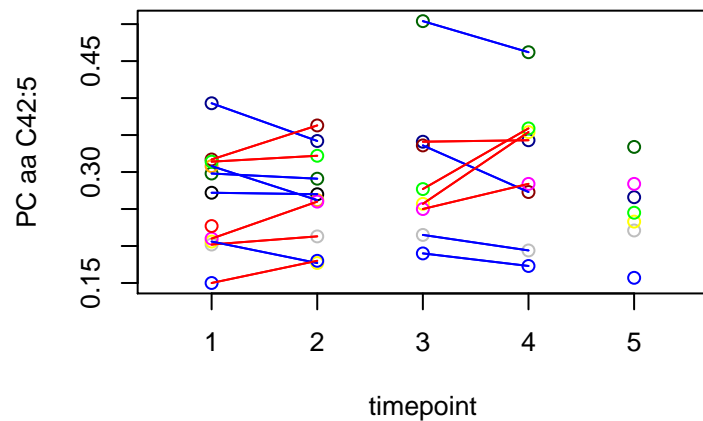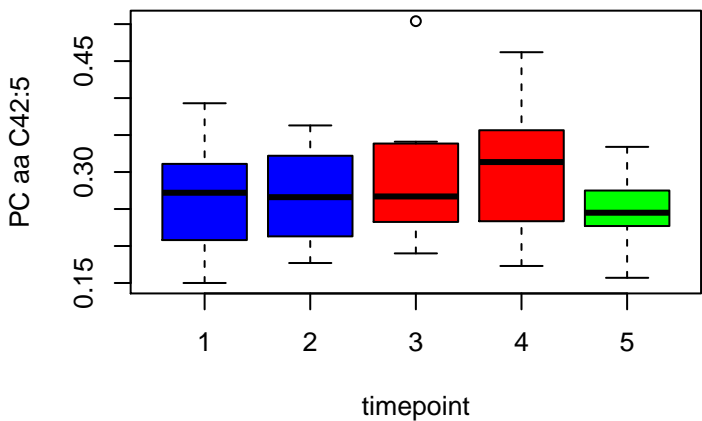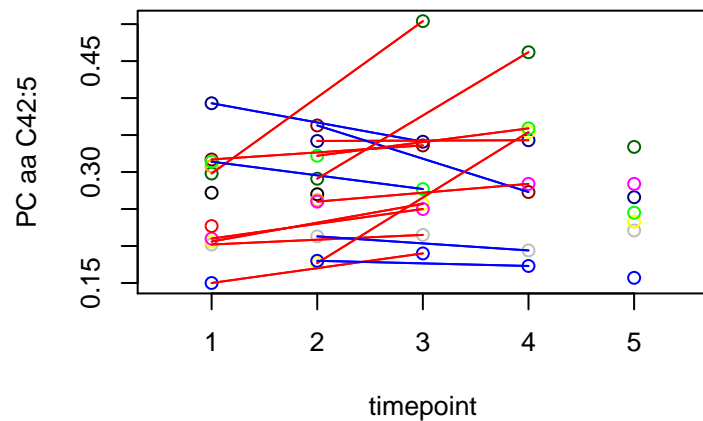



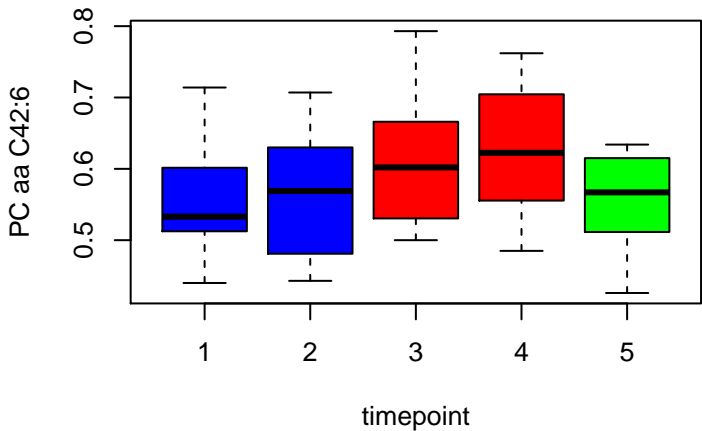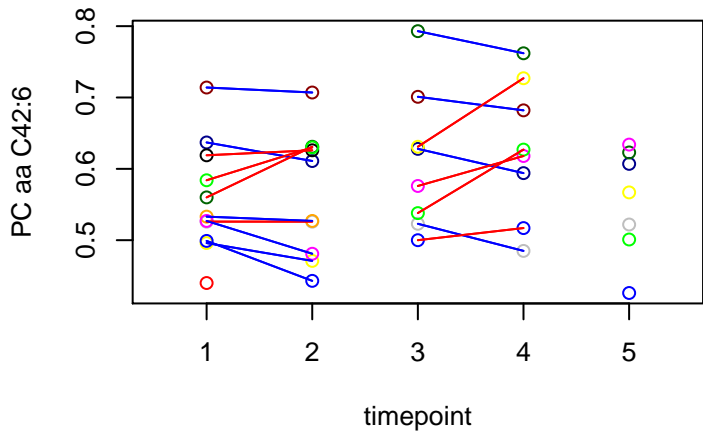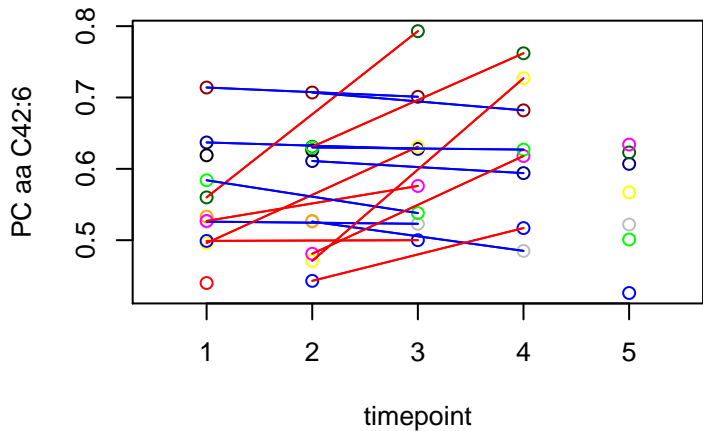

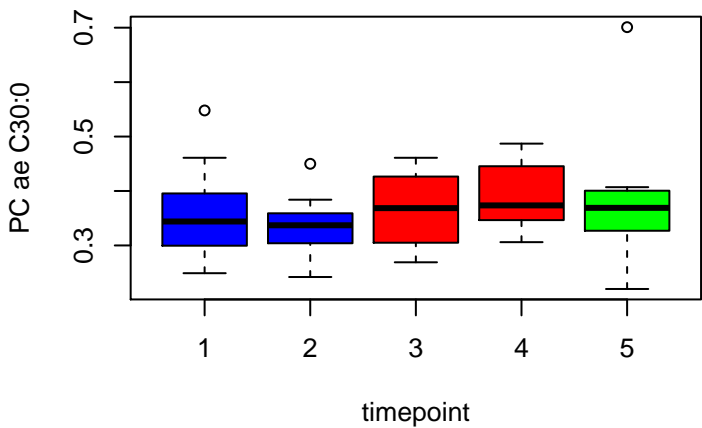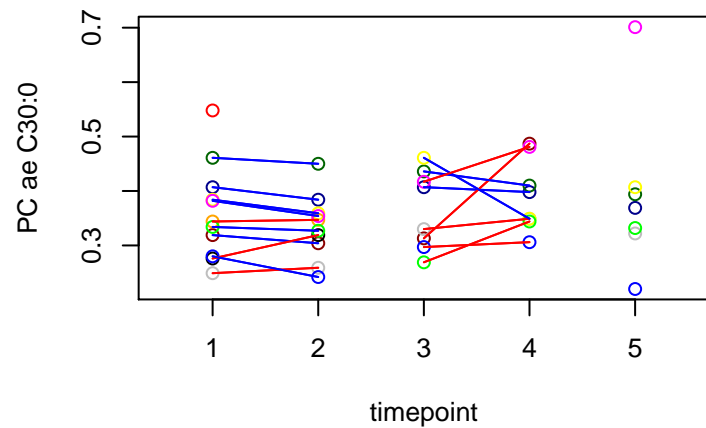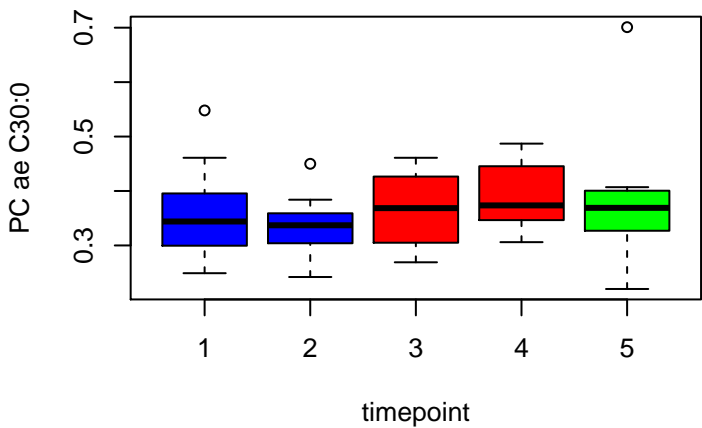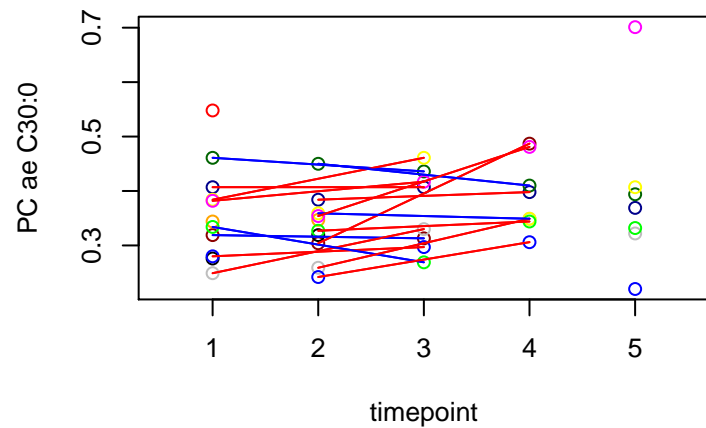

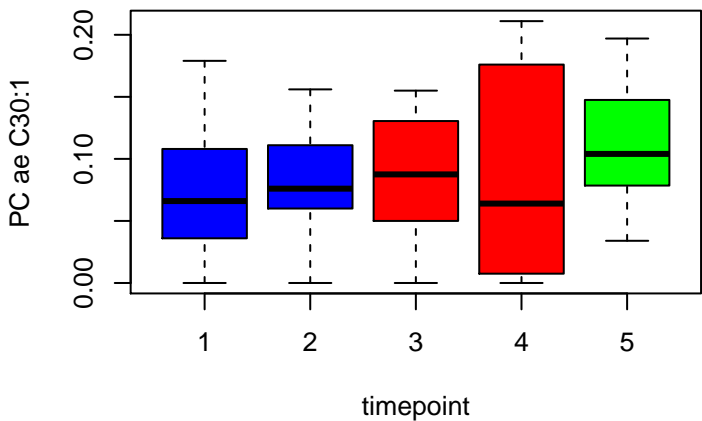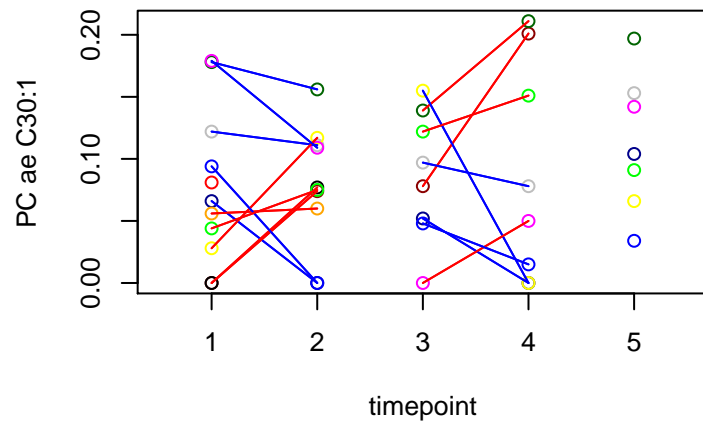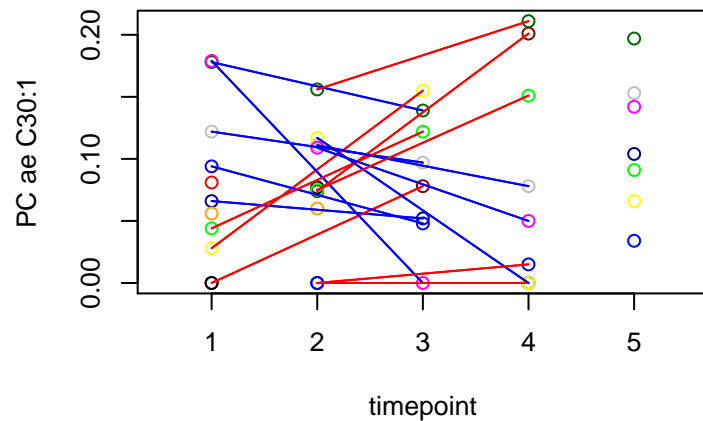

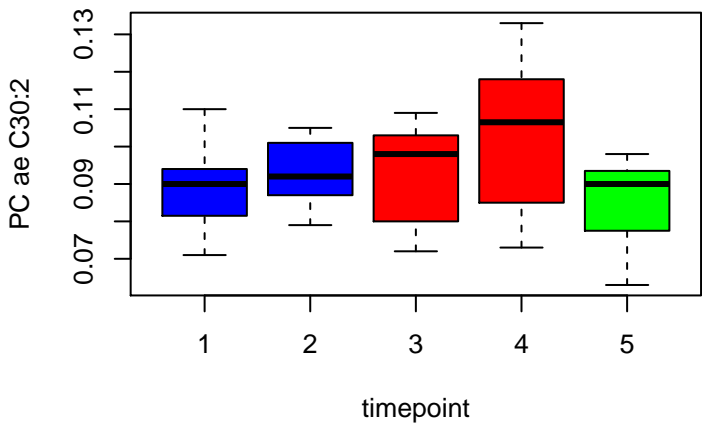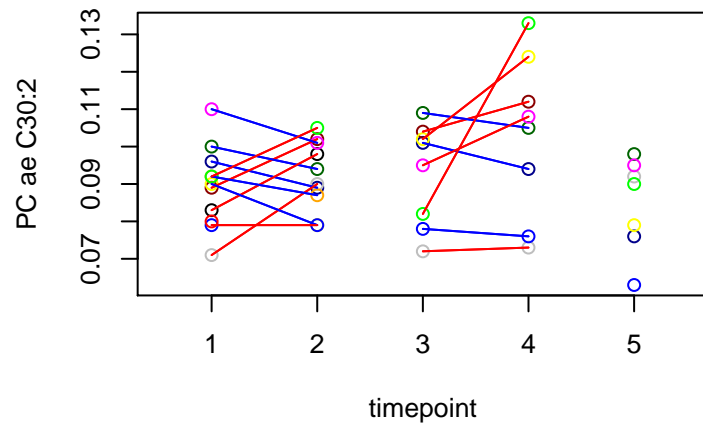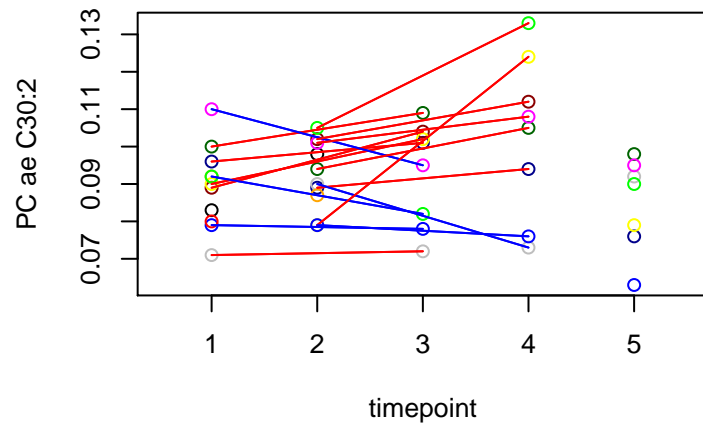

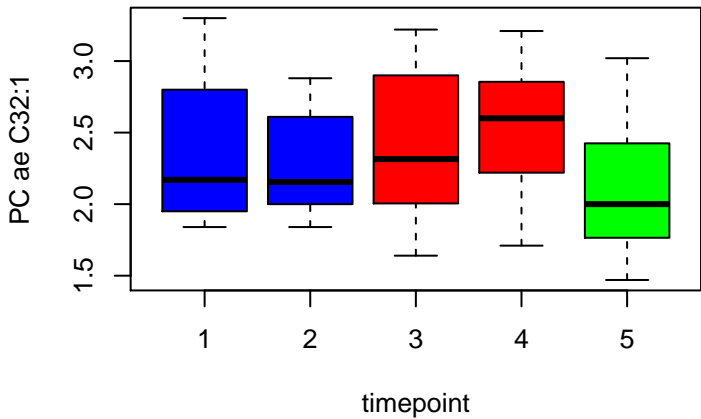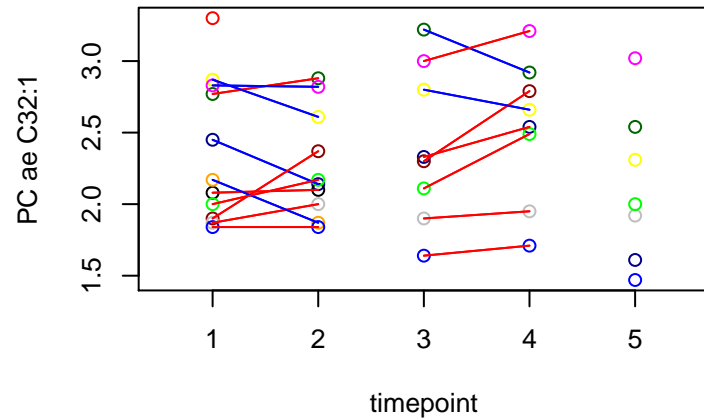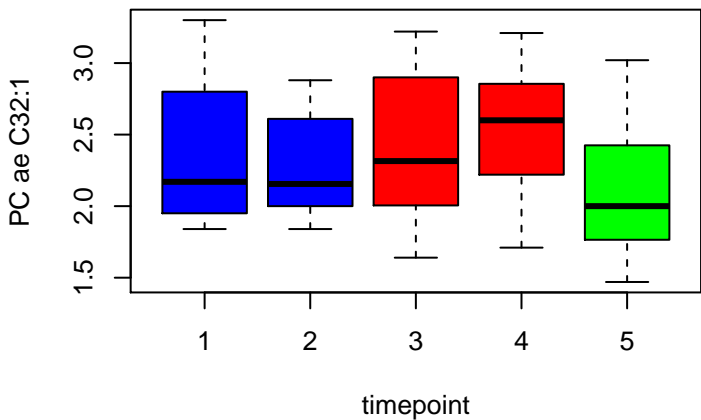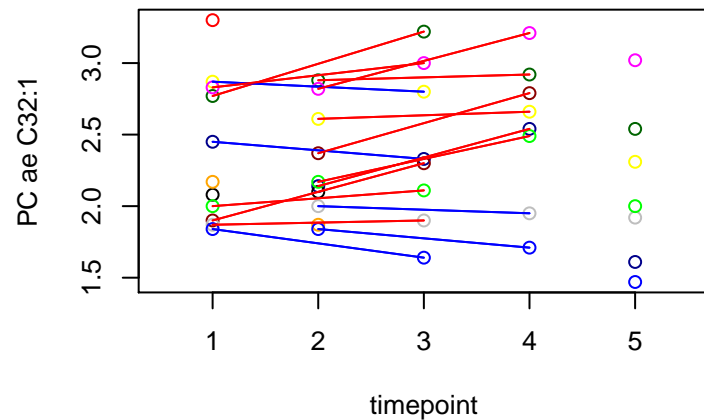

PC ae C32:2

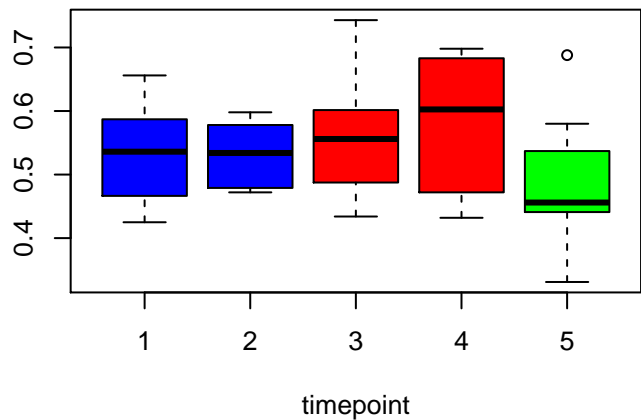

PC ae C32:2

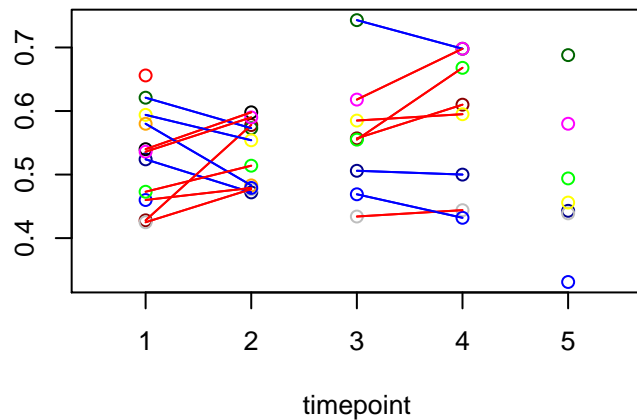

PC ae C32:2

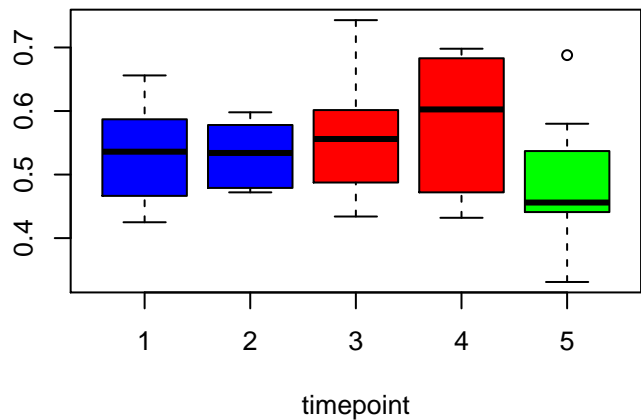

PC ae C32:2

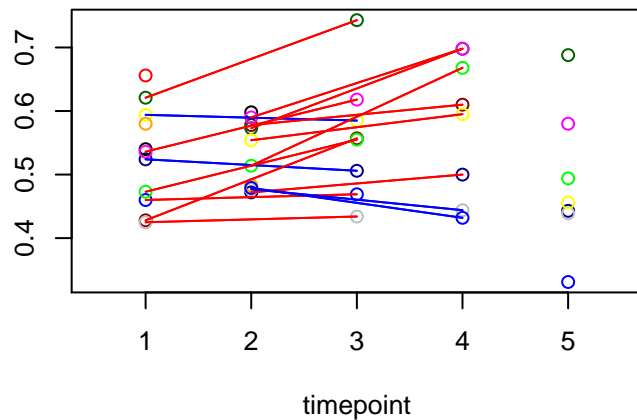

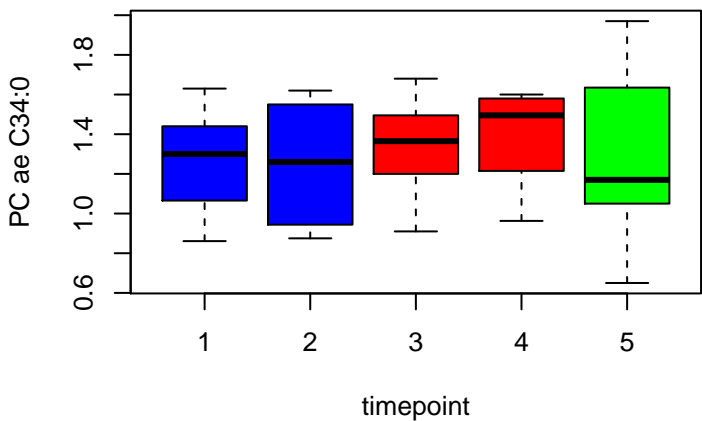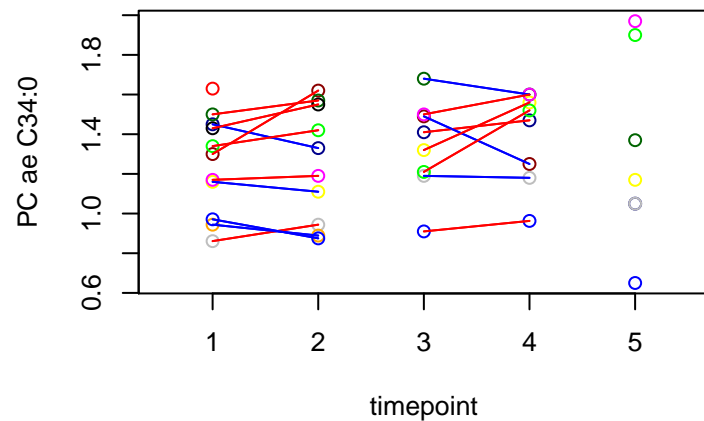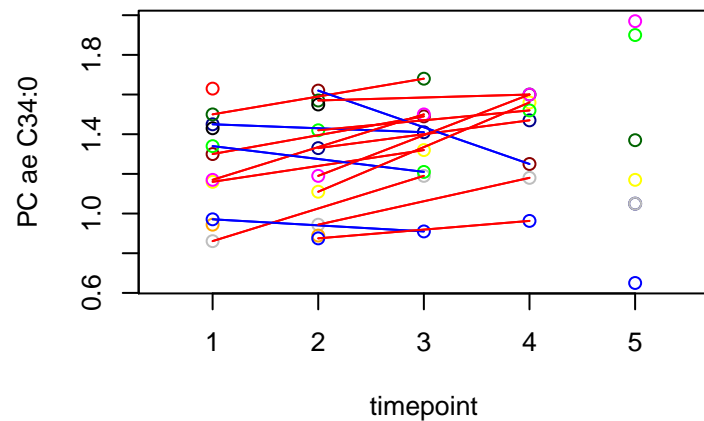

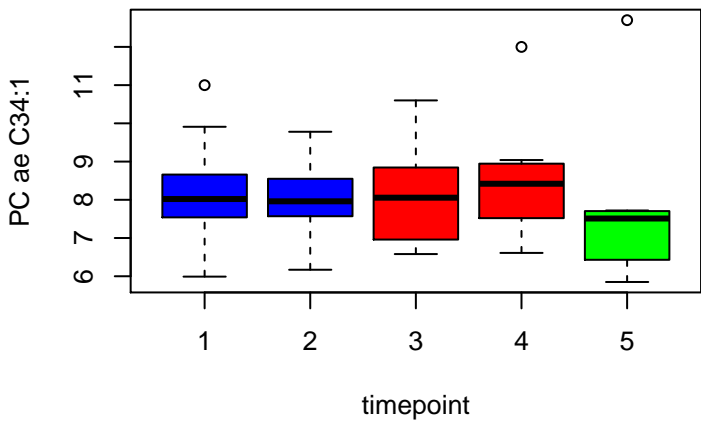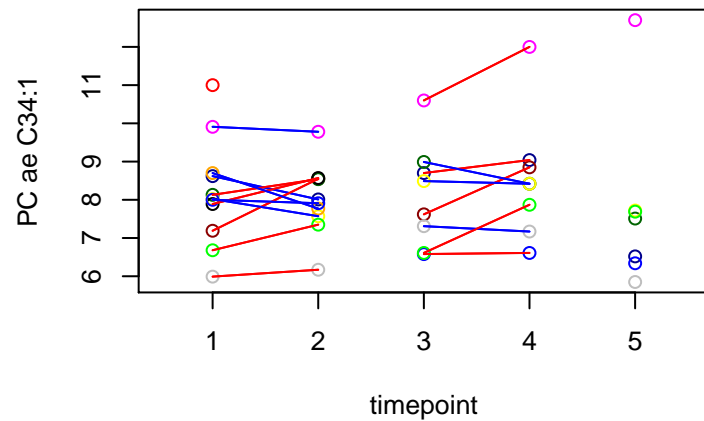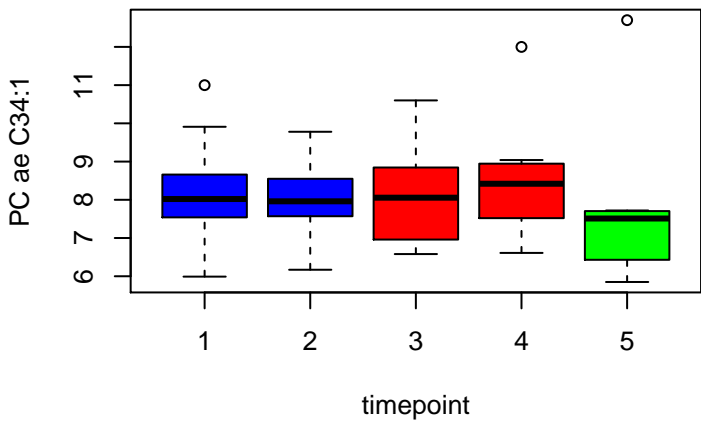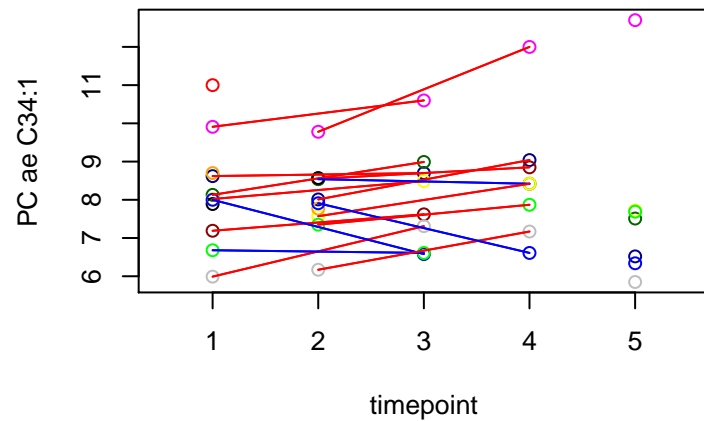



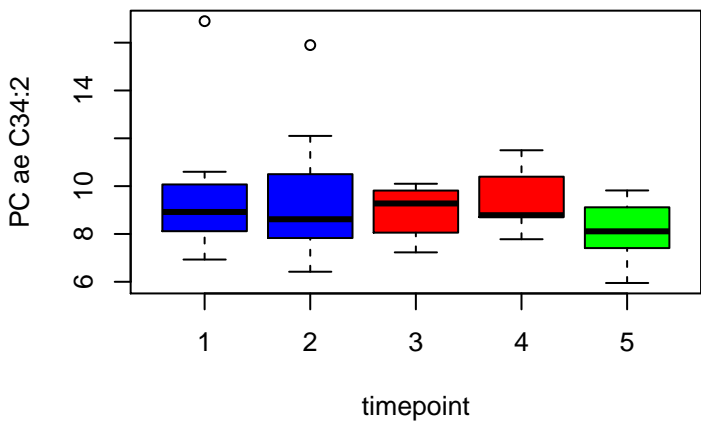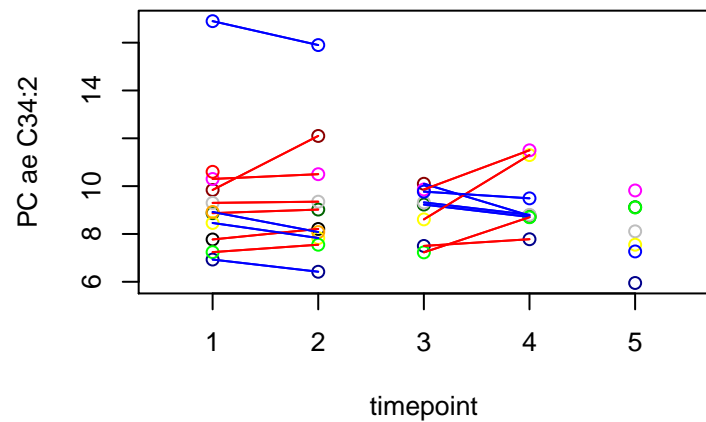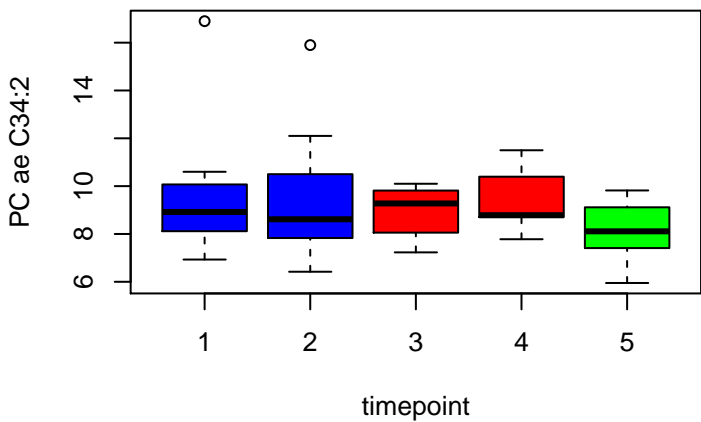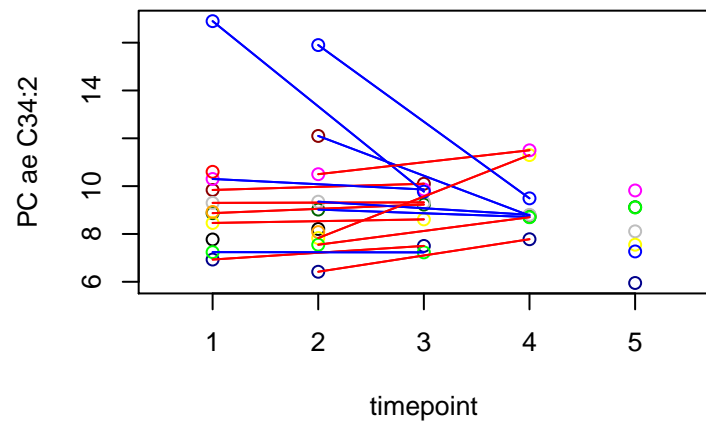

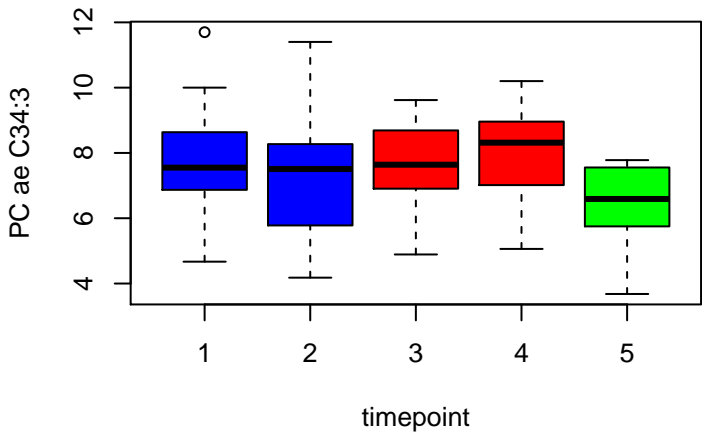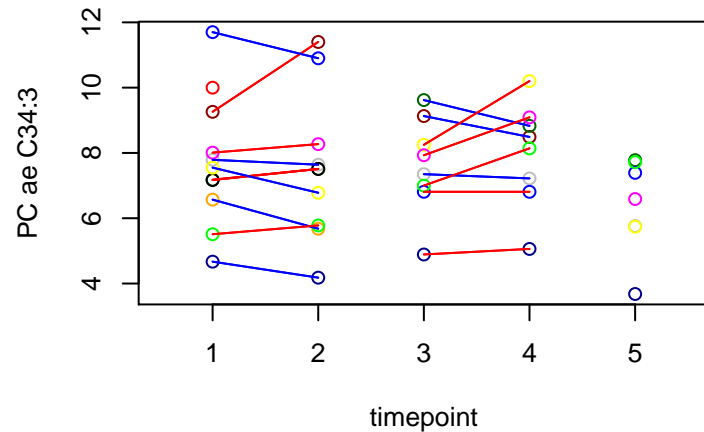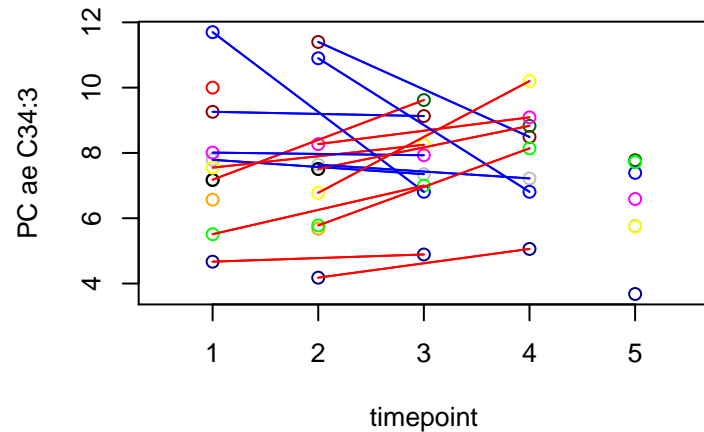

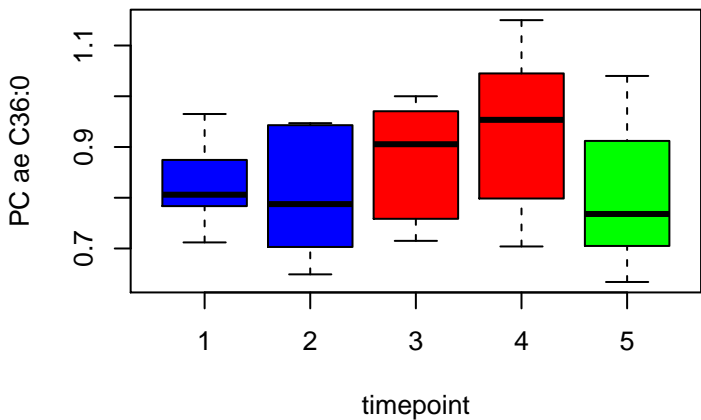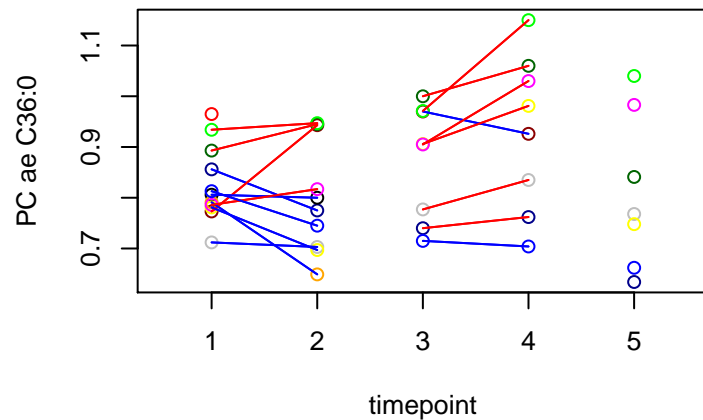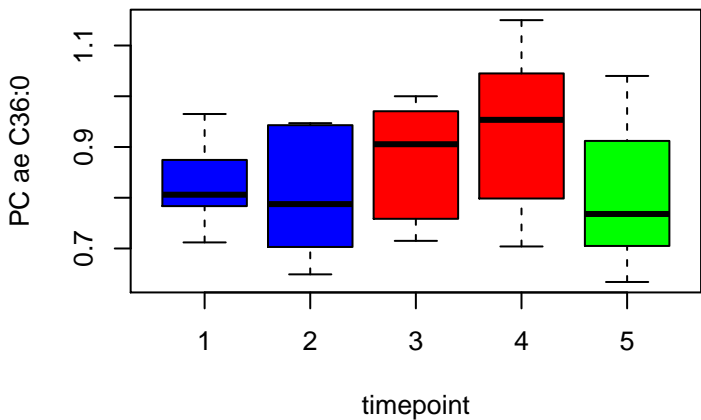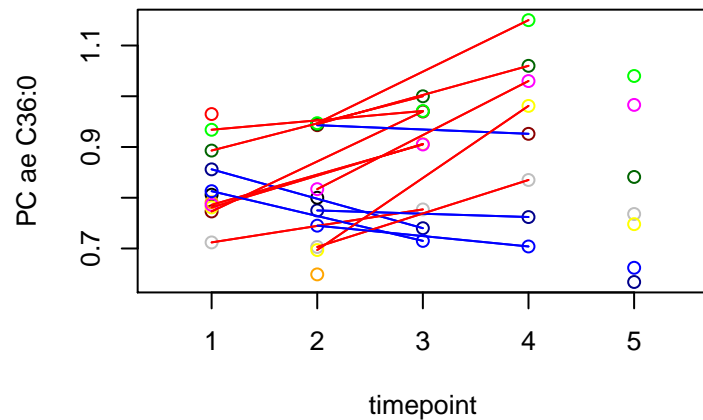

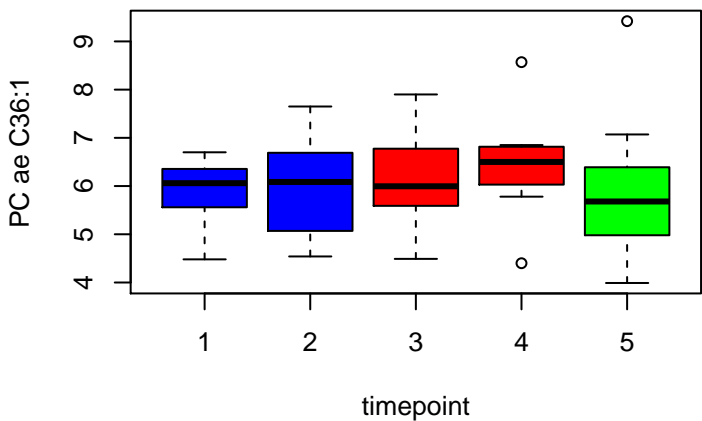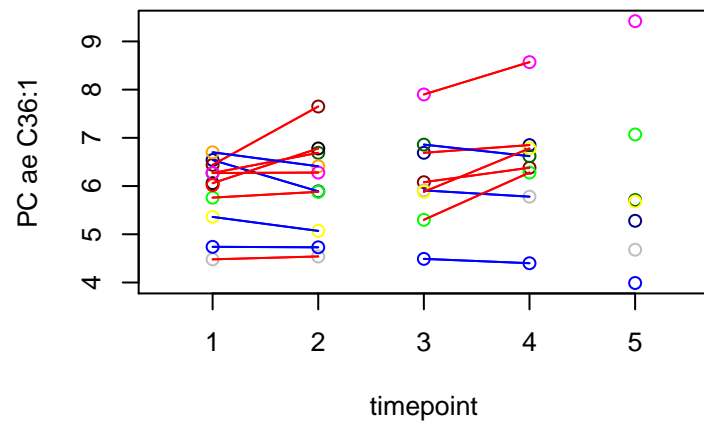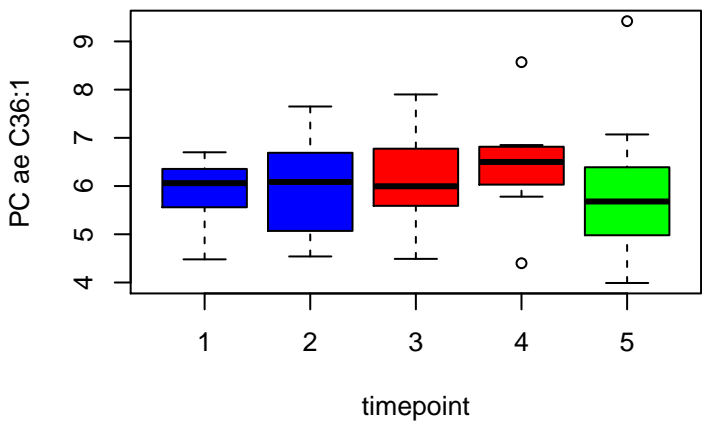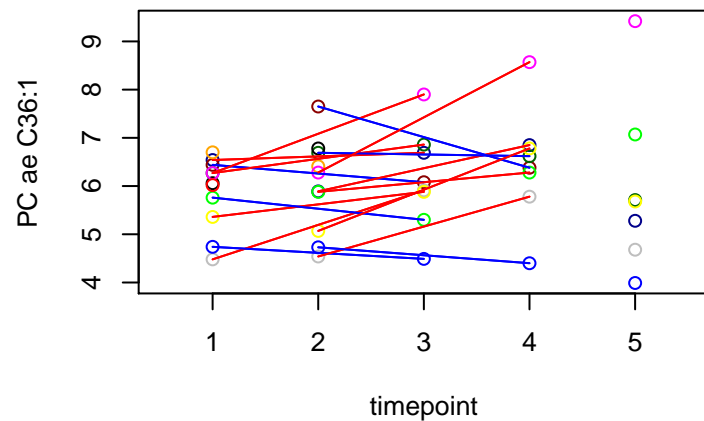

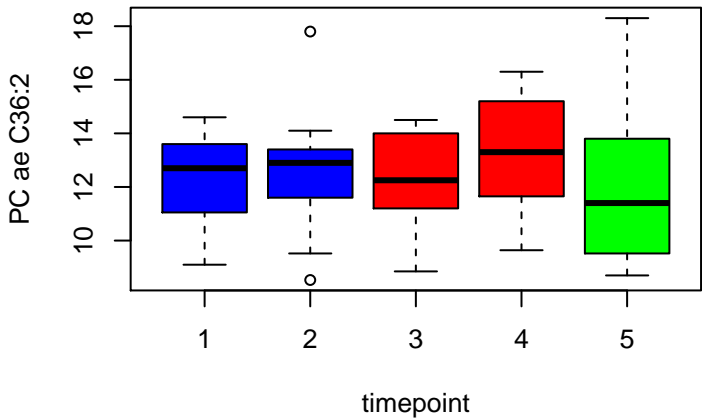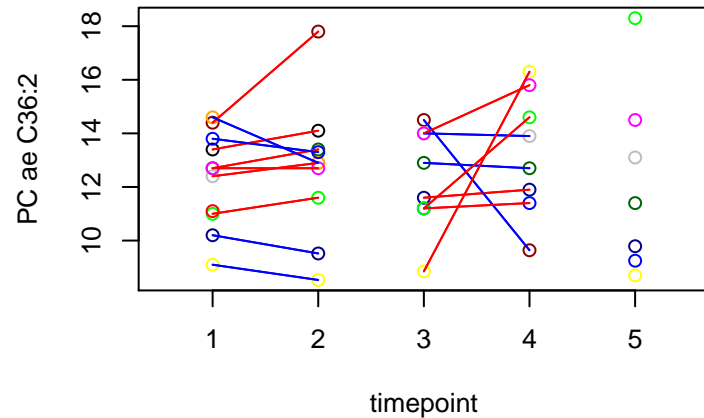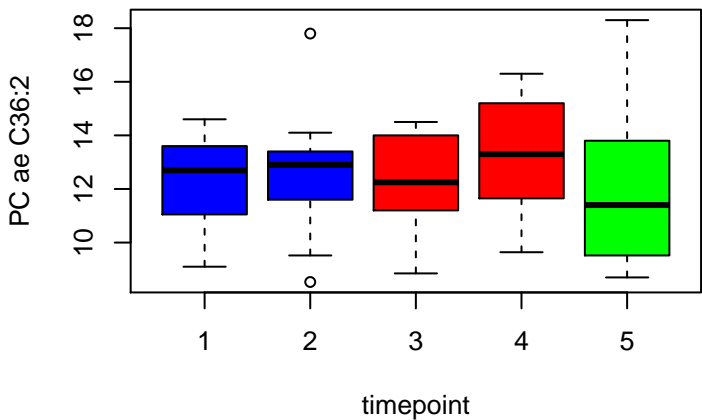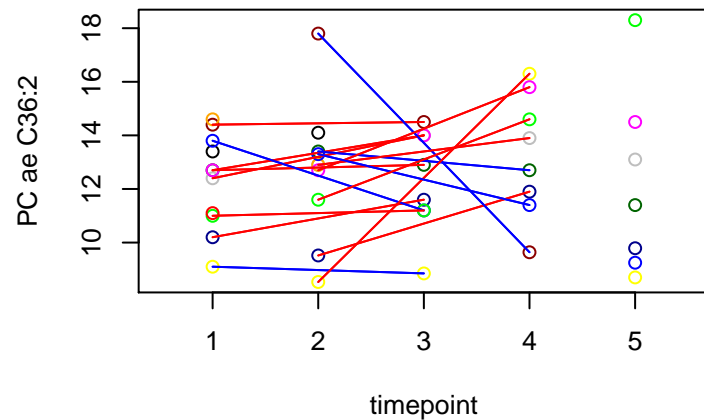

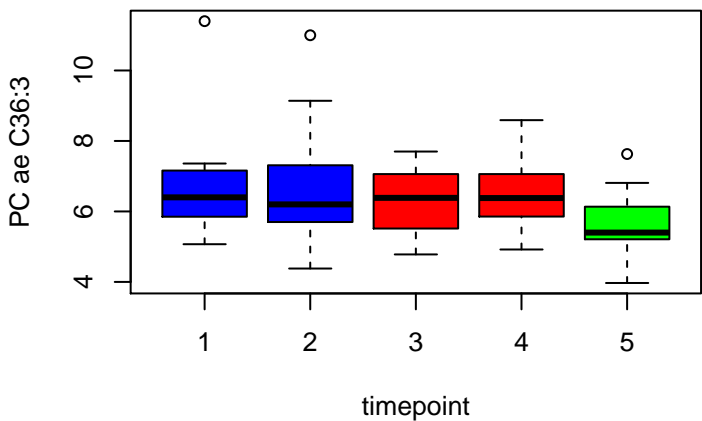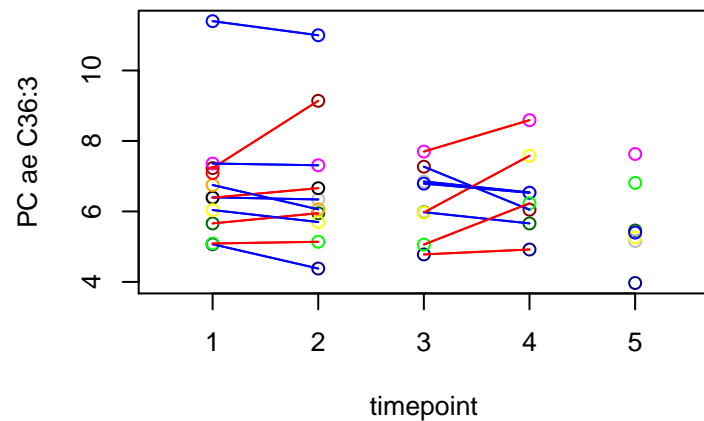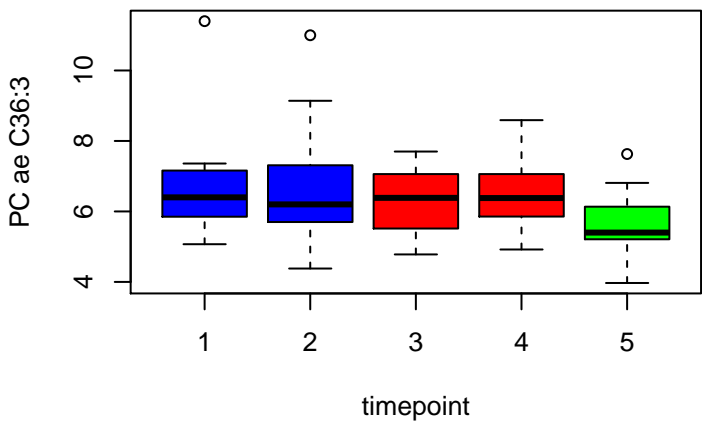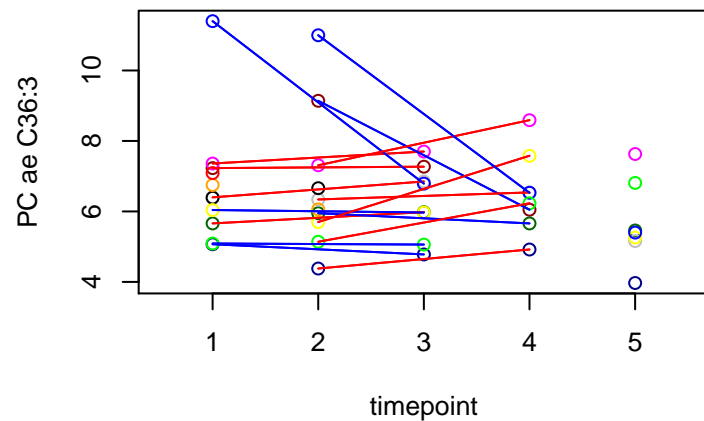

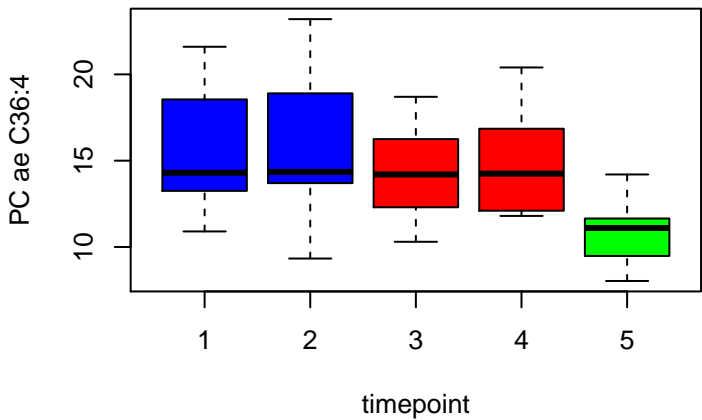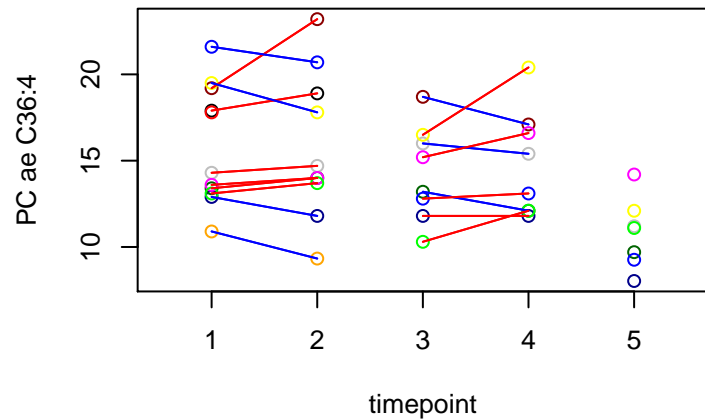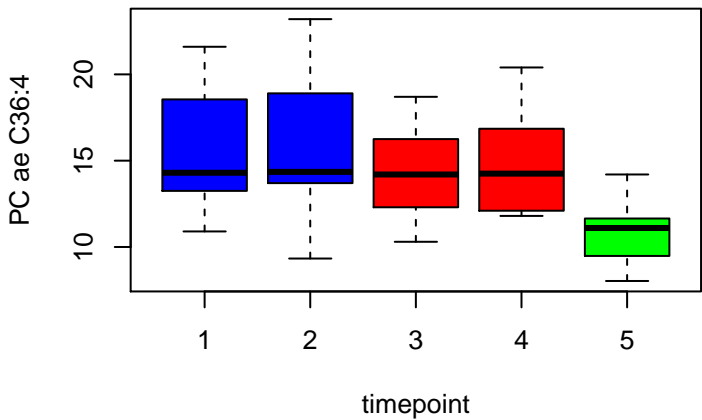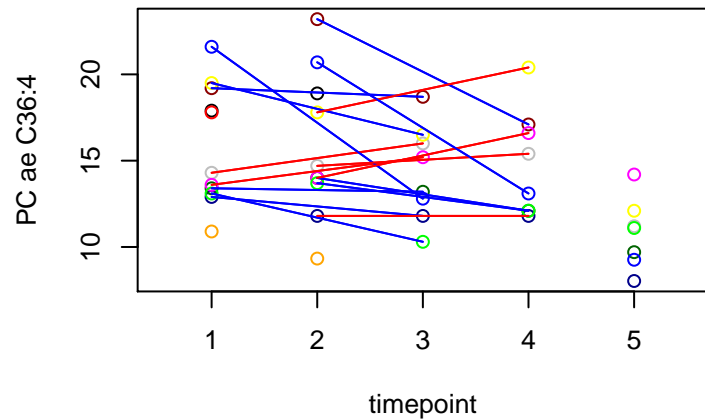

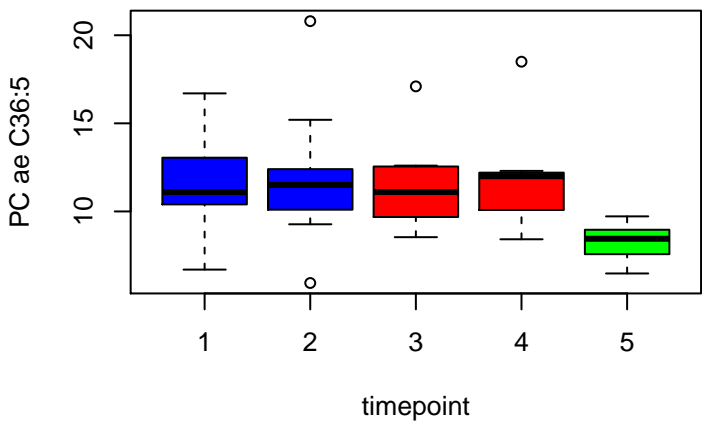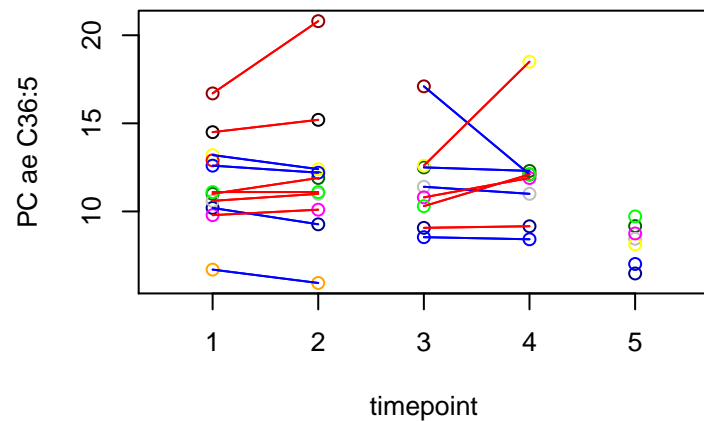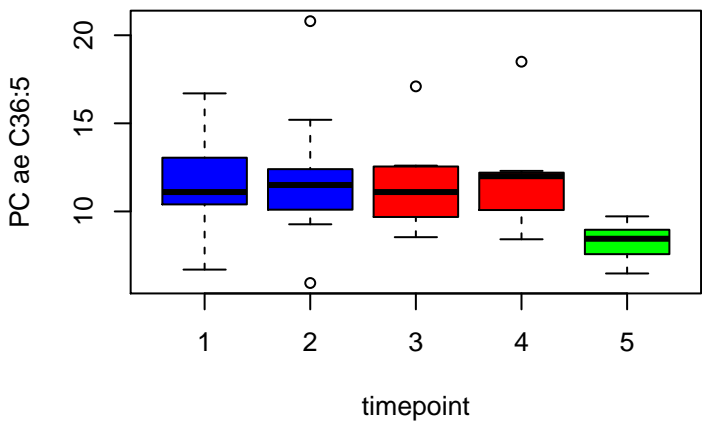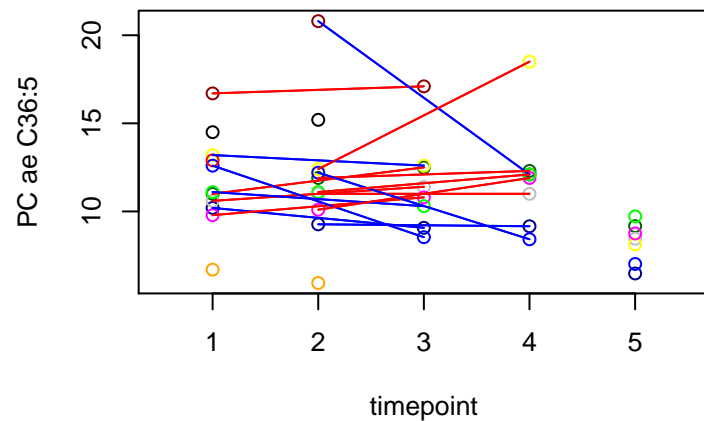



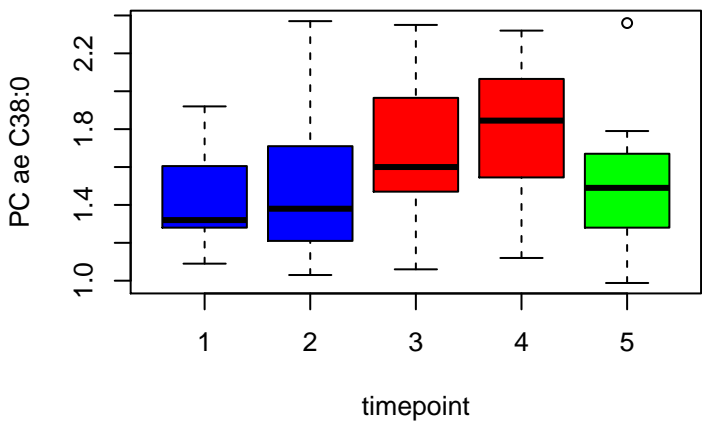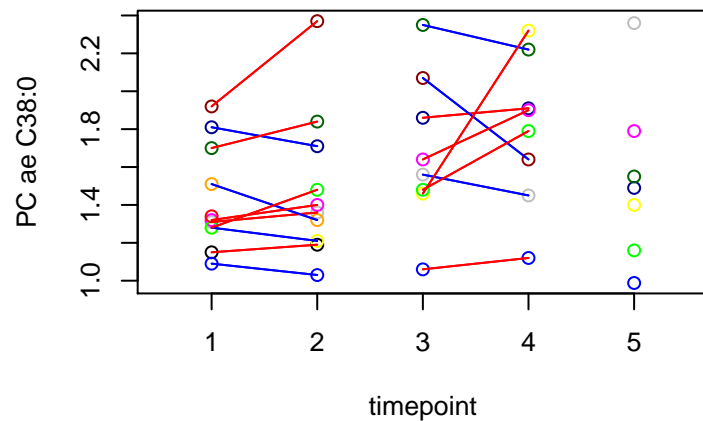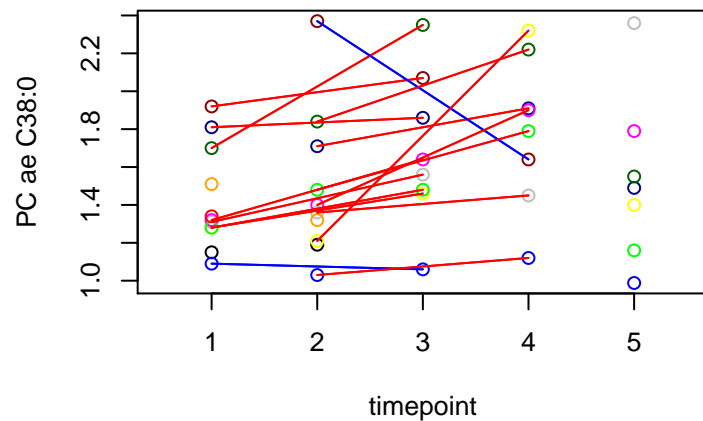

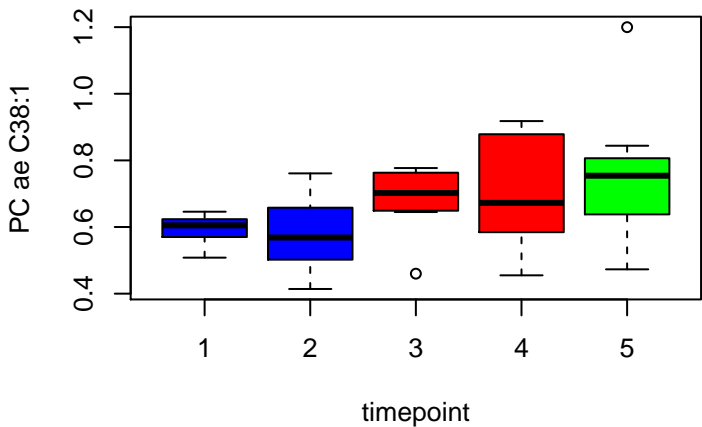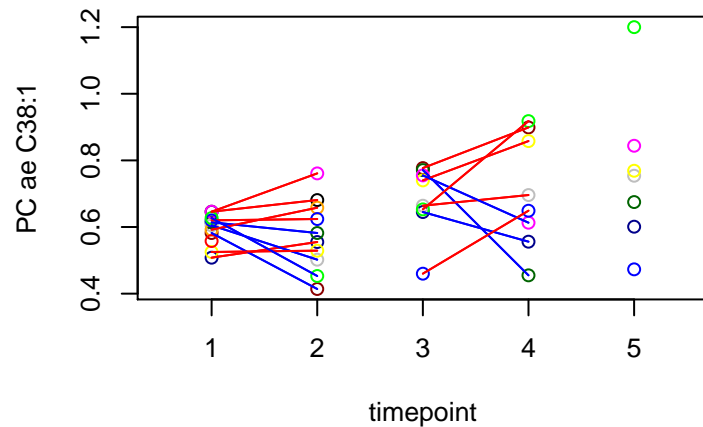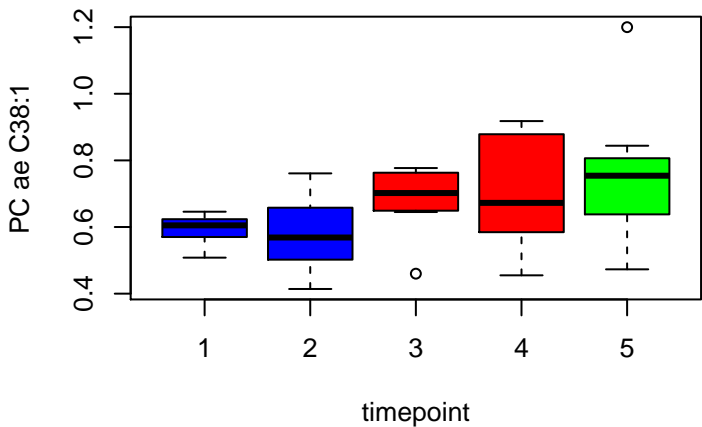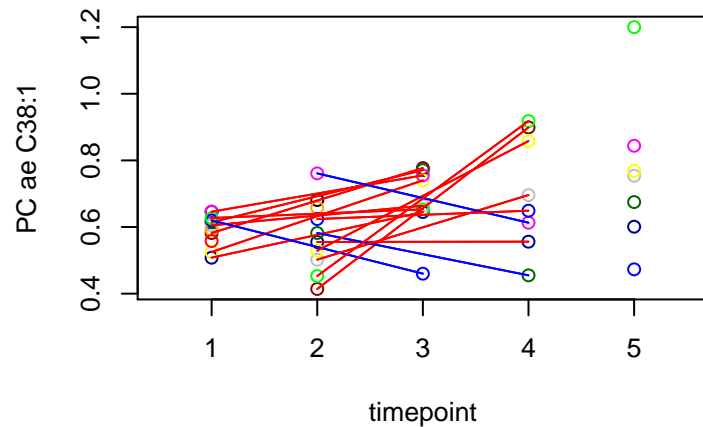

PC ae C38:2

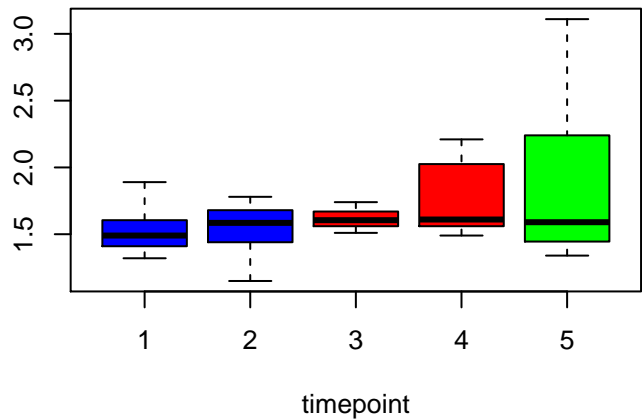

PC ae C38:2

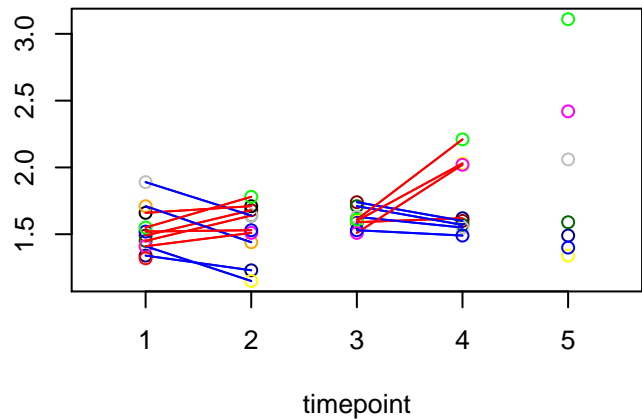

PC ae C38:2



PC ae C38:2

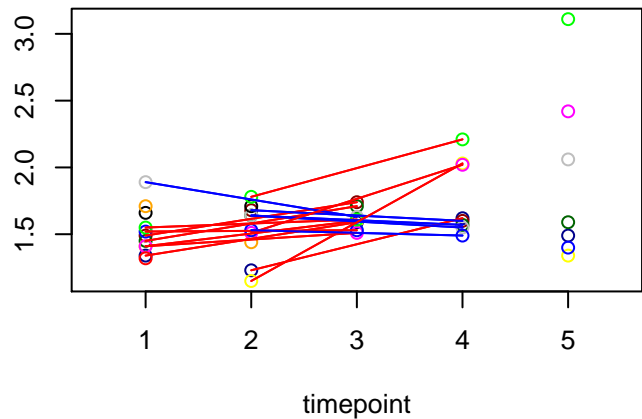

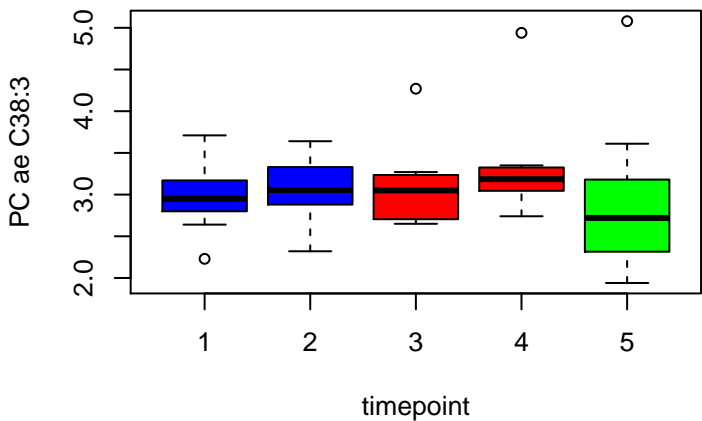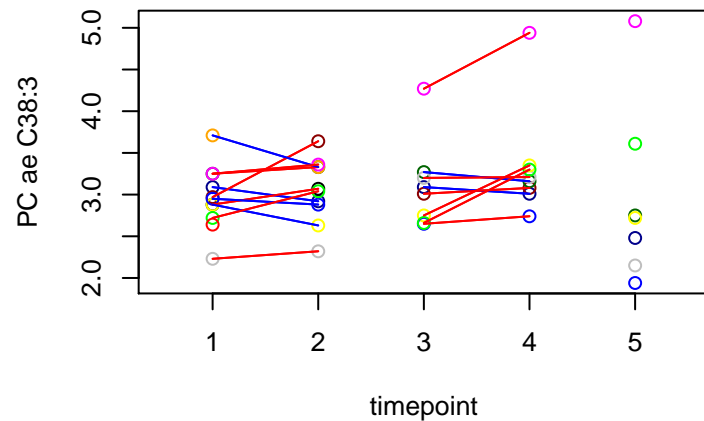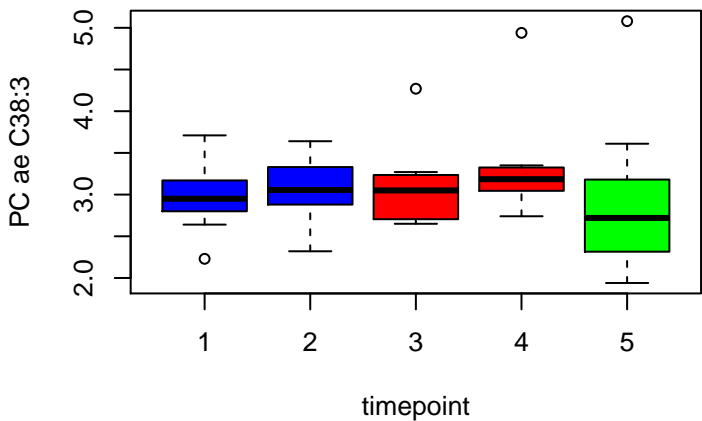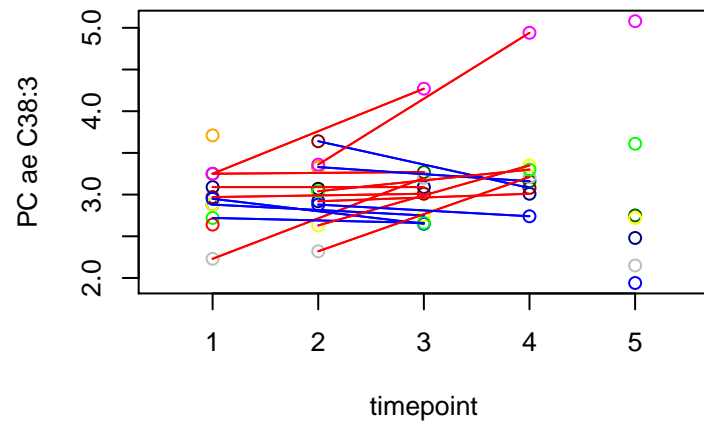

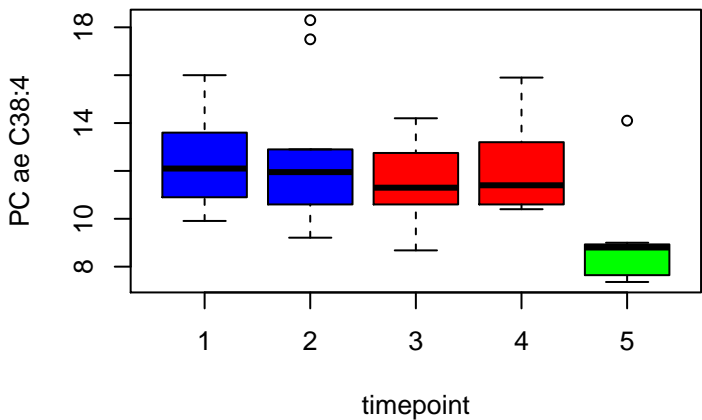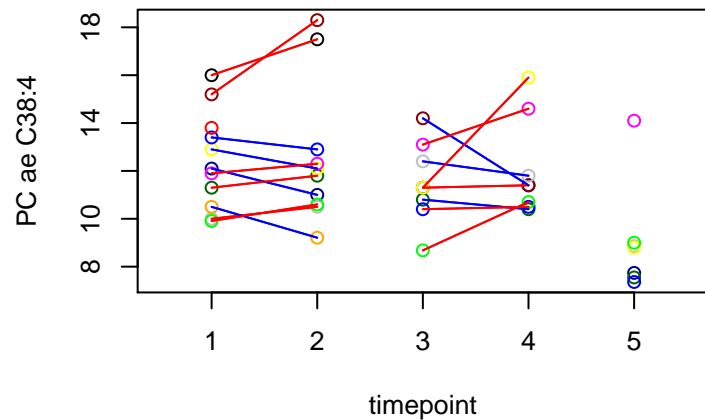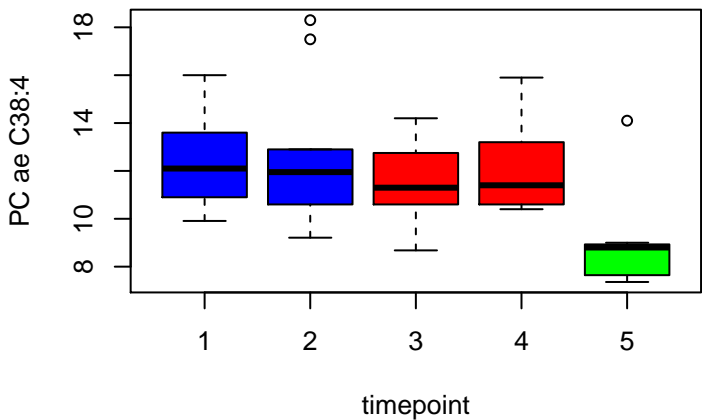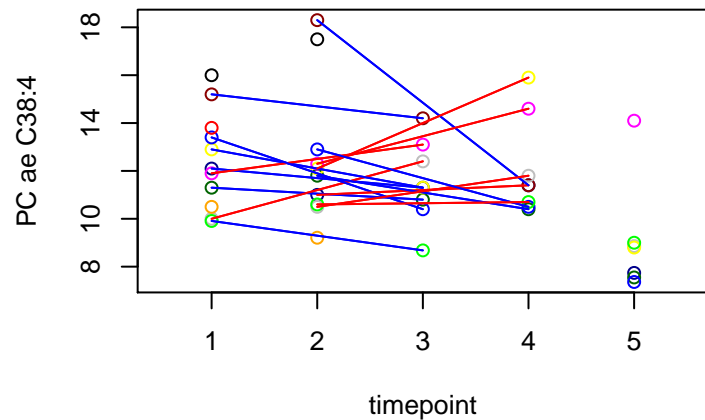

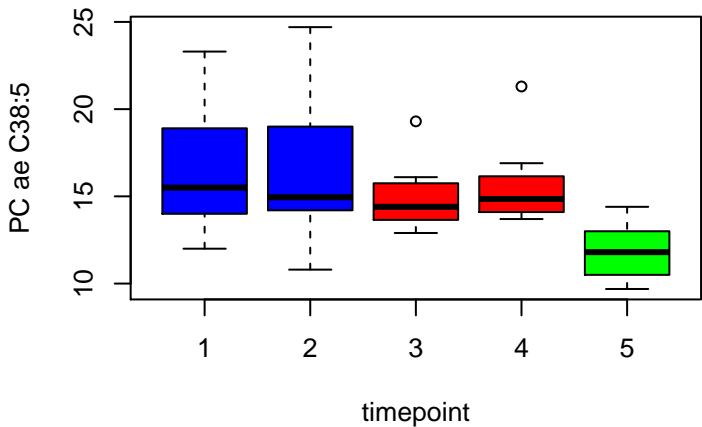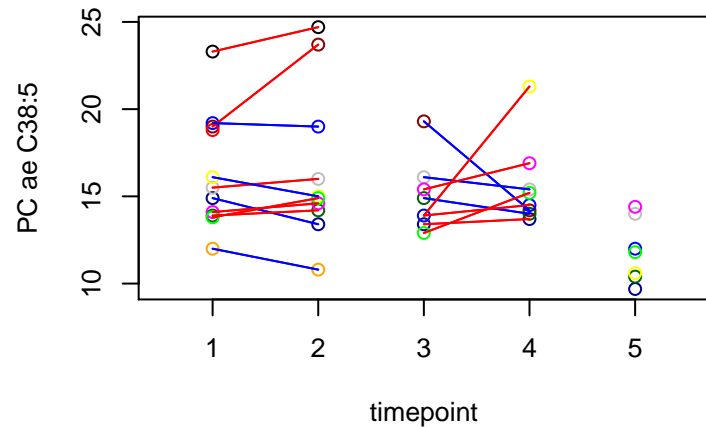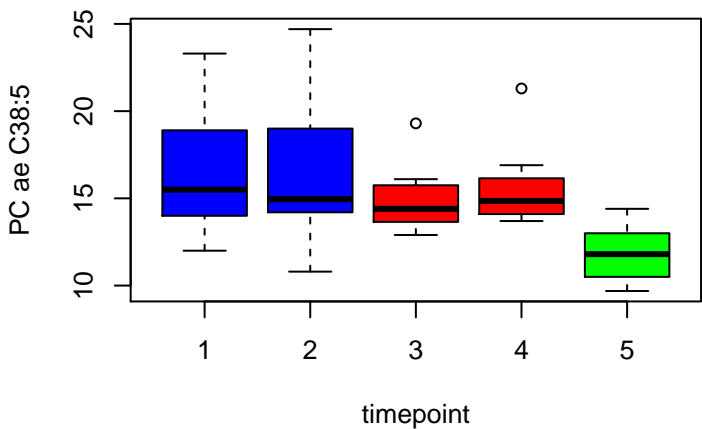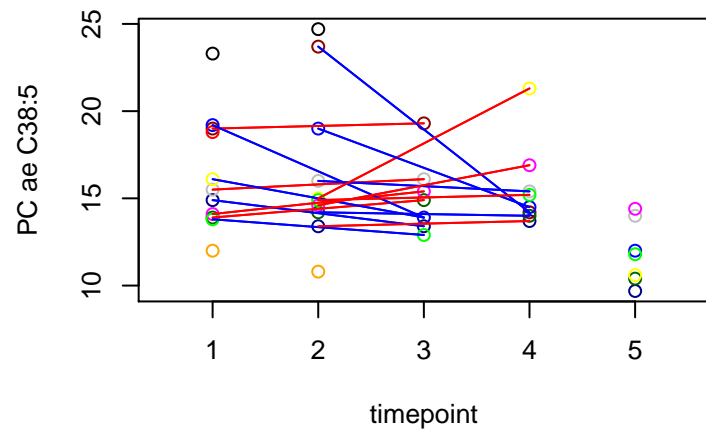

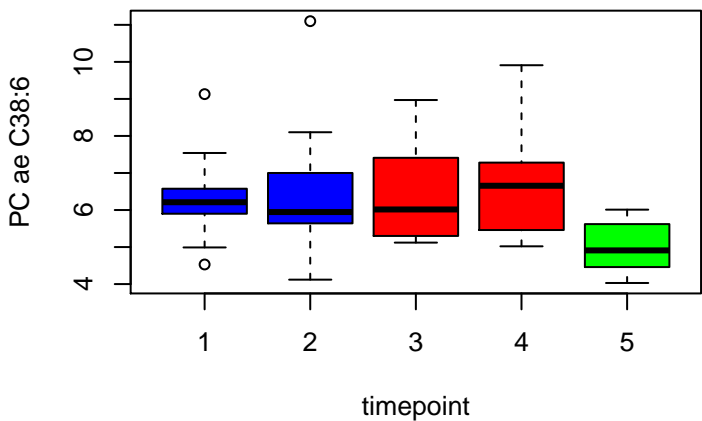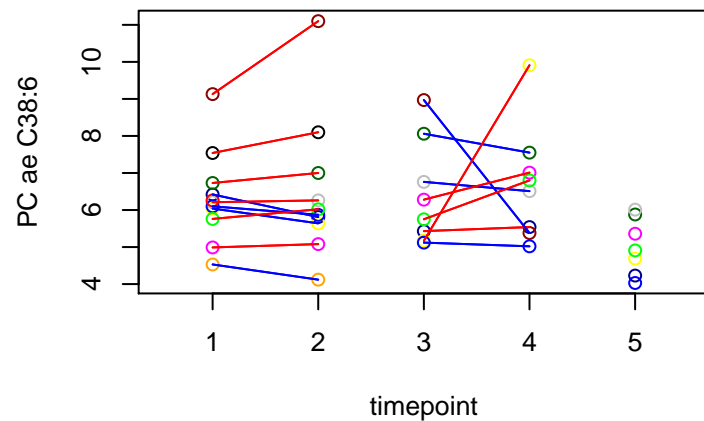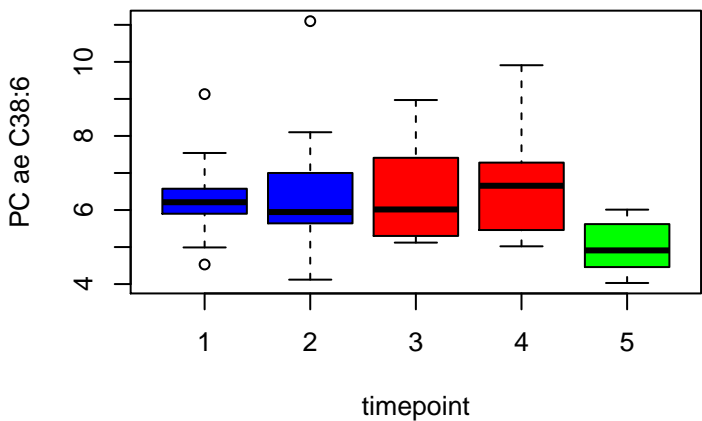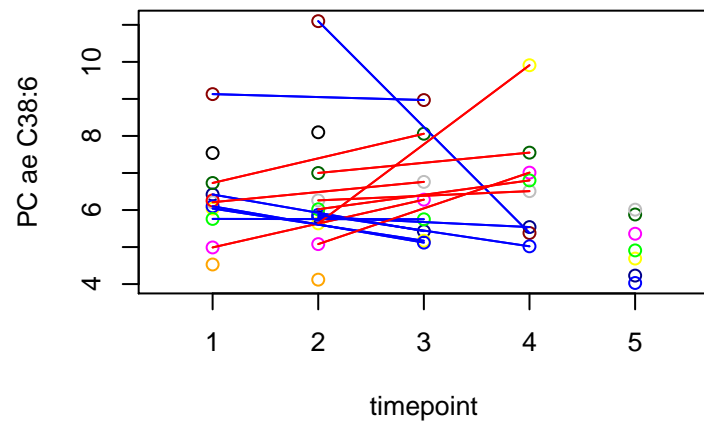

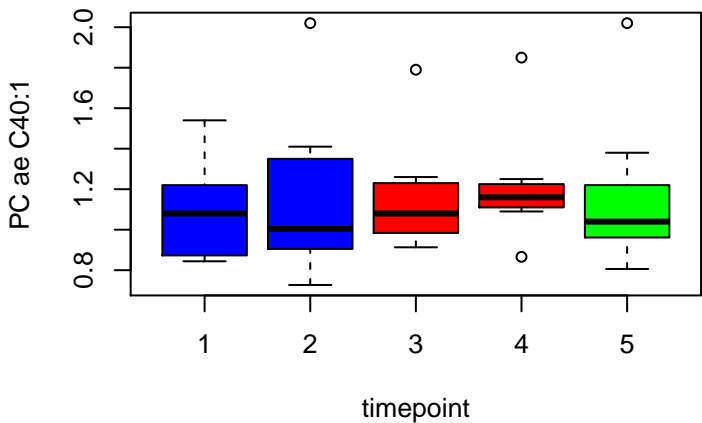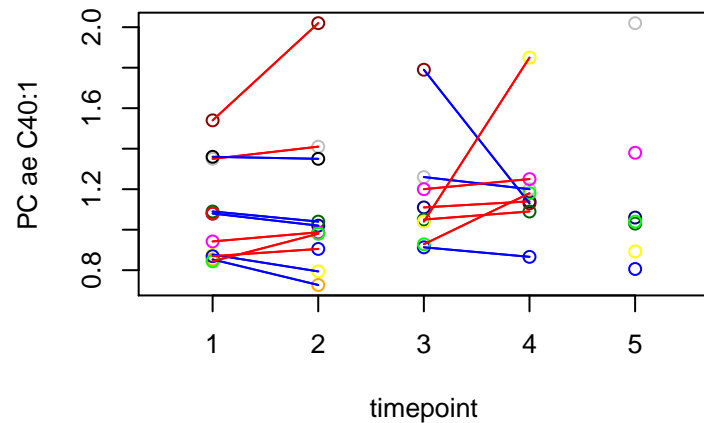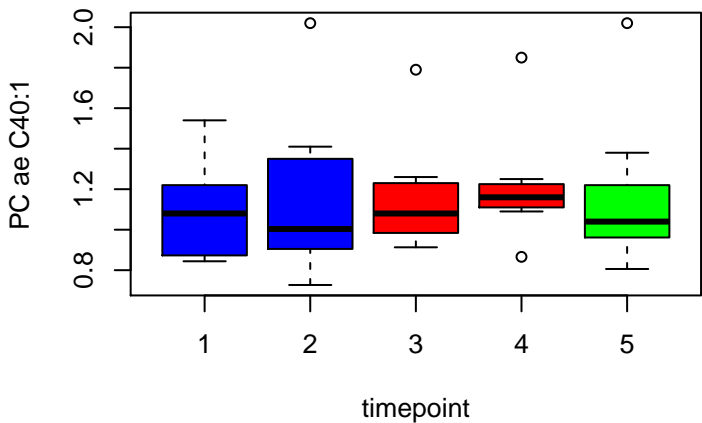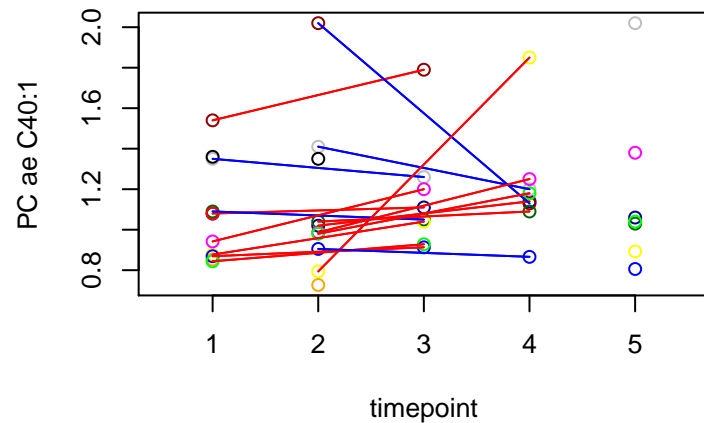



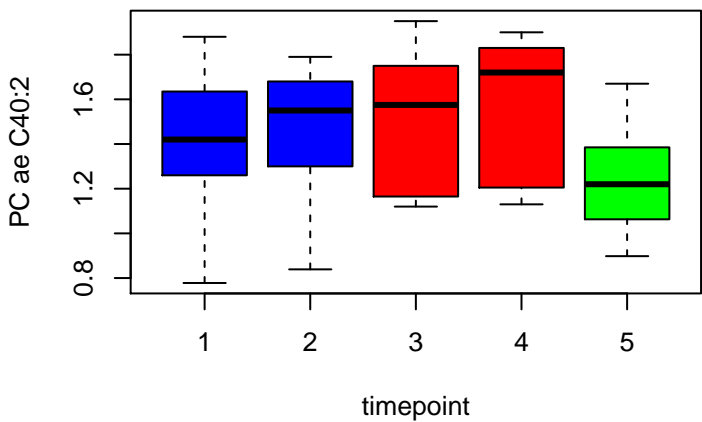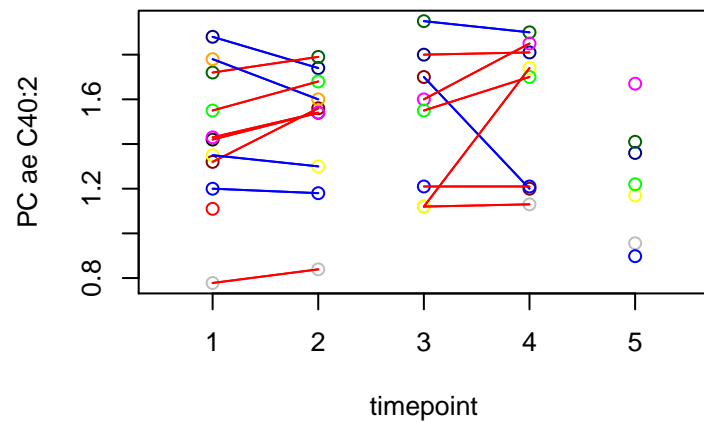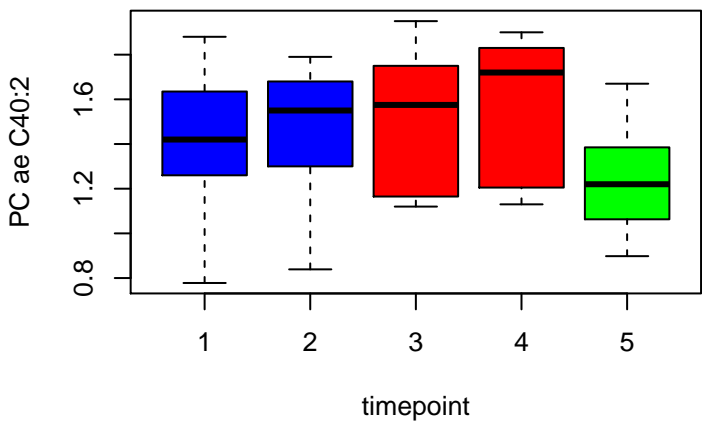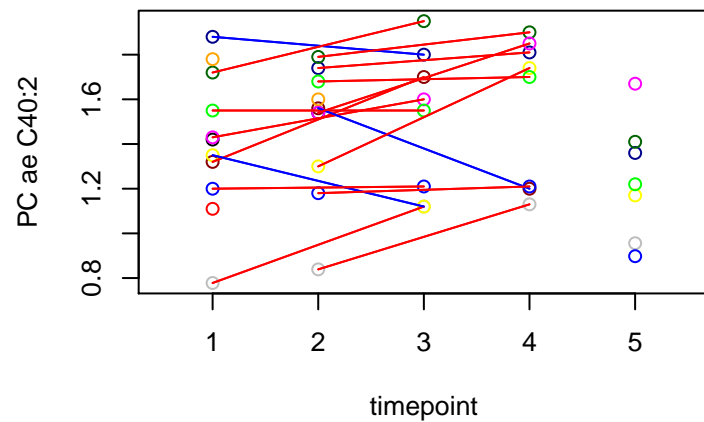

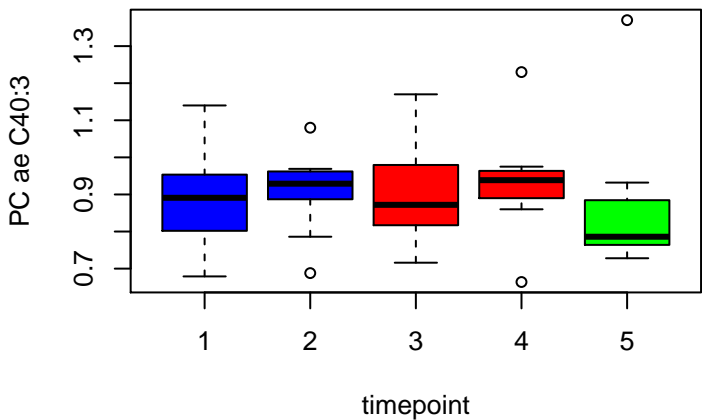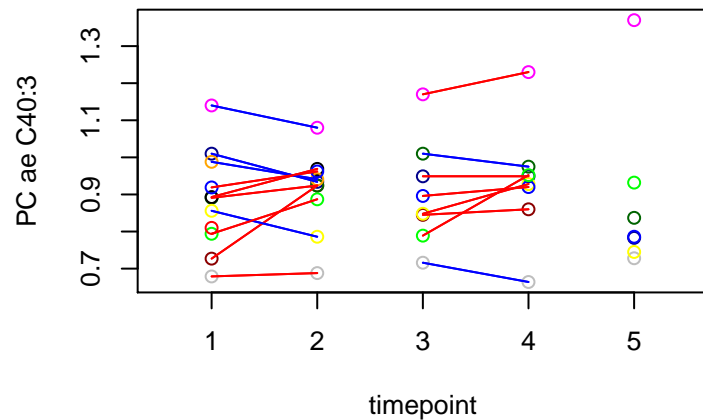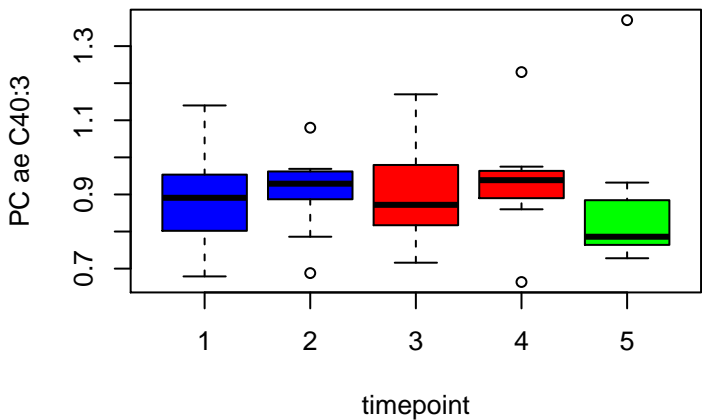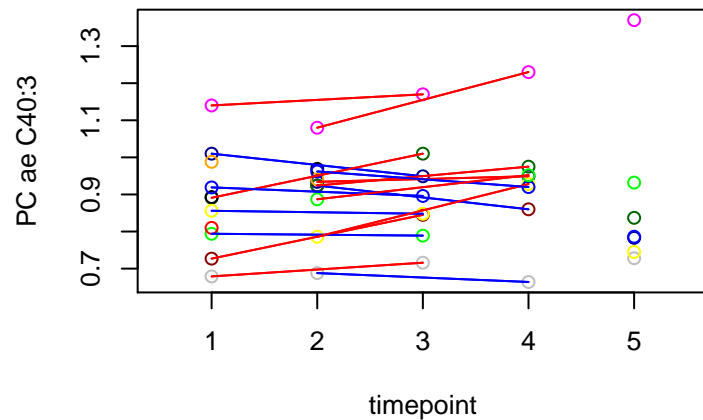

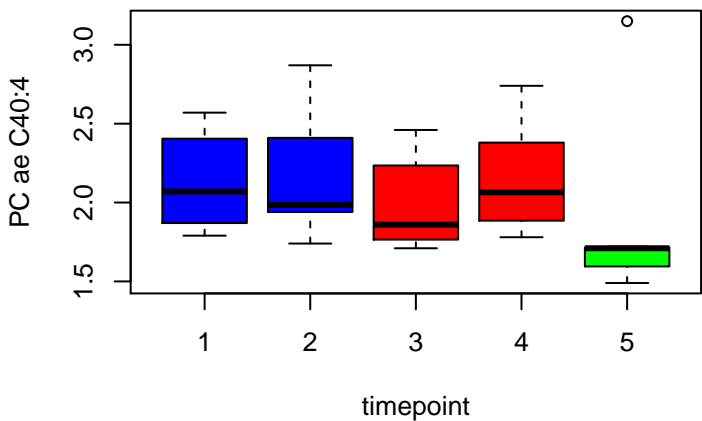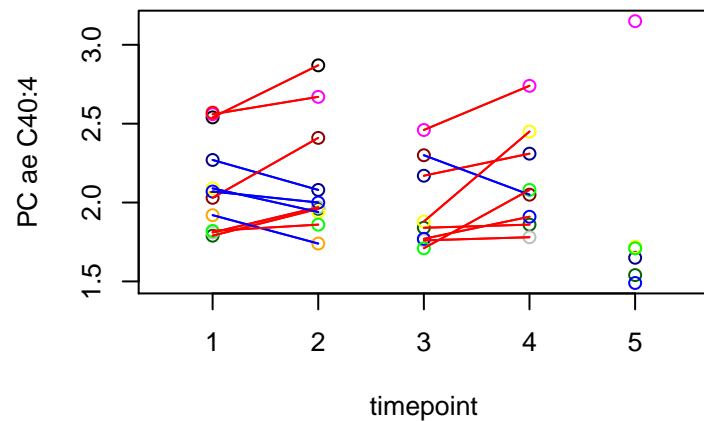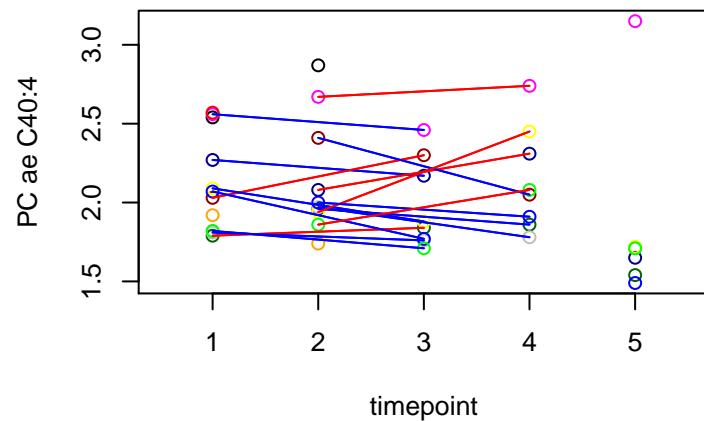

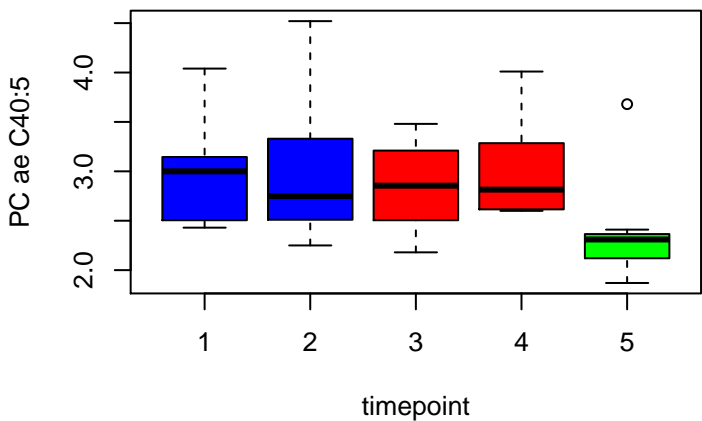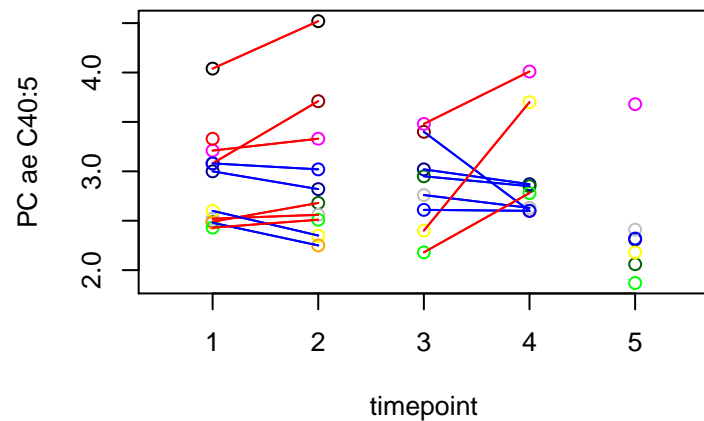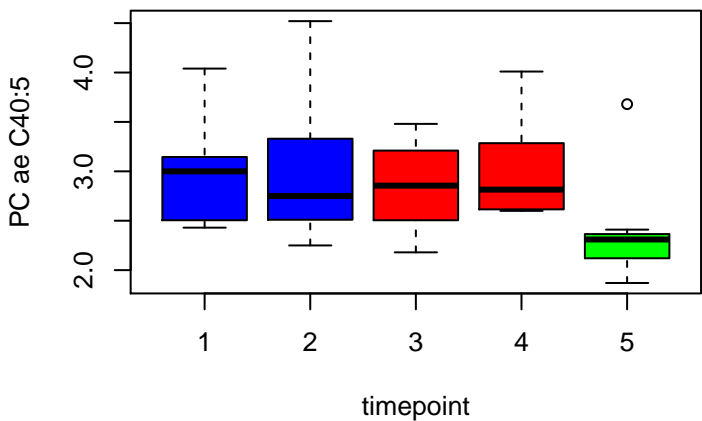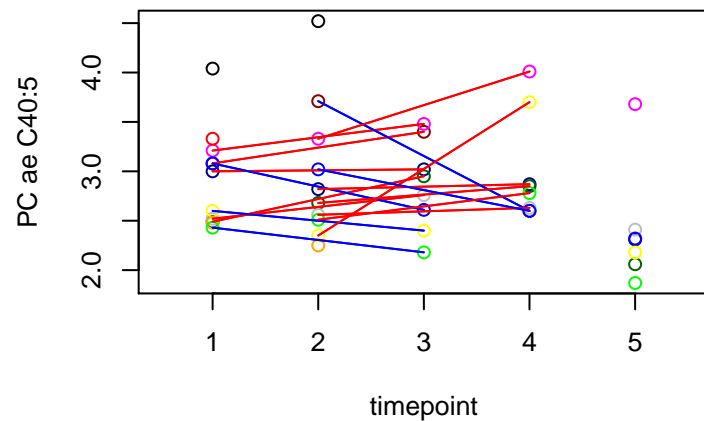

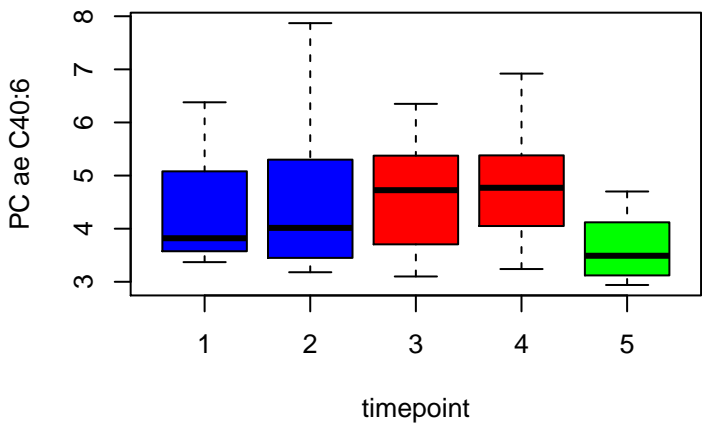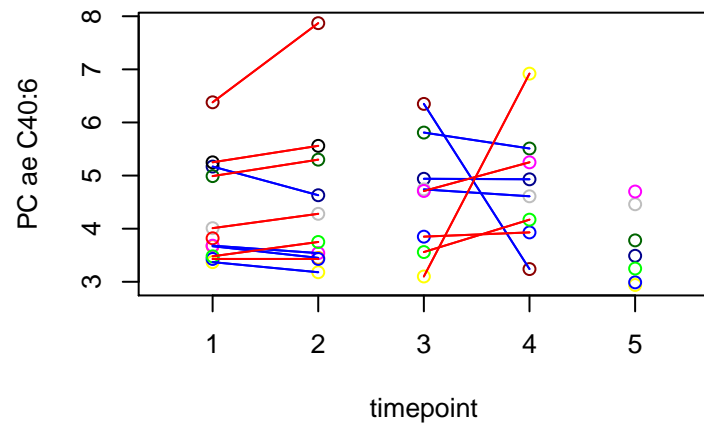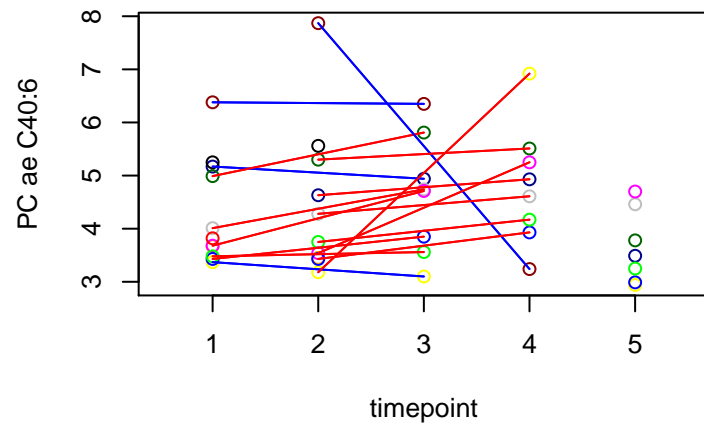

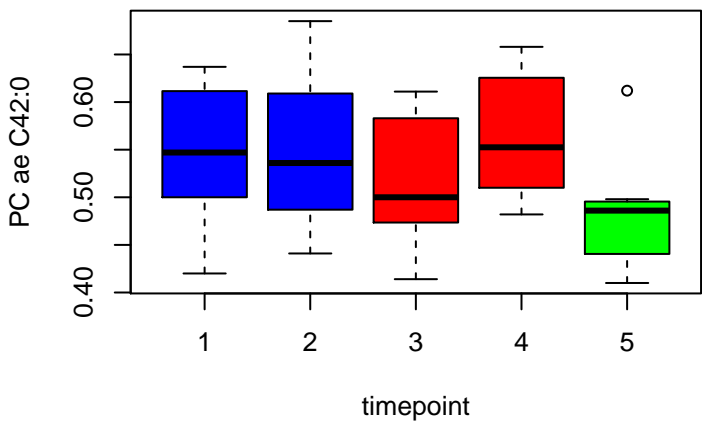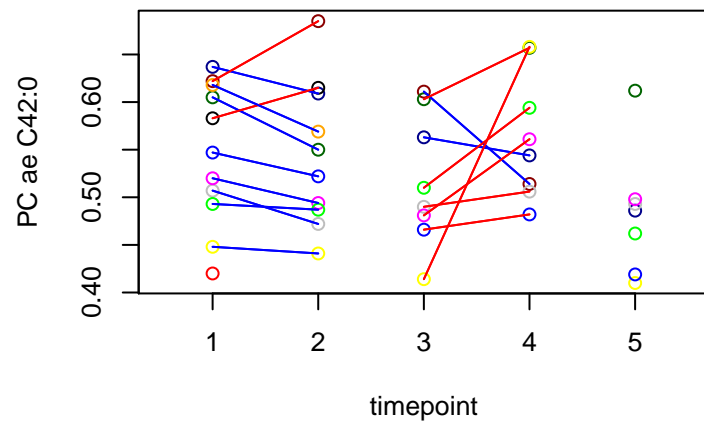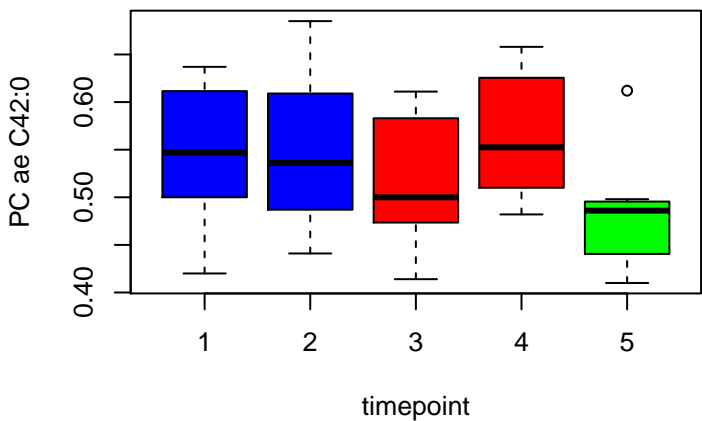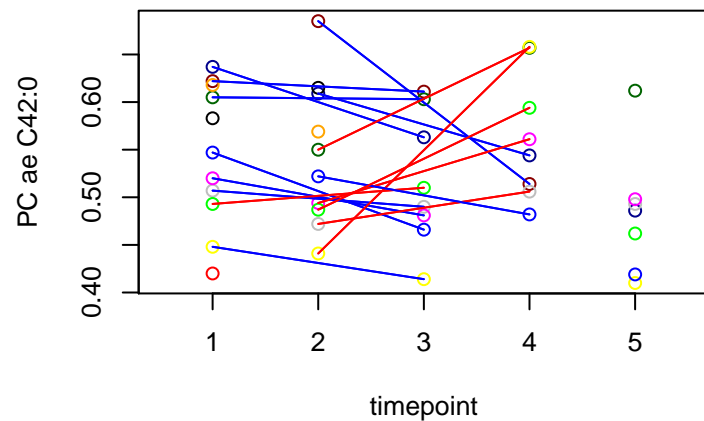

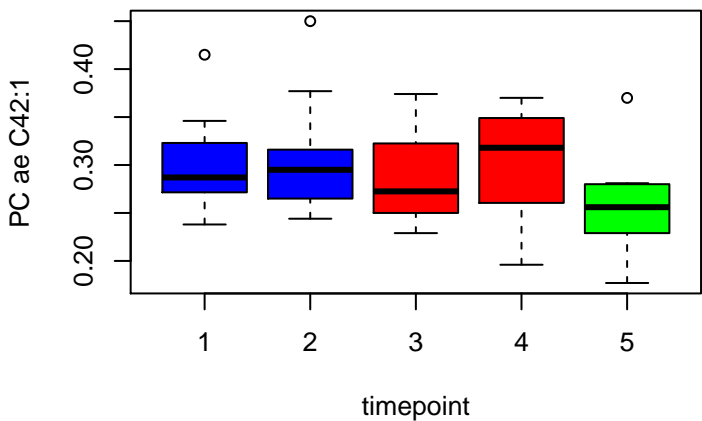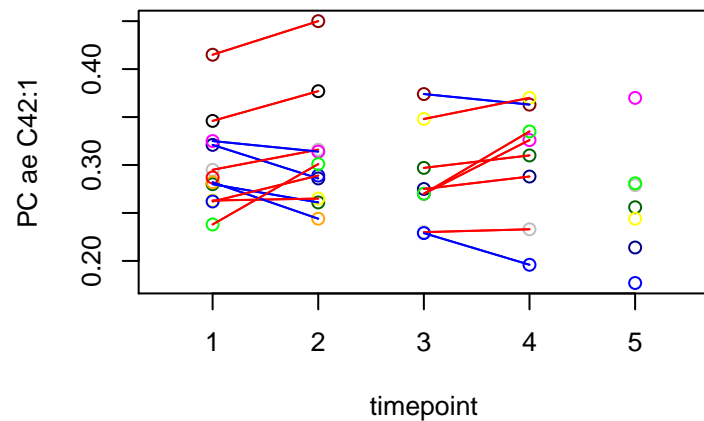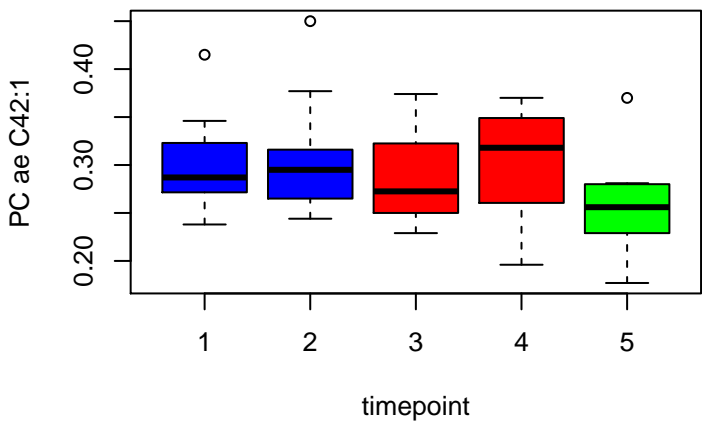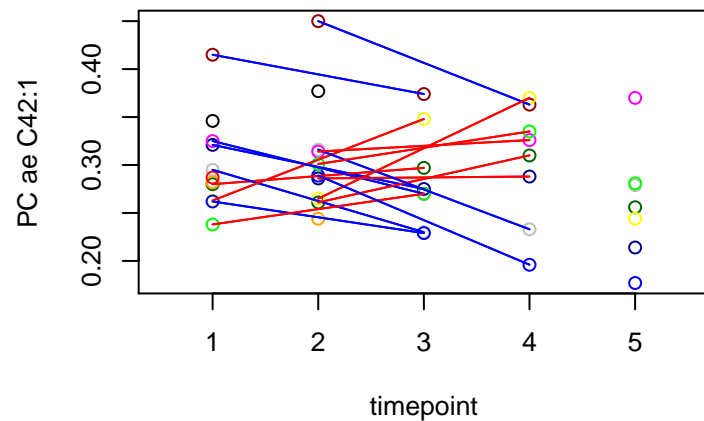

PC ae C42:2

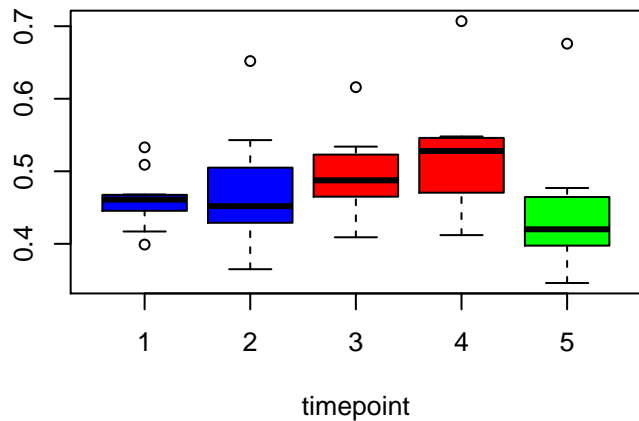

PC ae C42:2

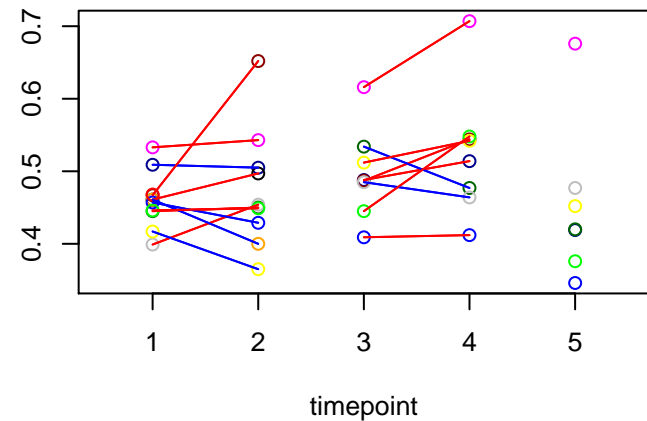

PC ae C42:2

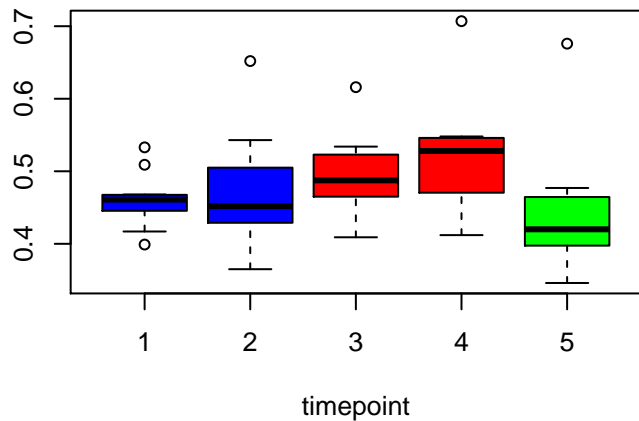

PC ae C42:2

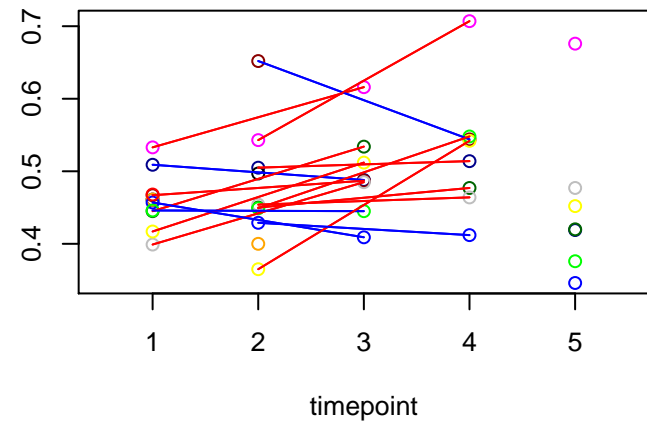



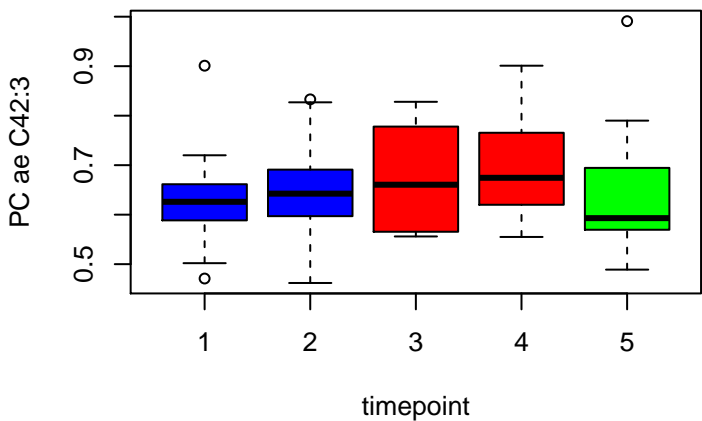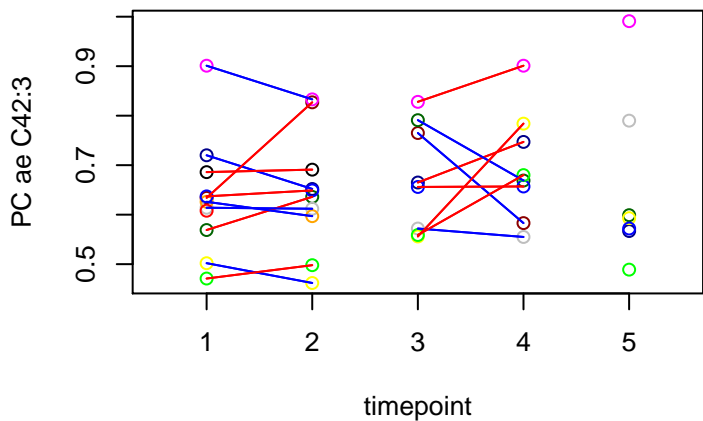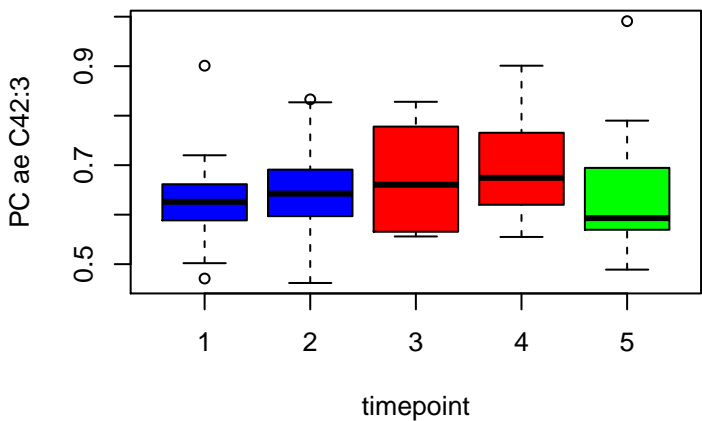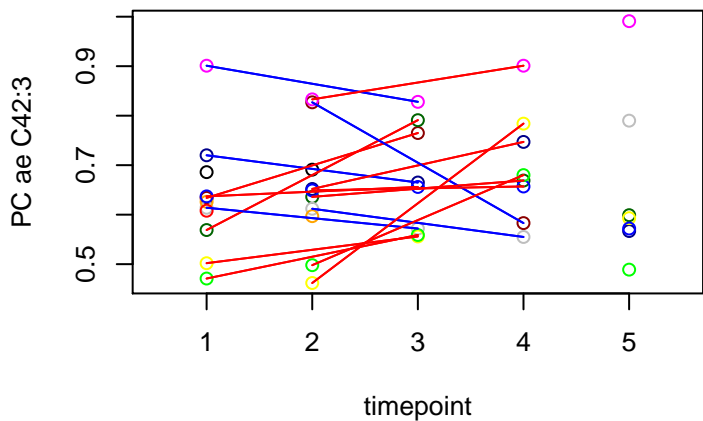

PC ae C42:4

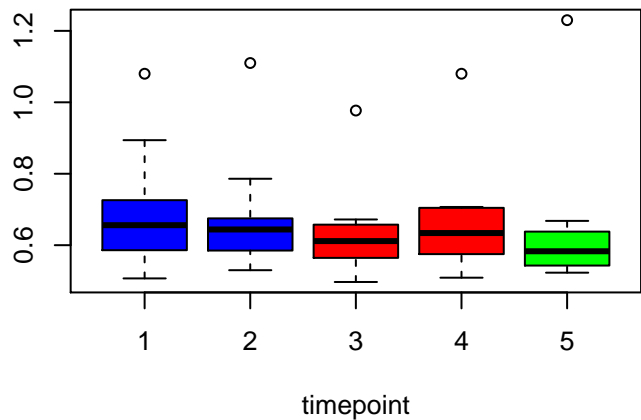

PC ae C42:4

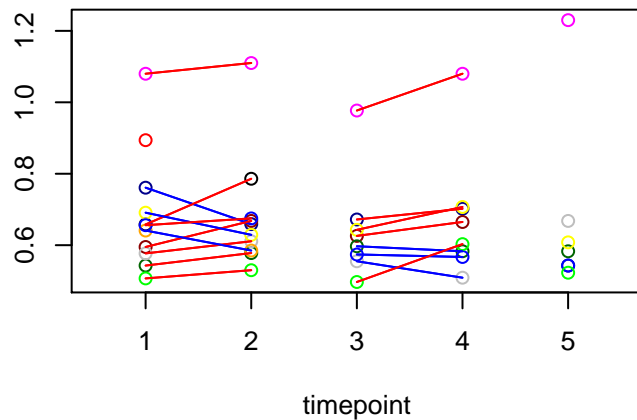

PC ae C42:4

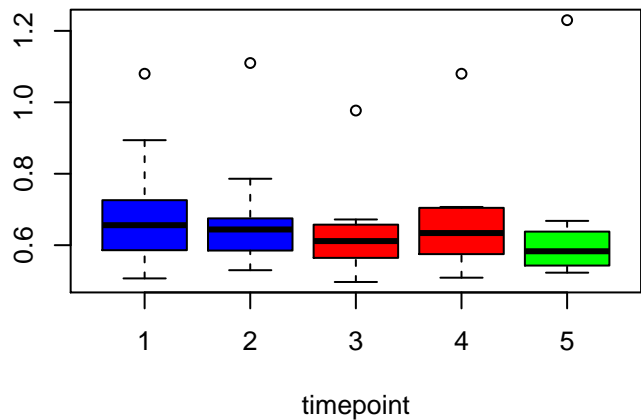

PC ae C42:4

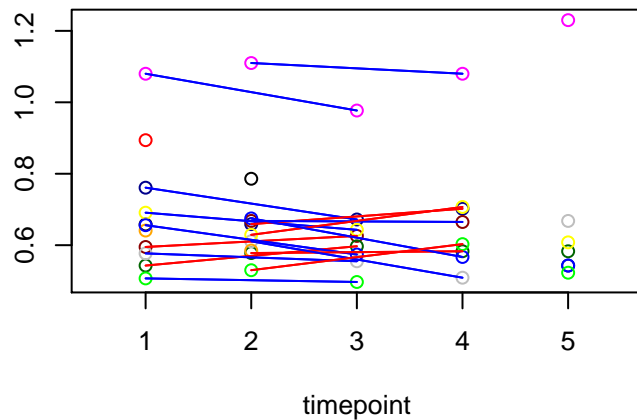

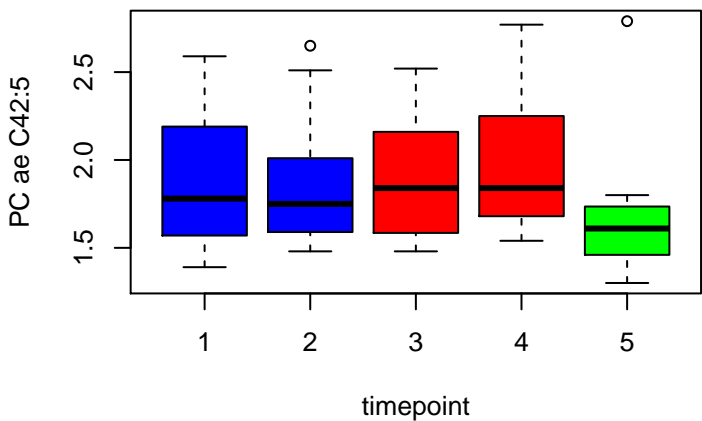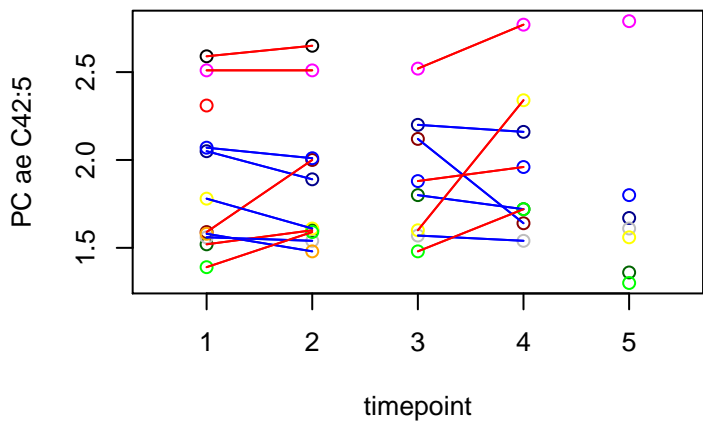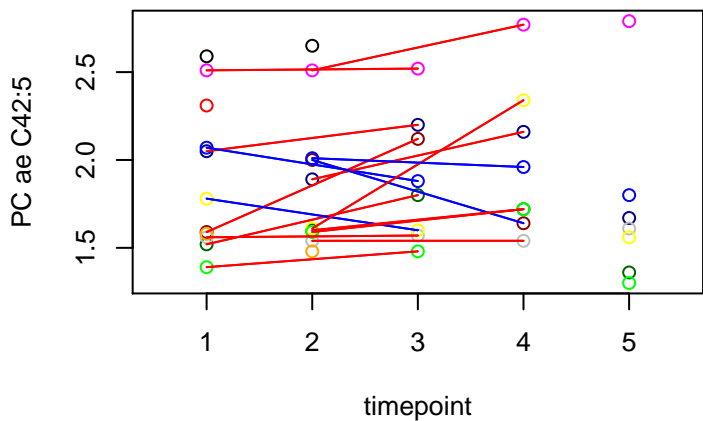

PC ae C44:3

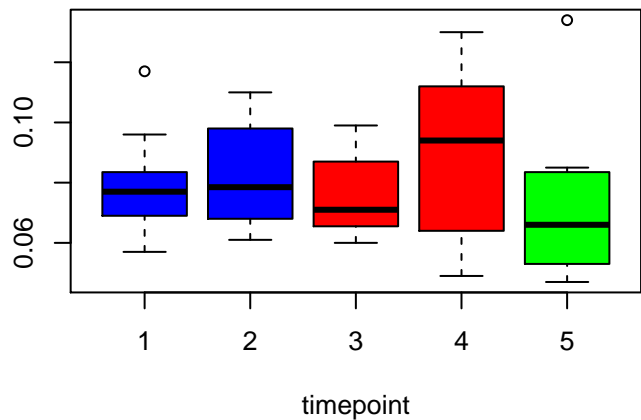

PC ae C44:3

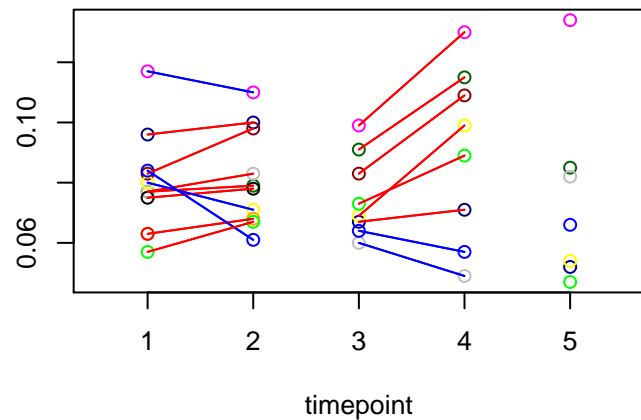

PC ae C44:3

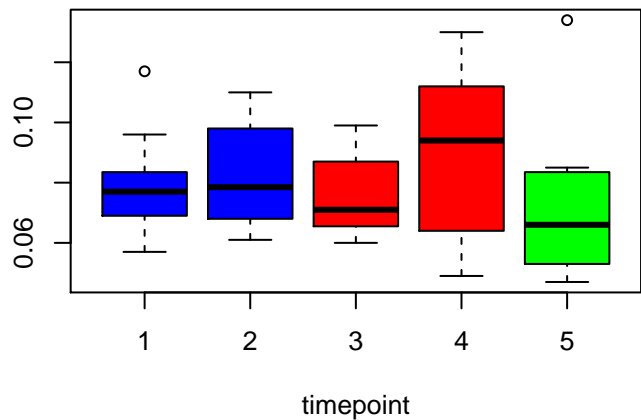

PC ae C44:3

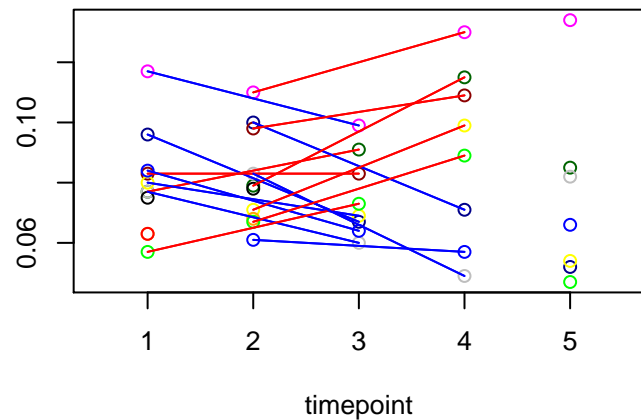

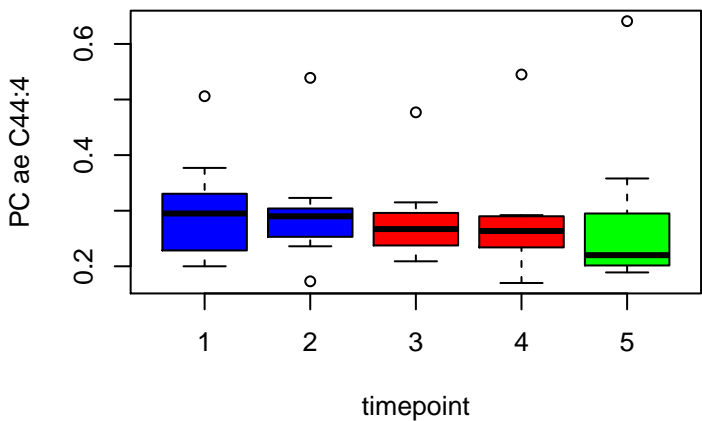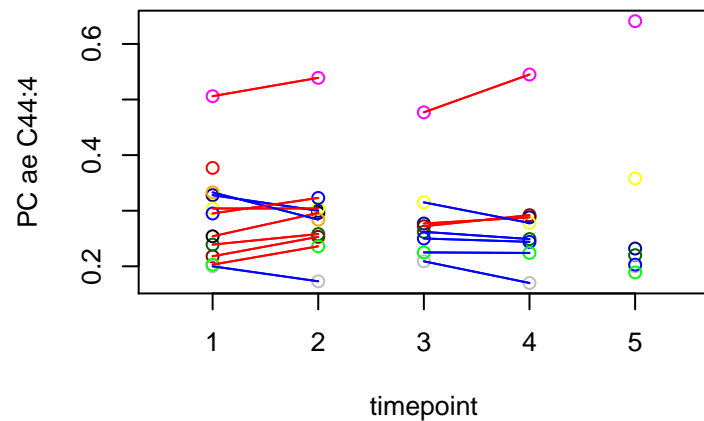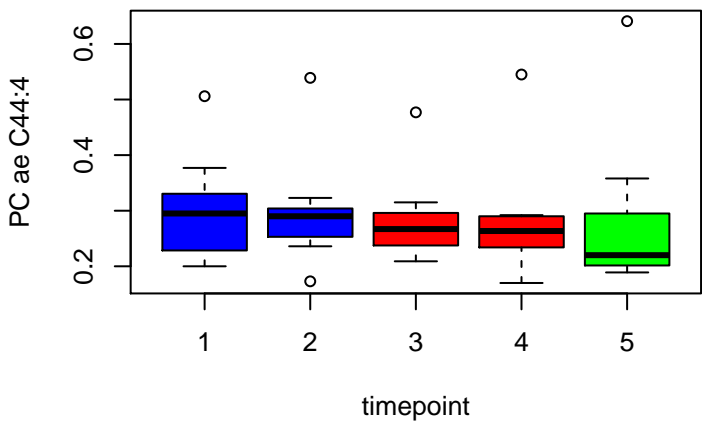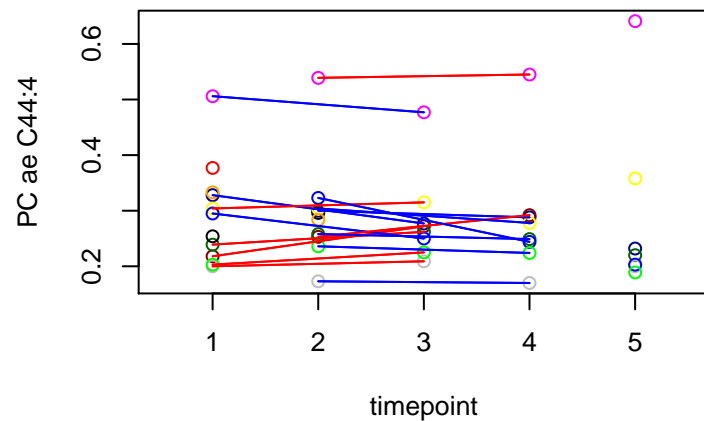

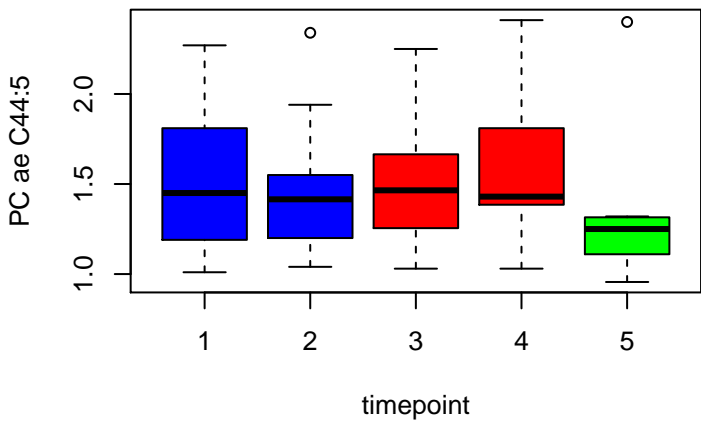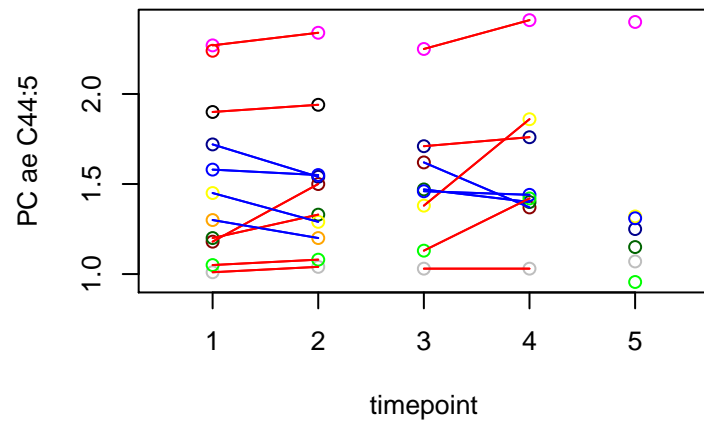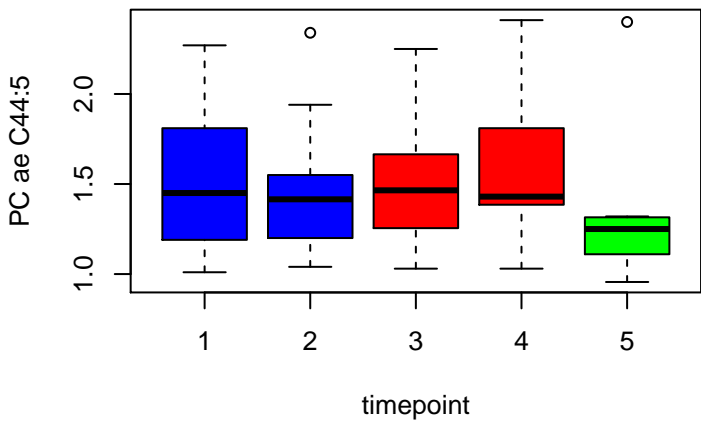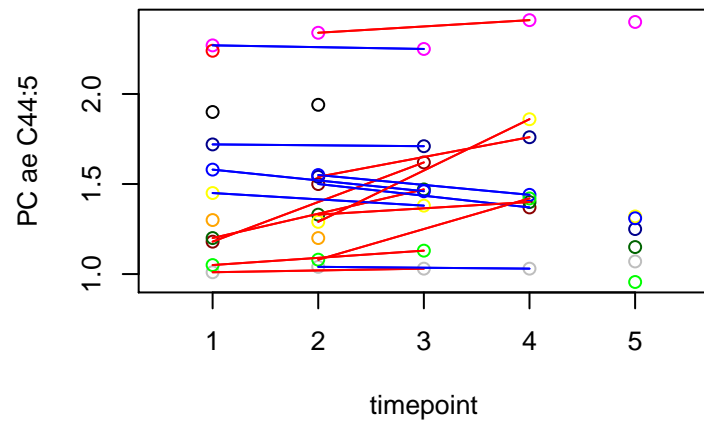

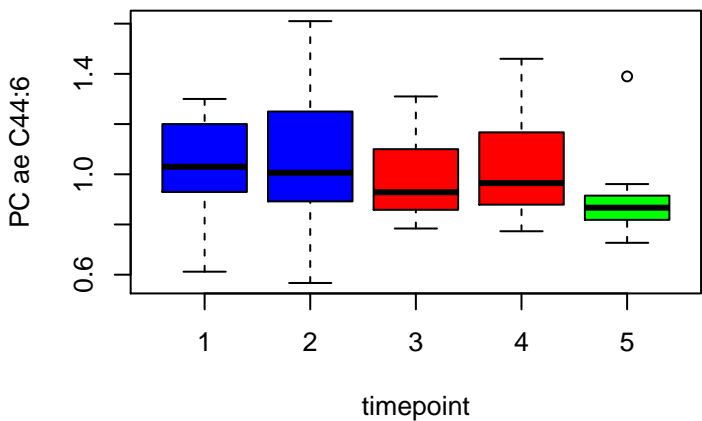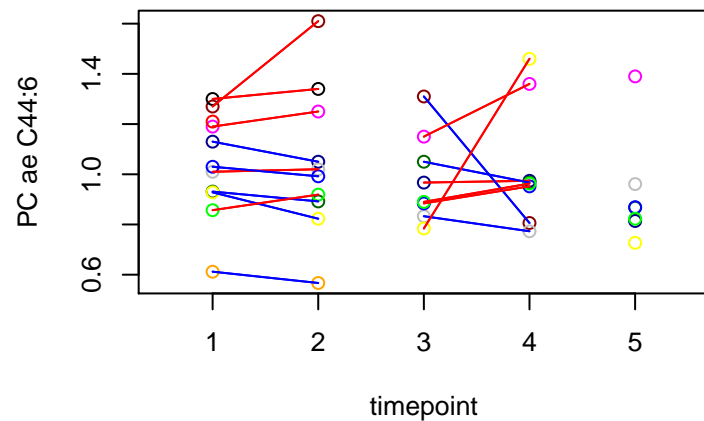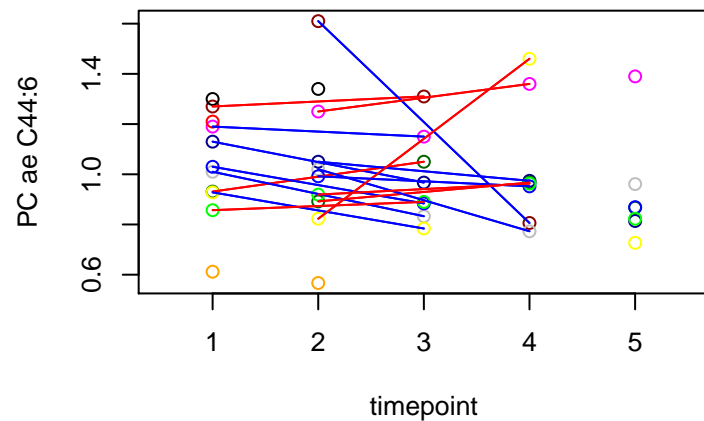

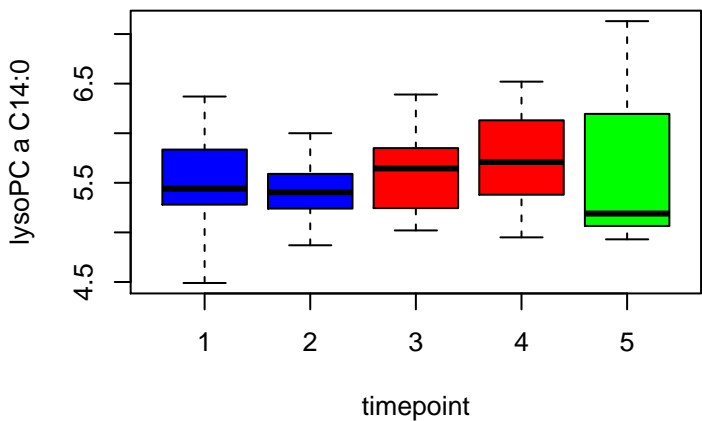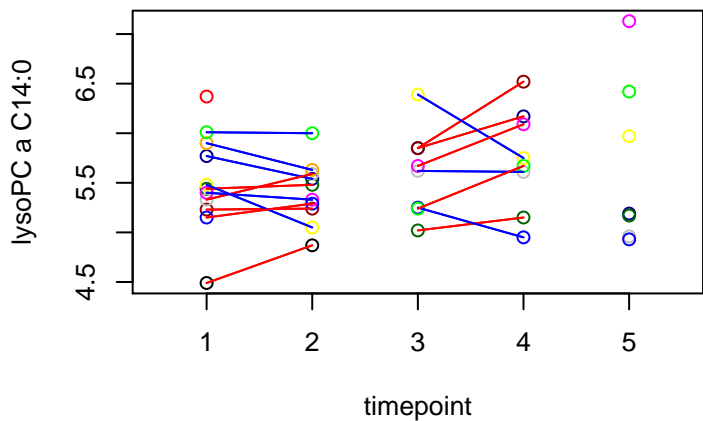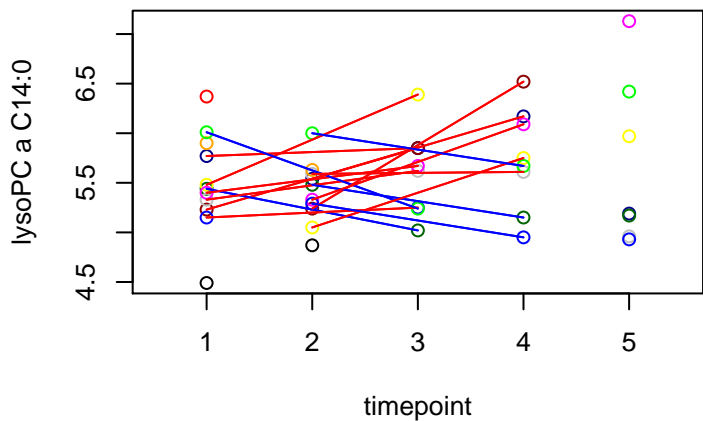



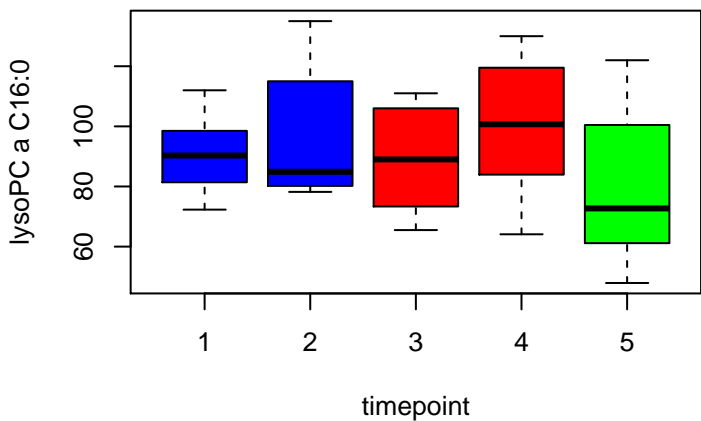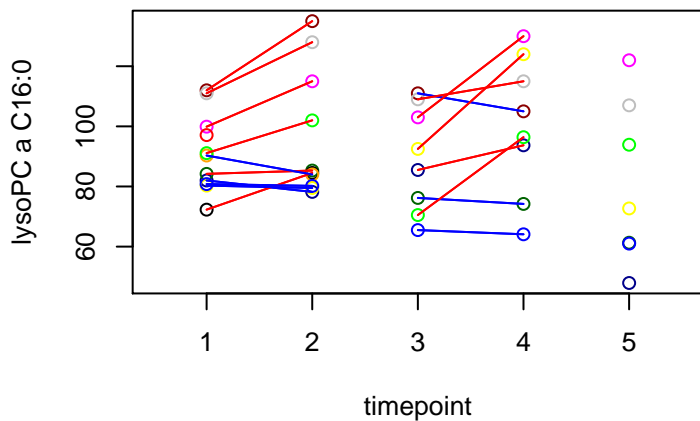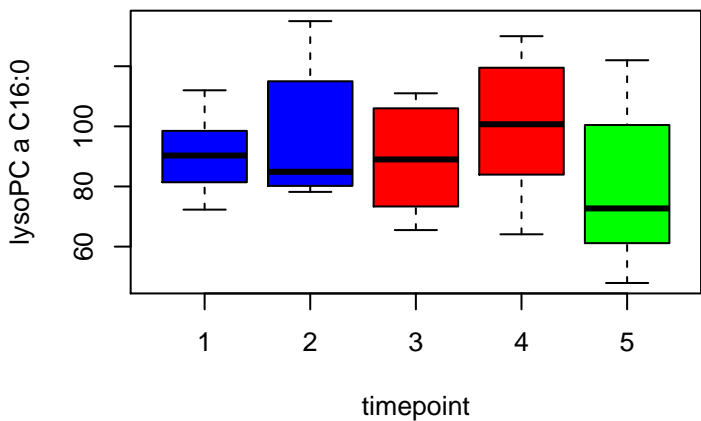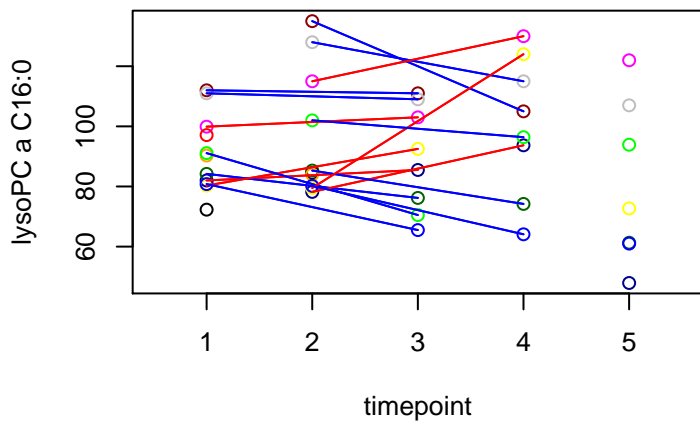

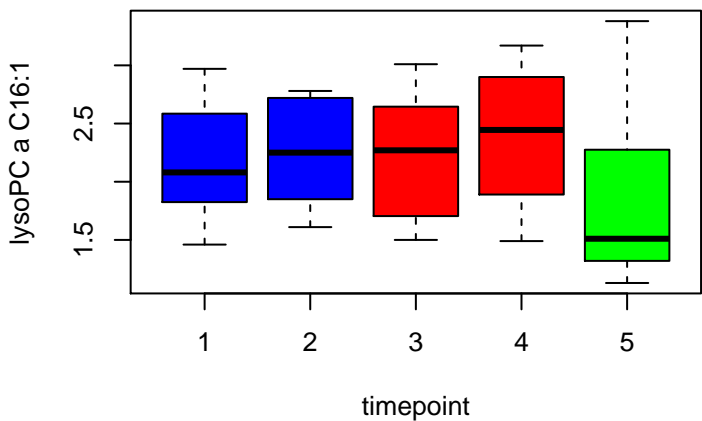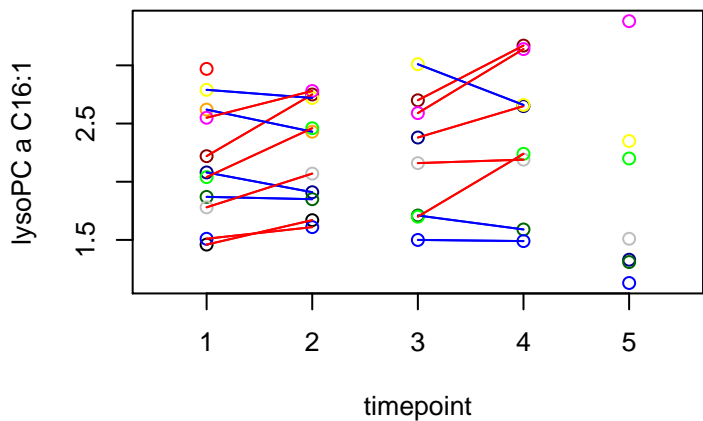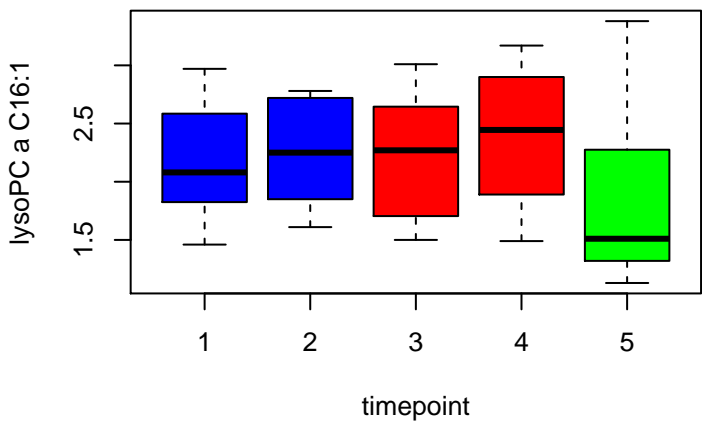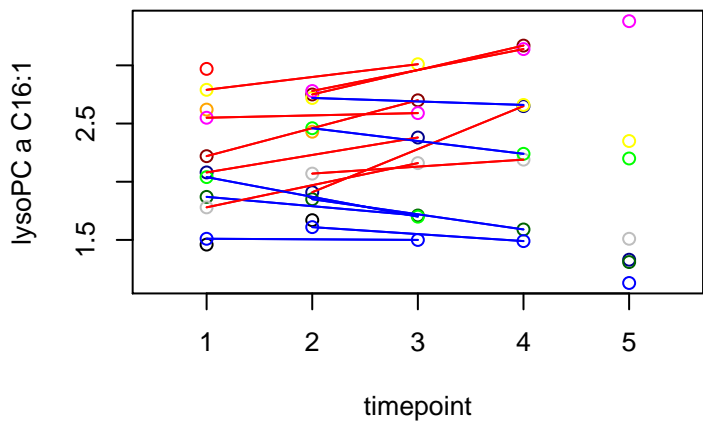

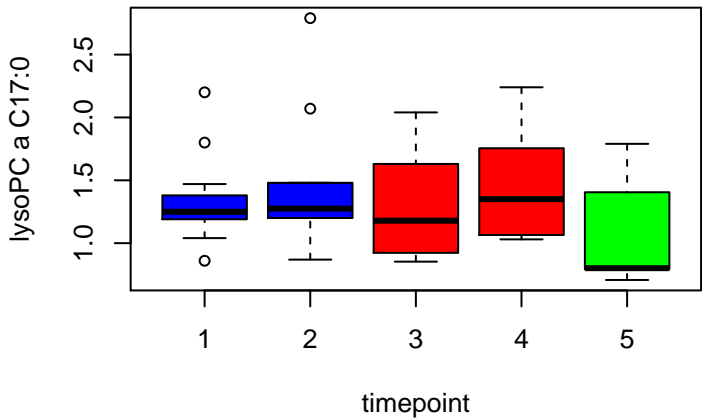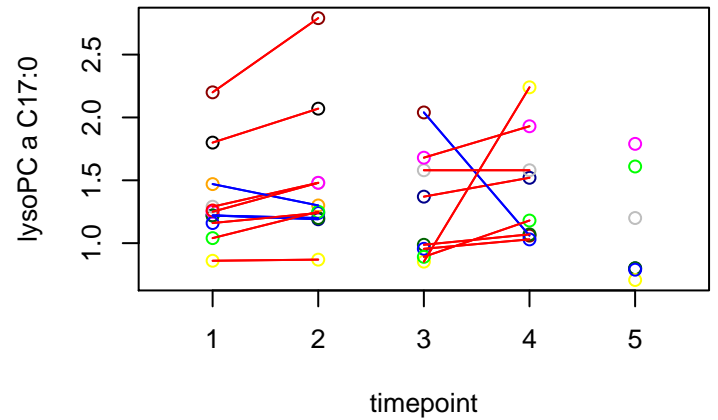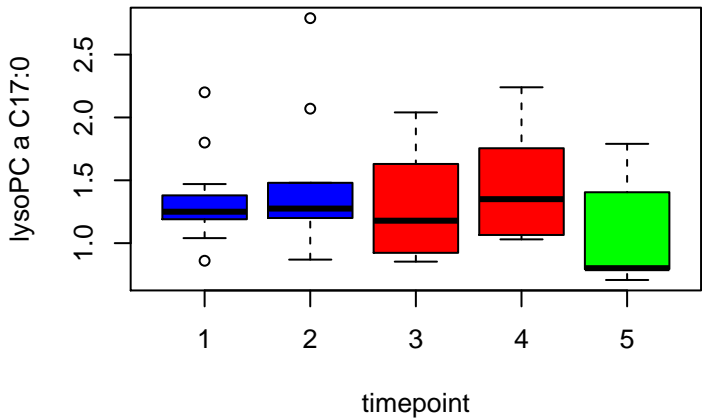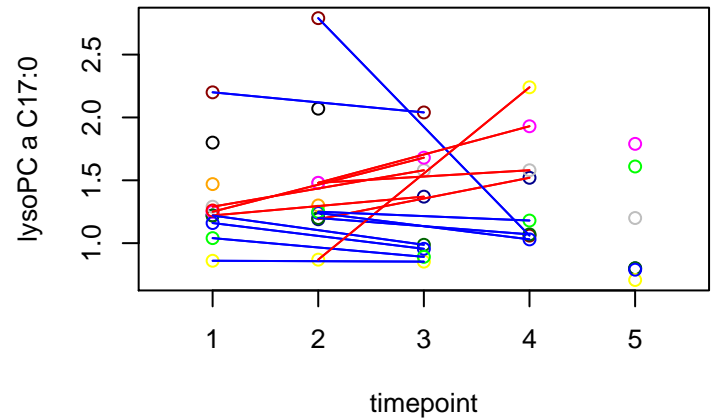

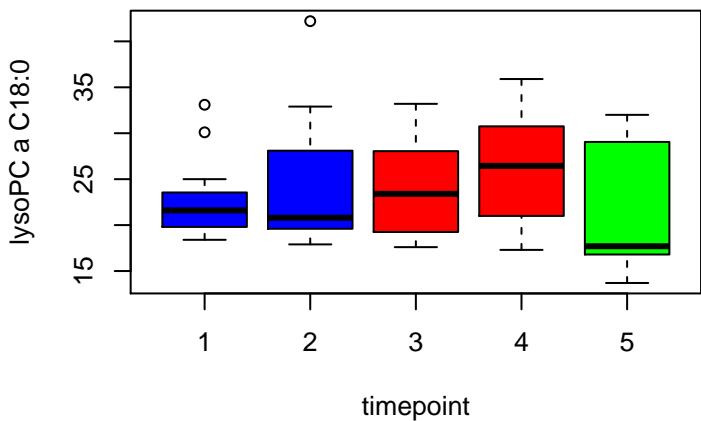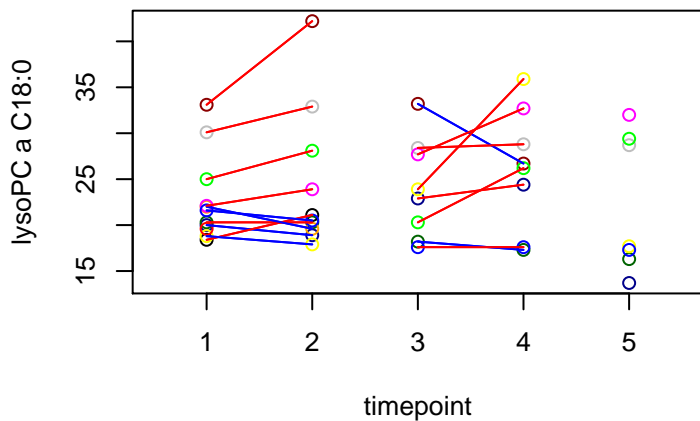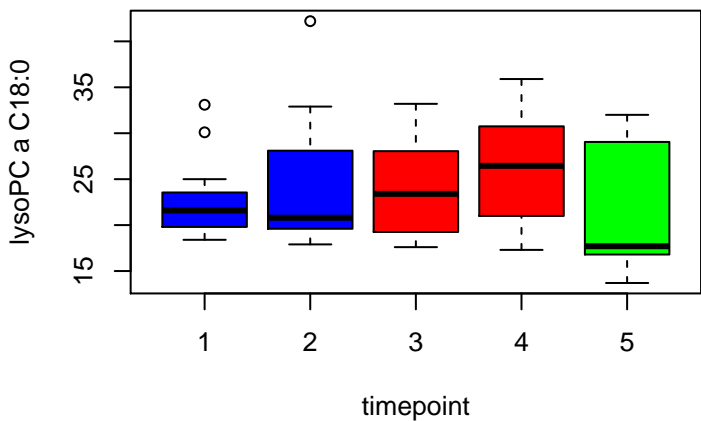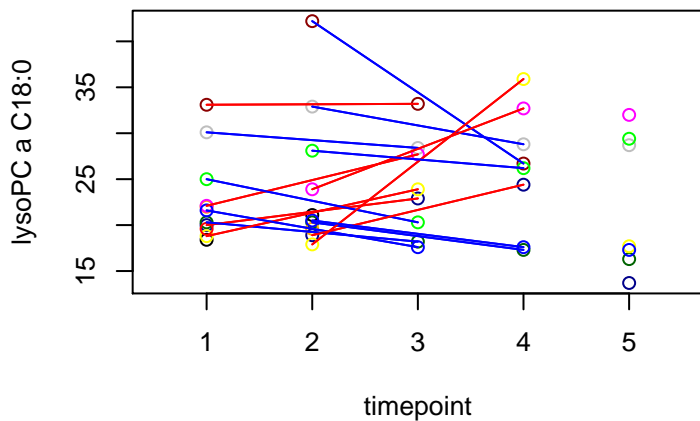

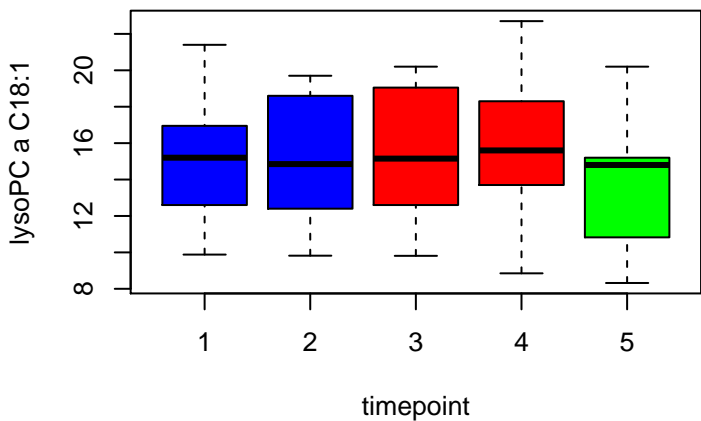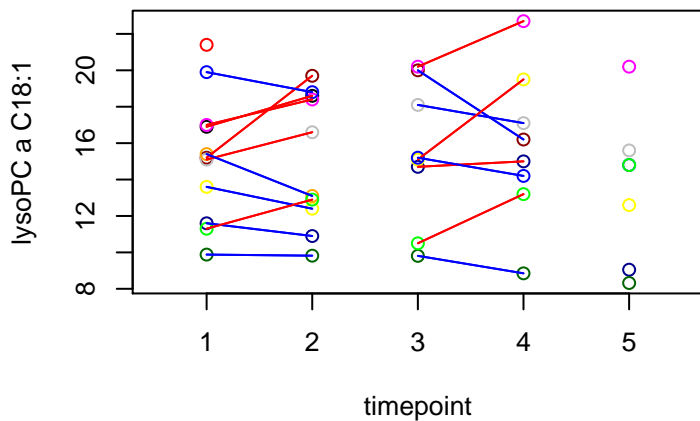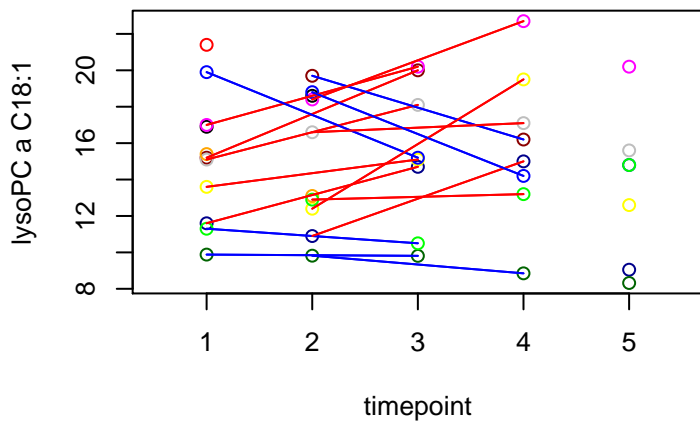

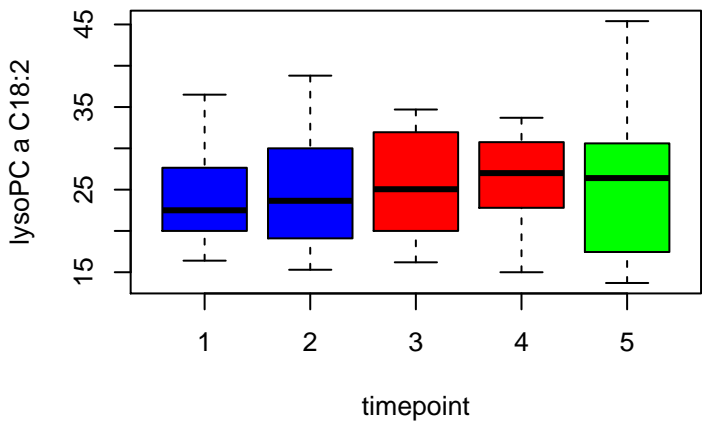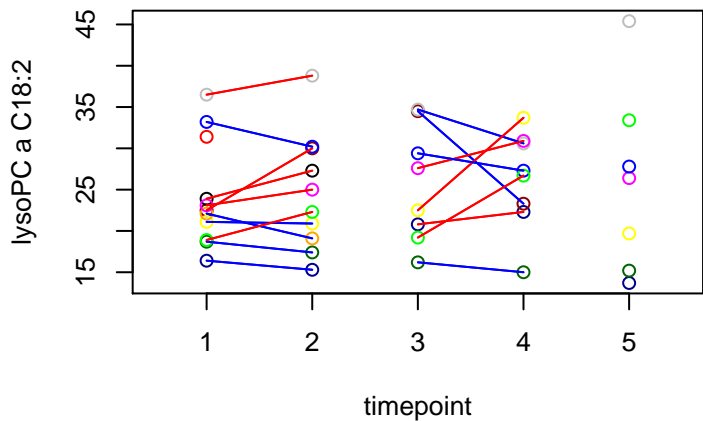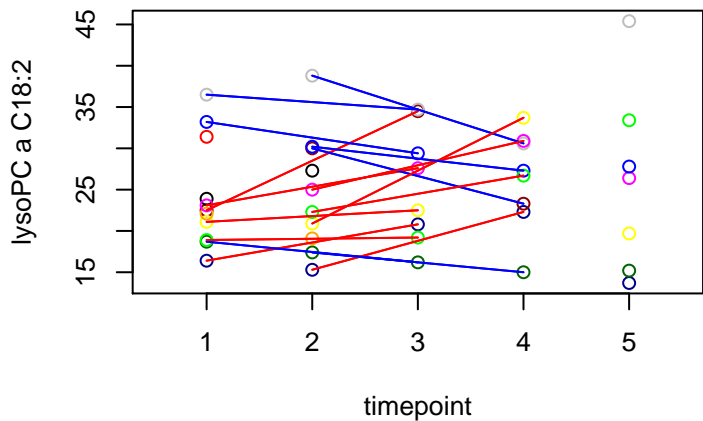

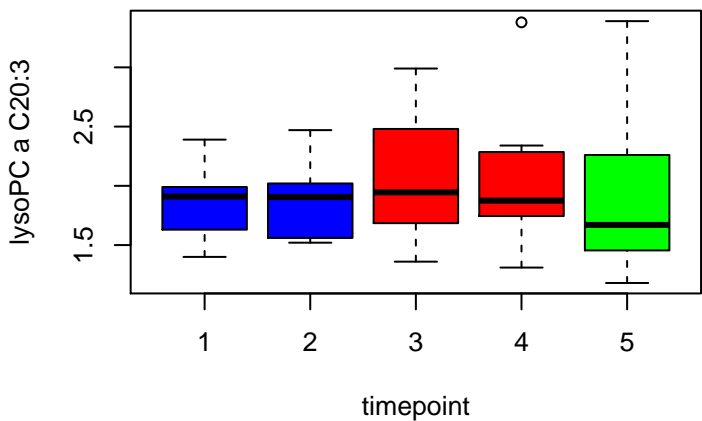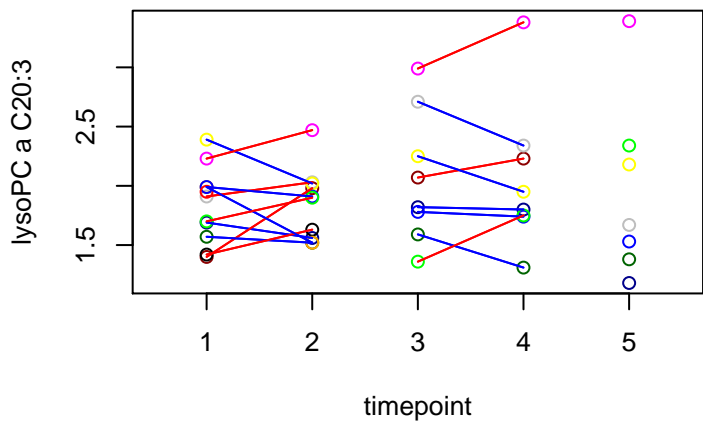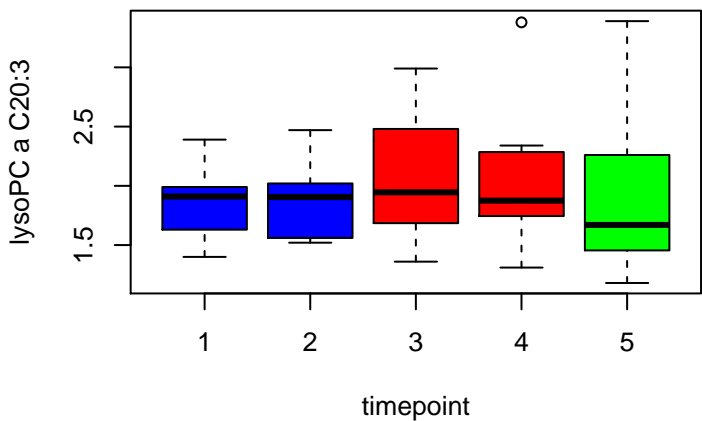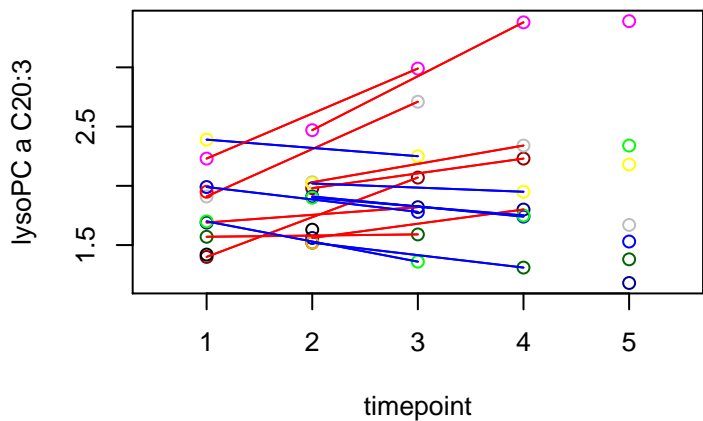

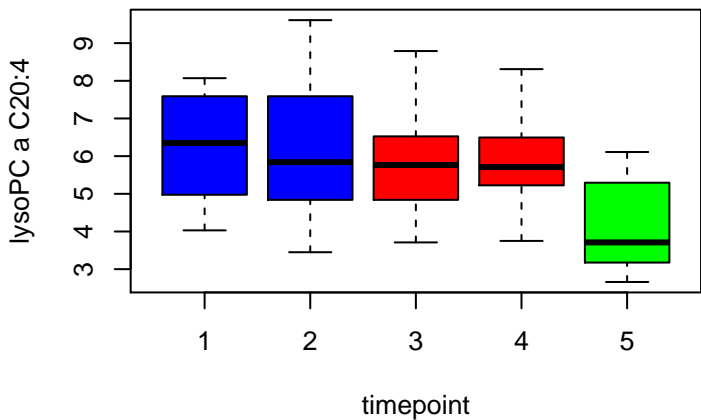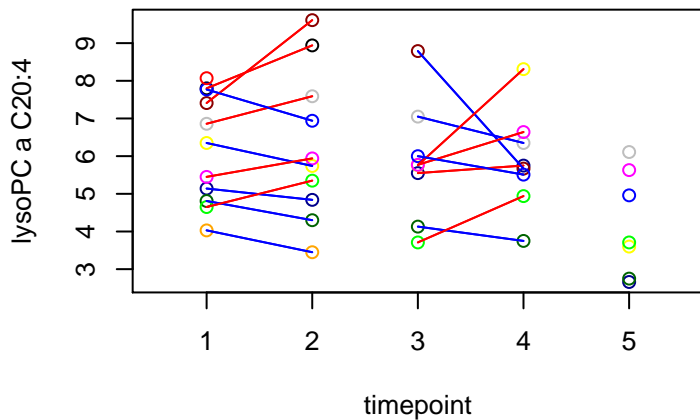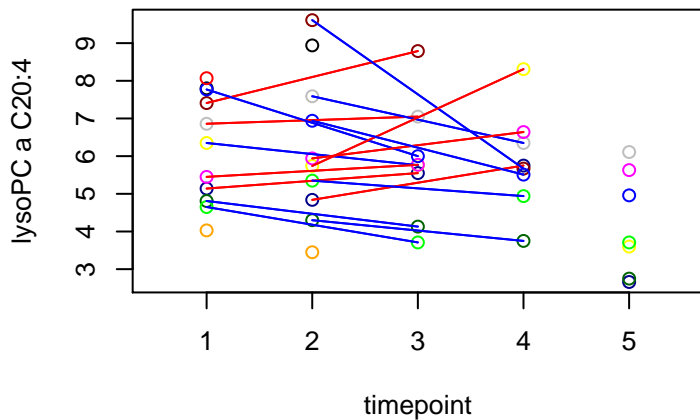



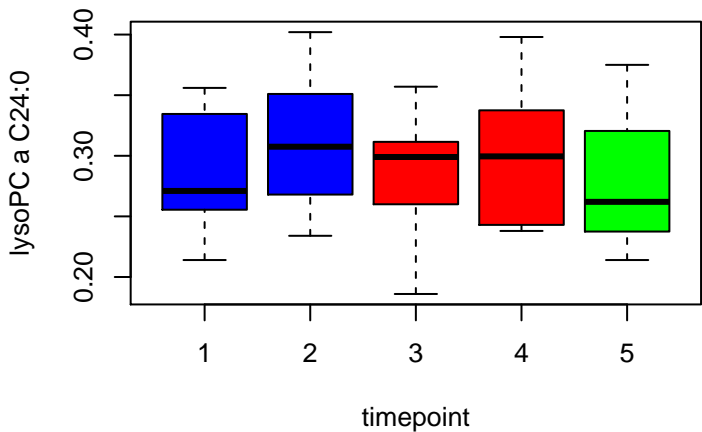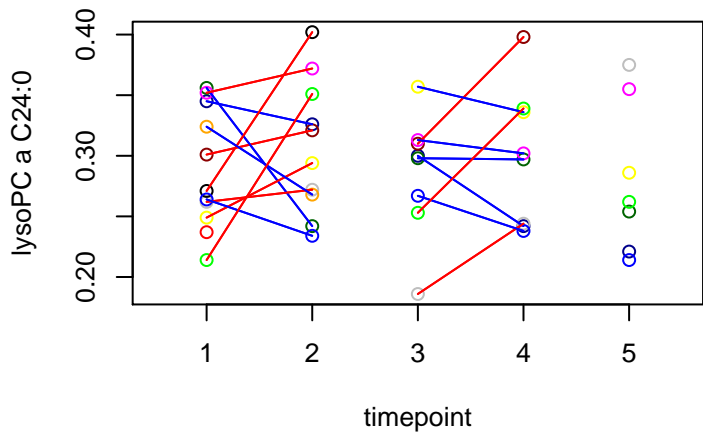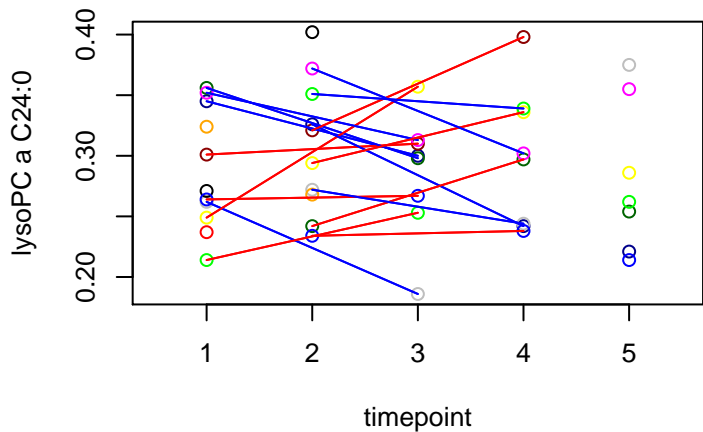

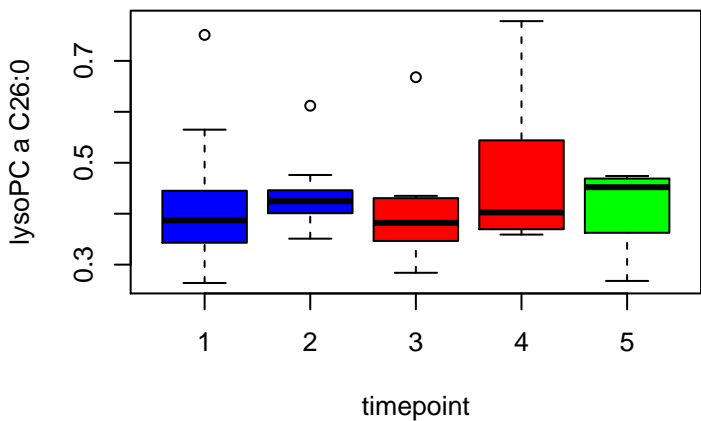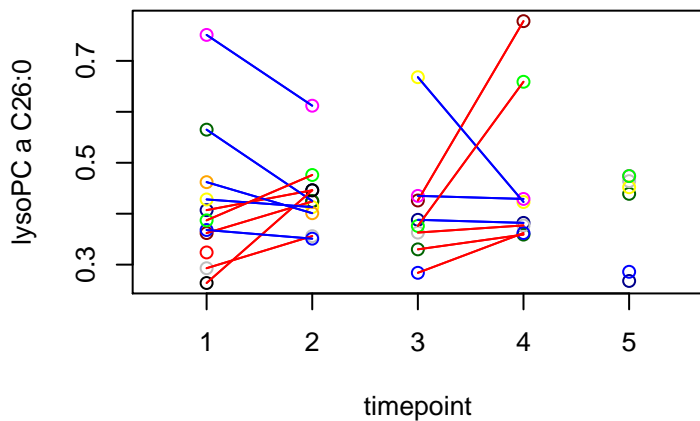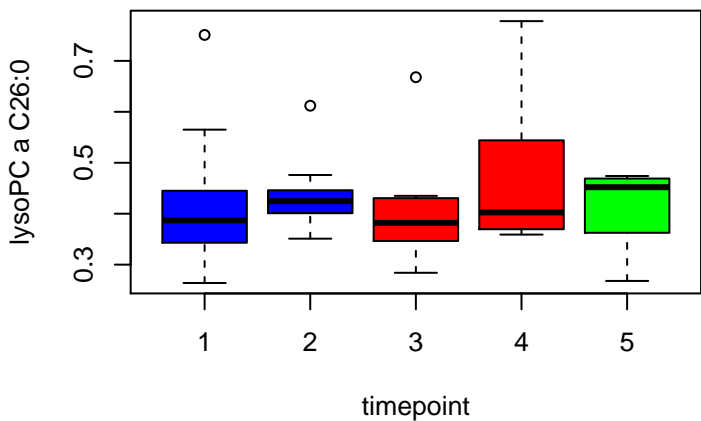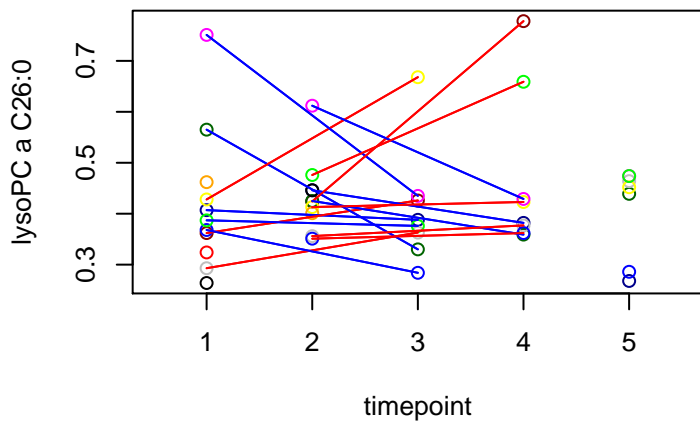

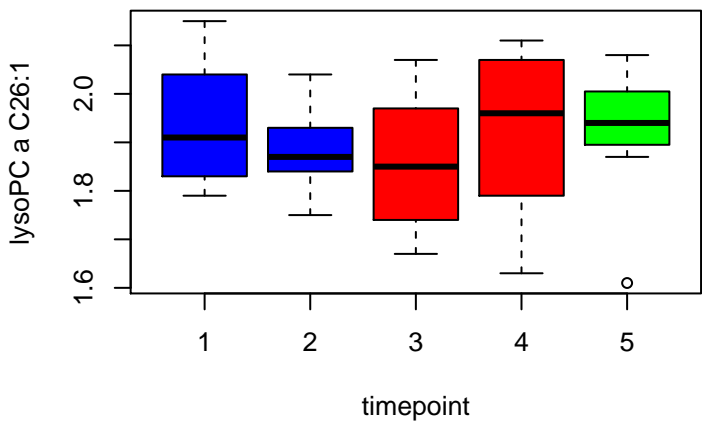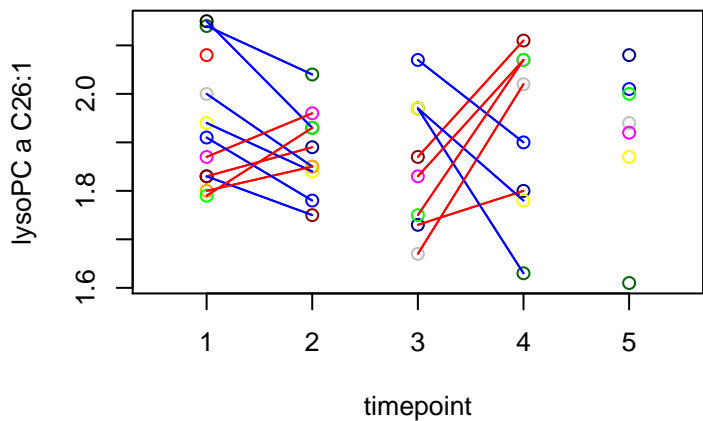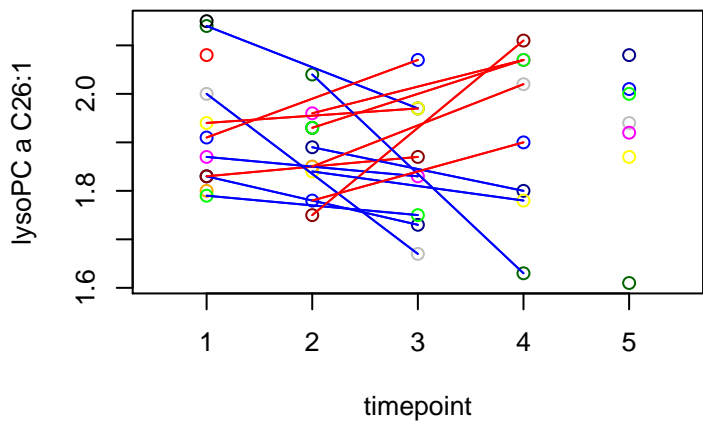

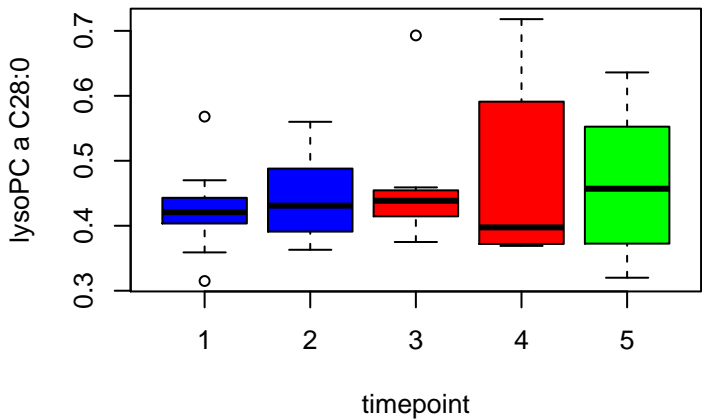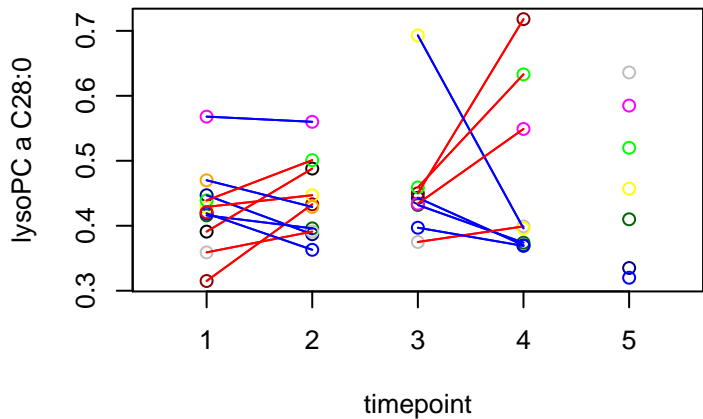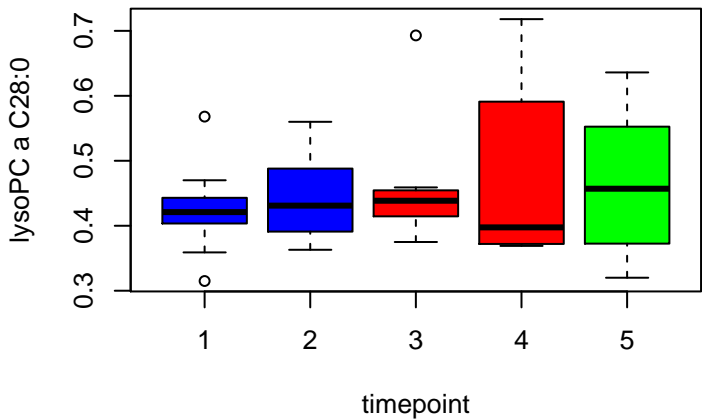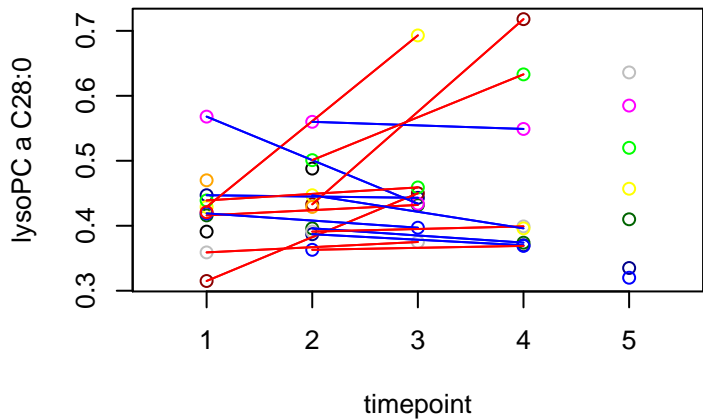

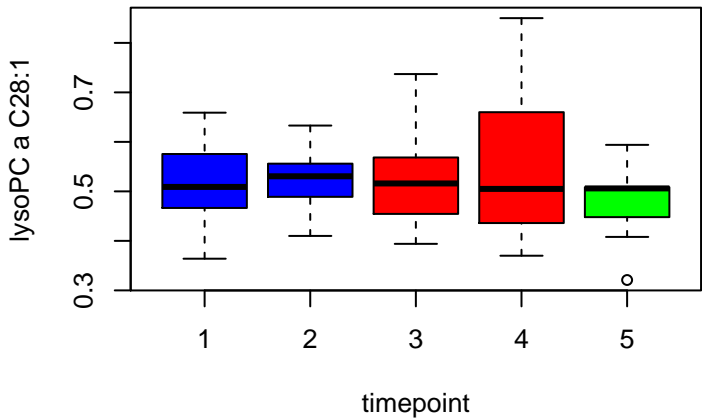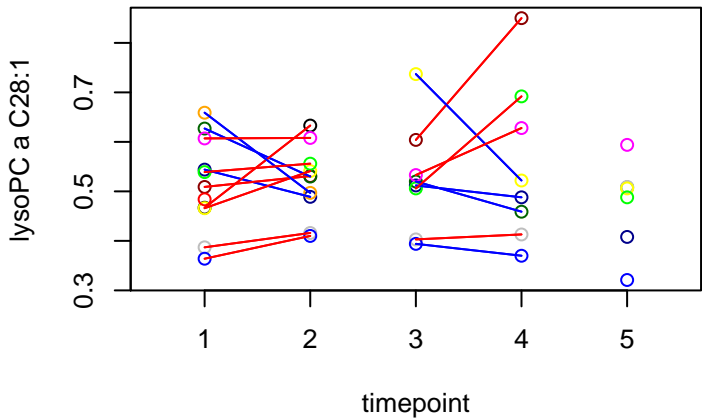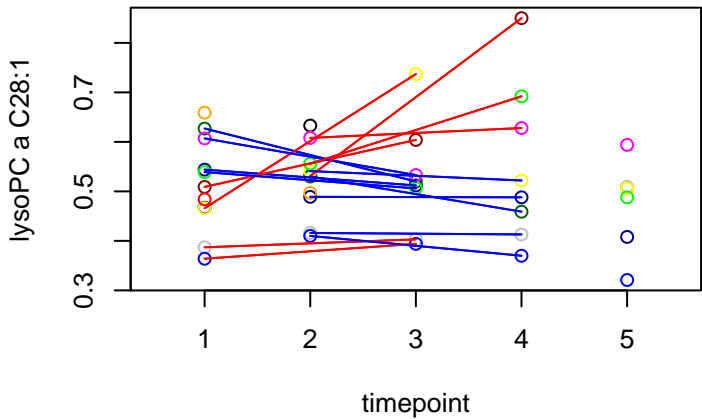

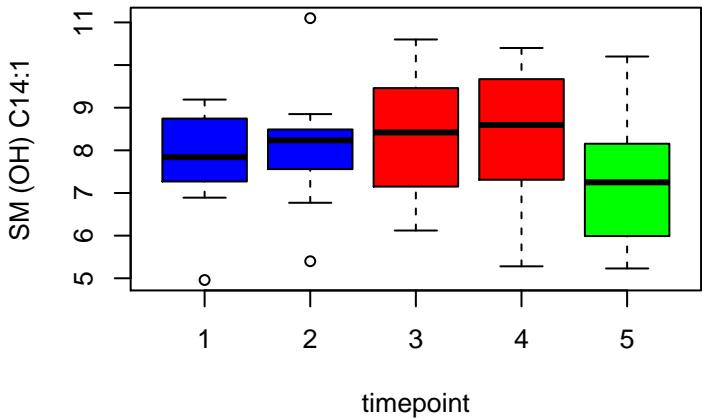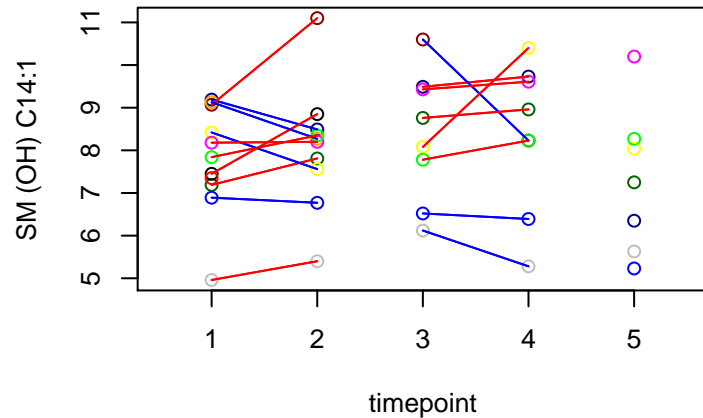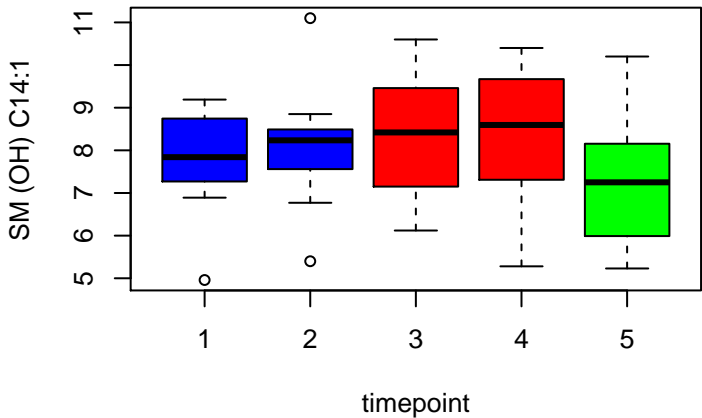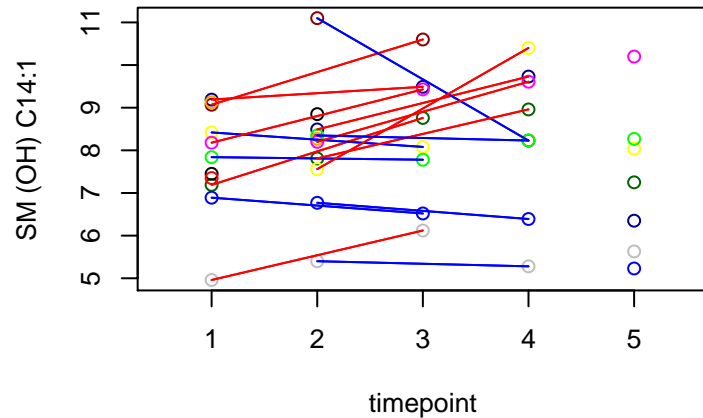

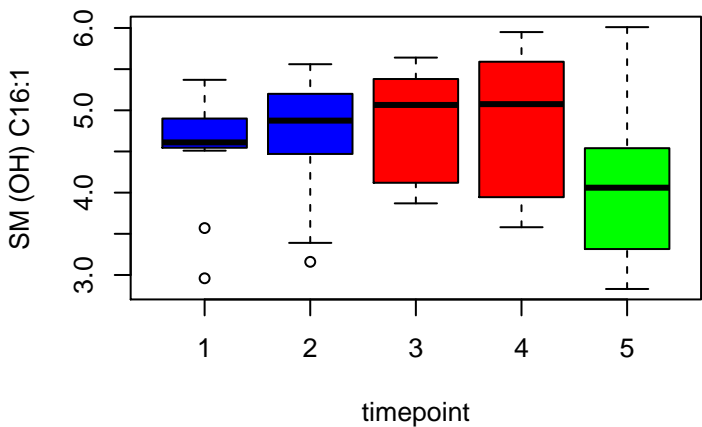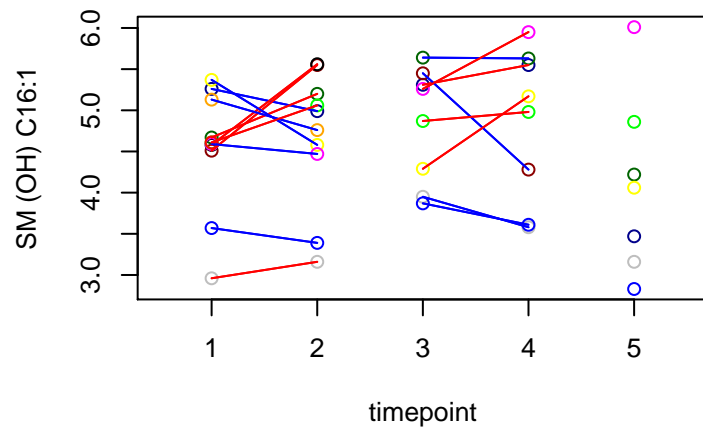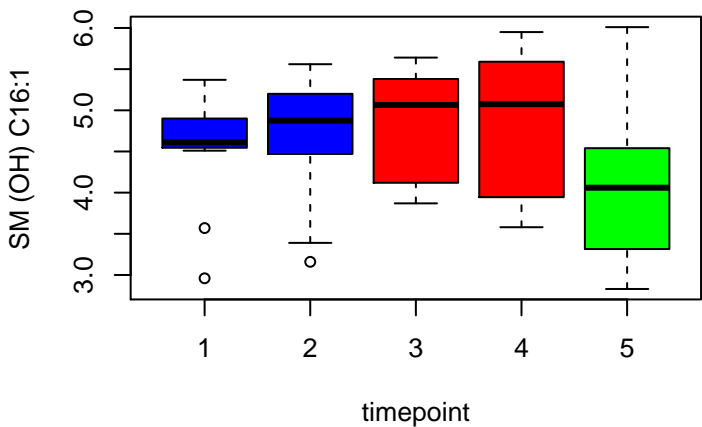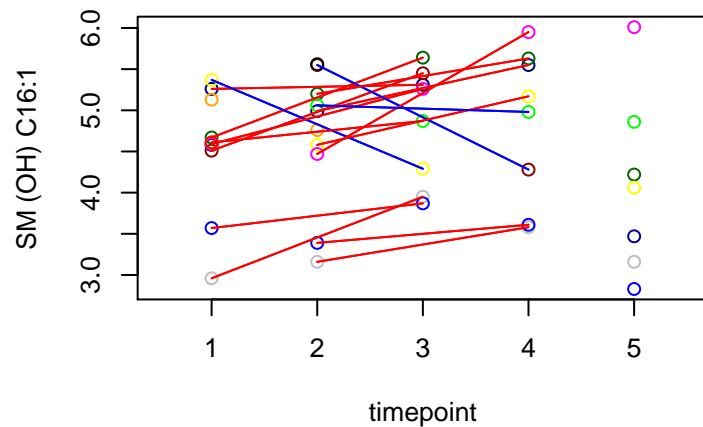

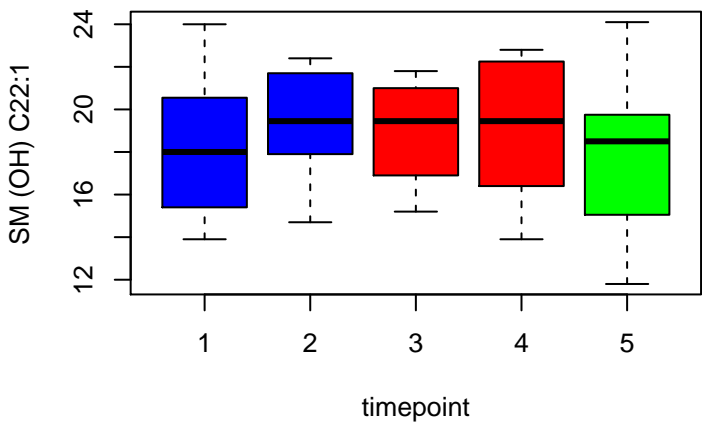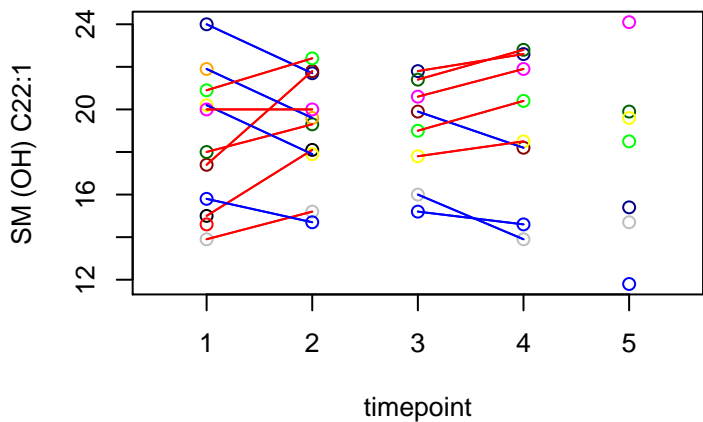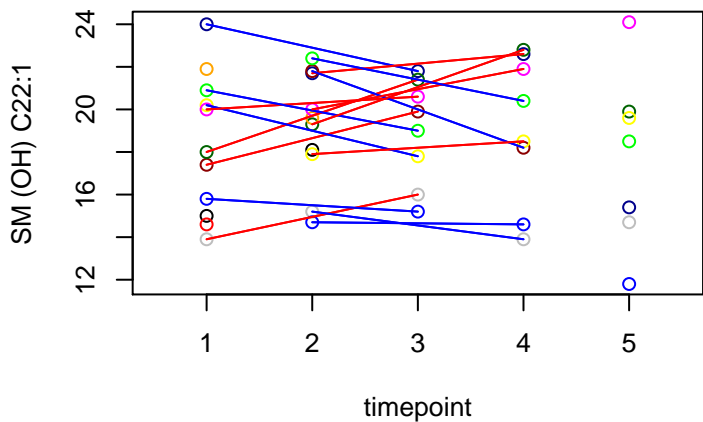



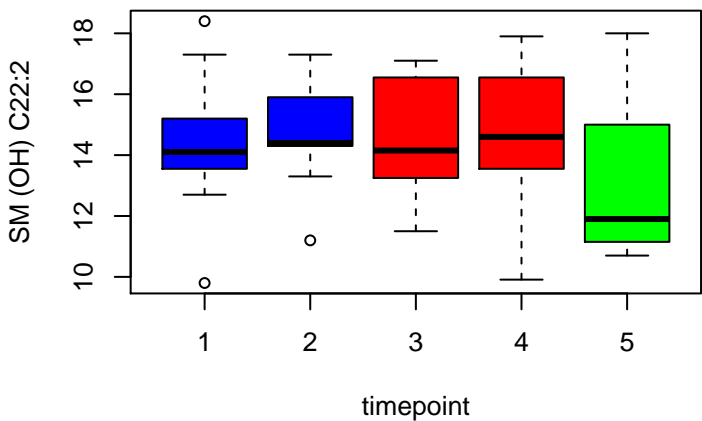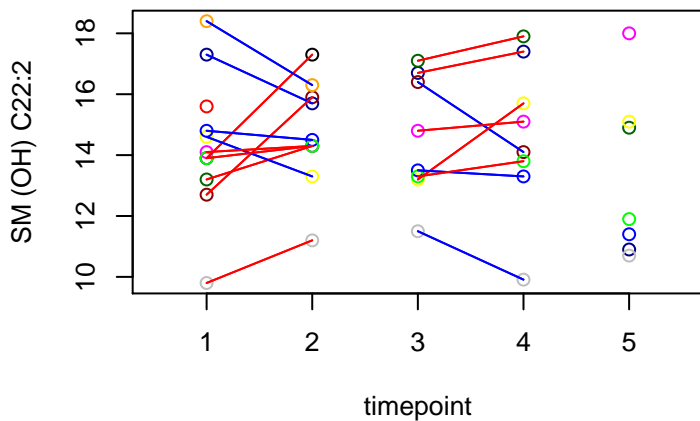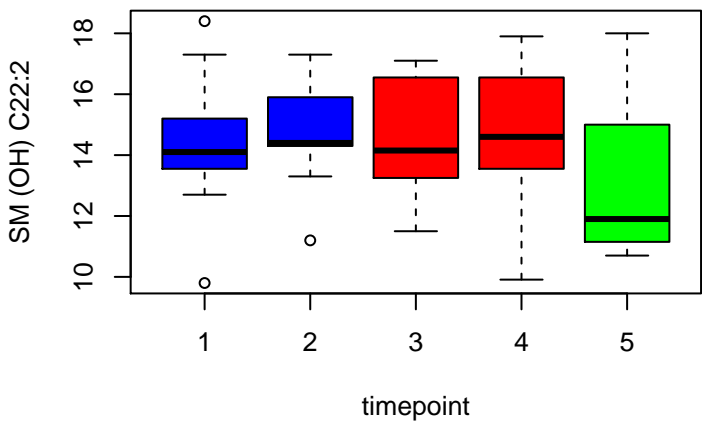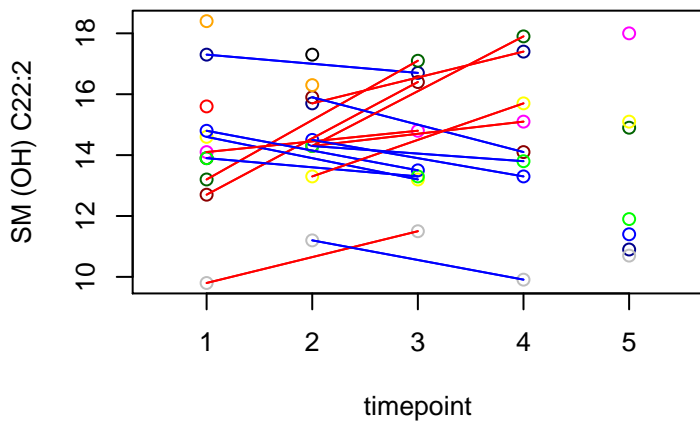

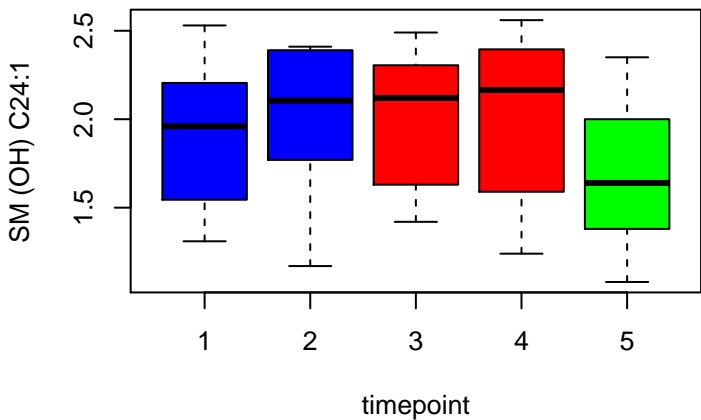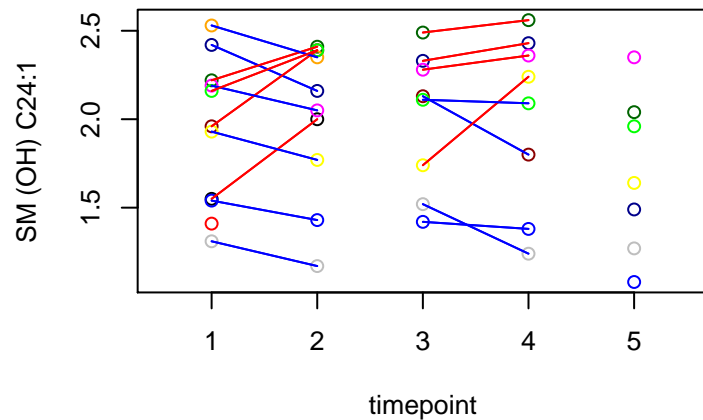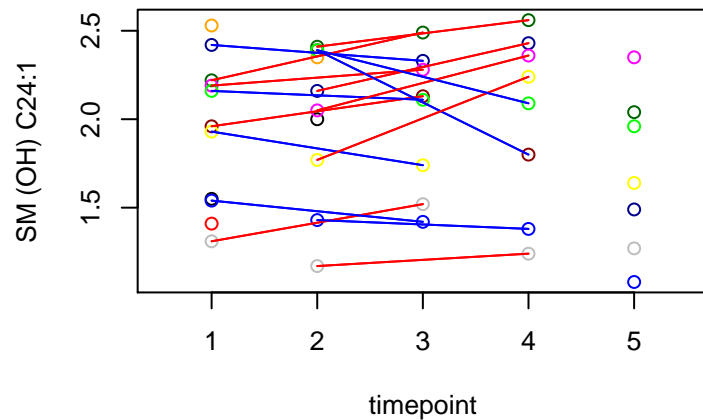

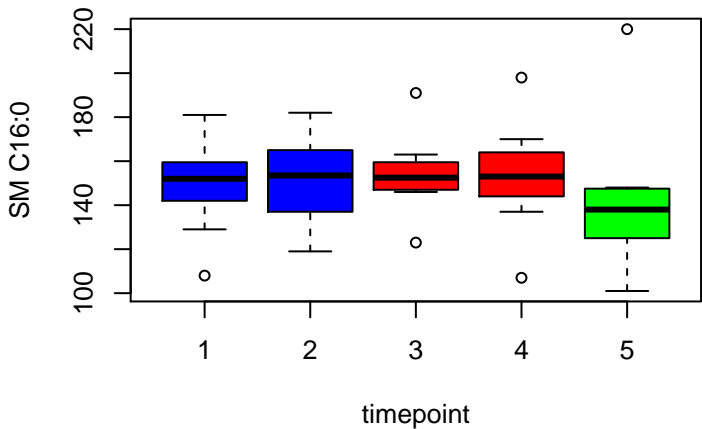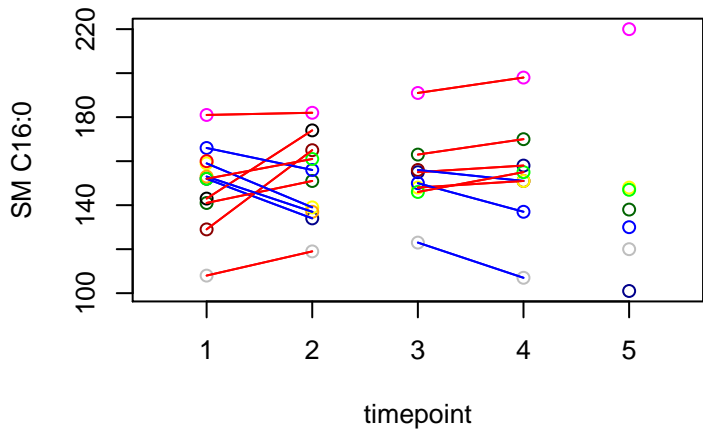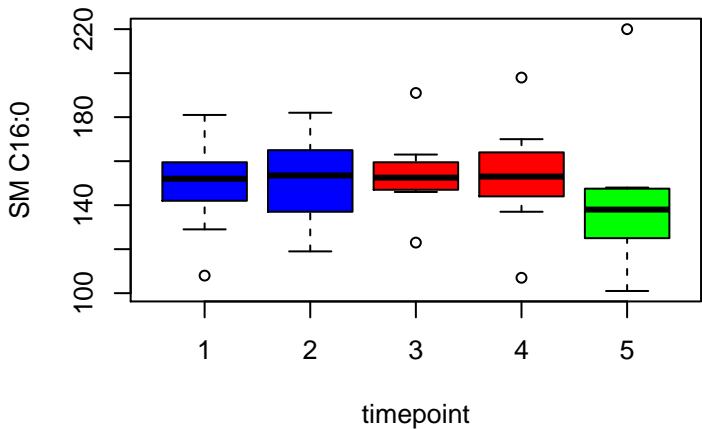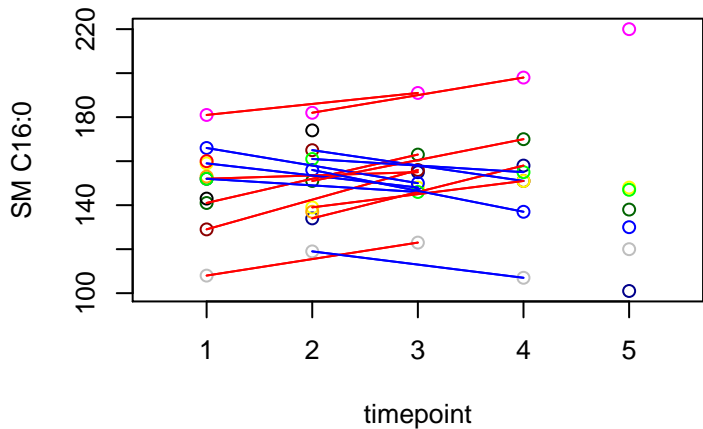

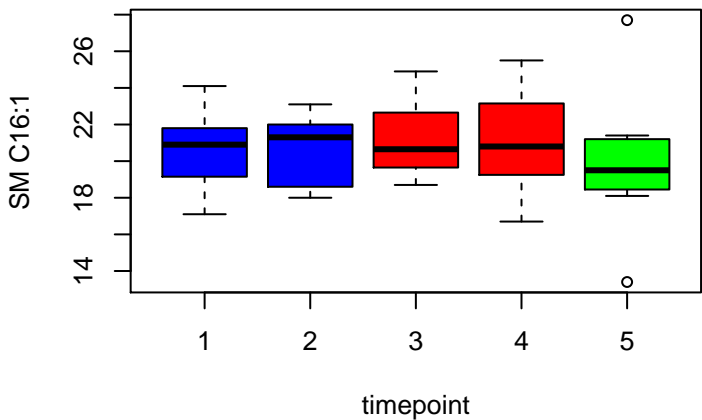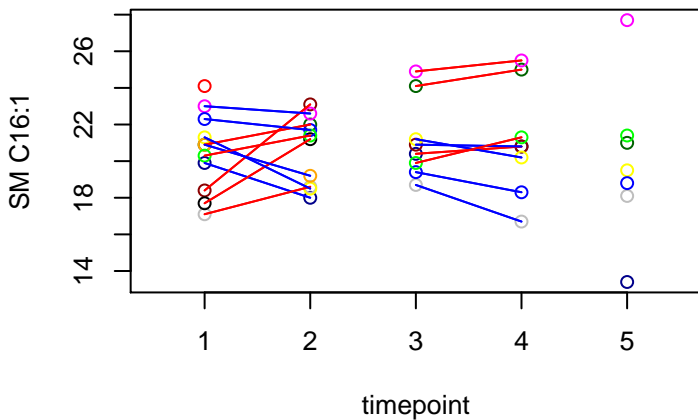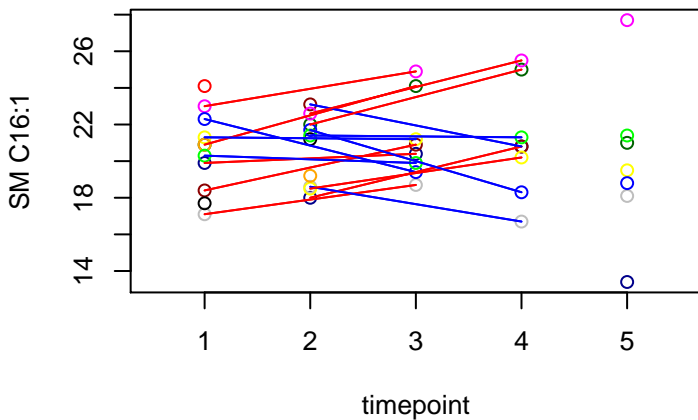

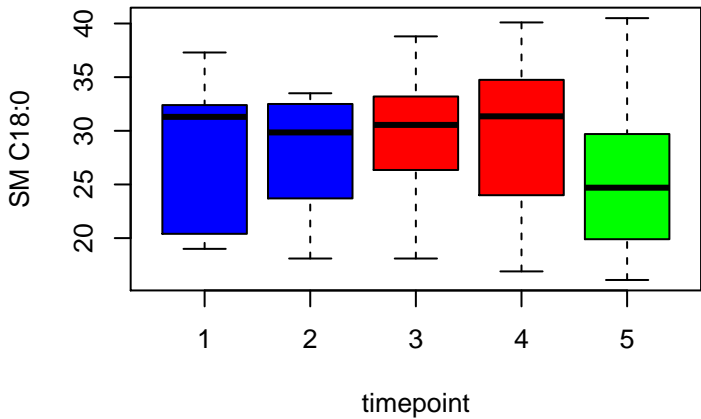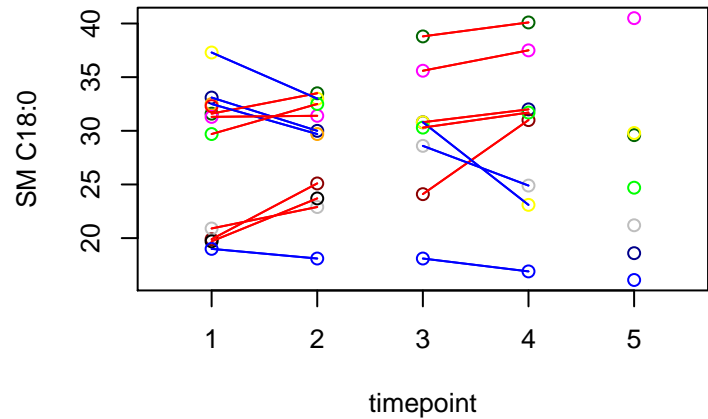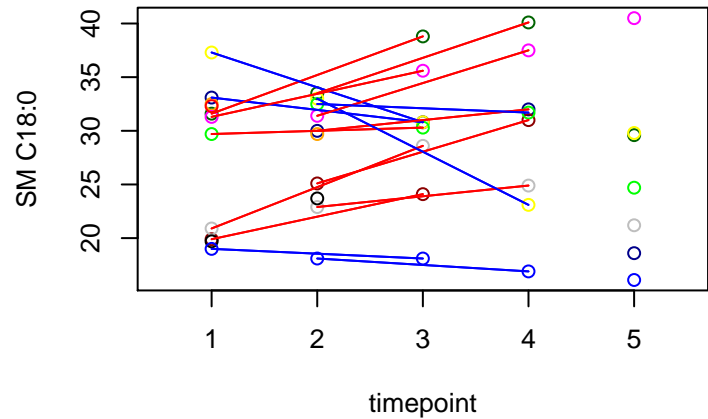

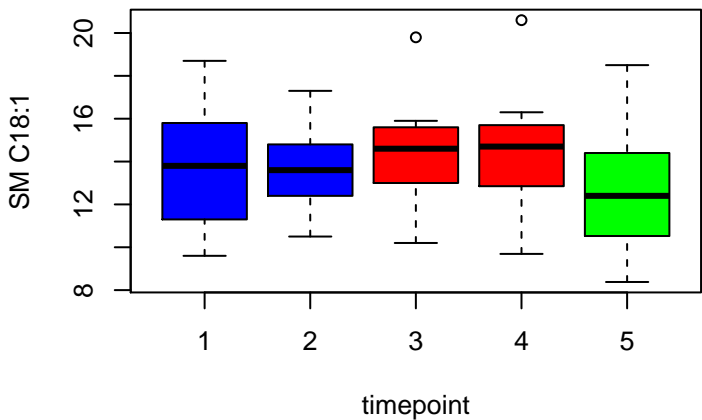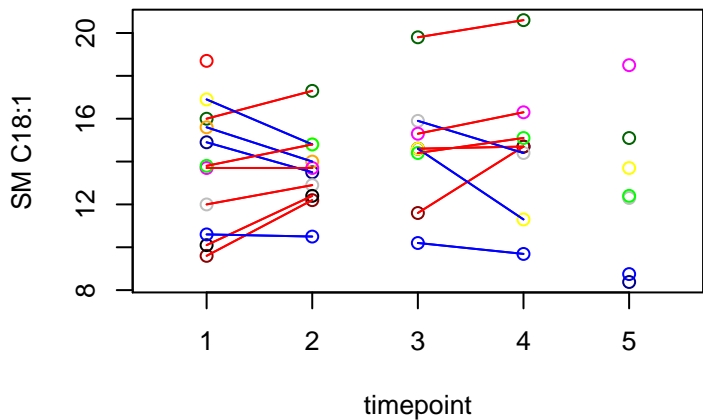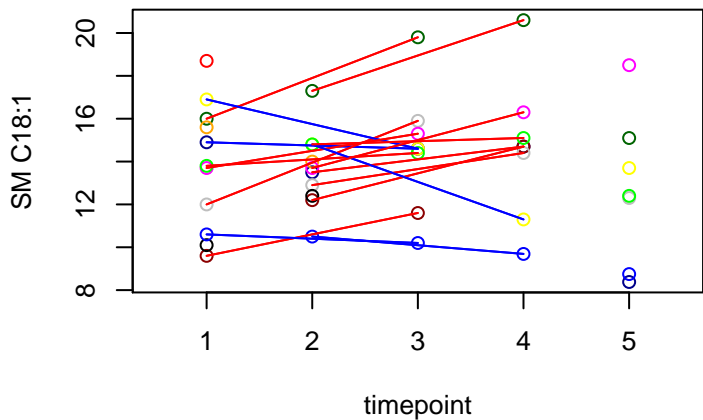

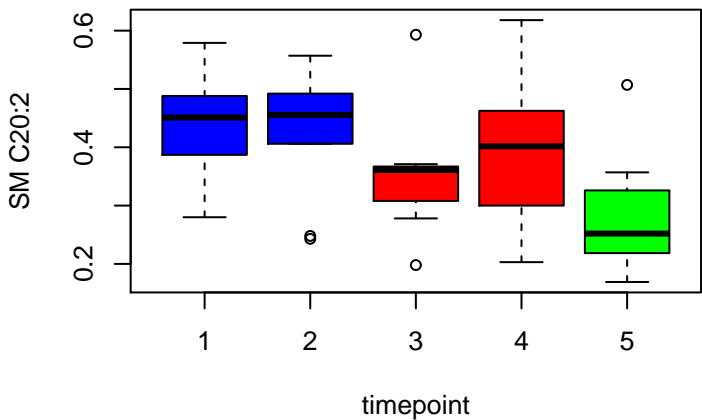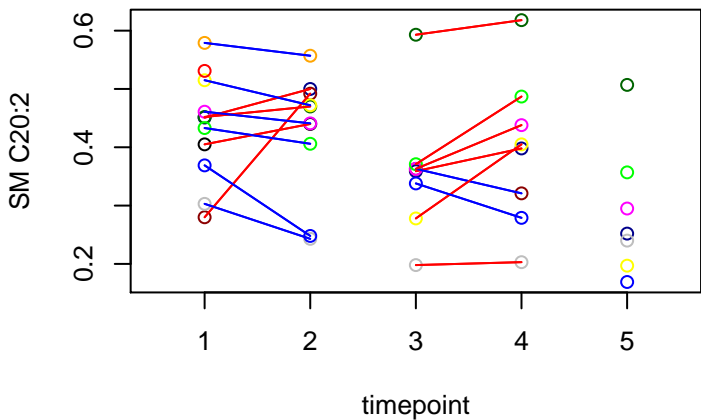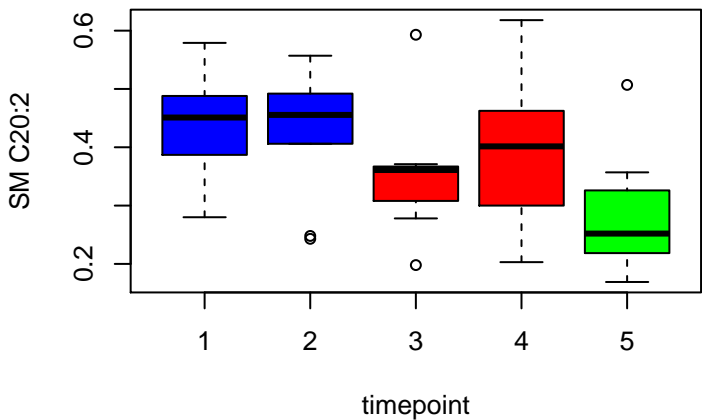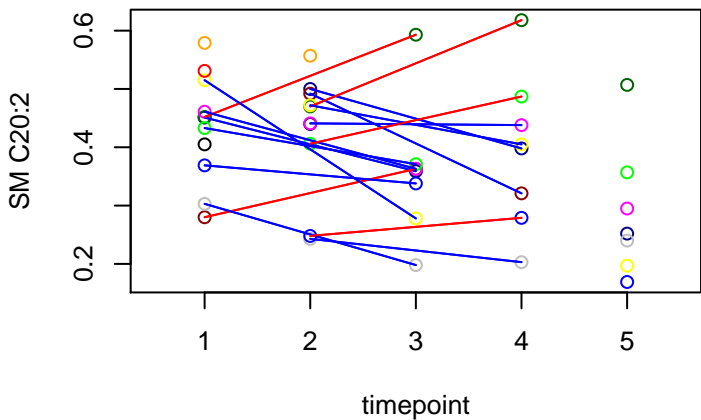

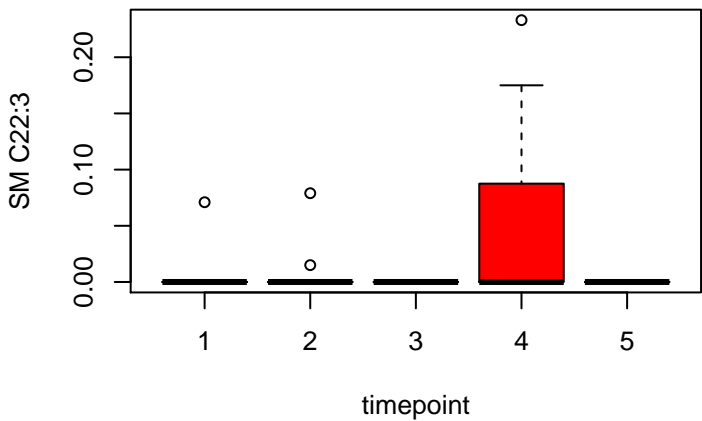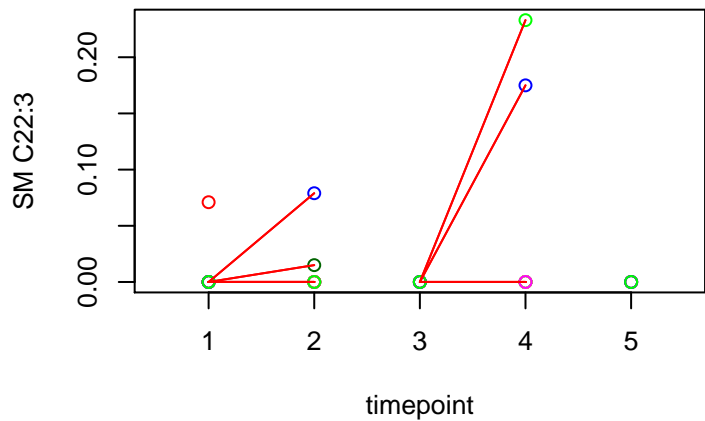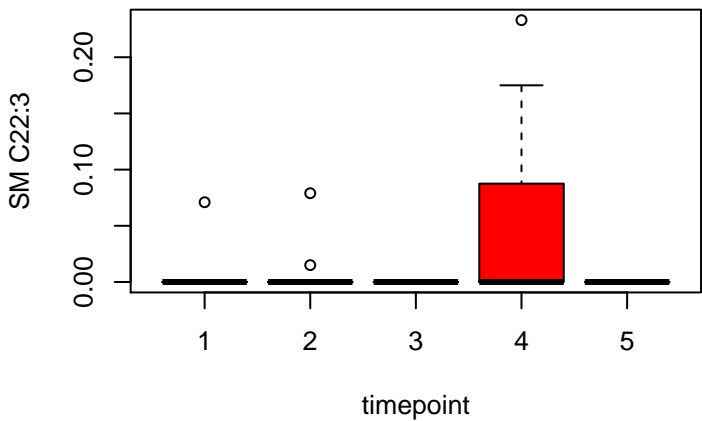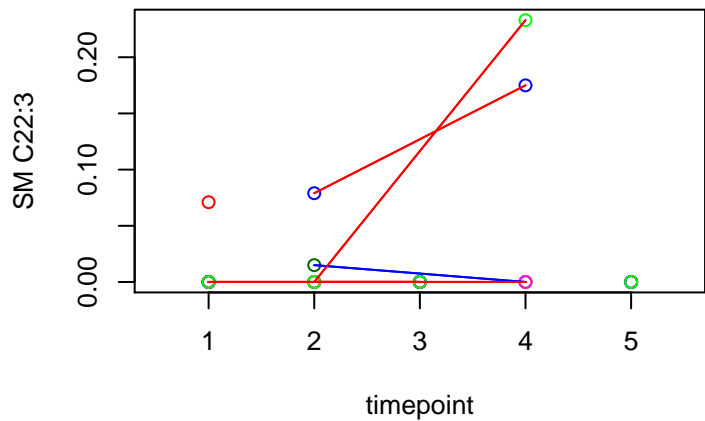



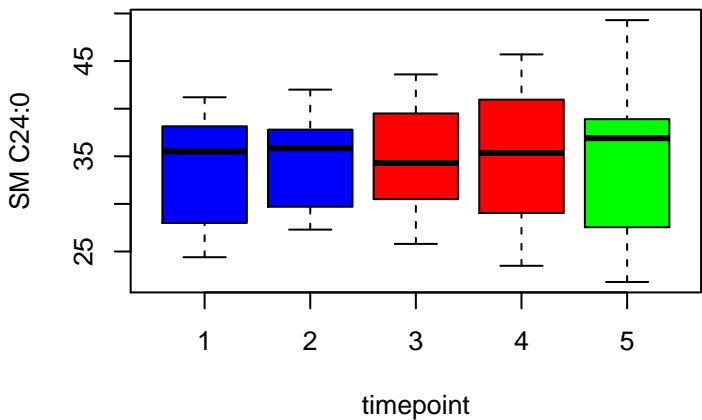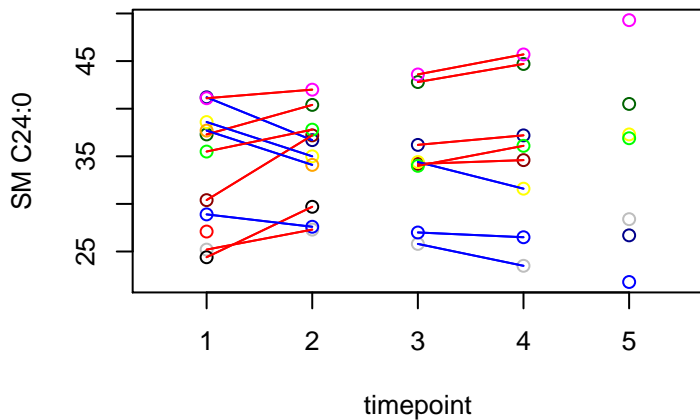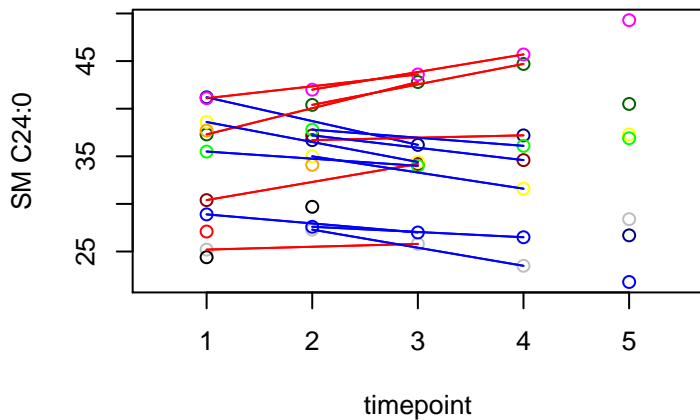

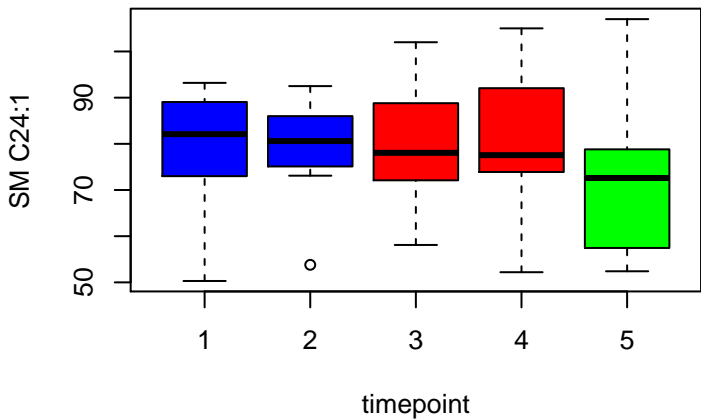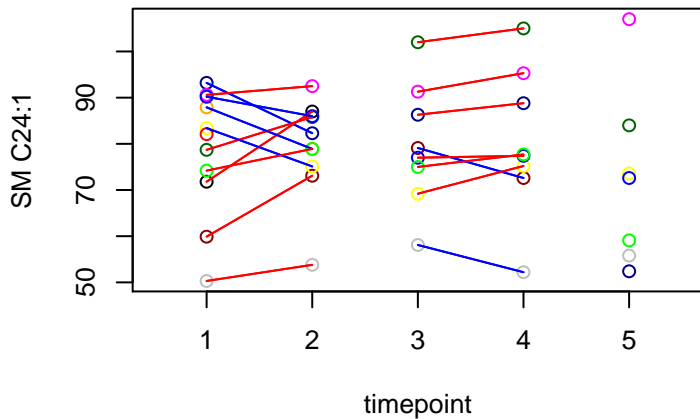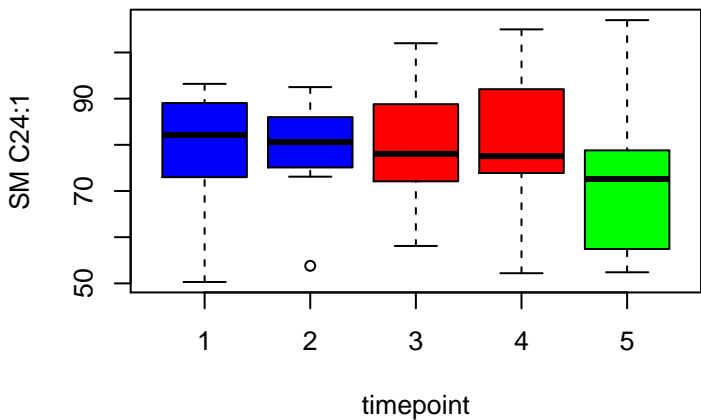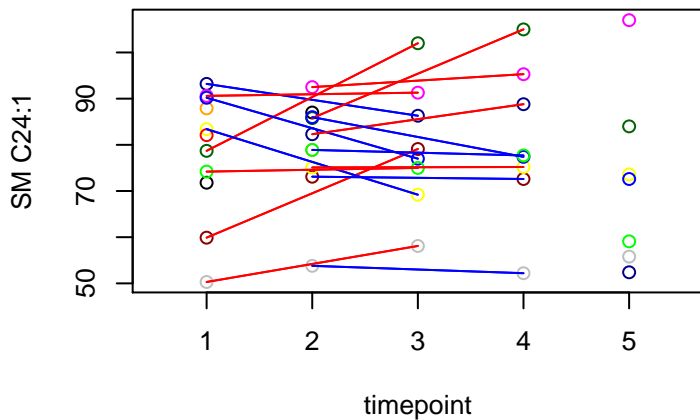

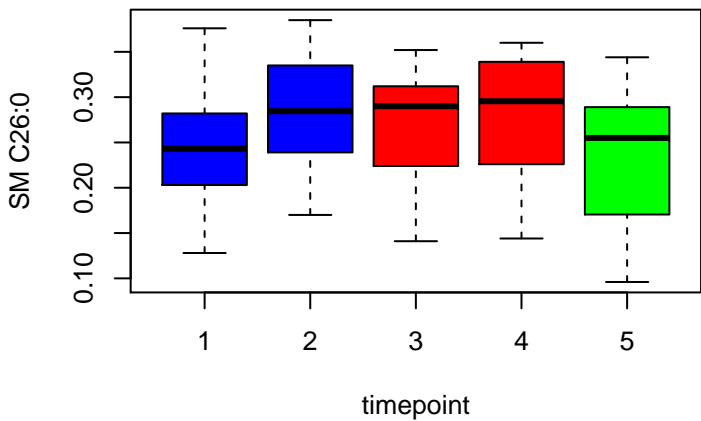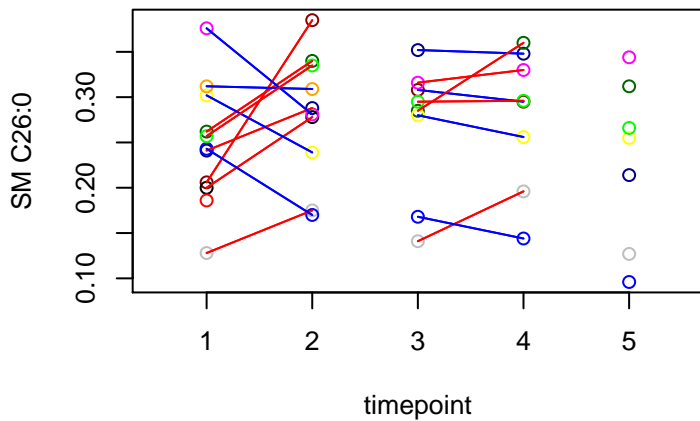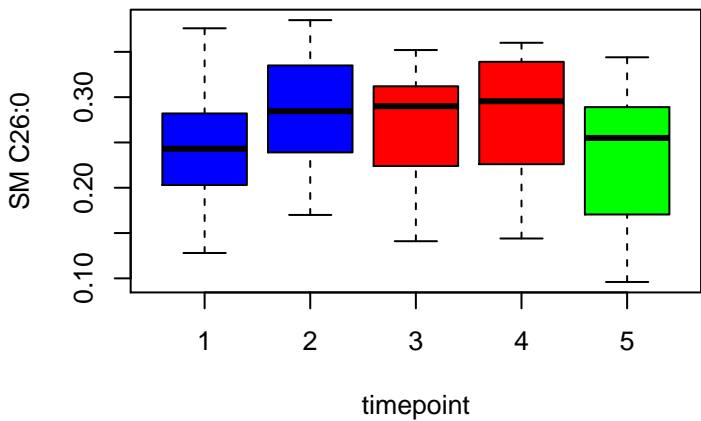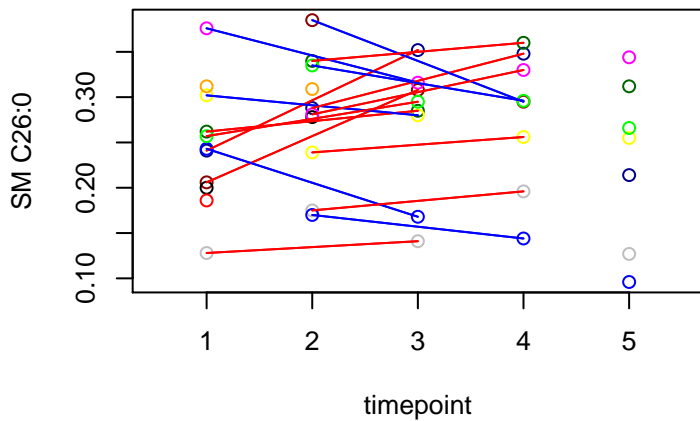

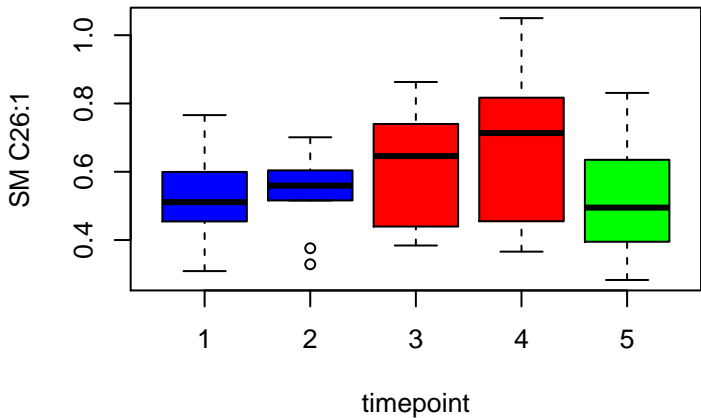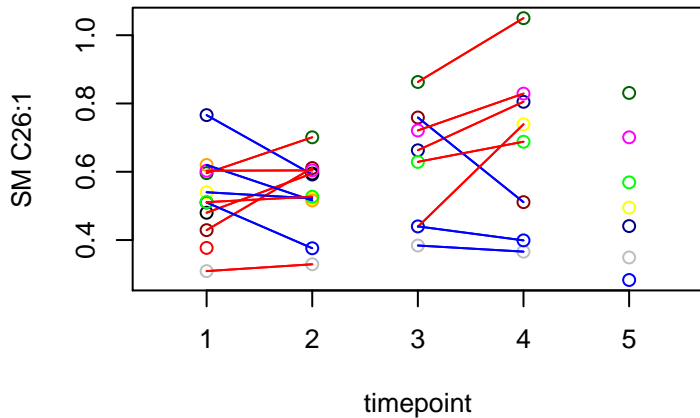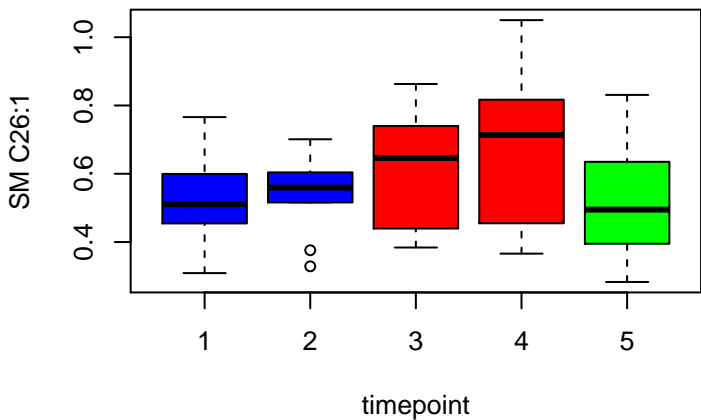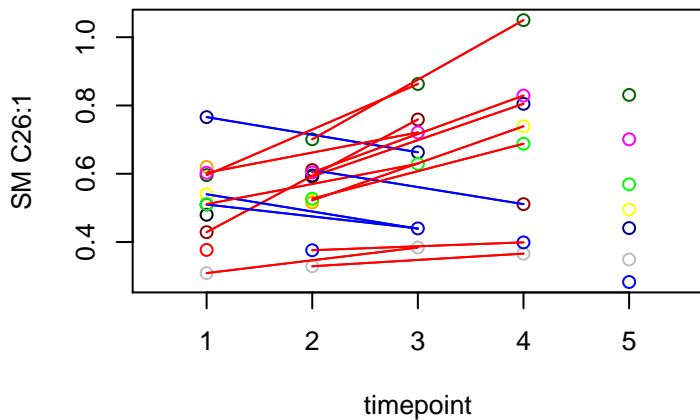

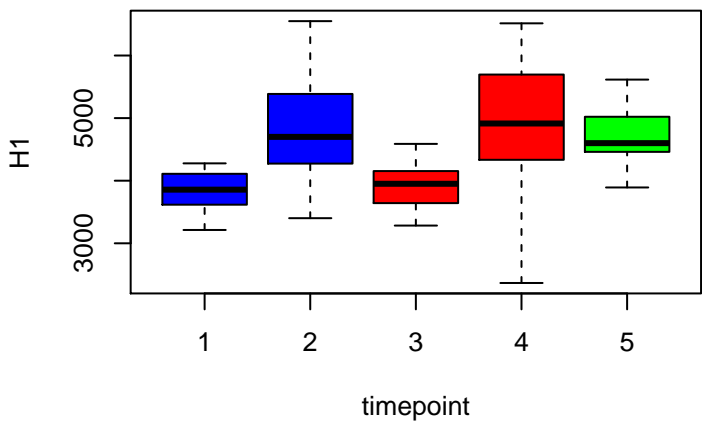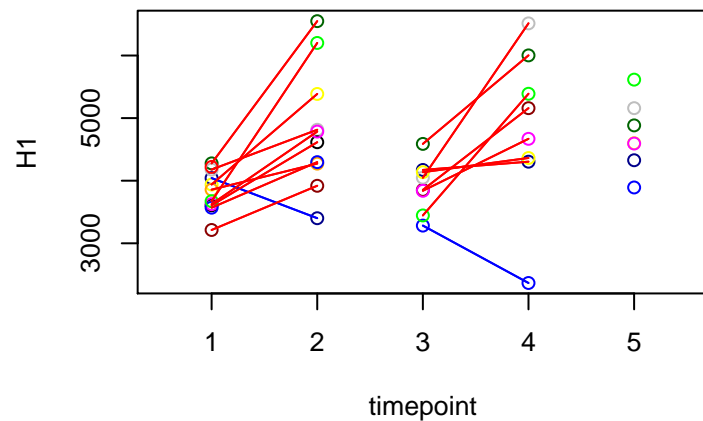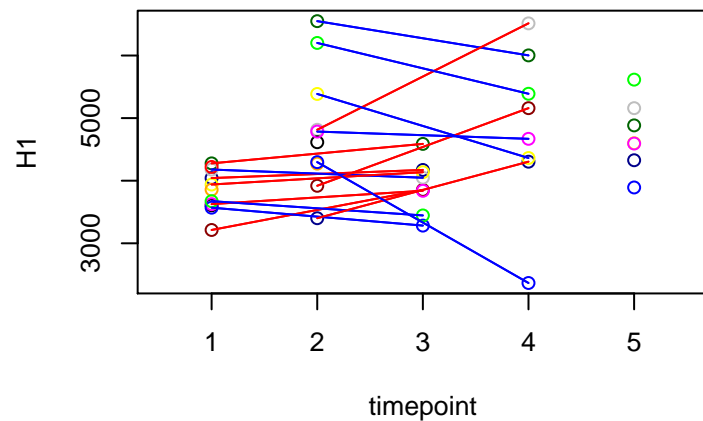

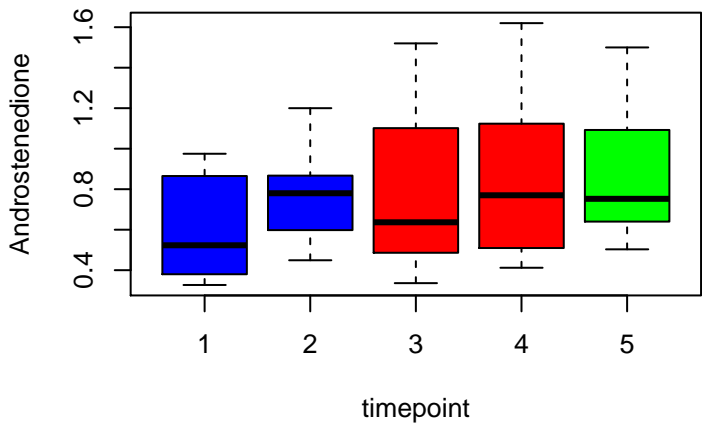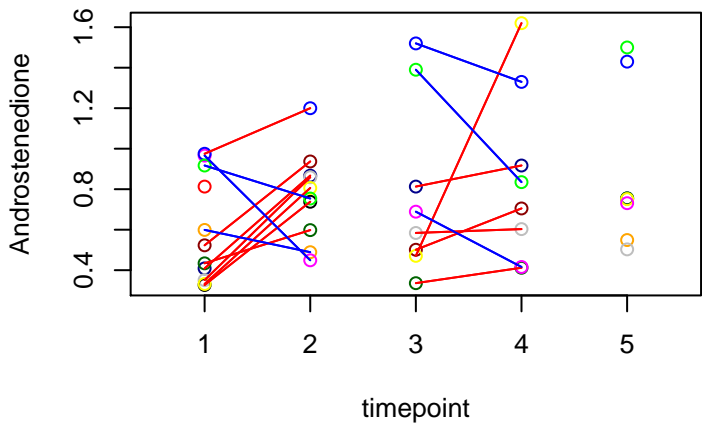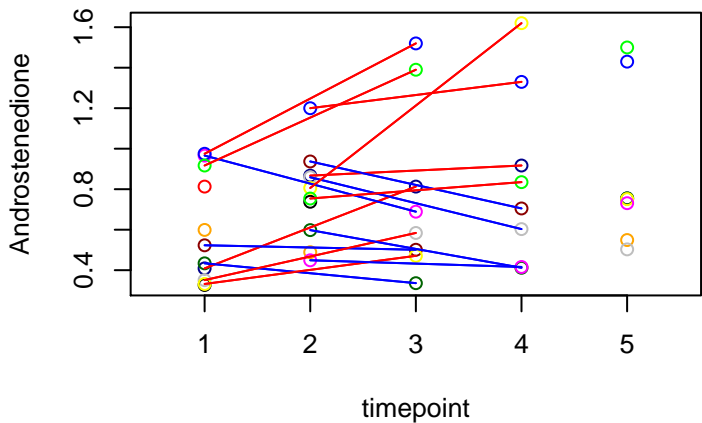

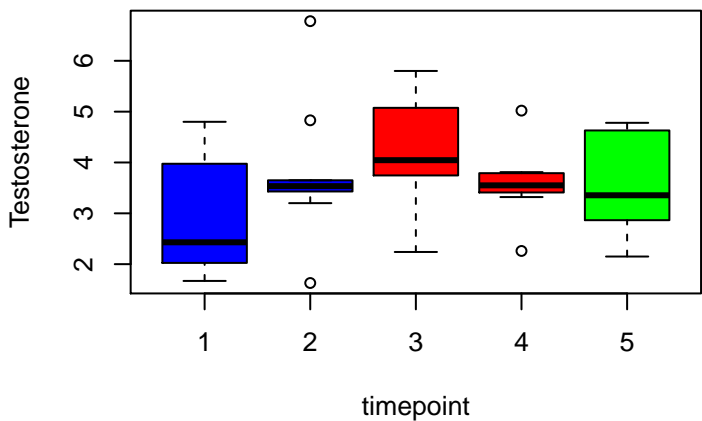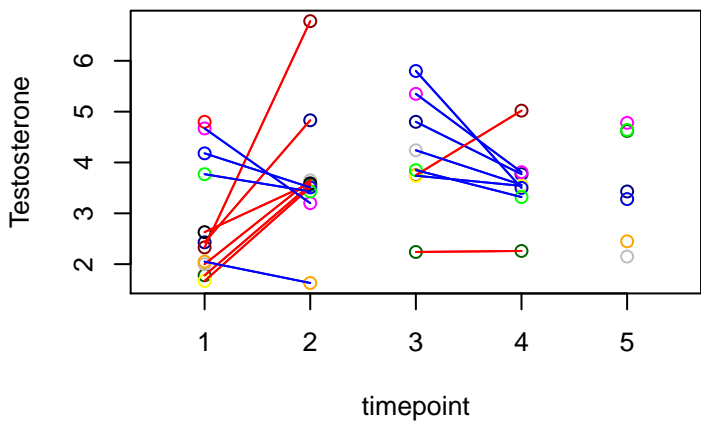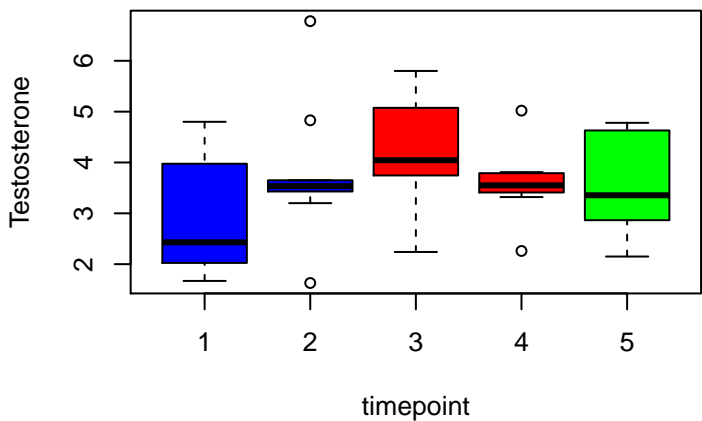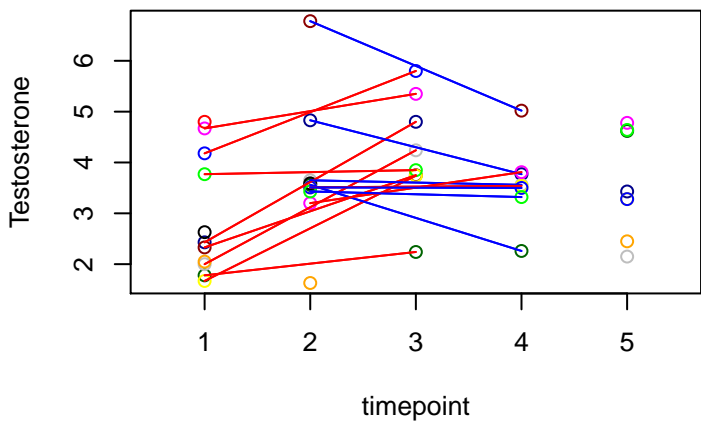

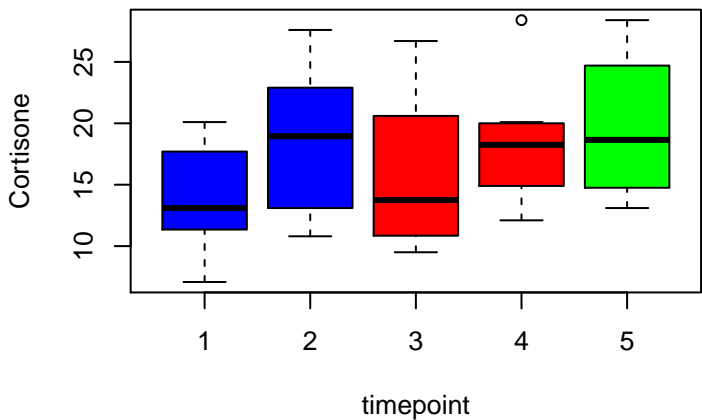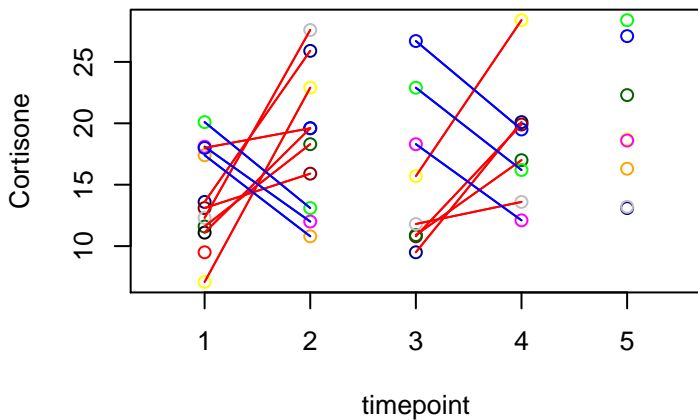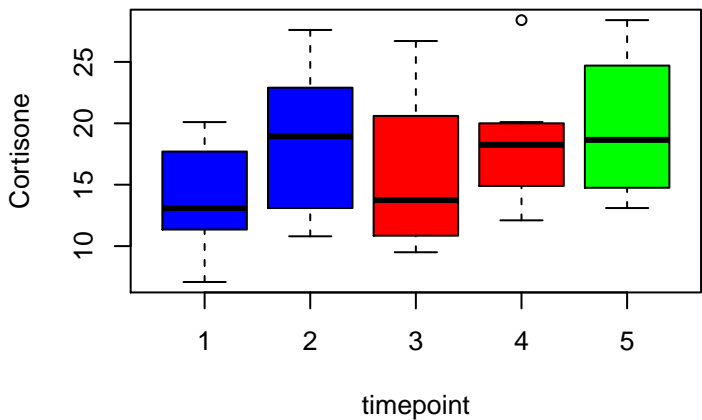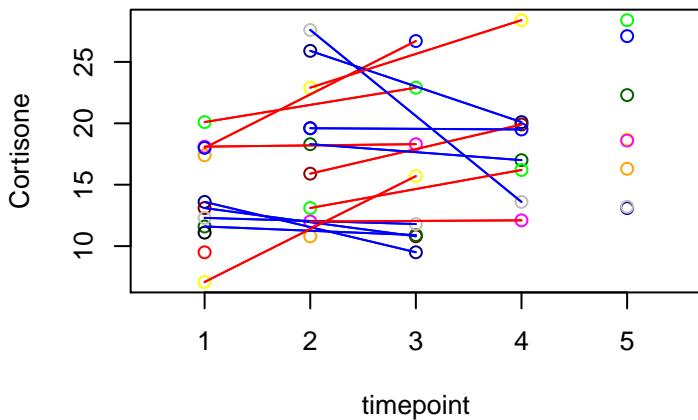



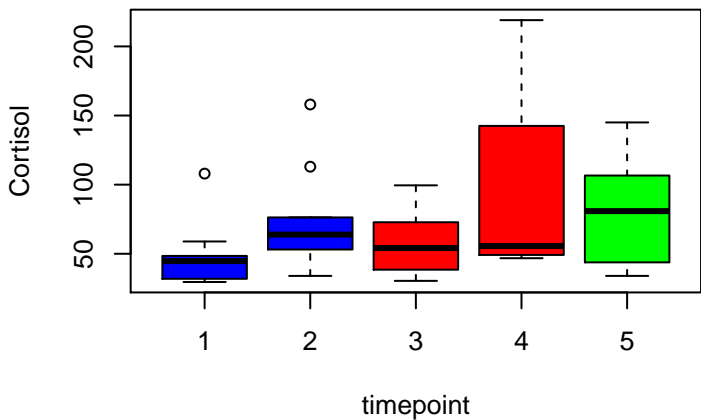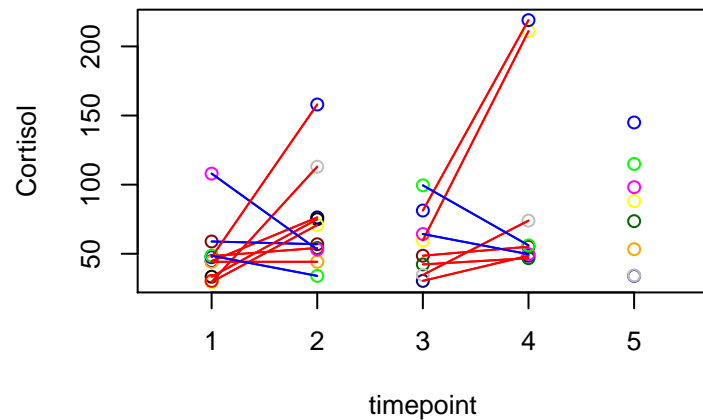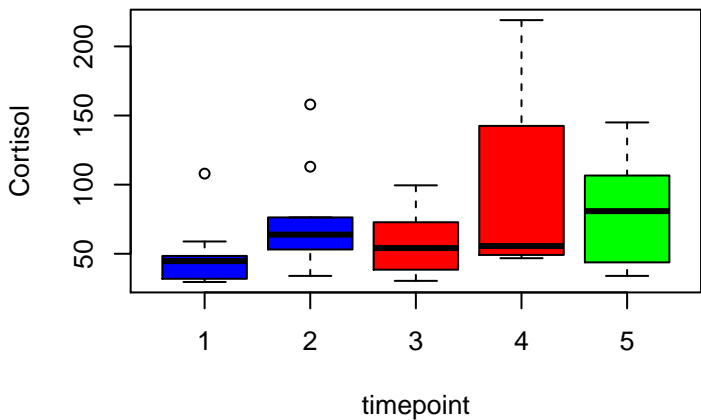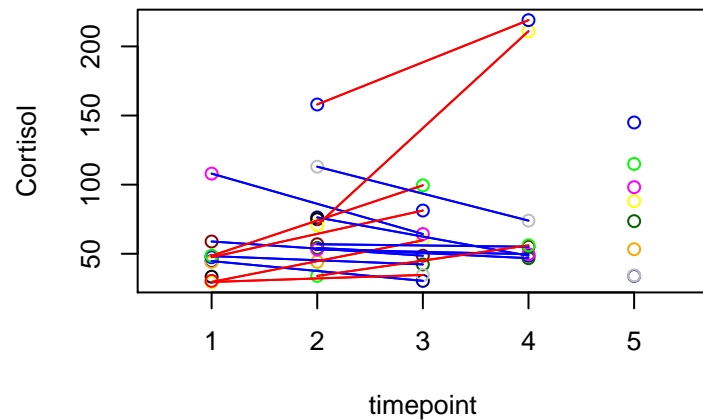

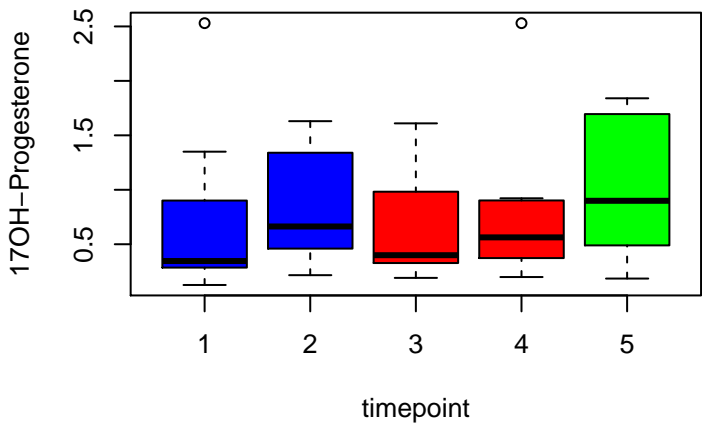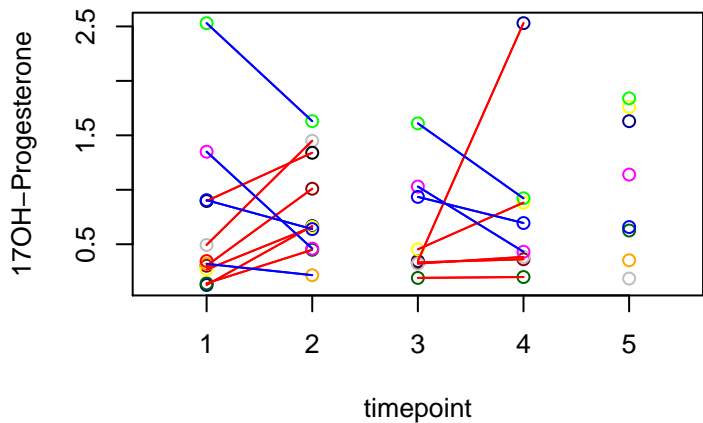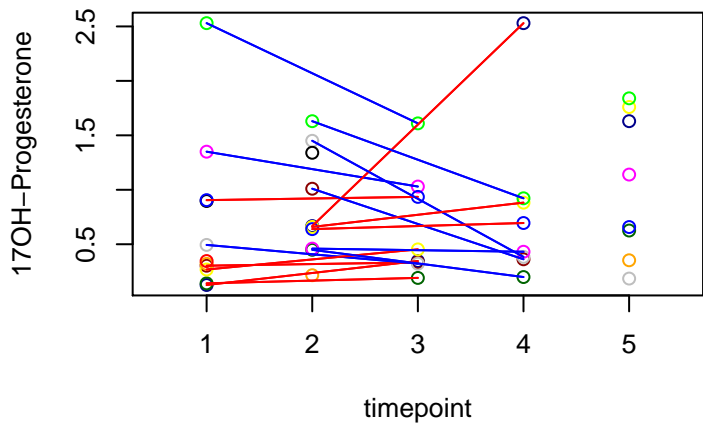

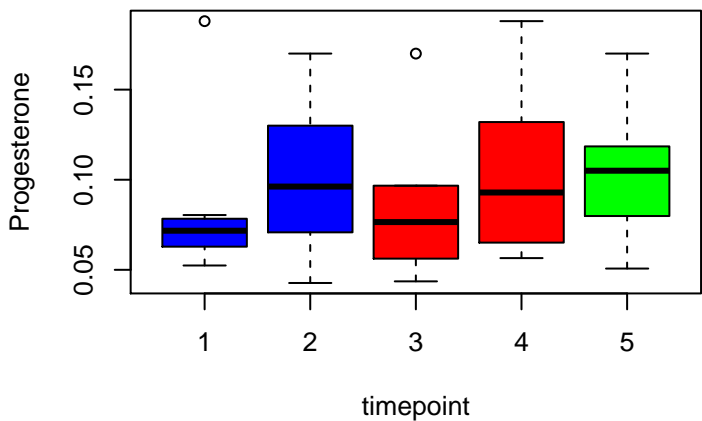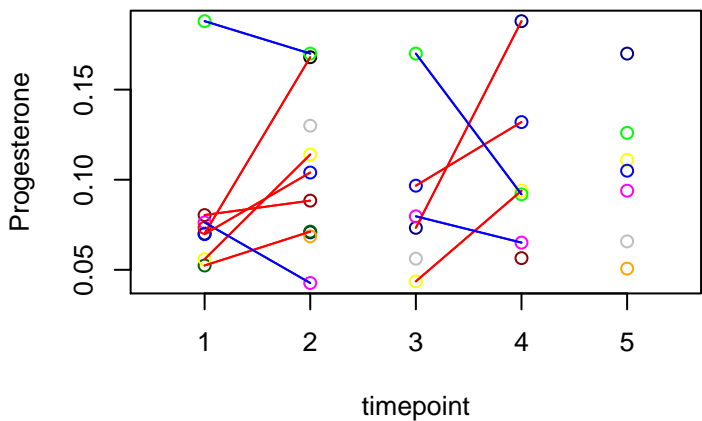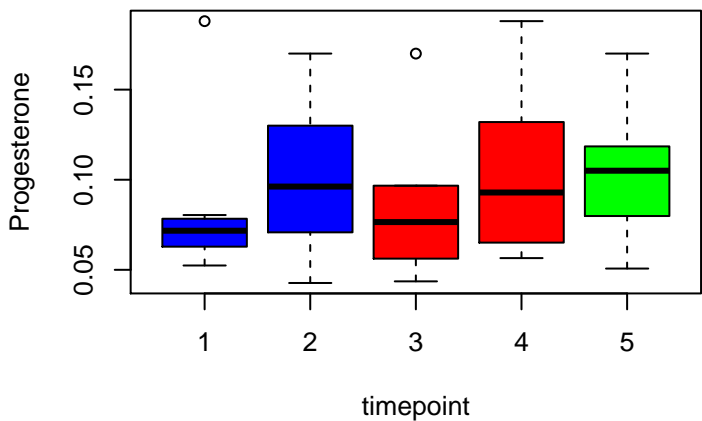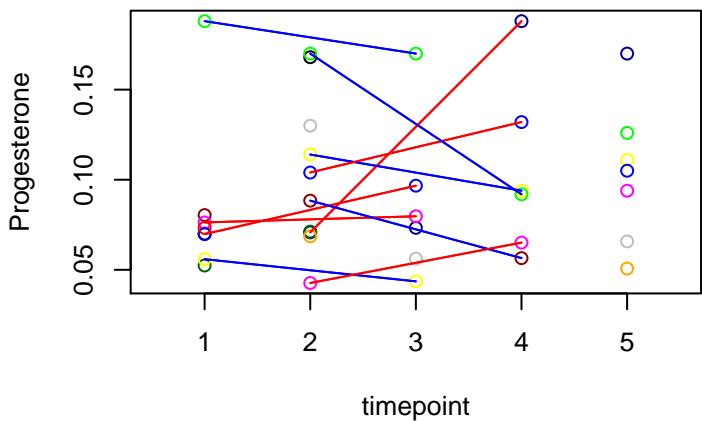

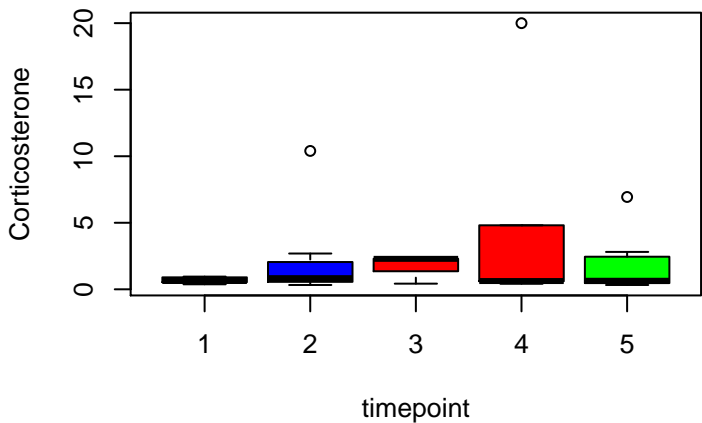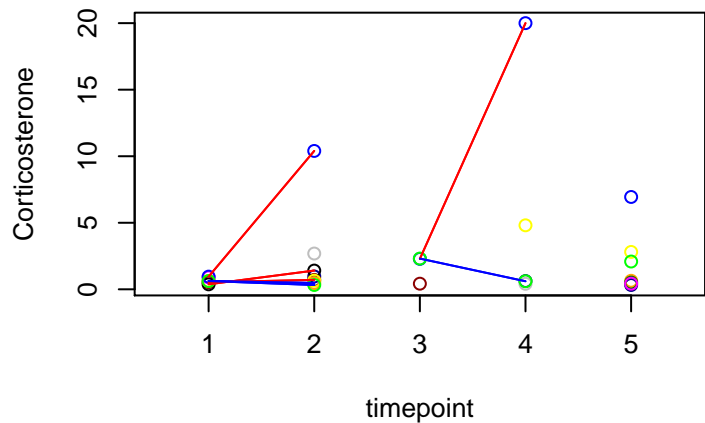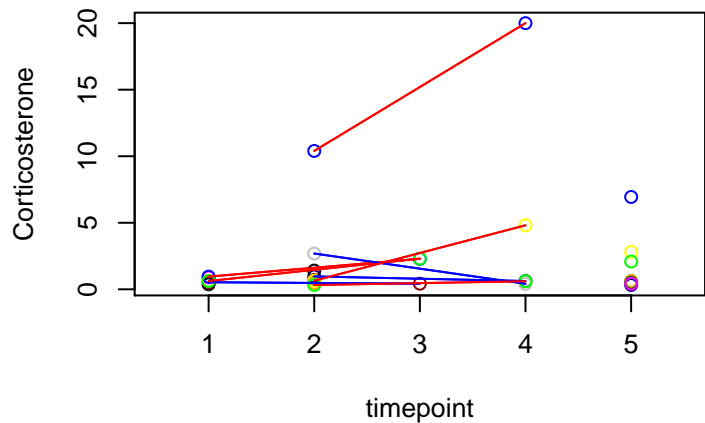

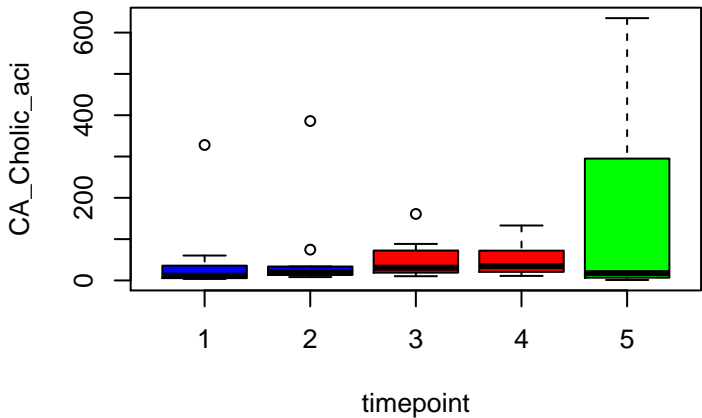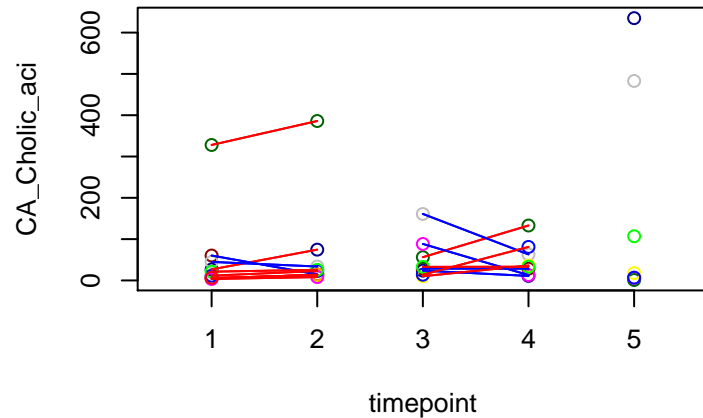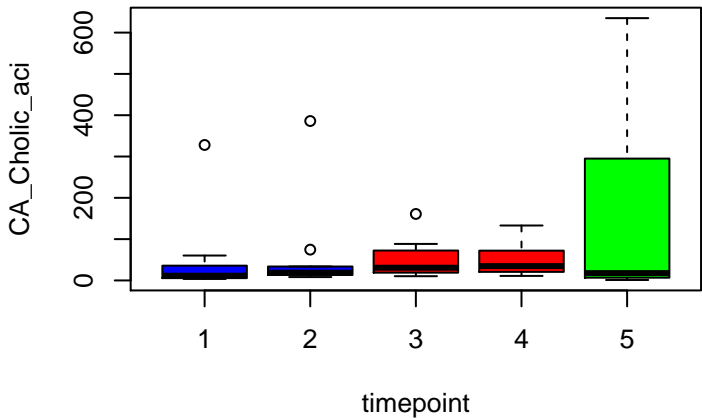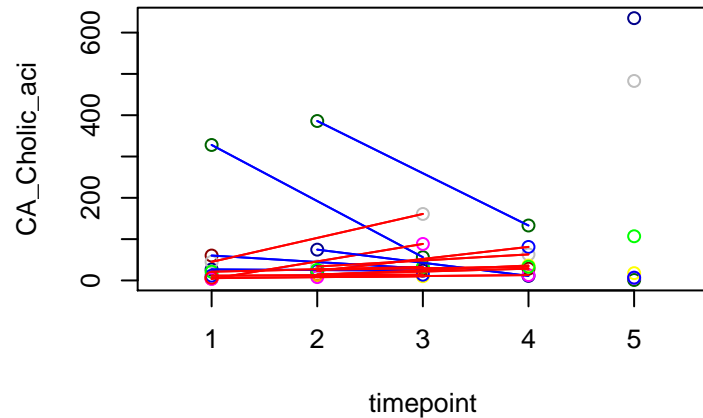

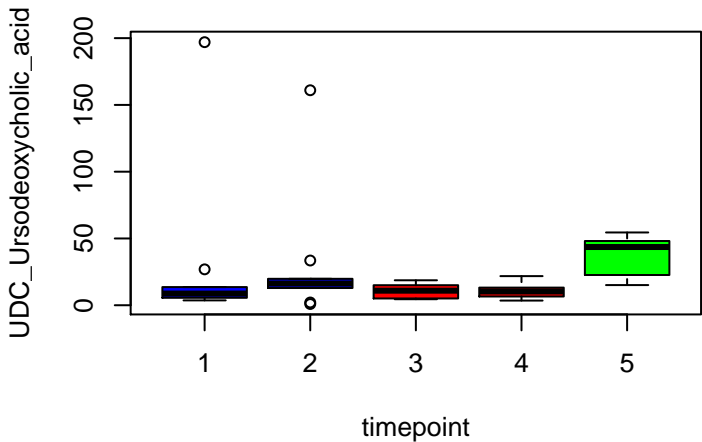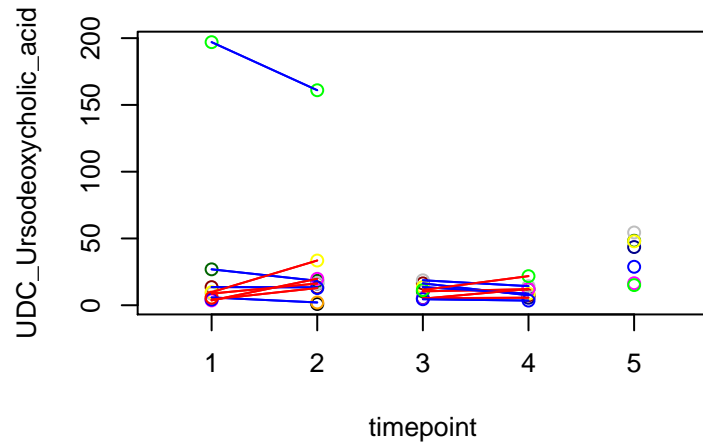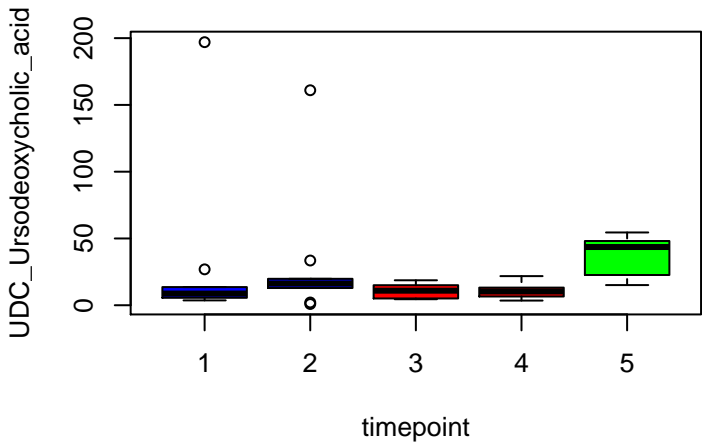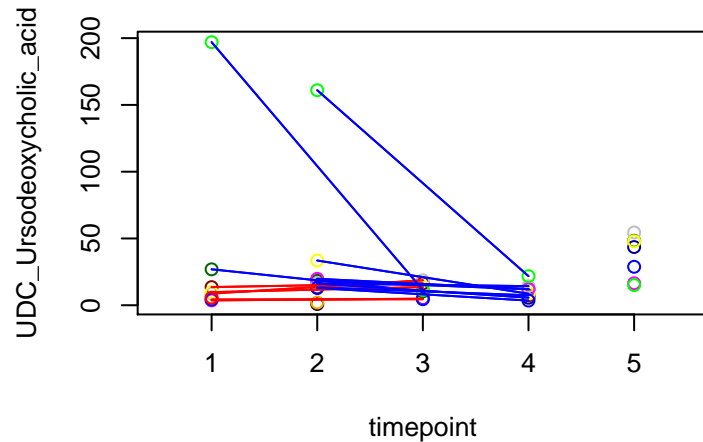

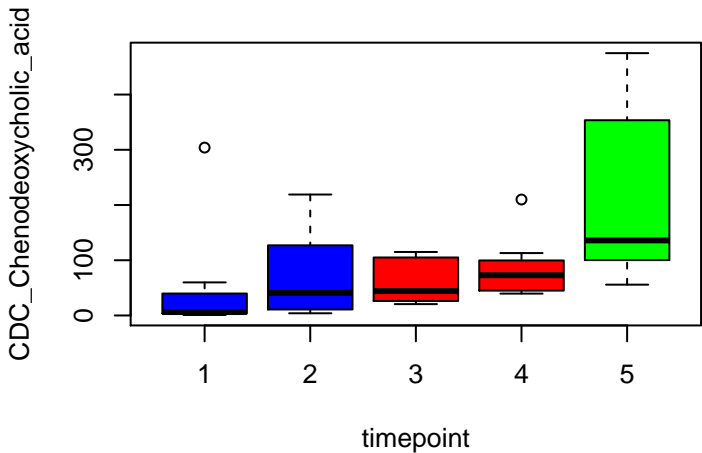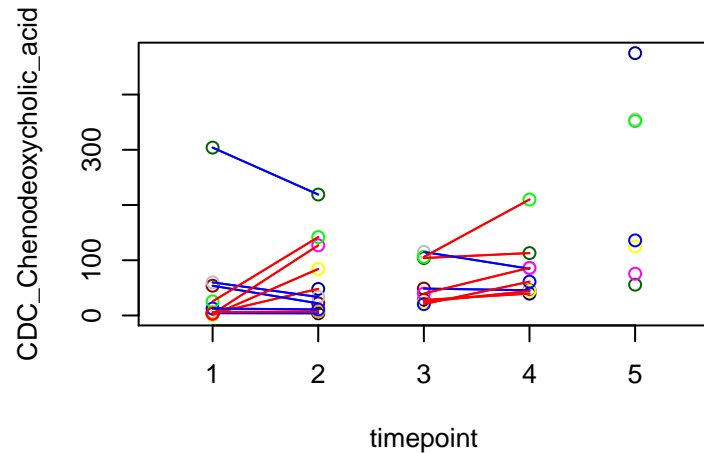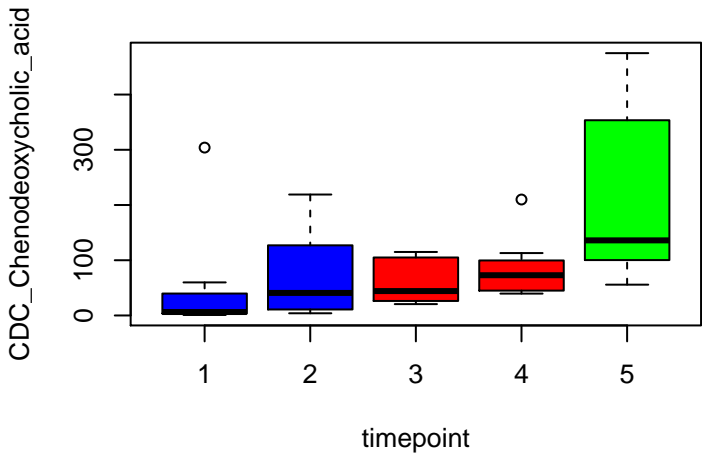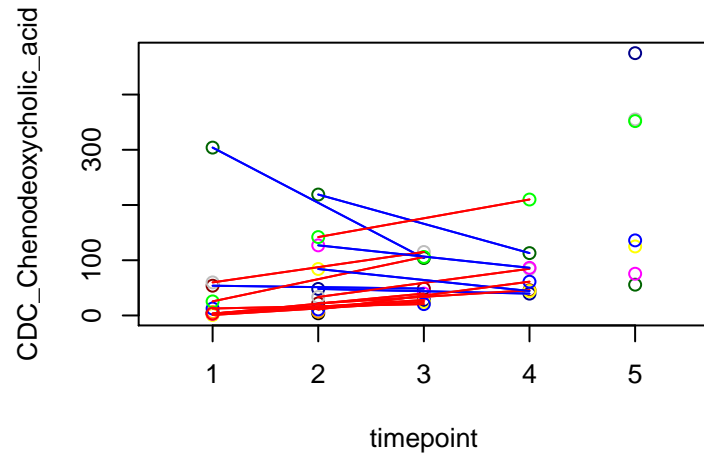

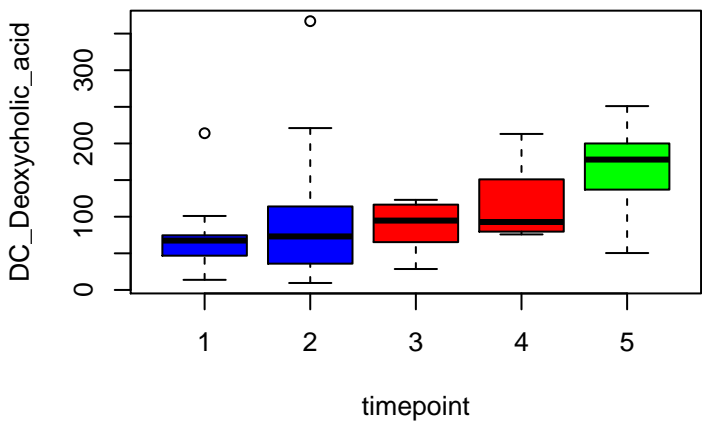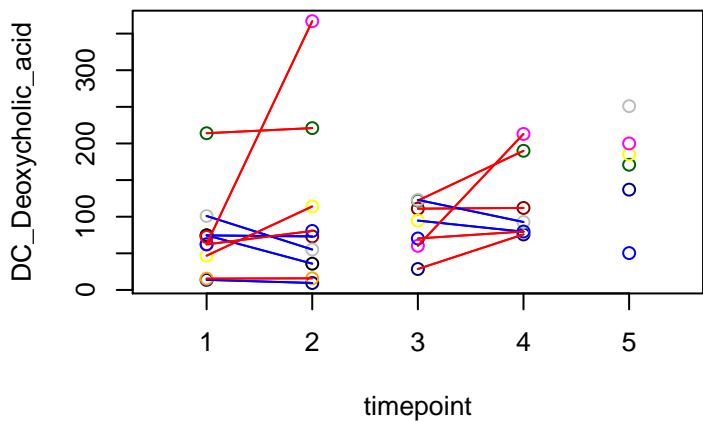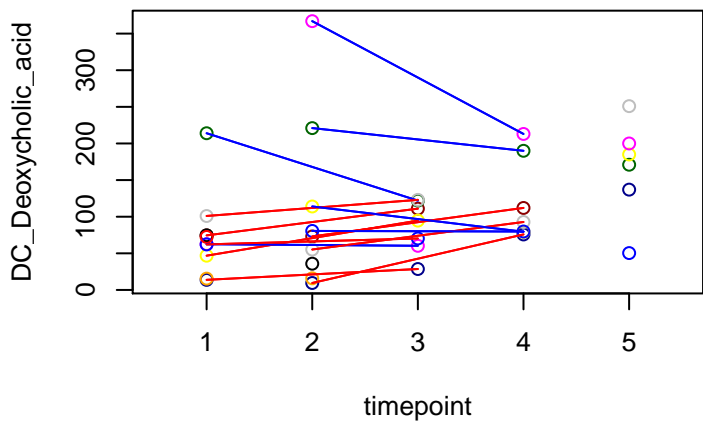



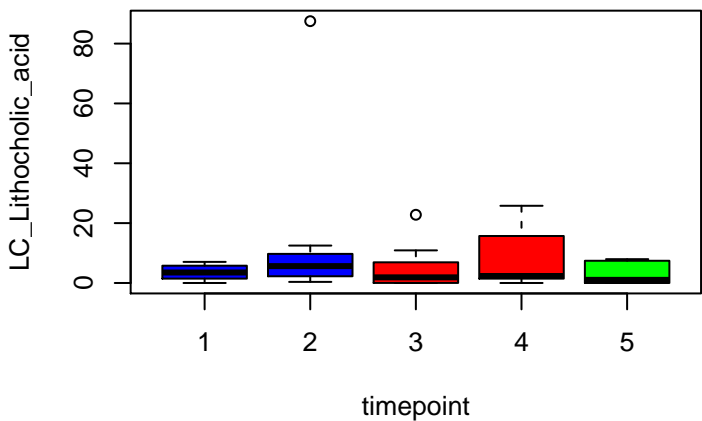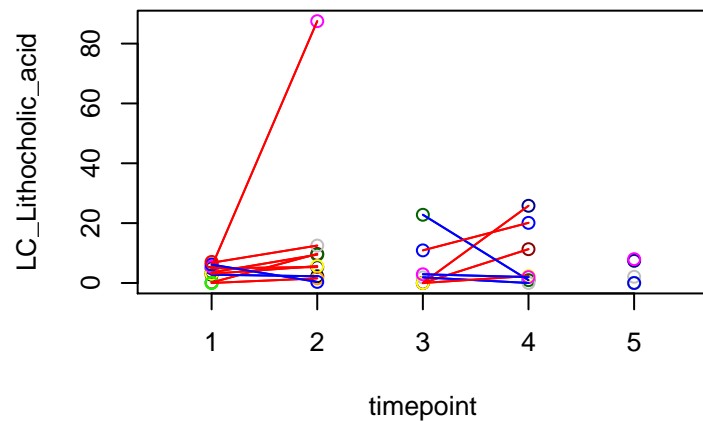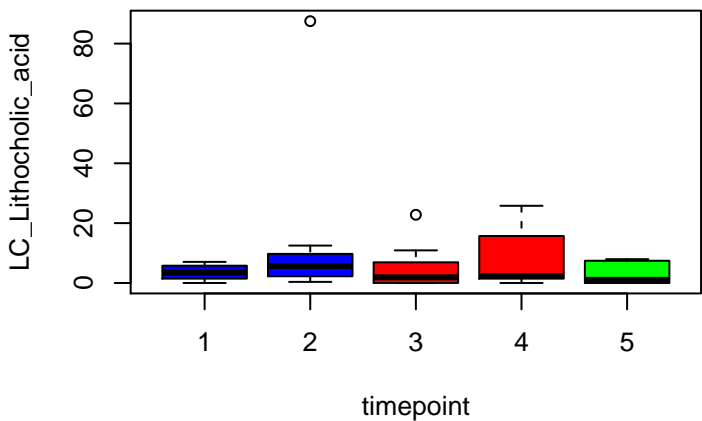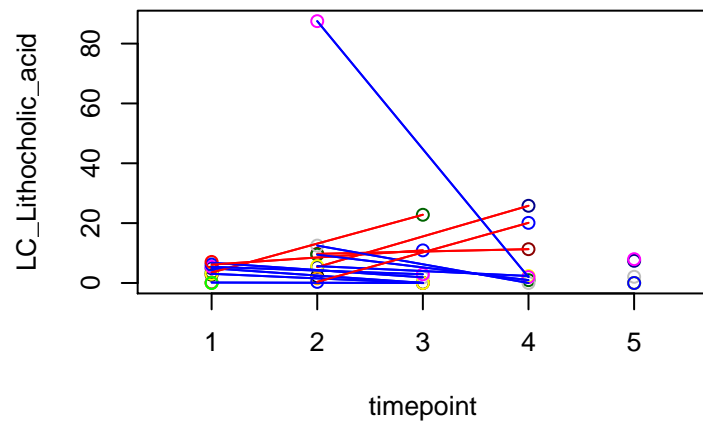

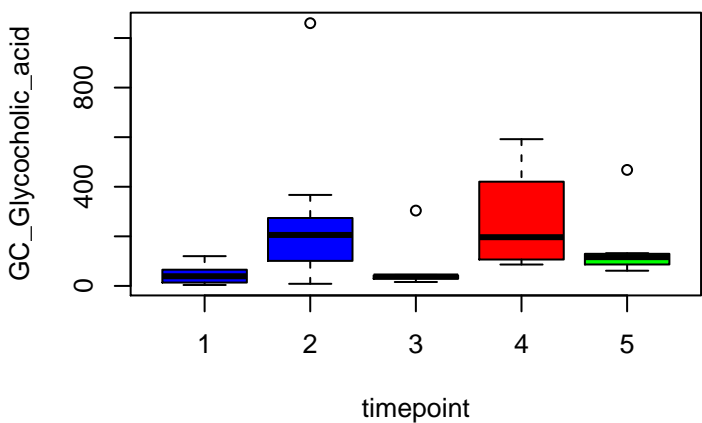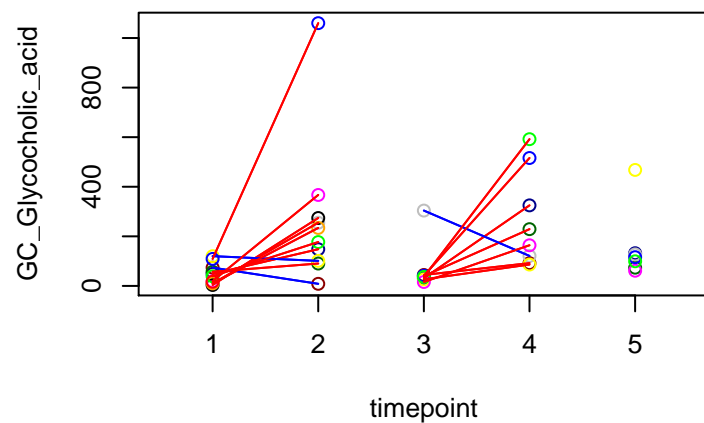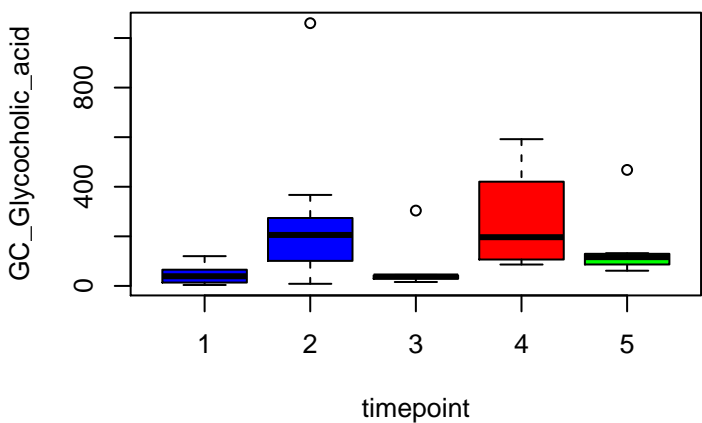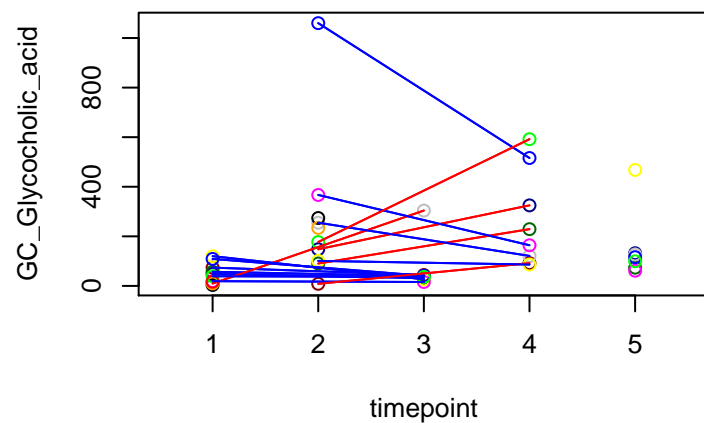

GCDC\_Glycochenodeoxycholic\_acid

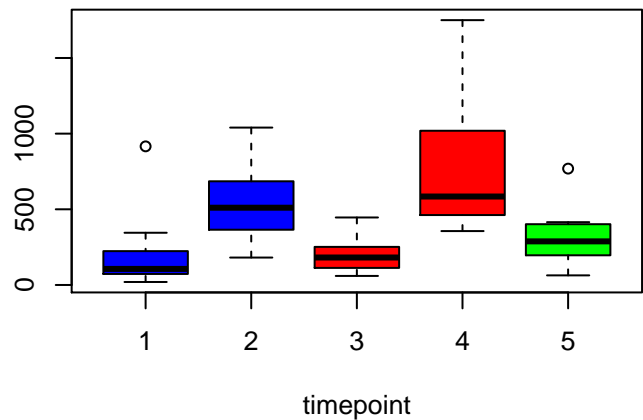

GCDC\_Glycochenodeoxycholic\_acid

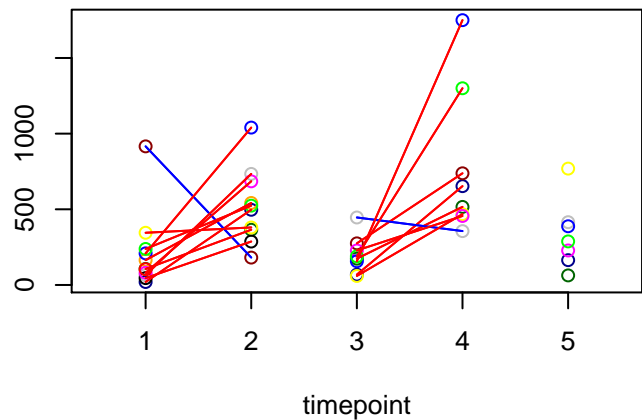

GCDC\_Glycochenodeoxycholic\_acid

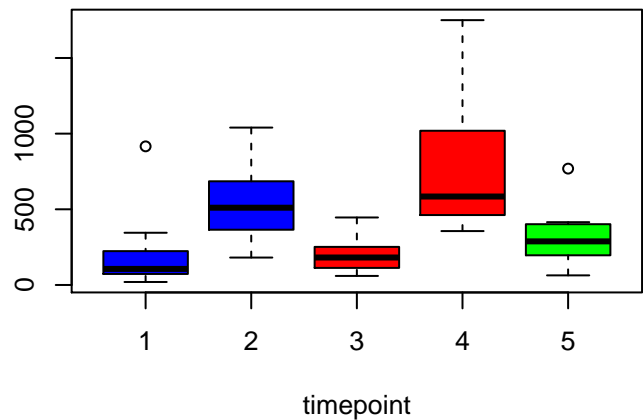

GCDC\_Glycochenodeoxycholic\_acid

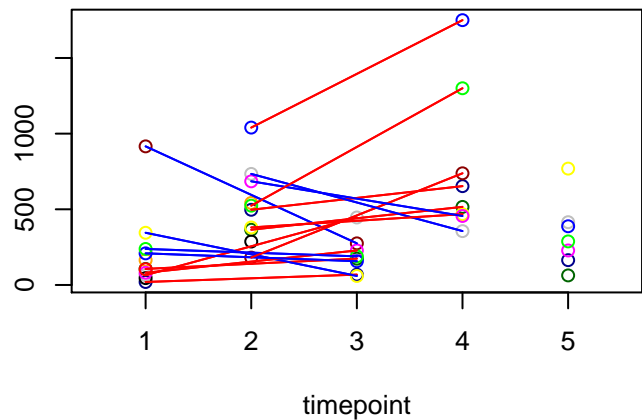

GDC\_Glycodeoxycholic\_acid

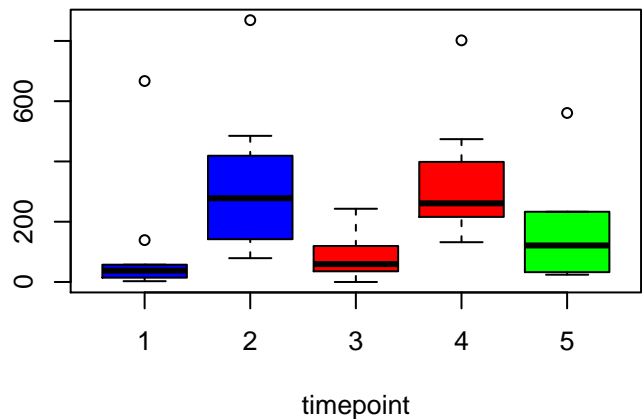

GDC\_Glycodeoxycholic\_acid

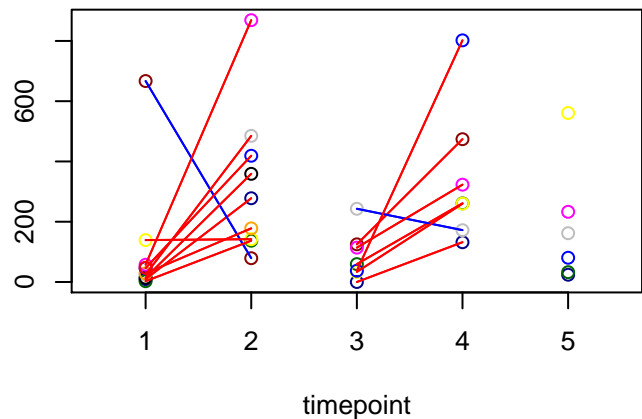

GDC\_Glycodeoxycholic\_acid

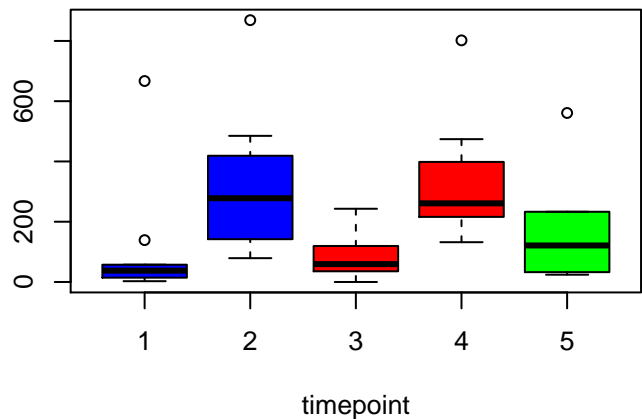

GDC\_Glycodeoxycholic\_acid

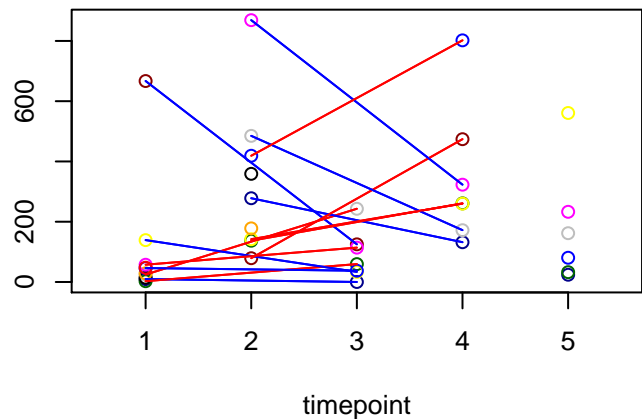

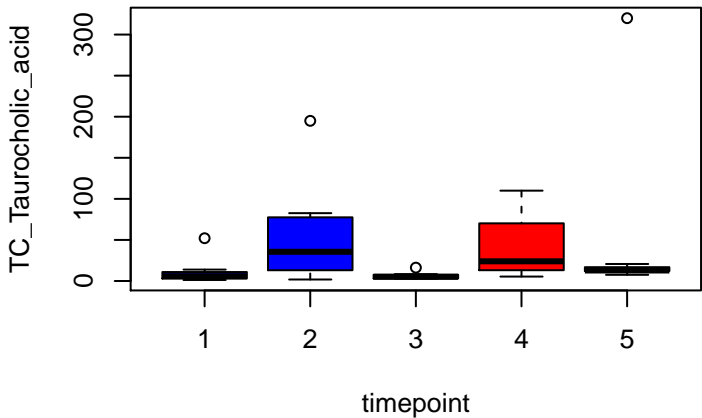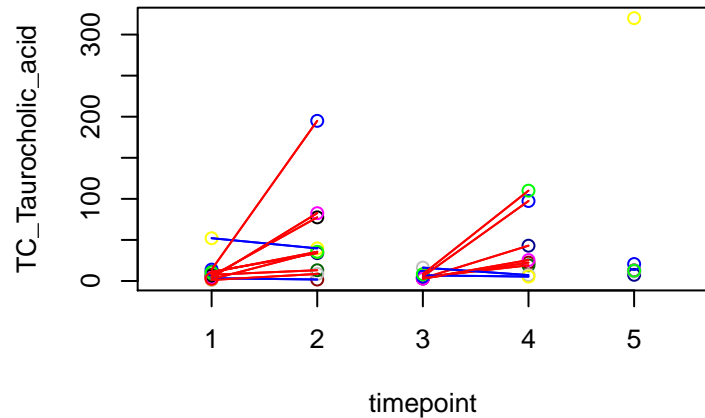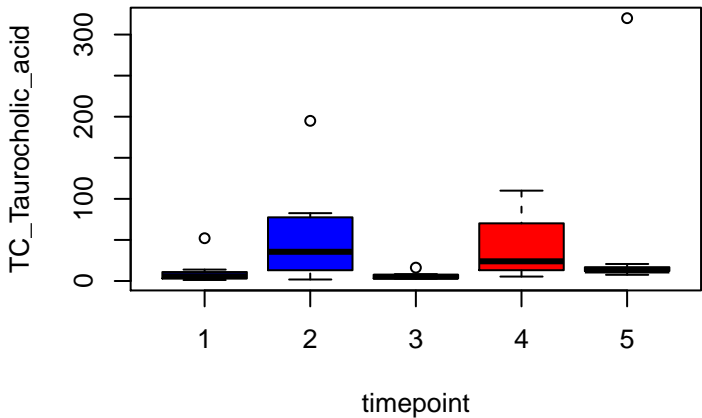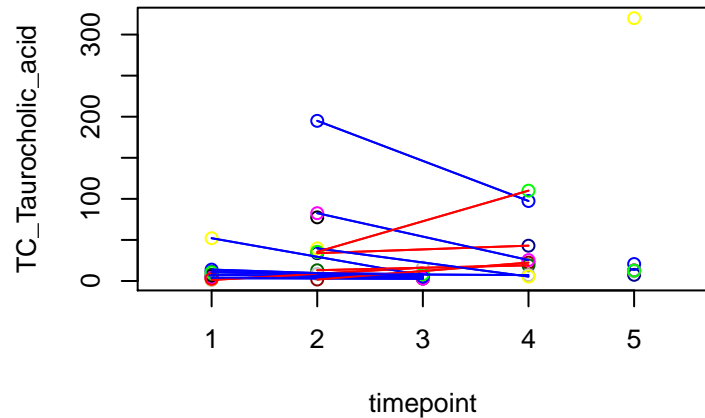

TCDC\_Taurochenodeoxycholic\_acid

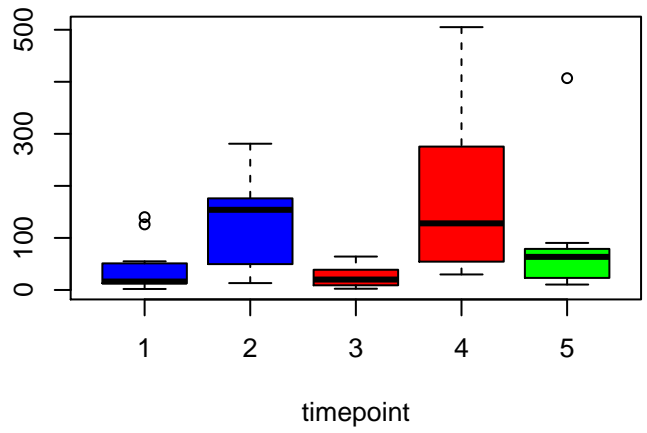

TCDC\_Taurochenodeoxycholic\_acid

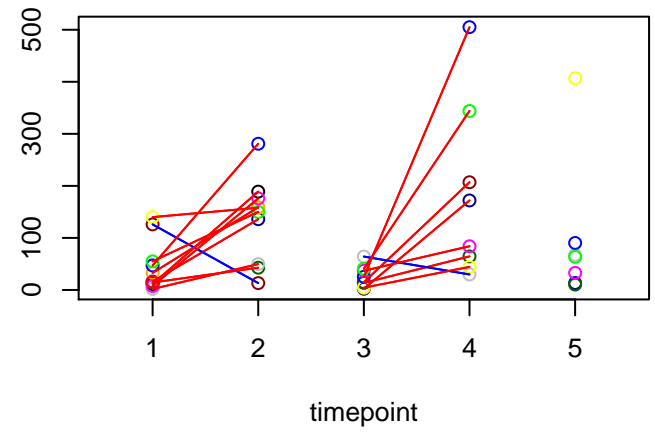

TCDC\_Taurochenodeoxycholic\_acid



TCDC\_Taurochenodeoxycholic\_acid

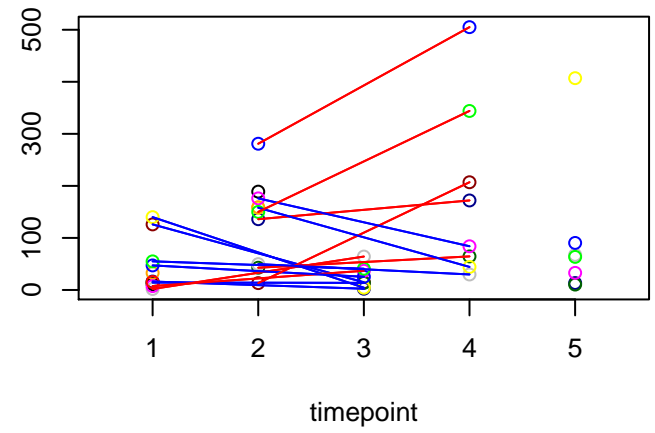

TDC\_Taurodeoxycholic\_acid

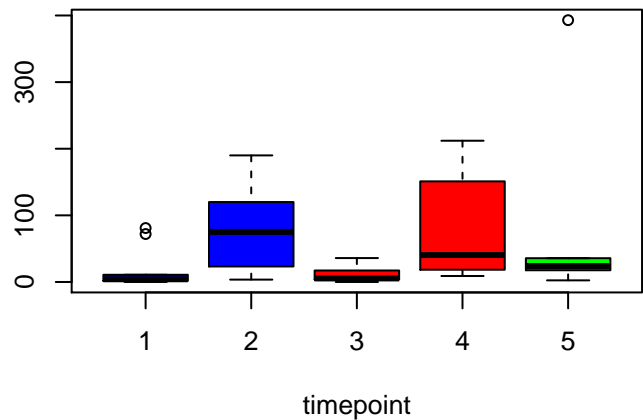

TDC\_Taurodeoxycholic\_acid

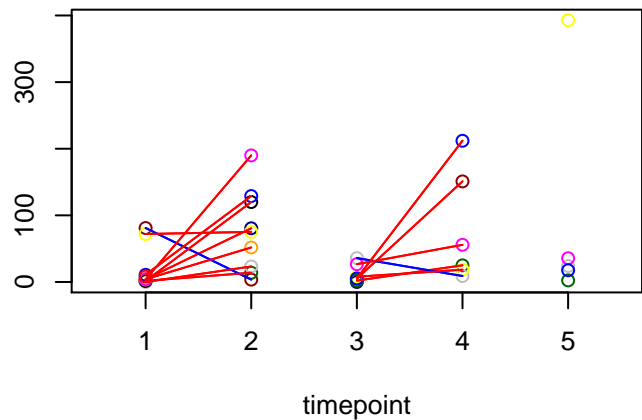

TDC\_Taurodeoxycholic\_acid



TDC\_Taurodeoxycholic\_acid

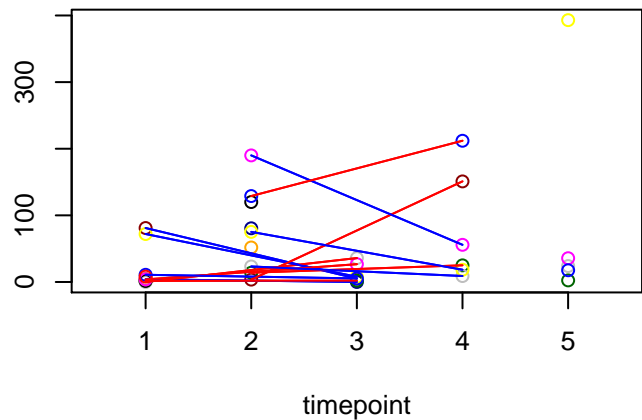

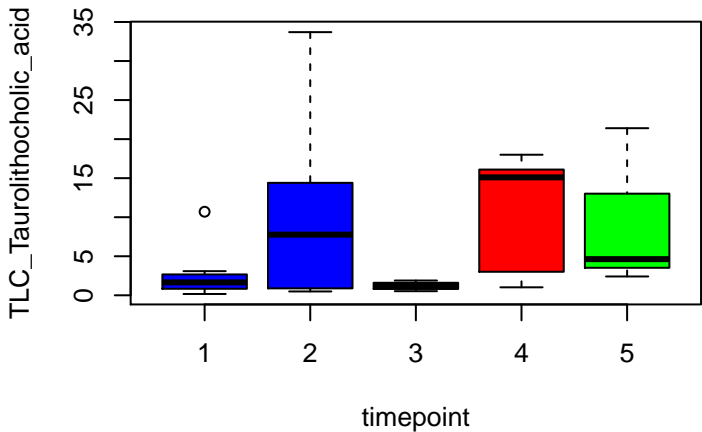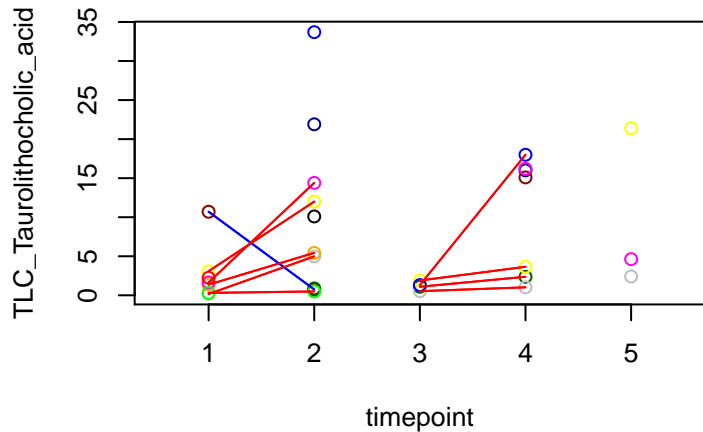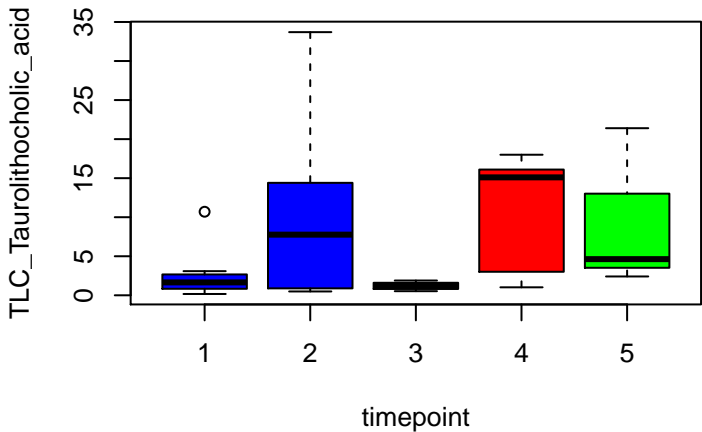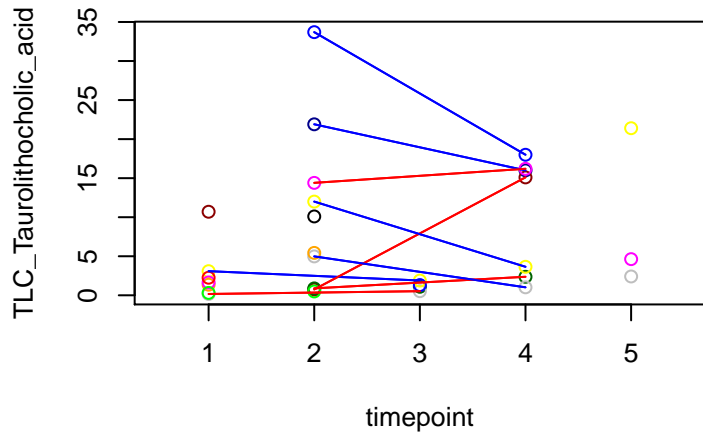

Supplement: MOESM4 [file 9575022]
